# Supplementary material for: Understanding Cu(ii)-based systems for C(sp3)–H bond functionalization: insights into the synthesis of aza-heterocycles
Source: Royal Society of Chemistry journal article supplement (doi:10.1039/d1ob02118d), 2021-11-26
Supplement: d1ob02118d1.pdf [file d1ob02118d1.pdf]

## Electronic Supplementary Information

# Understanding Cu(II)-based systems for C(sp<sup>3</sup>)-H bond functionalization: insights on the synthesis of aza- heterocycles

Marc Camats,<sup>[a]</sup> Isabelle Favier,<sup>[a]</sup> Sonia Mallet-Ladeira,<sup>[b]</sup> Daniel Pla\*<sup>[a]</sup> and Montserrat Gómez\*<sup>[a]</sup>

<sup>a</sup> Laboratoire Hétérochimie Fondamentale et Appliquée (LHFA), Université de Toulouse 3 – Paul Sabatier and  
CNRS UMR 5069, 118 route de Narbonne, 31062 Toulouse Cedex 9, France.

<sup>b</sup> Institut de Chimie de Toulouse, CNRS FR UAR 2599, 118 Route de Narbonne, Toulouse 31062 Cedex 09,  
France

### TABLE OF CONTENTS

|                                                                                                     |                  |
|-----------------------------------------------------------------------------------------------------|------------------|
| <b>A.</b> Instrumentation, Materials and General Methods. Scheme 1 and Figures S1-S4                | <b>S2-S7</b>     |
| <b>B.</b> Optimization of C–H bond functionalization: Tables S1-S5                                  | <b>S8-S12</b>    |
| <b>C.</b> Mechanistic insights: Schemes S2-S4 and Figures S5-S7                                     | <b>S13-S17</b>   |
| <b>D.</b> Synthesis and characterization of compounds type-1, type-2, <b>4</b> and <b>6a</b>        | <b>S18-S31</b>   |
| <b>E.</b> <sup>1</sup> H, <sup>13</sup> C, <sup>19</sup> F NMR and 2D spectra of pure compounds     | <b>S32-S105</b>  |
| <b>F.</b> Crystallographic data of <b>CuA</b> , <b>Cu4B</b> , <b>4</b> and <b>6a</b> : Tables S6-S9 | <b>S106-S109</b> |

## A. Instrumentation, Materials and General Methods

NMR spectra were recorded on a Bruker Advance 300 spectrometer at 293 K (300 MHz for  $^1\text{H}$  NMR, 75.4 MHz for  $^{13}\text{C}$  NMR and 282.4 MHz for  $^{19}\text{F}$ ). Chemical shifts ( $\delta$ ) are reported in ppm referenced to tetramethylsilane (TMS) and coupling constants are reported in Hz. The multiplicity of signals is indicated using the following abbreviations: s = singlet, d = doublet, t = triplet, q = quadruplet, bs = broad singlet, bd = broad doublet, m = multiplet. XRD analyses were run by the technical platform of the ICT (“Institut de Chimie de Toulouse”, UAR 2599). Intensity data were collected at a temperature of 193(2) K on a Bruker-AXS APEX II Quazar diffractometer (**CuA**, **Cu4B** and **4**) equipped with a 30 W air-cooled microfocus source or on a Bruker-AXS D8-Venture with a PHOTON3 detector (**6a**), using  $\text{MoK}\alpha$  radiation (wavelength = 0.71073 Å). Phi- and omega-scans were used. The data were integrated with SAINT<sup>1</sup>, and an empirical absorption correction with SADABS<sup>1</sup> was applied. The structures were solved by an intrinsic phasing method (SHELXT)<sup>2</sup> and refined using the least-squares method on  $F^2$ .<sup>3</sup> All non-H atoms were treated anisotropically. The hydrogen atoms were refined isotropically at calculated positions using a riding model. For **Cu4B**, the alkyl chain is disordered over two positions with occupancy factor values of 0.61 and 0.39. Infrared spectra were recorded using a ThermoNicolet 6700 IR Spectrometer equipped with an ATR detector. The advanced ATR correction algorithm was applied to the spectra recorded with the ATR detector. High-Resolution Mass Spectroscopy results were obtained using a GCT Premier (Waters) apparatus with desorption chemical ionization ( $\text{DCI-CH}_4$ ) or electro-spray ionization (ESI) at the technical platform of the ICT (“Institut de Chimie de Toulouse”, UAR 2599). Elemental analysis was carried out using a PERKIN ELMER 2400 series II analyzer. GC analyses were performed on a GC Perkin Elmer Clarus 500 with a flame ionization

<sup>1</sup> Bruker, SAINT and SADABS, Bruker AXS Inc., Madison, Wisconsin, USA.

<sup>2</sup> Sheldrick, G. M. SHELXT – Integrated space-group and crystal-structure determination. *Acta Cryst.* **2015**, *A71*, 3-8.

<sup>3</sup> Sheldrick, G. M. Crystal structure refinement with SHELXL. *Acta Cryst.* **2015**, *C71*, 3-8.

detector (FID) using a SGE BPX5 column (30 m x 0.32 mm x 0.25 mm) composed of 5% phenylmethylsiloxane and a Perkin Elmer Clarus 560 S mass spectrometer. The injector temperature was 250 °C and the flow was 2 mL/min. Voltammetric measurements were carried out with a Autolab PGStat204 Potentiostat (Metrohm) using NOVA 2.1 software. Experiments were performed at room temperature in a homemade three-electrode cell. The reference electrode consisted of a saturated calomel electrode (Biologic) with a platinum wire (homemade) counter electrode and a Pt working electrode (Metrohm). A solution of 0.1 M tetrabutylammonium hexafluorophosphate (Merck, purity  $\geq 99.0\%$  for electrochemical analysis) was used as electrolyte and the working electrode was polished before each measurement. Reactions under microwave activation were carried out on a microwave synthesizer CEM Discover instrument equipped with an automated CEM Explorer autosampler.

**Materials.** Purchased chemicals were used without further purification. The solvents used were of synthesis grade ( $\text{CH}_3\text{CN}$ ,  $\text{CHCl}_3$ , EtOAc, AcOH,  $\text{CF}_3\text{COOH}$ , EtOH and  $\text{CH}_2\text{Cl}_2$ ).  $\text{Cu}(\text{OPiv})_2$  was prepared by ion exchange  $\text{Cu}(\text{NO}_3)_2 \cdot 3\text{H}_2\text{O}$  and  $\text{KOPiv}$  as detailed below.

### Synthesis of $\text{Cu}(\text{OPiv})_2$

Pivalic acid (1.5 mL, 0.01 mmol) was added to a solution of  $\text{Cu}(\text{NO}_3)_2 \cdot 3\text{H}_2\text{O}$  (2.416 g, 10 mmol) and  $\text{KOPiv}$  (2.804 g, 20 mmol) in EtOH (15 mL). The mixture was stirred at rt for 1 h and the solid was filtered out. The solvent was then removed under vacuum obtaining a blue-green solid, which was dissolved in pentane (20 mL) with the dropwise addition of EtOH (0.2 mL) and allowed to crystallize overnight at -10 °C obtaining a green crystalline powder (1.7030 g, 65%).<sup>4</sup>

---

<sup>4</sup> J.-H. Zhou, Z. Liu, Y.-Z. Li, Y. Song, X.-T. Chen, X.-Z. You, *J. Coord. Chem.* **2006**, 59, 147.

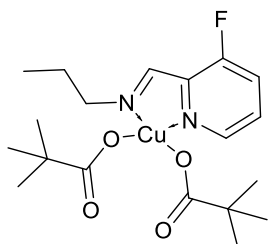

### Synthesis of Cu(OPiv)<sub>2</sub>-aldimine **1a** complex

Cu(OPiv)<sub>2</sub> (80.0 mg, 0.30 mmol) was added in one solid portion to a solution of aldimine **1a** (50.2 mg, 0.30 mmol) in anhydrous MeCN (2 mL) and the reaction mixture was stirred for 60 min at rt. The mixture was then filtered through a 0.2 μm PTFE filter and the solvent was removed under reduced pressure, furnishing the complex (130.5 mg, quant.) as a dark solid.

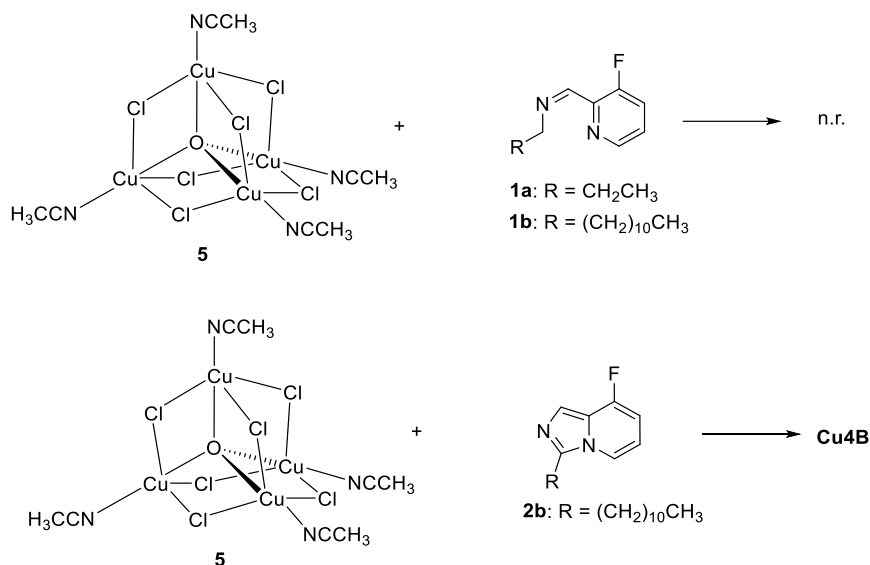

**Scheme S1.** Reactivity studies of **5** with **1a-b** and **2b**. A solution of **1** or **2** (0.30 mmol) and **5** (71.2 mg, 0.11 mmol) in CH<sub>3</sub>CN (4 mL) was heated to 100 °C for 10 min under microwave irradiation (max. 200 W).

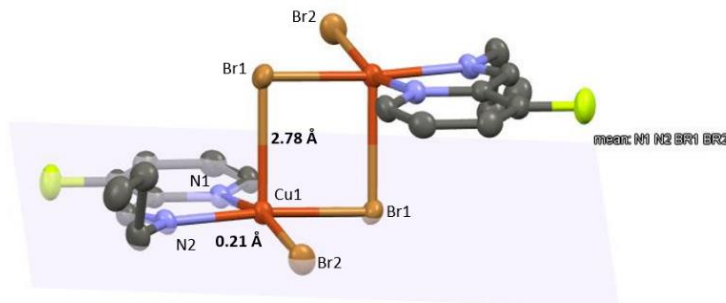

**Figure S1.** XRD crystal structure of complex **CuA** showing the distorted square planar arrangement around the metal center and the distances Cu1-Br1(apical) and Cu1-(N1N2Br1Br2) plane.

Cone voltage = 30 V Xevo G2 QTof 27-Jul-2020 10:20:16  
Cu Piv Pr HR 80 (0.498) 1: TOF MS ES+  
1.34e6

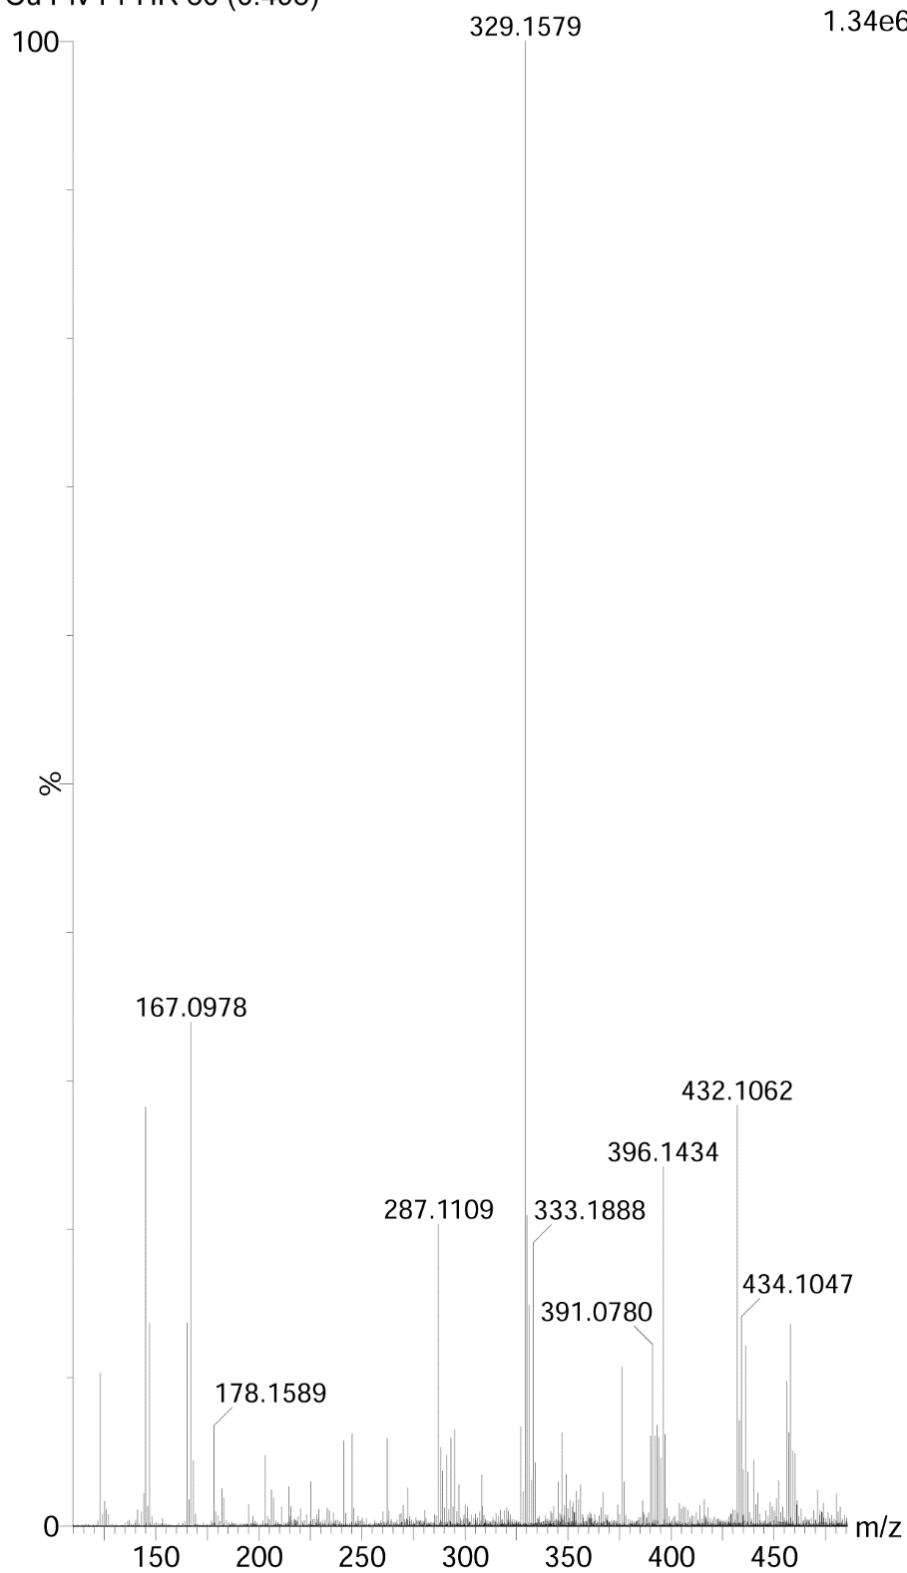

**Figure S2.** HRMS spectra of **1a** complexation with Cu(OPiv)<sub>2</sub> in MeCN at r.t.: bis-pivalate [Cu(OPiv)<sub>2</sub>(**1a**)] species (m/z 432.1), mono-pivalate [Cu(OPiv)(**1a**)] species (m/z 330.1) and a plausible species corresponding to a C–H activation event (m/z 329).

**Synthesis of preformed copper nanoparticles (CuNPs)**

Copper(I) mesityl (68.5 mg; 0.375 mmol) and 15 mL of poly(ethylene glycol) dimethyl ether, which was previously dried at 120 °C overnight under vacuum (PEG,  $M_n$  *ca.* 250), were placed in a Fisher-Porter bottle under argon atmosphere. After maintaining the mixture under vacuum for *ca.* 3 minutes, the mixture was pressurized with H<sub>2</sub> (3 bar) and heated at 120 °C for 2 h, obtaining a dark red colloidal suspension. This suspension was transferred by cannula to a centrifuge tube under argon atmosphere together with 5 mL of degassed pentane. The mixture was centrifuged (3500 rpm) for 15 minutes and the supernatant removed under argon. The solid was redispersed in 3 mL of degassed THF and 9 mL of degassed pentane were added; the resulting suspension was again centrifuged (3500 rpm; 15 min). The supernatant was removed under argon and the solid dried overnight, obtaining a dark red powder (33 mg; 70% Cu by ICP-MS).

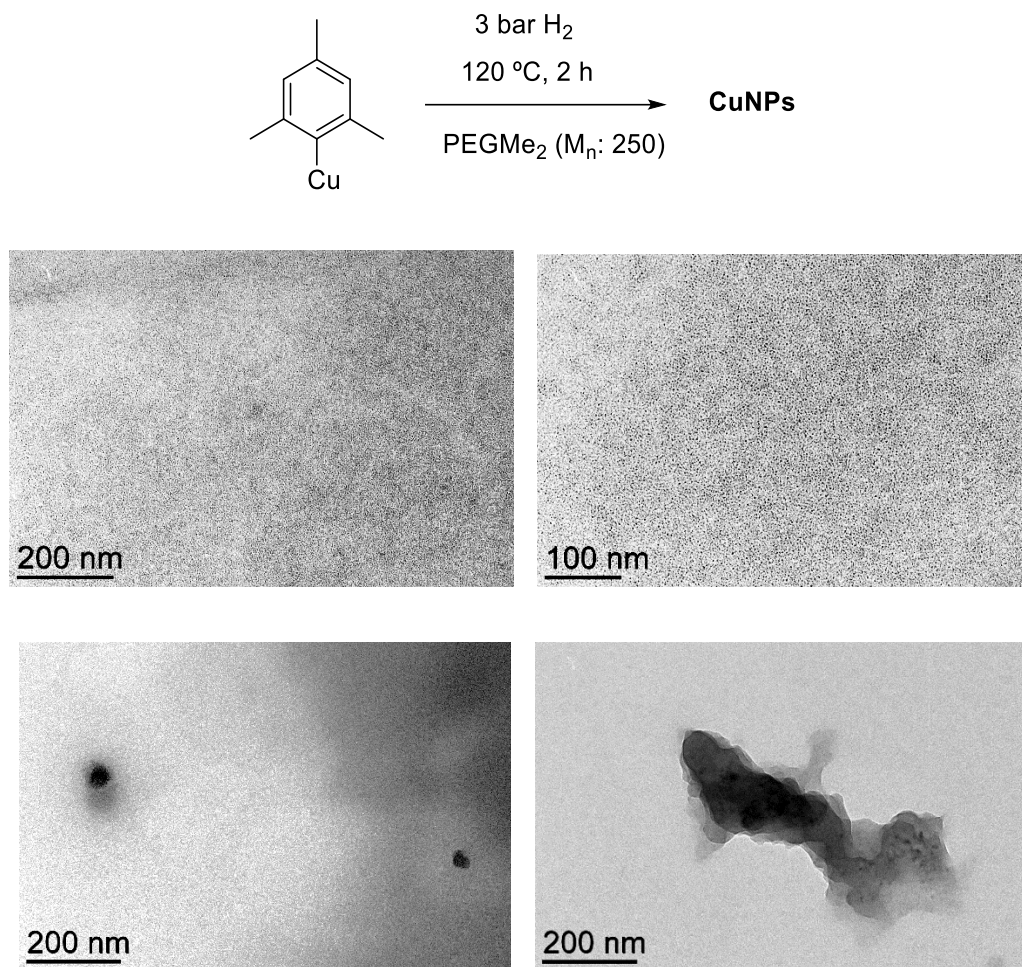

**Figure S3.** TOP: Synthesis of CuNPs applied in the synthesis of **2a** and **6a**. CENTER: TEM images corresponding to preformed CuNPs ( $d_{\text{mean}} = 1.1 \pm 0.3$  nm). BOTTOM: TEM images after catalytic reaction in the absence (left) and in the presence (right) of DDQ.

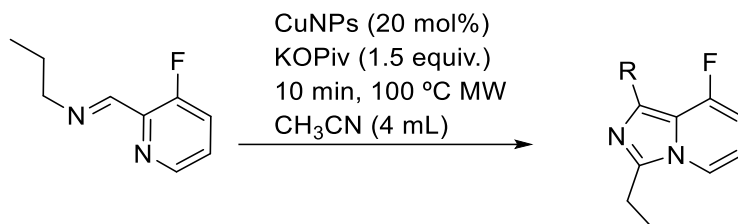

| Oxidant                   | Yield        | Conv. |
|---------------------------|--------------|-------|
| None (reaction under air) | 22% (R = H)  | 25%   |
| DDQ (1 equiv.)            | 87% (R = CN) | 100%  |

**Figure S4.** C–H bond functionalization reactions using Cu(0) NPs (20 mol%).

### B. C–H bond functionalization: Reaction optimization tables.

**Table S1.** Solvent screening for the C–H activation towards the formation of imidazo[1,5-*a*]pyridines under microwave irradiation (200 W) starting from the complex **CuA**.

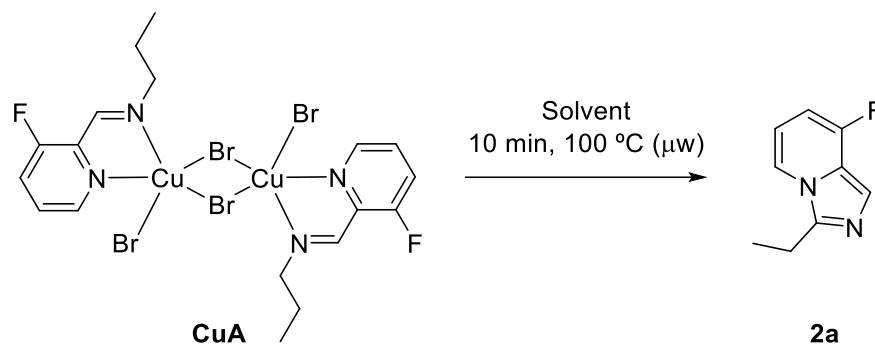

| Entry | Solvent                      | Conversion (%) <sup>a</sup> | Yield (%) <sup>a</sup> |
|-------|------------------------------|-----------------------------|------------------------|
| 1     | CHCl <sub>3</sub>            | 0                           | 0                      |
| 2     | CH <sub>3</sub> CN           | 0                           | 0                      |
| 3     | Ac <sub>2</sub> O            | 100                         | 0 <sup>b</sup>         |
| 4     | AcOH-CHCl <sub>3</sub> (2:8) | 5                           | 3                      |

<sup>a</sup> Reaction conditions: a solution of the CuBr<sub>2</sub>-aldimine complex **CuA** (0.15 mmol, 117.0 mg) in the specified solvent (4 mL) was heated to 100 °C for 10 min under microwave irradiation (max. 200 W). The reaction crude was diluted with CH<sub>2</sub>Cl<sub>2</sub> (15 mL) and washed with tetrasodium ethylenediaminetetraacetate (3 × 15 mL, 0.4 M solution, pH 10-11). The combined organic extracts were dried with anhydrous Na<sub>2</sub>SO<sub>4</sub>, filtered and solvents evaporated under reduced pressure. Conversions and yields were determined by <sup>19</sup>F NMR using 4-fluorotoluene as standard. <sup>b</sup> A number of decomposition products was obtained, the main one being 3-fluoropyridine-2-carbaldehyde precursor (in 28%) as determined by <sup>1</sup>H NMR and <sup>19</sup>F NMR.



**Table S2.** Base effect for the C–H activation towards the formation of imidazo[1,5-*a*]pyridines under microwave irradiation (200 W) starting from the complex **CuA**.

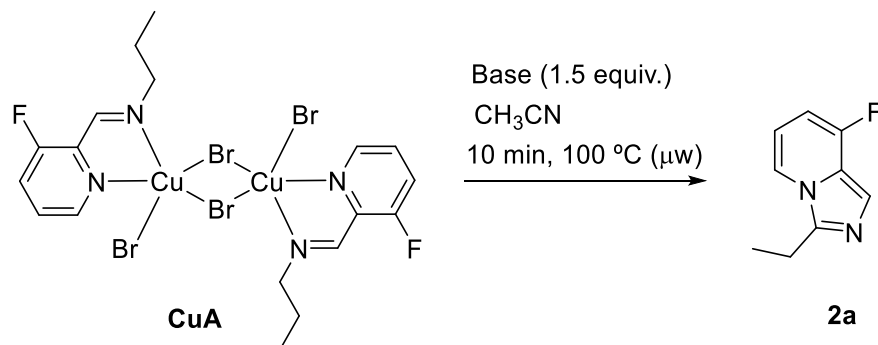

| Entry          | Base               | Conversion (%) <sup>a</sup> | 2a (%) <sup>a</sup> |
|----------------|--------------------|-----------------------------|---------------------|
| 1 <sup>b</sup> | CsOAc              | 8                           | 3                   |
| 2              | KOAc               | 26                          | 25                  |
| 3              | KOH                | 0                           | 0                   |
| 4 <sup>c</sup> | KO <sup>t</sup> Bu | 100                         | 0                   |
| 5              | No base            | 0                           | 0                   |

<sup>a</sup> Reaction conditions: general procedure C2 in CH<sub>3</sub>CN as solvent, followed by work-up B. Conversions and yields were determined by <sup>19</sup>F NMR with 4-fluorotoluene as standard. <sup>b</sup> CsOAc is highly insoluble in CH<sub>3</sub>CN. <sup>c</sup> Only degradation by-products were obtained in the presence of KO<sup>t</sup>Bu.

**Table S3.** Cu(II) screening studies for C(sp<sup>3</sup>)-H functionalization and cyclization towards the formation of imidazo[1,5-*a*]pyridines under microwave irradiation.<sup>a</sup>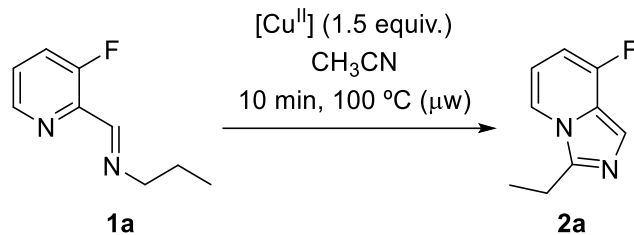

| Entry          | [Cu <sup>II</sup> ]                                   | Conversion (%) <sup>b</sup> | Yield (%) <sup>b</sup>  |
|----------------|-------------------------------------------------------|-----------------------------|-------------------------|
| 1              | CuBr <sub>2</sub> +1.5 equiv.<br>NBu <sub>4</sub> OAc | 62                          | 52                      |
| 2              | Cu(OAc) <sub>2</sub>                                  | 73<br>(60) <sup>c</sup>     | 62<br>(40) <sup>c</sup> |
| 3              | Cu(OOCH) <sub>2</sub> ·4H <sub>2</sub> O              | 85                          | 55                      |
| 4              | Cu(OBz) <sub>2</sub>                                  | 68                          | 14                      |
| 5              | Cu(OPiv) <sub>2</sub>                                 | 95                          | 83                      |
| 6              | CuBr <sub>2</sub>                                     | 0                           | 0                       |
| 7 <sup>d</sup> | Cu(OPiv) <sub>2</sub>                                 | >99 <sup>e</sup>            | 0                       |

<sup>a</sup> Reaction conditions: A solution of aldimine **1a** (0.30 mmol) and a Cu(II) salt (0.45 mmol) in CH<sub>3</sub>CN (4 mL) was heated to 100 °C for 10 min under microwave irradiation (max. 200 W). The reaction crude was diluted with CH<sub>2</sub>Cl<sub>2</sub> (15 mL) and washed with tetrasodium ethylenediaminetetraacetate (3 × 15 mL, 0.4 M solution, pH 10-11). The combined organic extracts were dried with anhydrous Na<sub>2</sub>SO<sub>4</sub>, filtered and solvents evaporated under reduced pressure. <sup>b</sup> Conversions and yields were determined by <sup>19</sup>F NMR with 4-fluorotoluene as standard. <sup>c</sup> Results obtained under standard thermal conditions at 100 °C for 8 h. <sup>d</sup> One-pot reaction conditions: a solution of 1-propylamine (0.30 mmol), 3-fluoro-2-pyridinecarboxaldehyde (0.30 mmol) and Cu(OPiv)<sub>2</sub> (0.45 mmol) in CH<sub>3</sub>CN (4 mL) was heated to 100 °C for 10 min under microwave irradiation (max. 200 W). <sup>e</sup> Quantitative conversion of 3-fluoro-2-pyridinecarboxaldehyde starting material.

**Table S4.** Solvent screening studies for C–H cyclization towards the formation of imidazopyridines under microwave irradiation (max. power 200 W).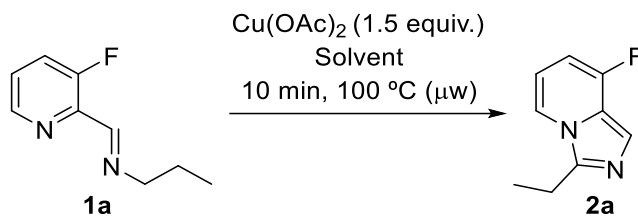

| Entry | Solvent                  | Conversion <sup>a</sup> (%) | Yield <sup>a</sup> (%) |
|-------|--------------------------|-----------------------------|------------------------|
| 1     | $\text{CF}_3\text{COOH}$ | 100                         | 0                      |
| 2     | EtOAc                    | 100                         | 0                      |
| 3     | Glycerol                 | 14                          | 14                     |
| 4     | AcOH                     | 75                          | 10                     |
| 5     | EtOH                     | 18                          | 7                      |
| 6     | $\text{CH}_3\text{CN}$   | 70                          | 48                     |
| 7     | $\text{CHCl}_3$          | 20                          | 17                     |

<sup>a</sup> Reaction conditions: A solution of aldimine **1a** (0.30 mmol) and  $\text{Cu}(\text{OAc})_2$  (81.7 mg, 0.45 mmol) in  $\text{CH}_3\text{CN}$  (4 mL) was heated to 100 °C for 10 min under microwave irradiation (max. 200 W). The reaction crude was diluted with  $\text{CH}_2\text{Cl}_2$  (15 mL) and washed with tetrasodium ethylenediaminetetraacetate ( $3 \times 15$  mL, 0.4 M solution, pH 10–11). The combined organic extracts were dried with anhydrous  $\text{Na}_2\text{SO}_4$ , filtered and solvents evaporated under reduced pressure. Conversions and yields were determined by  $^{19}\text{F}$  NMR with 4-fluorotoluene as standard.

**Table S5.** Screening of oxidizing agents to enable the catalytic formation of imidazo[1,5-*a*]pyridines under microwave irradiation.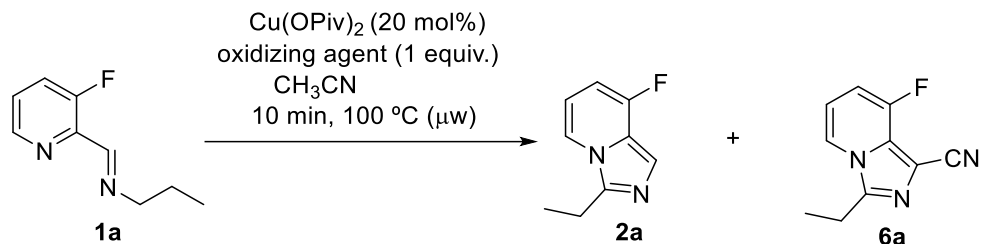

| Entry           | Oxidant                                                                                                    | Conversion (%) <sup>a</sup> | Selectivity         |                            |
|-----------------|------------------------------------------------------------------------------------------------------------|-----------------------------|---------------------|----------------------------|
|                 |                                                                                                            |                             | 2a (%) <sup>a</sup> | 6a (%) <sup>a</sup>        |
| 1               | Piv <sub>2</sub> O                                                                                         | 20                          | 12                  | 0                          |
| 2               | 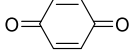                          | 20                          | 14                  | 0                          |
| 3               | K <sub>3</sub> [Fe(CN) <sub>6</sub> ], dibenzo-18-crown-6                                                  | 68                          | 23                  | 0                          |
| 4               |                           | 100                         | 0                   | 87                         |
| 5               |                           | 100                         | 0                   | 0                          |
| 6               |                          | 100                         | 0                   | 0                          |
| 7               |                         | 100                         | 0                   | 0                          |
| 8               |                         | 100                         | 0                   | 0                          |
| 9               |                         | 100                         | 0                   | 0                          |
| 10              | K <sub>3</sub> [Fe(CN) <sub>6</sub> ]                                                                      | 100                         | 0                   | 0                          |
| 11              | K <sub>3</sub> [Fe(CN) <sub>6</sub> ], PhNEt <sub>3</sub> Cl                                               | 100                         | 0                   | 0                          |
| 12              | K <sub>3</sub> [Fe(CN) <sub>6</sub> ], H <sub>2</sub> O                                                    | 96                          | 0                   | 0                          |
| 13              | BzOOBz                                                                                                     | 100                         | 0                   | 0                          |
| 14              | Air <sup>b</sup>                                                                                           | 82                          | 0                   | 0                          |
| 15 <sup>c</sup> |  , Me <sub>3</sub> SiCN | 20                          | <b>2b</b> : 9       | <b>6b</b> : 0 <sup>d</sup> |

<sup>a</sup> Reaction conditions: The selected oxidizing agent (0.30 mmol) was added in one solid portion to a solution of aldimine **1a** (0.30 mmol) and Cu(OPiv)<sub>2</sub> (16 mg, 0.06 mmol, 20 mol%) in CH<sub>3</sub>CN (4 mL). The reaction mixture was heated to 100 °C for 10 min under microwave irradiation (max. 200 W). Na<sub>2</sub>S (14 mg, 0.18 mmol) was then added and the crude reaction mixture was stirred for 20 min under ultrasonic irradiation. The crude was then filtered through a 0.20 μm PTFE filter and solids were rinsed with CH<sub>2</sub>Cl<sub>2</sub> (5 × 5 mL) and the solvent was removed under reduced pressure. Conversions and yields were determined by <sup>19</sup>F NMR with 4-fluorotoluene as standard. <sup>b</sup> The reaction of aldimine **1a** (0.30 mmol) and of Cu(OPiv)<sub>2</sub> (16 mg, 0.06 mmol, 20 mol%) in CH<sub>3</sub>CN (4 mL) was carried out in a Fisher-Porter bottle under atmospheric pressure and standard heating. <sup>c</sup> Reaction conditions: 1,4-benzoquinone (0.30 mmol) and Me<sub>3</sub>SiCN (0.30 mmol) were added to a solution of aldimine **1b** (0.30 mmol) and Cu(OPiv)<sub>2</sub> (16 mg, 0.06 mmol, 20 mol%) in CH<sub>3</sub>CN (4 mL). The reaction mixture was heated to 100 °C for 10 min under microwave irradiation (max. 200 W). <sup>d</sup> A cyanated by-product of m/z 317 could be detected in low yield (<5%) by GC-MS.

### C. Mechanistic insights for the copper-promoted formation of 2a and 6a.

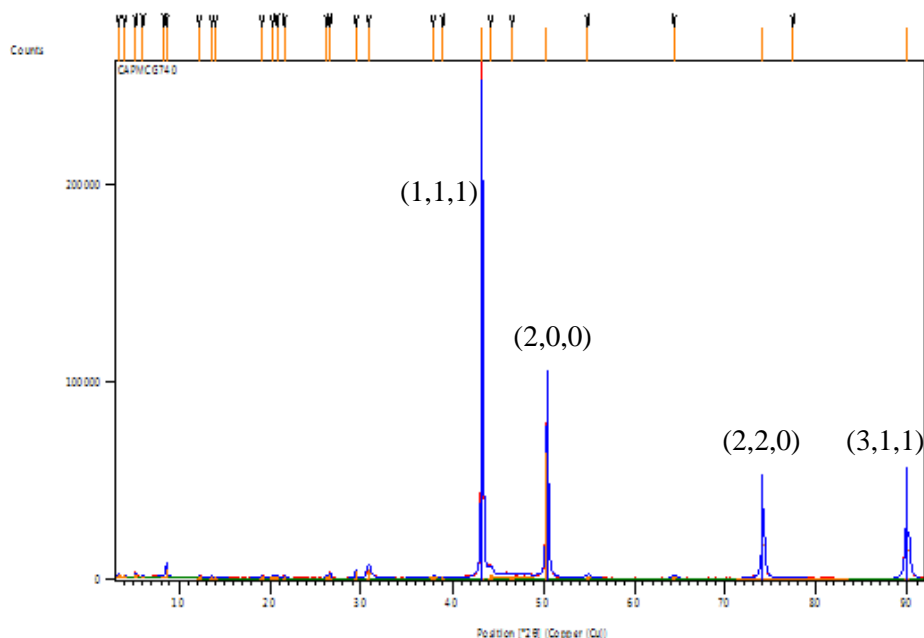

| Peak List | Pos.[°2θ] | Height [cts] | FWHMLeft[°2θ] | d-spacing [Å] | Rel. Int. [%] |
|-----------|-----------|--------------|---------------|---------------|---------------|
|           | 3.3896    | 951.39       | 0.4253        | 26.04479      | 0.43          |
|           | 4.0151    | 864.01       | 0.1267        | 21.98918      | 0.39          |
|           | 5.2255    | 1312.94      | 0.3203        | 16.89810      | 0.59          |
|           | 6.0427    | 983.18       | 0.1933        | 14.61447      | 0.44          |
|           | 8.3728    | 1007.27      | 0.8468        | 10.55186      | 0.45          |
|           | 8.5969    | 4496.64      | 0.0779        | 10.27724      | 2.01          |
|           | 12.1729   | 886.36       | 0.3768        | 7.26497       | 0.40          |
|           | 13.5832   | 663.49       | 0.1090        | 6.51370       | 0.30          |
|           | 13.9607   | 463.70       | 0.1167        | 6.33839       | 0.21          |
|           | 19.1157   | 466.99       | 0.5698        | 4.63914       | 0.21          |
|           | 20.3073   | 581.81       | 0.6604        | 4.36953       | 0.26          |
|           | 20.7595   | 1087.34      | 0.1030        | 4.27537       | 0.49          |
|           | 21.5842   | 737.08       | 0.3504        | 4.11384       | 0.33          |
|           | 26.2190   | 766.97       | 0.3408        | 3.39619       | 0.34          |
|           | 26.5860   | 1968.25      | 0.1389        | 3.35014       | 0.88          |
|           | 29.4255   | 3458.15      | 0.1059        | 3.03299       | 1.55          |
|           | 30.8344   | 4512.27      | 0.5439        | 2.89755       | 2.02          |
|           | 37.9203   | 600.76       | 0.8641        | 2.37080       | 0.27          |
|           | 38.9858   | 494.60       | 0.0474        | 2.30843       | 0.22          |
|           | 43.2688   | 223391.20    | 0.1443        | 2.08933       | 100.00        |
|           | 44.2048   | 2395.00      | 0.5090        | 2.04724       | 1.07          |
|           | 46.5645   | 1623.52      | 4.8301        | 1.94884       | 0.73          |
|           | 50.3985   | 63495.20     | 0.2287        | 1.80920       | 28.42         |
|           | 54.8642   | 1349.47      | 0.6942        | 1.67203       | 0.60          |
|           | 64.3423   | 861.03       | 0.6729        | 1.44671       | 0.39          |
|           | 74.0851   | 33528.36     | 0.2377        | 1.27870       | 15.01         |
|           | 77.4293   | 297.37       | 12.3809       | 1.23161       | 0.13          |
|           | 89.8933   | 28674.04     | 0.3293        | 1.09038       | 12.84         |

| Pattern List | Visible | Ref.Code    | Score | Compound Name | Displ.[°2θ] | Scale Fac. | Chem. Formula |
|--------------|---------|-------------|-------|---------------|-------------|------------|---------------|
| *            |         | 96-901-2044 | 35    | Copper        | 0.000       | 0.697      | Cu4.00        |

**Figure S5.** PXRD diffractogram of Cu at solid state isolated after **2a** synthesis (blue peaks. The sharp blue lines correspond to the diffraction pattern of bulk face-centered cubic Cu(0) structure with the corresponding crystallographic plane assignments.

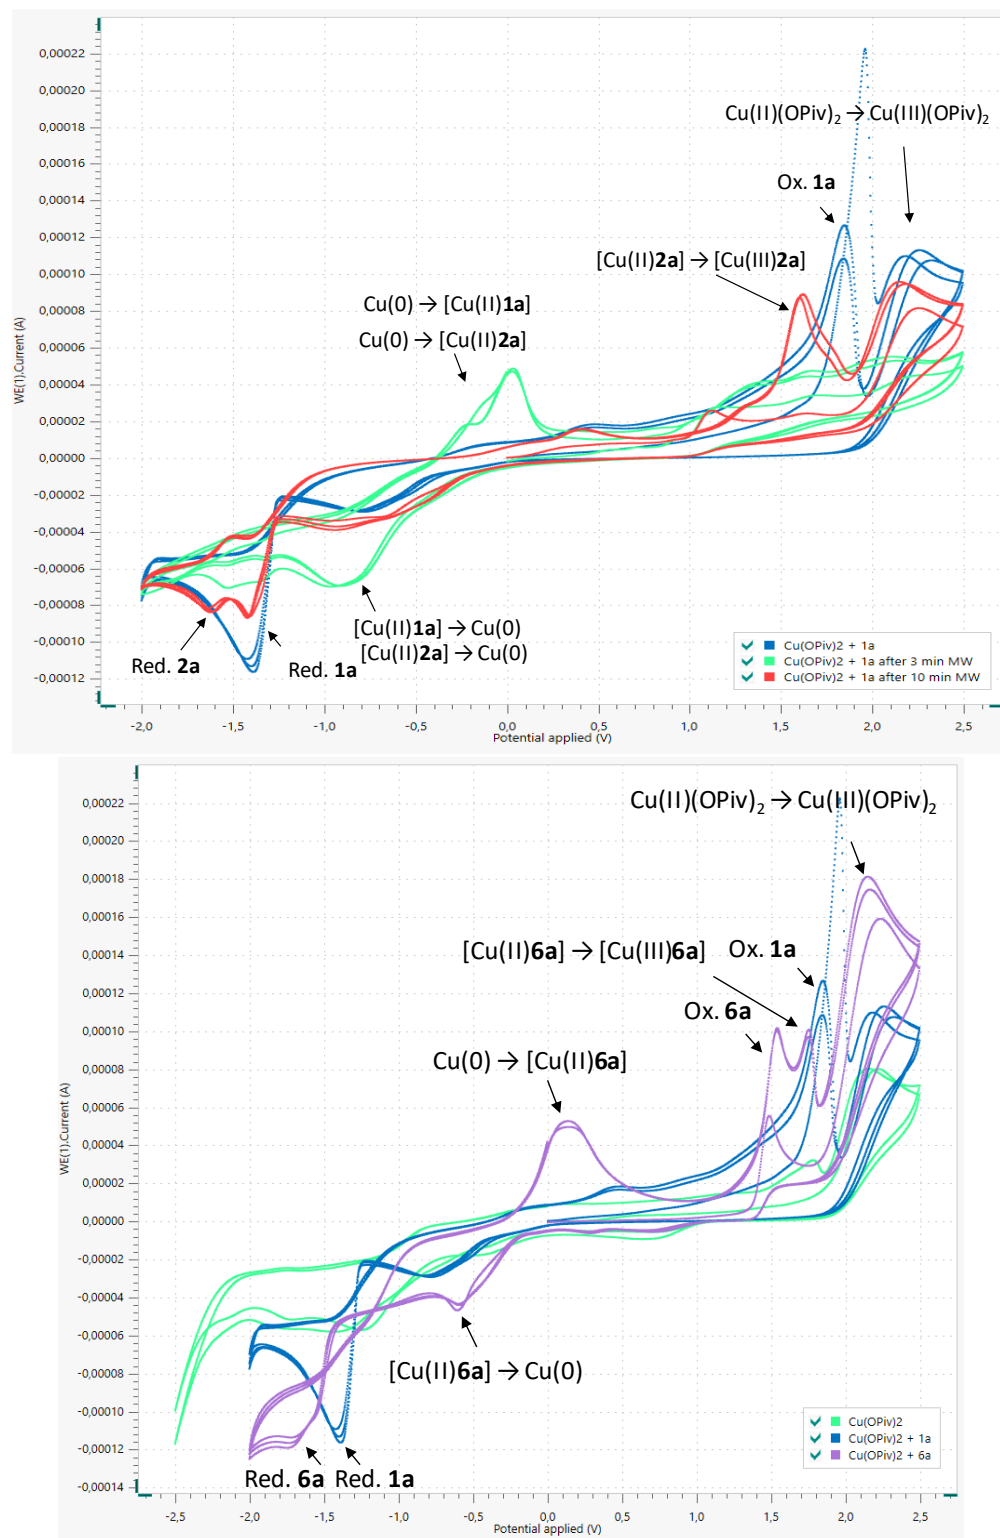

**Figure S6.** Stacked cyclic voltammograms. TOP: monitoring of Cu(OPiv)<sub>2</sub> and **1a** in CH<sub>3</sub>CN at t<sub>0</sub> (blue), 3 min (green), and 10 min (red). BOTTOM: TOP: Control voltammograms of Cu(OPiv)<sub>2</sub> (green), a mixture of Cu(OPiv)<sub>2</sub> and **1a** (blue) and a mixture of Cu(OPiv)<sub>2</sub> and **6a** (violet) in CH<sub>3</sub>CN. For Cu(OAc)<sub>2</sub> and its amine-based complexes, see G. Panzeri, R. Dell'Oro, V. Trifiletti, J. Parravicini, M. Acciarri, S. Binetti, L. Magagnin, *Electrochem. Commun.* **2019**, *109*, 106580.

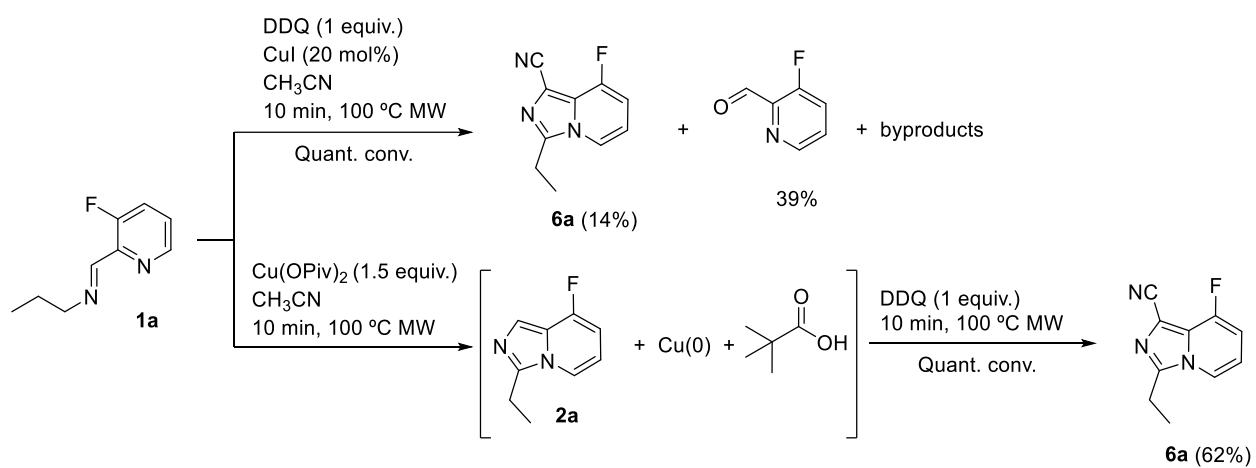**Scheme S2.** Cyanation control studies with DDQ.

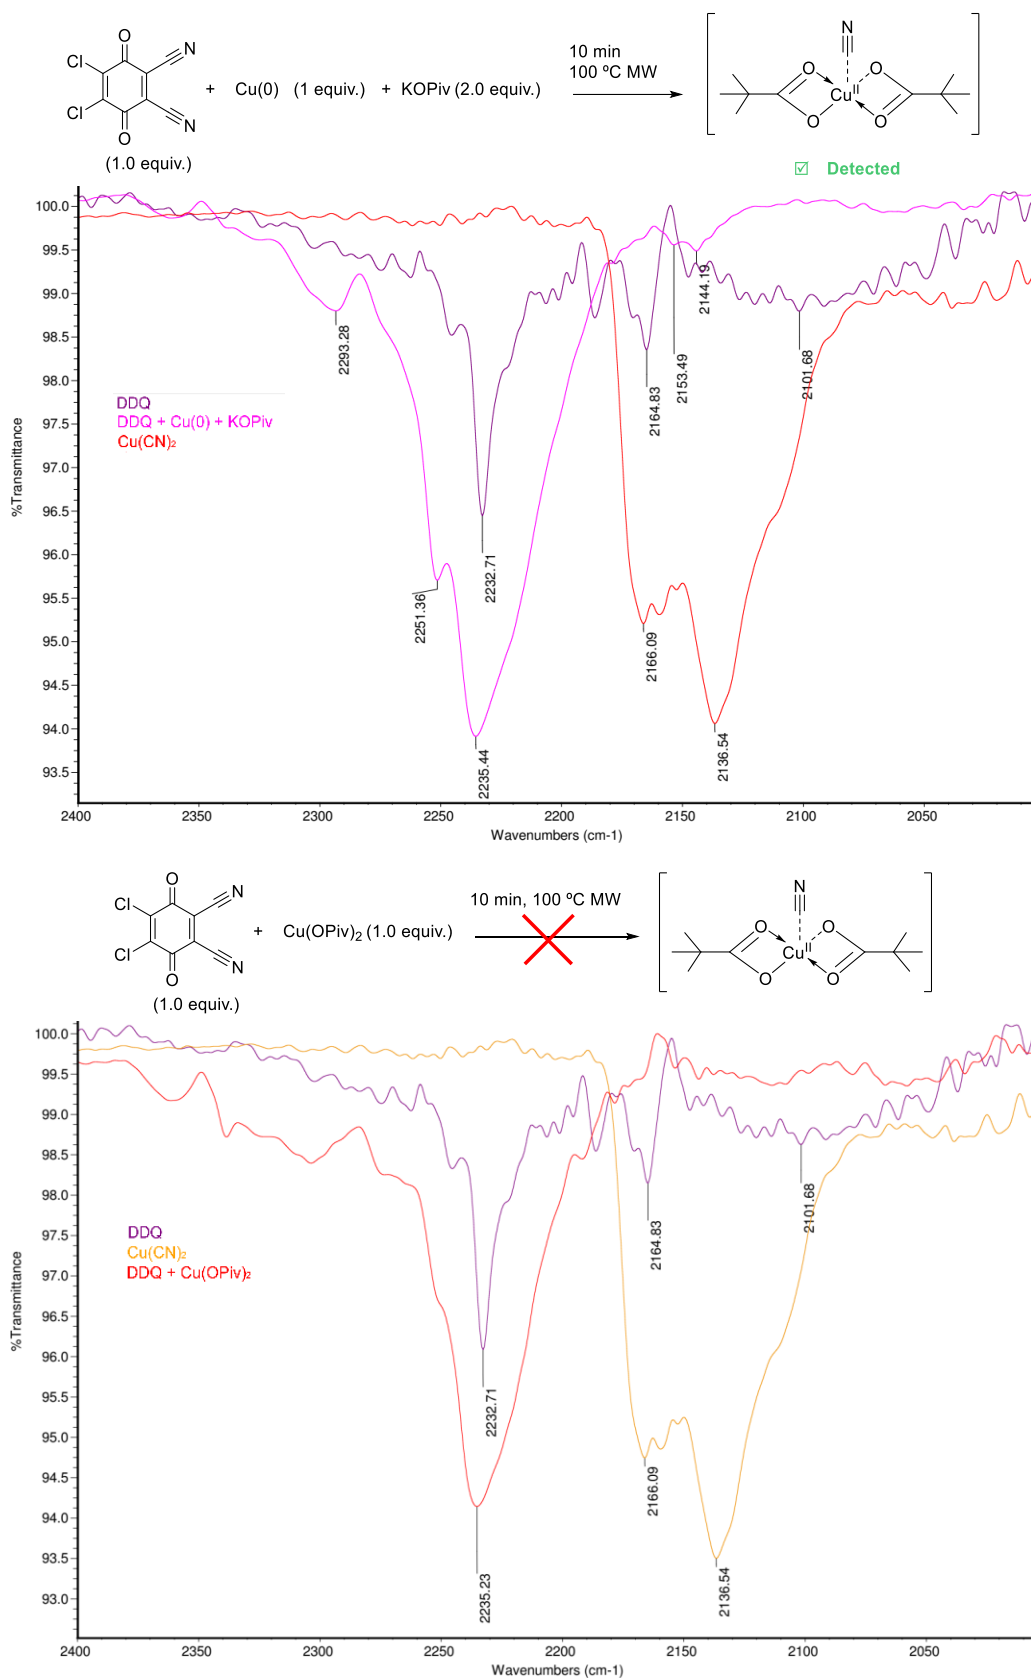

**Figure S7.** Formation of copper cyanide species from DDQ and copper sources. Top: Reaction control with Cu(0) and KOPIv. Bottom: Reaction control with Cu(OPiv)<sub>2</sub>.



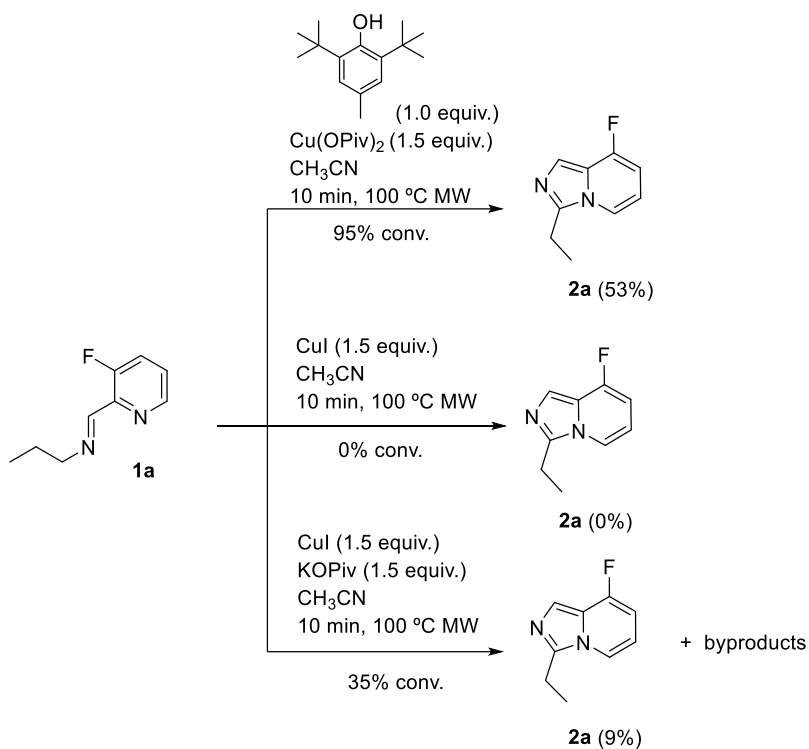

**Scheme S3.** Stoichiometric control studies with  $\text{Cu(OPiv)}_2$  for the formation of **2a** in the presence of a radical inhibitor and control studies with  $\text{CuI}$ .

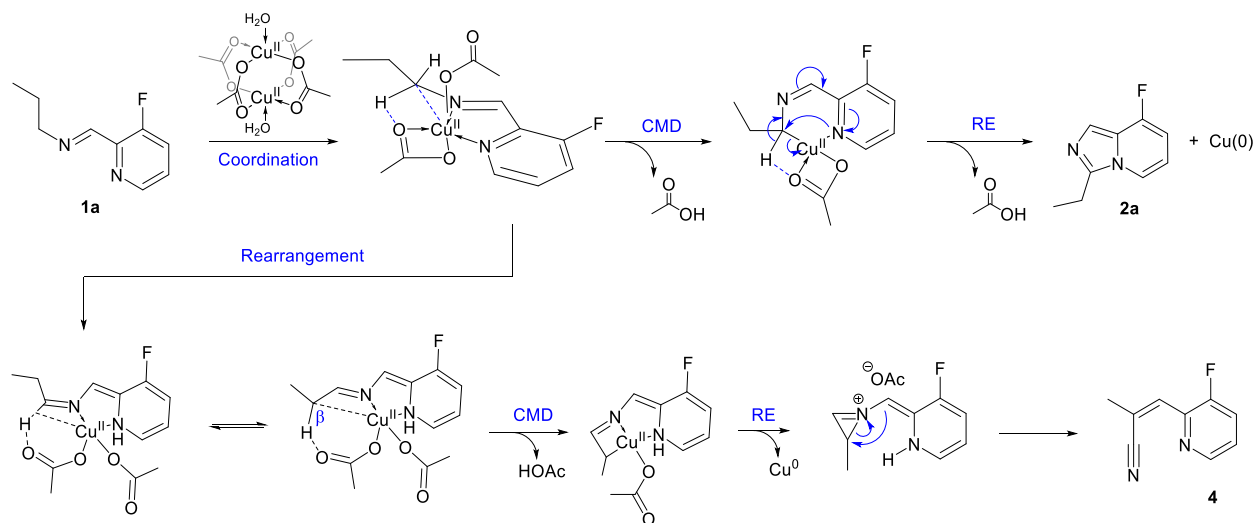

**Scheme S4.** A plausible reaction mechanism for the synthesis of **2a** and **4** via multiple  $\text{Cu(II)}$ -mediated C-H bond functionalizations.

**D. Synthesis and characterization of compounds.**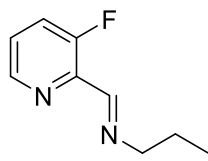

**1-(3-Fluoropyridin-2-yl)-N-propylmethanimine (1a).** Following the general procedure for the synthesis of aldimines and starting with propylamine (0.66 mL, 8.00 mmol), **1a** was obtained as a yellow oil (1.28 g, 96%) which was used

without further purification. **IR** ( $\nu$  in  $\text{cm}^{-1}$ ) 2962, 1649, 1446, 803.  **$^1\text{H}$  NMR** (300 MHz,  $\text{CDCl}_3$ )  $\delta_{\text{ppm}}$  8.55 (s, 1H), 8.48 (dt,  $J = 4.5, 1.5$  Hz, 1H), 7.42 (ddd,  $J = 10.1, 8.4, 1.4$  Hz, 1H), 3.65 (t,  $J = 7.0, 2\text{H}$ ), 1.76 (tq,  $J = 7.4, 7.0$  Hz, 2H), 0.91 (t,  $J = 7.4$  Hz, 3H).  **$^{13}\text{C}$  NMR** (75.5 MHz,  $\text{CDCl}_3$ )  $\delta_{\text{ppm}}$  159.2 (d,  $J_{\text{C-F}} = 265.3$  Hz), 155.3 (d,  $J_{\text{C-F}} = 3.0$  Hz), 146.0 (d,  $J_{\text{C-F}} = 5.1$  Hz), 141.8 (d,  $J_{\text{C-F}} = 8.1$  Hz), 125.9 (d,  $J_{\text{C-F}} = 4.3$  Hz), 124.2 (d,  $J_{\text{C-F}} = 18.9$  Hz), 64.5, 23.7, 11.8.  **$^{19}\text{F}\{^1\text{H}\}$  NMR** (282 MHz,  $\text{CDCl}_3$ )  $\delta_{\text{ppm}}$  -126.5. **HRMS** (DCI- $\text{CH}_4$ )  $[\text{M}+\text{H}]^+$  calculated for  $\text{C}_9\text{H}_{12}\text{N}_2\text{F}$   $m/z$  167.0985, found  $m/z$  167.0985.

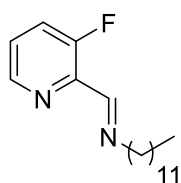

**1-(3-Fluoropyridin-2-yl)-N-dodecylmethanimine (1b).**

Following the general procedure for the synthesis of aldimines and starting with dodecylamine (1.4828 g, 8.00 mmol), **1b** was obtained as a yellow oil (2.2925 g,

98%) which was used without further purification. **IR** ( $\nu$  in  $\text{cm}^{-1}$ ) 2922, 2852, 1649, 1449, 803.  **$^1\text{H}$  NMR** (300 MHz,  $\text{CDCl}_3$ )  $\delta_{\text{ppm}}$  8.59 (s, 1H), 8.55 – 8.50 (m, 1H), 7.46 (m, 1H), 7.33 (m, 1H), 3.72 (t,  $J = 7.1$  Hz, 2H), 1.77 (p,  $J = 7.1$  Hz, 2H), 1.44 – 1.15 (m, 18H), 0.90 – 0.82 (t,  $J = 6.83$  Hz, 3H).  **$^{13}\text{C}$  NMR** (75 MHz,  $\text{CDCl}_3$ )  $\delta_{\text{ppm}}$  159.3 (d,  $J_{\text{C-F}} = 265.3$  Hz), 155.4 (d,  $J_{\text{C-F}} = 3.1$  Hz), 146.2 (d,  $J_{\text{C-F}} = 5.3$  Hz), 142.0 (d,  $J_{\text{C-F}} = 8.2$  Hz), 126.0 (d,  $J_{\text{C-F}} = 4.3$  Hz), 124.3 (d,  $J_{\text{C-F}} = 18.9$  Hz), 62.9, 32.0, 30.7, 29.7, 29.6 (2 signals), 29.6, 29.5 (2 signals), 27.5, 22.8, 14.2.  **$^{19}\text{F}\{^1\text{H}\}$  NMR** (282 MHz,  $\text{CDCl}_3$ )  $\delta_{\text{ppm}}$  -126.4. **HRMS** (DCI- $\text{CH}_4$ )  $[\text{M}+\text{H}]^+$  calculated for  $\text{C}_{18}\text{H}_{30}\text{N}_2\text{F}$   $m/z$  293.2393, found  $m/z$  293.2397. **Elemental Analysis** calcd. for  $\text{C}_{18}\text{H}_{30}\text{N}_2\text{F}$ , C: 73.93, H: 10.00, N: 9.58; found, C: 73.62, H: 10.37, N: 9.56.

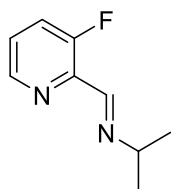

**1-(3-Fluoropyridin-2-yl)-N-isopropylmethanimine (1c).** Following the general procedure for the synthesis of aldimines and starting with isopropylamine (0.65 mL, 8.00 mmol), **1c** was obtained as a yellow oil (1.2630 g, 95%) which was used without further purification. **IR** ( $\nu$  in  $\text{cm}^{-1}$ ) 2971, 1646, 1444, 804, 751.  **$^1\text{H}$  NMR** (300 MHz,  $\text{CD}_3\text{CN}$ )  $\delta$  8.51 (d,  $J = 0.7$  Hz, 1H), 8.47 (dt,  $J = 4.5, 1.5$  Hz, 1H), 7.57 (ddd,  $J = 10.9, 8.4, 1.3$  Hz, 1H), 7.42 (dt,  $J = 8.5, 4.3$  Hz, 1H), 3.59 (dtt,  $J = 12.6, 6.2, 0.9$  Hz, 1H), 1.23 (d,  $J = 6.3$  Hz, 6H).  **$^{13}\text{C}$  NMR** (75 MHz,  $\text{CD}_3\text{CN}$ )  $\delta$  159.8 (d,  $J_{\text{C-F}} = 265.1$  Hz), 155.7 (d,  $J_{\text{C-F}} = 5.0$  Hz), 146.6 (d,  $J_{\text{C-F}} = 5.1$  Hz), 143.2 (d,  $J_{\text{C-F}} = 7.8$  Hz), 127.1 (d,  $J_{\text{C-F}} = 4.6$  Hz), 125.5 (d,  $J_{\text{C-F}} = 19.0$  Hz), 63.3, 24.3.  **$^{19}\text{F}\{^1\text{H}\}$  NMR** (282 MHz,  $\text{CD}_3\text{CN}$ )  $\delta_{\text{ppm}}$  -125.4. **HRMS** (DCI- $\text{CH}_4$ ):  $[\text{M}+\text{H}]^+$  calculated for  $\text{C}_9\text{H}_{12}\text{N}_2\text{F}$   $m/z$  167.0985, found  $m/z$  167.0990.

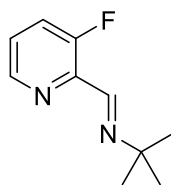

**1-(3-Fluoropyridin-2-yl)-N-tert-pentylmethanimine (1d).** Following the general procedure for the synthesis of aldimines and starting with *tert*-pentylamine (0.79 mL, 8.00 mmol), **1d** was obtained as a yellow oil (1.4762 g, 95%) which was used without further purification. **IR** ( $\nu$  in  $\text{cm}^{-1}$ ) 2967, 1646, 1446, 1179, 803.  **$^1\text{H}$  NMR** (300.0 MHz,  $\text{CDCl}_3$ )  $\delta_{\text{ppm}}$  8.59 – 8.48 (m, 2H), 7.45 (m, 1H), 7.31 (m, 1H), 1.71 (q,  $J = 7.5$  Hz, 2H), 1.29 (s, 6H), 0.83 (t,  $J = 7.5$  Hz, 3H).  **$^{13}\text{C}$  NMR** (75.5 MHz,  $\text{CDCl}_3$ )  $\delta_{\text{ppm}}$  159.4 (d,  $J_{\text{C-F}} = 264.7$  Hz), 150.7 (d,  $J_{\text{C-F}} = 2.6$  Hz), 146.2 (d,  $J_{\text{C-F}} = 5.3$  Hz), 142.8 (d,  $J_{\text{C-F}} = 7.9$  Hz), 125.7 (d,  $J_{\text{C-F}} = 4.3$  Hz), 124.3 (d,  $J_{\text{C-F}} = 18.9$  Hz), 61.5, 35.5, 26.6, 8.8.  **$^{19}\text{F}\{^1\text{H}\}$  NMR** (282 MHz,  $\text{CDCl}_3$ )  $\delta_{\text{ppm}}$  -126.8. **HRMS** (DCI- $\text{CH}_4$ )  $[\text{M}+\text{H}]^+$  calculated for  $\text{C}_{11}\text{H}_{15}\text{N}_2\text{F}$   $m/z$  195.1298, found  $m/z$  195.1299.

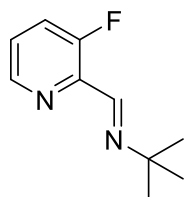

**1-(3-Fluoropyridin-2-yl)-N-tert-butylmethanimine (1e).** Following the general procedure for the synthesis of aldimines and starting with tert-butylamine (0.84 mL, 8.00 mmol), **1e** was obtained as a yellow oil (1.4415 g, 99%) which was used

without further purification. **IR** ( $\nu$  in  $\text{cm}^{-1}$ ) 2969, 1651, 1285, 1263, 1250, 1226, 1211, 1181, 1158, 804.  **$^1\text{H NMR}$**  (300 MHz,  $\text{CDCl}_3$ )  $\delta_{\text{ppm}}$  8.60 (s, 1H), 8.54 (m, 1H), 7.44 (m, 1H), 7.36 – 7.27 (m, 1H), 1.34 (s, 9H).  **$^{13}\text{C NMR}$**  (75 MHz,  $\text{CDCl}_3$ )  $\delta_{\text{ppm}}$  159.5 (d,  $J_{\text{C-F}} = 264.4$  Hz), 150.1 (d,  $J_{\text{C-F}} = 2.3$  Hz), 146.2 (d,  $J_{\text{C-F}} = 5.3$  Hz), 142.6 (d,  $J_{\text{C-F}} = 7.9$  Hz), 125.8 (d,  $J_{\text{C-F}} = 4.3$  Hz), 124.2 (d,  $J_{\text{C-F}} = 18.9$  Hz), 58.9, 29.7.  **$^{19}\text{F}\{^1\text{H}\}$  NMR** (282 MHz,  $\text{CDCl}_3$ )  $\delta_{\text{ppm}}$  -127.1. **HRMS** (DCI- $\text{CH}_4$ ):  $[\text{M}+\text{H}]^+$  calculated for  $\text{C}_{10}\text{H}_{14}\text{N}_2\text{F}$   $m/z$  181.1141, found  $m/z$  181.1142.

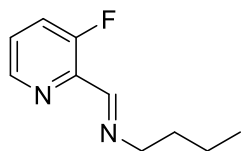

**1-(3-Fluoropyridin-2-yl)-N-butylmethanimine (1f).** Following the general procedure for the synthesis of aldimines and starting with n-butylamine (0.79 mL, 8.00 mmol), **1f** was obtained as a yellow oil (1.4416 g, 99%) which was

used without further purification. **IR** ( $\nu$  in  $\text{cm}^{-1}$ ) 2958, 1648, 1450, 804.  **$^1\text{H NMR}$**  (300.0 MHz,  $\text{CDCl}_3$ )  $\delta_{\text{ppm}}$  8.57 (s, 1H), 8.50 (m, 1H), 7.44 (m, 1H), 7.31 (m, 1H), 3.70 (t,  $J = 7.1$  Hz, 2H), 1.74 (p,  $J = 7.2$  Hz, 2H), 1.36 (h,  $J = 7.4$  Hz, 2H), 0.91 (t,  $J = 7.4$  Hz, 3H).  **$^{13}\text{C NMR}$**  (75 MHz,  $\text{CDCl}_3$ )  $\delta_{\text{ppm}}$  159.3 (d,  $J_{\text{C-F}} = 265.3$  Hz), 155.3 (d,  $J_{\text{C-F}} = 3.1$  Hz), 146.1 (d,  $J_{\text{C-F}} = 5.3$  Hz), 141.9 (d,  $J_{\text{C-F}} = 8.3$  Hz), 125.9 (d,  $J_{\text{C-F}} = 4.4$  Hz), 124.3 (d,  $J_{\text{C-F}} = 18.9$  Hz), 62.5, 32.7, 20.5, 13.9.  **$^{19}\text{F}\{^1\text{H}\}$  NMR** (282 MHz,  $\text{CDCl}_3$ )  $\delta_{\text{ppm}}$  -126.4. **HRMS** (DCI- $\text{CH}_4$ )  $[\text{M}+\text{H}]^+$  calculated for  $\text{C}_{10}\text{H}_{14}\text{N}_2\text{F}$   $m/z$  181.1141, found  $m/z$  181.1137.

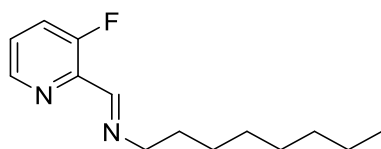

**1-(3-Fluoropyridin-2-yl)-N-octylmethanimine (1g).** Following

the general procedure for the synthesis of aldimines and starting with n-octylamine (1.32 mL, 8.00

mmol), **1g** was obtained as a yellow oil (1.8906 g, 99%) which was used without further purification. **IR** ( $\nu$  in  $\text{cm}^{-1}$ ) 2954, 2854, 1648, 1592, 1571, 1510, 1450, 1377, 1335, 1261, 1232, 1184, 1158, 1107, 803.  **$^1\text{H}$  NMR** (300.0 MHz,  $\text{CDCl}_3$ )  $\delta_{\text{ppm}}$  8.57 (s, 1H), 8.50 (m, 1H), 7.44 (m, 1H), 7.31 (m, 1H), 3.70 (t,  $J = 7.1$  Hz, 2H), 1.76 -1.30 (m, 12H), 0.91 (t,  $J = 7.4$  Hz, 3H).  **$^{13}\text{C}$  NMR** (75 MHz,  $\text{CDCl}_3$ ):  $\delta_{\text{ppm}}$  159.2 (d,  $J_{\text{C-F}} = 265.4$  Hz), 155.3 (d,  $J_{\text{C-F}} = 3.1$  Hz), 146.1 (d,  $J_{\text{C-F}} = 5.2$  Hz), 141.9 (d,  $J_{\text{C-F}} = 8.2$  Hz), 125.9 (d,  $J_{\text{C-F}} = 4.3$  Hz), 124.3 (d,  $J_{\text{C-F}} = 18.8$  Hz), 62.8, 31.9, 30.6, 29.4, 29.3, 27.4, 22.7, 14.1.  **$^{19}\text{F}\{^1\text{H}\}$  NMR** (282 MHz,  $\text{CDCl}_3$ )  $\delta_{\text{ppm}}$  -126.4. **HRMS** (DCI- $\text{CH}_4$ )  $[\text{M}+\text{H}]^+$  calculated for  $\text{C}_{14}\text{H}_{22}\text{N}_2\text{F}$   $m/z$  237.1767, found  $m/z$  237.1764.

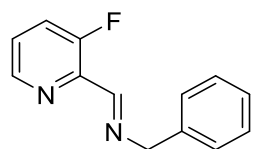

**1-(3-Fluoropyridin-2-yl)-N-benzylmethanimine (1h)**. Following the general procedure for the synthesis of aldimines and starting with benzylamine (0.87 mL, 8.00 mmol), **1h** was obtained as a yellow oil (1.6454 g, 96%) which was used without further purification. **IR** ( $\nu$  in  $\text{cm}^{-1}$ ) 3021, 2840, 1644, 1447, 800.  **$^1\text{H}$  NMR** (300 MHz,  $\text{CD}_3\text{CN}$ )  $\delta_{\text{ppm}}$  8.63 (t,  $J = 1.5$  Hz, 1H), 8.49 (dt,  $J = 4.5, 1.5$  Hz, 1H), 7.59 (ddd,  $J = 10.9, 8.4, 1.3$  Hz, 1H), 7.44 (dt,  $J = 8.5, 4.3$  Hz, 1H), 7.39-7.29 (m, 5H), 4.86 (s, 2H).  **$^{13}\text{C}$  NMR** (75 MHz,  $\text{CD}_3\text{CN}$ )  $\delta_{\text{ppm}}$  159.5 (d,  $J_{\text{C-F}} = 265.8$  Hz), 159.5 (d,  $J_{\text{C-F}} = 5.5$  Hz), 146.6 (d,  $J_{\text{C-F}} = 5.2$  Hz), 140.3, 129.6, 129.3 (d,  $J_{\text{C-F}} = 24.4$  Hz), 128.9, 128.0, 127.3 (d,  $J_{\text{C-F}} = 4.8$  Hz), 125.6 (d,  $J_{\text{C-F}} = 19.1$  Hz), 66.5.  **$^{19}\text{F}\{^1\text{H}\}$  NMR** (282 MHz,  $\text{CDCl}_3$ )  $\delta_{\text{ppm}}$  -124.7. **HRMS** (DCI- $\text{CH}_4$ )  $[\text{M}+\text{H}]^+$  calculated for  $\text{C}_{13}\text{H}_{12}\text{N}_2\text{F}$   $m/z$  215.0985, found  $m/z$  215.0988.

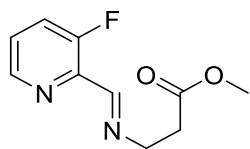

**Methyl 3-(((3-fluoropyridin-2-yl)methylene)amino)propanoate (1i).**

Following the general procedure for the synthesis of aldimines and starting with methyl 3-aminopropionate hydrochloride (1.2283 g, 8.8 mmol) and triethylamine (1.34 mL, 12.00 mmol), **1i** was obtained as a yellow oil (1.4961 g, 89%) which was used without further purification. **IR** ( $\nu$  in  $\text{cm}^{-1}$ ) 1736, 1649, 1450, 1262, 1175, 809.  **$^1\text{H}$  NMR** (300 MHz,  $\text{CD}_3\text{CN}$ )  $\delta_{\text{ppm}}$  8.53 (s, 1H), 8.48 (dt,  $J = 4.5, 1.5$  Hz, 1H), 7.58 (ddd,  $J = 10.9, 8.5, 1.3$  Hz, 1H), 7.44 (dt,  $J = 8.5, 4.3$  Hz, 1H), 3.89 (t,  $J = 6.7$  Hz, 2H), 3.62 (s, 3H), 2.70 (t,  $J = 6.7$  Hz, 2H).  **$^{13}\text{C}$  NMR** (75 MHz,  $\text{CD}_3\text{CN}$ )  $\delta_{\text{ppm}}$  173.1, 159.9 (d,  $J_{\text{C-F}} = 265.6$  Hz), 159.6 (d,  $J_{\text{C-F}} = 5.0$  Hz), 146.6 (d,  $J_{\text{C-F}} = 5.1$  Hz), 142.7 (d,  $J_{\text{C-F}} = 7.9$  Hz), 127.4, 125.5 (d,  $J_{\text{C-F}} = 18.9$  Hz), 58.1, 52.0, 35.7.  **$^{19}\text{F}\{^1\text{H}\}$  NMR** (282 MHz,  $\text{CD}_3\text{CN}$ )  $\delta_{\text{ppm}}$  -125.2. **HRMS** (DCI- $\text{CH}_4$ ) calculated for  $\text{C}_{10}\text{H}_{12}\text{N}_2\text{O}_2\text{F}$   $m/z$  211.0883 found 211.0885.

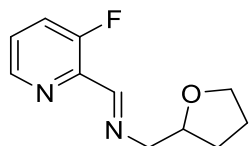

**1-(3-Fluoropyridin-2-yl)-N-tetrahydrofurfuryl-methanimine (1j).**

Following the general procedure for the synthesis of aldimines and starting with tetrahydrofurfurylamine (0.83 mL, 8.00 mmol), **1j** was obtained as a yellow oil (1.5660 g, 94%) which was used without further purification.

**IR** ( $\nu$  in  $\text{cm}^{-1}$ ) 2865, 1647, 1446, 1068, 806.  **$^1\text{H}$  NMR** (300 MHz,  $\text{CD}_3\text{CN}$ )  $\delta_{\text{ppm}}$  8.53-8.50 (m, 2H), 7.63 (ddd,  $J = 10.9, 8.4, 1.3$  Hz, 1H), 7.48 (dt,  $J = 8.5, 4.3$  Hz, 1H), 4.19 (qd,  $J = 6.8, 4.6$  Hz, 1H), 3.88 – 3.78 (m, 2H), 3.76 – 3.65 (m, 2H), 1.98 – 1.65 (m, 4H).  **$^{13}\text{C}$  NMR** (75 MHz,  $\text{CD}_3\text{CN}$ )  $\delta_{\text{ppm}}$  159.8 (d,  $J_{\text{C-F}} = 265.8$  Hz), 159.7 (d,  $J_{\text{C-F}} = 5.3$  Hz), 146.6 (d,  $J_{\text{C-F}} = 5.2$  Hz), 127.2 (d,  $J_{\text{C-F}} = 4.7$  Hz), 125.6 (d,  $J_{\text{C-F}} = 19.1$  Hz), 79.0, 68.5, 67.4, 30.0, 26.4.  **$^{19}\text{F}\{^1\text{H}\}$  NMR** (282 MHz,  $\text{CD}_3\text{CN}$ )  $\delta_{\text{ppm}}$  -125.7. **HRMS** (ESI)  $[\text{M}+\text{H}]^+$  calculated for  $\text{C}_{11}\text{H}_{14}\text{N}_2\text{OF}$   $m/z$  209.1085, found  $m/z$  209.1086.

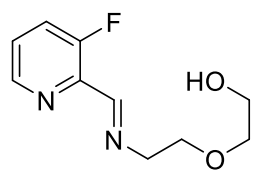

**2-(2-(((3-Fluoropyridin-2-yl)methylene)amino)ethoxy)ethanol (1k).**

Following the general procedure for the synthesis of aldimines and starting with 2-(2-aminoethoxy)ethanol (0.82 mL, 8.00 mmol), **1k** was obtained as a yellow oil (1.5618 g, 92%) which was used without further purification.

**IR** ( $\nu$  in  $\text{cm}^{-1}$ ) 3379, 2861, 1651, 1448, 1121, 1060, 806.  **$^1\text{H NMR}$**  (300 MHz,  $\text{CD}_3\text{CN}$ )  $\delta_{\text{ppm}}$  8.51 (t,  $J = 1.4$  Hz, 1H), 8.48 (dt,  $J = 4.5, 1.5$  Hz, 1H), 7.59 (ddd,  $J = 10.9, 8.4, 1.3$  Hz, 1H), 7.44 (dt,  $J = 8.5, 4.3$  Hz, 1H), 3.87 – 3.79 (m, 2H), 3.79 – 3.70 (m, 2H), 3.61 – 3.53 (m, 2H), 3.53 – 3.46 (m, 2H).  **$^{13}\text{C NMR}$**  (75 MHz,  $\text{CD}_3\text{CN}$ )  $\delta_{\text{ppm}}$  158.9 (d,  $J_{\text{C-F}} = 263.1$  Hz), 159.8 (d,  $J_{\text{C-F}} = 5.1$  Hz), 146.6 (d,  $J_{\text{C-F}} = 5.2$  Hz), 127.3 (d,  $J_{\text{C-F}} = 4.7$  Hz), 125.7, 125.5, 73.1, 70.9, 62.5, 61.9.  **$^{19}\text{F}\{^1\text{H}\}$  NMR** (282 MHz,  $\text{CD}_3\text{CN}$ )  $\delta_{\text{ppm}}$  -125.2. **HRMS** (ESI)  $[\text{M}+\text{H}]^+$  calculated for  $\text{C}_{10}\text{H}_{13}\text{N}_2\text{O}_2\text{F}$   $m/z$  213.1034, found  $m/z$  213.1039.

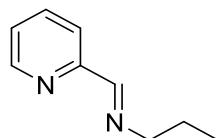

***N*-propyl-1-(pyridin-2-yl)methanimine (1a').** Following the general

procedure for the synthesis of aldimines and starting with propylamine (0.66 mL, 8.00 mmol) and replacing the aldehyde by picolinaldehyde (0.8569 g, 8.00 mmol), **1a'** was obtained as a yellow oil (1.1140 g, 94%) which was used without further purification. **IR** ( $\nu$  in  $\text{cm}^{-1}$ ) 2962, 2930, 2874, 2834, 1650, 1587, 1567, 1468, 1436, 970, 772.  **$^1\text{H NMR}$**  (300 MHz,  $\text{CD}_3\text{CN}$ )  $\delta$  8.60 (ddd,  $J = 4.8, 1.8, 1.0$  Hz, 1H), 8.33 (d,  $J = 0.9$  Hz, 1H), 8.00 – 7.90 (m, 1H), 7.85 – 7.72 (m, 1H), 7.36 (ddd,  $J = 7.5, 4.8, 1.3$  Hz, 1H), 3.60 (td,  $J = 6.9, 1.4$  Hz, 2H), 1.69 (h,  $J = 7.2$  Hz, 2H), 0.94 (t,  $J = 7.4$  Hz, 3H).  **$^{13}\text{C NMR}$**  (75 MHz,  $\text{CD}_3\text{CN}$ )  $\delta$  162.7, 155.9, 150.4, 137.6, 125.7, 121.3, 63.6, 24.7, 12.1. **HRMS** (DCI- $\text{CH}_4$ ):  $[\text{M}+\text{H}]^+$  calculated for  $\text{C}_9\text{H}_{13}\text{N}_2$   $m/z$  149.1079, found  $m/z$  149.1085.

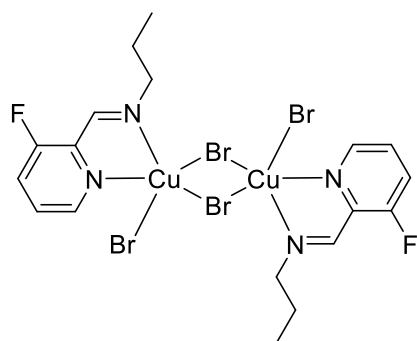

**Complex CuBr<sub>2</sub>-propylimine (CuA).** Following the general procedure for the synthesis of CuBr<sub>2</sub>-aldimine complexes and starting from 1-(3-fluoropyridin-2-yl)-*N*-propylmethanimine (**1a**) (200.0 mg, 1.20 mmol), **CuA** was obtained as a dark red powder (459.1 mg, 99%). **IR** ( $\nu$  in cm<sup>-1</sup>) 3675, 2988, 2900, 1638, 1604, 1582, 1459, 1248, 1119, 1065, 806. **<sup>1</sup>H NMR** (300 MHz, CD<sub>2</sub>Cl<sub>2</sub>)  $\delta_{\text{ppm}}$  7.01 (br), 2.76 (br), 1.27 (br), 0.88 (br). **MS** (DCI-CH<sub>4</sub>) [M-Br<sup>-</sup>]<sup>+</sup> *m/z* 698.8.

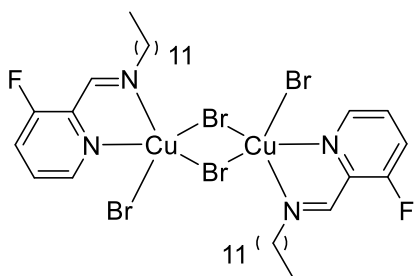

**Complex CuBr<sub>2</sub>-dodecylimine (CuB).** Following the general procedure for the synthesis of CuBr<sub>2</sub>-aldimine complexes and starting from 1-(3-fluoropyridin-2-yl)-*N*-dodecylmethanimine (**1b**) (351.0 mg, 1.20 mmol), the entitled product **CuB** (548.0 mg, 97%) was obtained as a red powder. **IR** ( $\nu$  in cm<sup>-1</sup>) 3041, 2921, 2852, 1645, 1458, 1288, 1242, 1117, 808. **MS** (DCI-CH<sub>4</sub>) *m/z* 951.1.

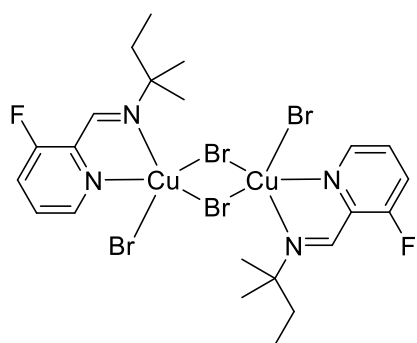

**Complex CuBr<sub>2</sub>-*tert*-pentylimine (CuC).** Following the general procedure for the synthesis of CuBr<sub>2</sub>-aldimine complexes and starting from 1-(3-fluoropyridin-2-yl)-*N*-*tert*-pentylmethanimine (**1d**) (233.1 mg, 1.20 mmol), the entitled product **CuC** (401.0 mg, 80%) was obtained as a red powder. **IR** ( $\nu$  in cm<sup>-1</sup>) 2969, 2925, 1627, 1596, 1577, 1455, 1286, 1251, 1121, 818. **MS** (DCI-CH<sub>4</sub>) *m/z* 833.8.



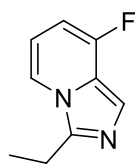

**3-Ethyl-8-fluoroimidazo[1,5-a]pyridine (2a).** Following the general procedure for stoichiometric C–H bond functionalization reactions with  $\text{Cu}(\text{OPiv})_2$  and starting with **1a** (50.0 mg, 0.30 mmol; scale-out in 4 reaction vessels). The reaction crude was treated with  $\text{Na}_2\text{S}$  (117.0 mg, 1.5 mmol) prior to the standard work-up. Column chromatography on neutral alumina and elution with pentane provided **2a** as a yellow oil (138.0 mg, 72%). **IR** ( $\nu$  in  $\text{cm}^{-1}$ ) 2963, 2932, 2875, 1649, 1556, 1450, 1243, 805.  **$^1\text{H}$  NMR** (300 MHz,  $\text{CDCl}_3$ )  $\delta_{\text{ppm}}$  7.52 (d,  $J = 7.0$  Hz, 1H), 7.47 (s, 1H), 6.47 (td,  $J = 7.0$  Hz; 5.0 Hz, 1H), 6.30 (dd,  $J = 10.3$  Hz; 7.2 Hz, 1H), 2.95 (q,  $J = 7.5$  Hz, 1H), 1.35 (t,  $J = 7.5$  Hz, 2H).  **$^{13}\text{C}$  NMR** (75 MHz,  $\text{CD}_3\text{CN}$ )  $\delta$  153.5 (d,  $J_{\text{C-F}} = 247.3$  Hz), 142.2, 123.2 (d,  $J_{\text{C-F}} = 39.0$  Hz), 118.0 (d,  $J_{\text{C-F}} = 4.5$  Hz), 115.7 (d,  $J_{\text{C-F}} = 4.2$  Hz), 111.1 (d,  $J_{\text{C-F}} = 7.3$  Hz), 99.9 (d,  $J_{\text{C-F}} = 17.4$  Hz), 26.9, 19.7.  **$^{19}\text{F}\{^1\text{H}\}$  NMR** (282 MHz,  $\text{CDCl}_3$ )  $\delta_{\text{ppm}}$  -123.6. **HRMS (ESI):**  $[\text{M}+\text{H}]^+$  calculated for  $\text{C}_9\text{H}_{10}\text{N}_2\text{F}$   $m/z$  164.0750, found  $m/z$  164.0741

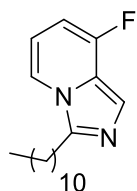

**3-Undecyl-8-fluoroimidazo[1,5-a]pyridine (2b).** Following the general procedure for stoichiometric C–H bond functionalization reactions with  $\text{Cu}(\text{OPiv})_2$  and starting with **1b** (88.3 mg, 0.30 mmol; scale-out in 3 reaction vessels). The reaction crude was treated with  $\text{Na}_2\text{S}$  (117.0 mg, 1.5 mmol) prior to the standard work-up. Column chromatography on neutral alumina and elution with pentane provided **2b** as a yellow oil (230.0 mg, 87%). **IR** ( $\nu$  in  $\text{cm}^{-1}$ ) 2925, 2854, 1648, 1556, 1466, 1439, 1374, 1242, 743.  **$^1\text{H}$  NMR** (300 MHz,  $\text{CDCl}_3$ )  $\delta_{\text{ppm}}$  7.52 (d,  $J = 7.0$  Hz, 1H), 7.47(s, 1H), 6.47(td,  $J = 7.0$  Hz; 5.0 Hz, 1H), 6.30 (dd,  $J = 10.3$  Hz; 7.2 Hz, 1H), 2.96 (t,  $J = 7.7$  Hz, 2H), 1.83 (m, 2H), 1.24 (m, 16H), 0.89 (t,  $J = 6.6$  Hz, 3H).  **$^{13}\text{C}$  NMR** (75 MHz,  $\text{CD}_3\text{CN}$ )  $\delta_{\text{ppm}}$  154.5 (d,  $J_{\text{C-F}} = 247.5$  Hz), 142.2, 124.1 (d,  $J_{\text{C-F}} = 39.0$  Hz), 119.0 (d,  $J_{\text{C-F}} = 4.3$  Hz), 116.8 (d,  $J_{\text{C-F}} = 4.2$  Hz), 112.1 (d,  $J_{\text{C-F}} = 7.5$  Hz), 100.8 (d,  $J_{\text{C-F}} = 17.4$  Hz), 32.7, 30.4, 30.3, 30.1, 30.1, 30.0, 27.9, 27.7, 27.3, 23.4, 14.4.  **$^{19}\text{F}\{^1\text{H}\}$  NMR** (282 MHz,  $\text{CDCl}_3$ )  $\delta_{\text{ppm}}$  -123.5.

**MS** (EI)  $m/z$  290.9. **HRMS (ESI):**  $[M+H]^+$  calculated for  $C_{18}H_{28}N_2F$   $m/z$  291.2231, found  $m/z$  291.2234

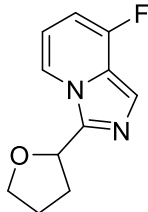

**8-Fluoro-3-(tetrahydrofuran-2-yl)imidazo[1,5-a]pyridine (2j).** Following the general procedure for stoichiometric C–H bond functionalization reactions with  $Cu(OPiv)_2$  and starting with **1j** (62.5 mg, 0.30 mmol; scale-out in 4 reaction vessels).

The reaction crude was treated with  $Na_2S$  (117.0 mg, 1.5 mmol) prior to the standard work-up. Column chromatography on neutral alumina and elution with cyclohexane provided **2j** as a yellow oil (170.0 mg, 69%). **IR** ( $\nu$  in  $cm^{-1}$ ) 2954, 2873, 1557, 1373, 1052, 753.  **$^1H$  NMR** (300 MHz,  $CD_3CN$ )  $\delta_{ppm}$  8.02 (dd,  $J = 7.0, 0.8$  Hz, 1H), 7.41 (d,  $J = 0.9$  Hz, 1H), 6.57 (td,  $J = 7.2, 5.1$  Hz, 1H), 6.48 (ddd,  $J = 11.0, 7.3, 0.7$  Hz, 1H), 5.27 (t,  $J = 6.9$  Hz, 1H), 3.94 – 3.70 (m, 2H), 2.79 – 2.63 (m, 1H), 2.35 – 2.22 (m, 2H), 2.17 – 1.96 (m, 3H).  **$^{13}C$  NMR** (75 MHz,  $CD_3CN$ )  $\delta_{ppm}$  153.2 (d,  $J_{C-F} = 247.5$  Hz), 140.2, 119.2, 115.8 (d,  $J_{C-F} = 4.1$  Hz), 111.5 (d,  $J_{C-F} = 7.2$  Hz), 101.2, 101.0, 73.1, 68.1, 28.4, 25.6.  **$^{19}F\{^1H\}$  NMR** (282 MHz,  $CD_3CN$ )  $\delta$  -126.7. **HRMS (ESI):**  $[M+H]^+$  calculated for  $C_{11}H_{12}N_2FO$   $m/z$  207.0928, found  $m/z$  207.0927.

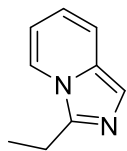

**3-Ethylimidazo[1,5-a]pyridine (2a').** Following the general procedure for stoichiometric C–H bond functionalization reactions with  $Cu(OPiv)_2$  and starting with *N*-propyl-1-(pyridin-2-yl)methanimine (**1a'**), **2a'** was obtained in 36% conversion

(36% yield), as determined by GC-MS using 4-fluorotoluene as standard.

**$^1H$  NMR** (300 MHz,  $CDCl_3$ )  $\delta$  7.60 (d,  $J = 7.2$  Hz, 1H), 7.30 (d,  $J = 9.1$  Hz, 1H), 7.27 (s, 1H, *solvent overlap*), 6.54 (dd,  $J = 8.9, 6.5$  Hz, 1H), 6.42 (t,  $J = 6.7$  Hz, 1H), 2.88 (q,  $J = 7.5$  Hz, 2H), 1.36 (t,  $J = 7.5$  Hz, 3H). **MS** (EI)  $[M+H]^+$  calculated for  $C_9H_{11}N_2$   $m/z$  146.1 found 146.2.

Characterization data match previous literature reports: Zeng et al. *Org. Lett.* **2014**, *16*, 6232–6235.

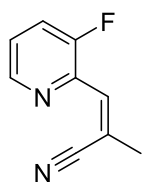

**(Z)-3-(3-Fluoropyridin-2-yl)-2-methylacrylonitrile (4).** Following the general procedure for stoichiometric C–H bond functionalization reactions with preformed CuBr<sub>2</sub>-aldimine complexes and using NH<sub>4</sub>OAc (34.7 mg, 0.45 mmol) as base in a

solvent mixture of CHCl<sub>3</sub>-AcOH (80:20, 4 mL) and work-up A, a crude mixture containing **2a** (traces), **3** (49%) and **4** (15%) could be determined by <sup>19</sup>F NMR with 4-fluorotoluene as standard. The product was purified by flash column chromatography using silica gel and a solvent mixture of CHCl<sub>3</sub>-pentane (25:75) as eluent. **IR** (ν in cm<sup>-1</sup>) 2925, 2211 (C≡N), 1432, 1243, 799. **<sup>1</sup>H NMR** (300 MHz, CDCl<sub>3</sub>) δ<sub>ppm</sub> 8.53 (dt, *J* = 4.5, 1.4 Hz, 1H), 7.43 (ddd, *J* = 9.8, 8.4, 1.4 Hz, 1H), 7.33 (dt, *J* = 8.5, 4.3 Hz, 1H), 7.20 (p, *J* = 1.7 Hz, 1H), 2.25 (d, *J* = 1.7 Hz, 3H). **<sup>13</sup>C NMR** (126 MHz, CDCl<sub>3</sub>) δ<sub>ppm</sub> 156.9 (d, *J*<sub>C-F</sub> = 263.6 Hz), 145.4 (d, *J*<sub>C-F</sub> = 5.4 Hz), 140.6, 133.4, 125.6, 123.3 (d, *J*<sub>C-F</sub> = 19.0 Hz), 118.6, 112.2, 22.9. **<sup>19</sup>F{<sup>1</sup>H} NMR** (282 MHz, CDCl<sub>3</sub>) δ<sub>ppm</sub> -124.3. **HRMS** (DCI-CH<sub>4</sub>) [M+H]<sup>+</sup> calculated for C<sub>9</sub>H<sub>8</sub>FN<sub>2</sub> m/z 163.0672 found 163.0669. Crystallographic data available in section **D**.

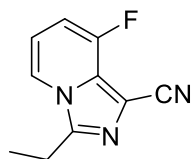

**3-Ethyl-8-fluoroimidazo[1,5-a]pyridine-1-carbonitrile (6a).** Following the general procedure for catalytic C–H bond functionalization reactions and starting with **1a** (50.0 mg, 0.30 mmol; scale-out in 4 reaction vessels), elution with

cyclohexane/EtOAc/CH<sub>3</sub>CN (100:0:0 to 40:50:10) gave a white solid (163.4 mg, 72%). **IR** (ν in cm<sup>-1</sup>) 2923, 2215 (C≡N), 1564, 1271. **<sup>1</sup>H NMR** (300 MHz, Methylene Chloride-*d*<sub>2</sub>) δ<sub>ppm</sub> 7.79 – 7.71 (m, 1H), 6.83 – 6.74 (m, 2H), 2.99 (q, *J* = 7.5 Hz, 2H), 1.44 (t, *J* = 7.5 Hz, 3H). **<sup>13</sup>C NMR** (75 MHz, Methylene Chloride-*d*<sub>2</sub>) δ<sub>ppm</sub> 153.2 (d, *J*<sub>C-F</sub> = 253.2 Hz), 144.2, 119.3 (d, *J*<sub>C-F</sub> = 5.1 Hz), 115.7, 114.4, 114.3, 106.8, 106.6, 20.7, 10.9. **<sup>19</sup>F{<sup>1</sup>H} NMR** (282 MHz, CD<sub>3</sub>CN) δ -126.7. **HRMS** (DCI-CH<sub>4</sub>) [M+H]<sup>+</sup> calculated for C<sub>10</sub>H<sub>9</sub>FN<sub>3</sub> m/z 190.0775 found 190.0786.

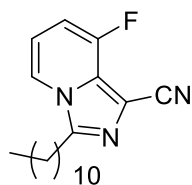

**3-Undecyl-8-fluoroimidazo[1,5-a]pyridine-1-carbonitrile (6b).** Following the

general procedure for catalytic C–H bond functionalization reactions and starting with **1b** (87.7 mg, 0.30 mmol; scale out in 2 reaction vessels), elution with cyclohexane/EtOAc/CH<sub>3</sub>CN (100:0:0 to 40:50:10) gave a white solid (140.0 mg, 74%). **IR** ( $\nu$  in cm<sup>-1</sup>) 2919, 2850, 2220 (C≡N), 1560, 1246. **<sup>1</sup>H NMR** (300 MHz, Methylene Chloride-*d*<sub>2</sub>)  $\delta_{\text{ppm}}$  7.75 (dd,  $J = 4.9, 2.8$  Hz, 1H), 6.83 – 6.72 (m, 2H), 2.96 (t,  $J = 7.7$  Hz, 2H), 1.85 (p,  $J = 7.5$  Hz, 2H), 1.26 (s, 12H), 0.94 – 0.80 (m, 4H). **<sup>13</sup>C NMR** (75 MHz, Methylene Chloride-*d*<sub>2</sub>)  $\delta_{\text{ppm}}$  153.1 (d,  $J_{\text{C-F}} = 253.2$  Hz), 143.3, 119.2 (d,  $J_{\text{C-F}} = 5.1$  Hz), 115.6, 114.1 (d,  $J_{\text{C-F}} = 6.7$  Hz), 106.6, 106.4, 100.5 (d,  $J_{\text{C-F}} = 4.6$  Hz), 43.9, 32.3, 30.6, 30.0, 29.9, 29.7, 29.7, 29.6, 27.3, 27.1, 26.8, 23.1, 14.3. **<sup>19</sup>F{<sup>1</sup>H} NMR** (282 MHz, Methylene Chloride-*d*<sub>2</sub>)  $\delta$  -124.6. **HRMS** (DCI-CH<sub>4</sub>) calculated for C<sub>19</sub>H<sub>27</sub>FN<sub>3</sub>  $m/z$  316.2189 found 316.2193.

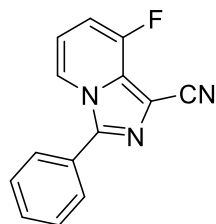

**8-Fluoro-3-phenylimidazo[1,5-a]pyridine-1-carbonitrile (6h).**

Following the general procedure for catalytic C–H bond functionalization reactions and starting with **1h** (64.3 mg, 0.30 mmol; scale out in 4 reaction vessels), elution with cyclohexane/EtOAc/CH<sub>3</sub>CN (100:0:0 to 33:56:11) gave a white solid (230.6 mg, 81%). **IR** ( $\nu$  in cm<sup>-1</sup>) 2225 (C≡N), 1564, 1407. **<sup>1</sup>H NMR** (300 MHz, CD<sub>3</sub>CN)  $\delta_{\text{ppm}}$  8.27 (dd,  $J = 7.0, 0.7$  Hz, 1H), 7.86 – 7.72 (m, 2H), 7.68 – 7.52 (m, 3H), 6.98 (ddd,  $J = 10.5, 7.6, 0.6$  Hz, 1H), 6.87 (ddd,  $J = 7.6, 7.1, 4.9$  Hz, 1H). **<sup>13</sup>C NMR** (75 MHz, CD<sub>3</sub>CN)  $\delta_{\text{ppm}}$  153.3 (d,  $J_{\text{C-F}} = 250.1$  Hz), 142.5, 131.2, 130.2, 129.6, 121.6 (d,  $J_{\text{C-F}} = 5.1$  Hz), 115.6 (d,  $J_{\text{C-F}} = 6.8$  Hz), 108.5 (d,  $J_{\text{C-F}} = 16.4$  Hz). **<sup>19</sup>F{<sup>1</sup>H} NMR** (282 MHz, CD<sub>3</sub>CN)  $\delta$  -127.2 (d,  $J = 6.4$  Hz). **HRMS** (DCI-CH<sub>4</sub>) [M+H]<sup>+</sup> calculated for C<sub>14</sub>H<sub>9</sub>N<sub>2</sub>FO  $m/z$  238.0781, found  $m/z$  238.0772.

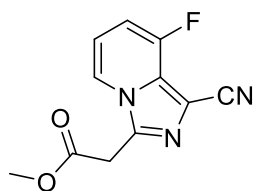
**Methyl (1-cyano-8-fluoroimidazo[1,5-a]pyridin-3-yl)acetate (6i).**

Following the general procedure for catalytic C–H bond functionalization reactions and starting with **1i** (63.1 mg, 0.30 mmol; scale out in 4 reaction vessels), elution with cyclohexane/EtOAc/CH<sub>3</sub>CN (77:19:4 to 8:77:15) gave a brown solid (152.9 mg, 55%). **IR** ( $\nu$  in cm<sup>-1</sup>) 2226 (C≡N), 1736, 1584, 1451, 1206.

**<sup>1</sup>H NMR** (300 MHz, CD<sub>3</sub>CN)  $\delta_{\text{ppm}}$  8.00 (d,  $J = 6.8$  Hz, 1H), 7.01 – 6.82 (m, 2H), 4.18 (s, 2H), 3.69 (s, 3H). **<sup>13</sup>C NMR** (126 MHz, CD<sub>3</sub>CN)  $\delta_{\text{ppm}}$  169.2, 153.1 (d,  $J_{\text{C-F}} = 250.1$  Hz), 137.3, 130.8 (d,  $J_{\text{C-F}} = 36.4$  Hz), 116.0, 115.1, 108.3 (d,  $J_{\text{C-F}} = 16.3$  Hz), 100.6, 53.2, 33.9. **<sup>19</sup>F{<sup>1</sup>H} NMR** (282 MHz, CD<sub>3</sub>CN)  $\delta$  -127.2. **HRMS** (DCI-CH<sub>4</sub>): [M+H]<sup>+</sup> calculated for C<sub>11</sub>H<sub>9</sub>N<sub>3</sub>FO<sub>2</sub> m/z 234.0679, found m/z 234.0691.

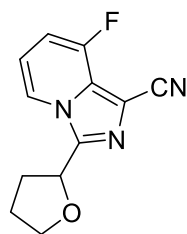
**8-Fluoro-3-(tetrahydrofuran-2-yl)imidazo[1,5-a]pyridine-1-carbonitrile**

**(6j)**. Following the general procedure for catalytic C–H bond functionalization reactions and starting with **1j** (62.5 mg, 0.30 mmol; scale-out in 4 reaction vessels), elution with cyclohexane/EtOAc/CH<sub>3</sub>CN (100:0:0 to 40:50:10) gave a white solid (190.0 mg, 69%). **IR** ( $\nu$  in cm<sup>-1</sup>): 3037, 2221 (C≡N), 1560, 1246. **<sup>1</sup>H NMR** (300 MHz, CD<sub>3</sub>CN)  $\delta_{\text{ppm}}$  8.26 (dd,  $J = 7.0, 0.7$  Hz, 1H), 6.96 (ddd,  $J = 10.6, 7.6, 0.7$  Hz, 1H), 6.88 (ddd,  $J = 7.6, 6.9, 5.0$  Hz, 1H), 5.31 (dd,  $J = 7.4, 6.0$  Hz, 1H), 3.97 – 3.74 (m, 2H), 2.77 – 2.59 (m, 1H), 2.32 (dddd,  $J = 12.4, 8.5, 7.4, 6.0$  Hz, 1H), 2.13 – 1.99 (m, 2H). **<sup>13</sup>C NMR** (75 MHz, CD<sub>3</sub>CN)  $\delta_{\text{ppm}}$  152.2 (d,  $J_{\text{C-F}} = 249.8$  Hz), 142.1, 121.3 (d,  $J_{\text{C-F}} = 5.2$  Hz), 115.3, 114.0 (d,  $J_{\text{C-F}} = 6.7$  Hz), 107.7 (d,  $J_{\text{C-F}} = 16.2$  Hz), 98.9, 72.9, 68.4, 28.4, 25.3. **<sup>19</sup>F{<sup>1</sup>H} NMR** (282 MHz, CD<sub>3</sub>CN)  $\delta$  -127.3. **HRMS** (DCI-CH<sub>4</sub>) [M+H]<sup>+</sup> calculated for C<sub>12</sub>H<sub>11</sub>N<sub>3</sub>FO m/z 232.0886, found m/z 232.0892.

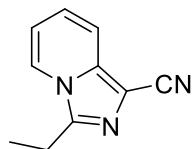

**3-Ethylimidazo[1,5-*a*]pyridine-1-carbonitrile (6a')**. Following the general procedure for catalytic C–H bond functionalization reactions and starting with *N*-propyl-1-(pyridin-2-yl)methanimine (**1a'**) (44.5 mg, 0.3 mmol; scale-out in 4 reaction vessels), elution with cyclohexane/EtOAc/CH<sub>3</sub>CN (100:0:0 to 40:50:10) gave a yellow solid (119.3 mg, 68%). **IR** ( $\nu$  in cm<sup>-1</sup>): 2218, 1533, 1456, 1277, 1220, 1078, 751. **<sup>1</sup>H NMR** (300 MHz, Acetonitrile-*d*<sub>3</sub>)  $\delta$  8.09 (dt,  $J = 7.2, 1.1$  Hz, 1H), 7.64 (dt,  $J = 9.2, 1.2$  Hz, 1H), 7.18 (ddd,  $J = 9.2, 6.6, 0.9$  Hz, 1H), 6.88 (ddd,  $J = 7.1, 6.6, 1.1$  Hz, 1H), 2.98 (q,  $J = 7.5$  Hz, 2H), 1.38 (t,  $J = 7.5$  Hz, 3H). **<sup>13</sup>C NMR** (75 MHz, Acetonitrile-*d*<sub>3</sub>)  $\delta$  150.6, 128.2, 124.6, 123.3, 116.4, 113.9, 113.1, 101.4, 19.5, 9.9. **HRMS** (DCI-CH<sub>4</sub>) [M+H]<sup>+</sup> calculated for C<sub>10</sub>H<sub>10</sub>N<sub>3</sub>  $m/z$  172.0875, found  $m/z$  172.0878.

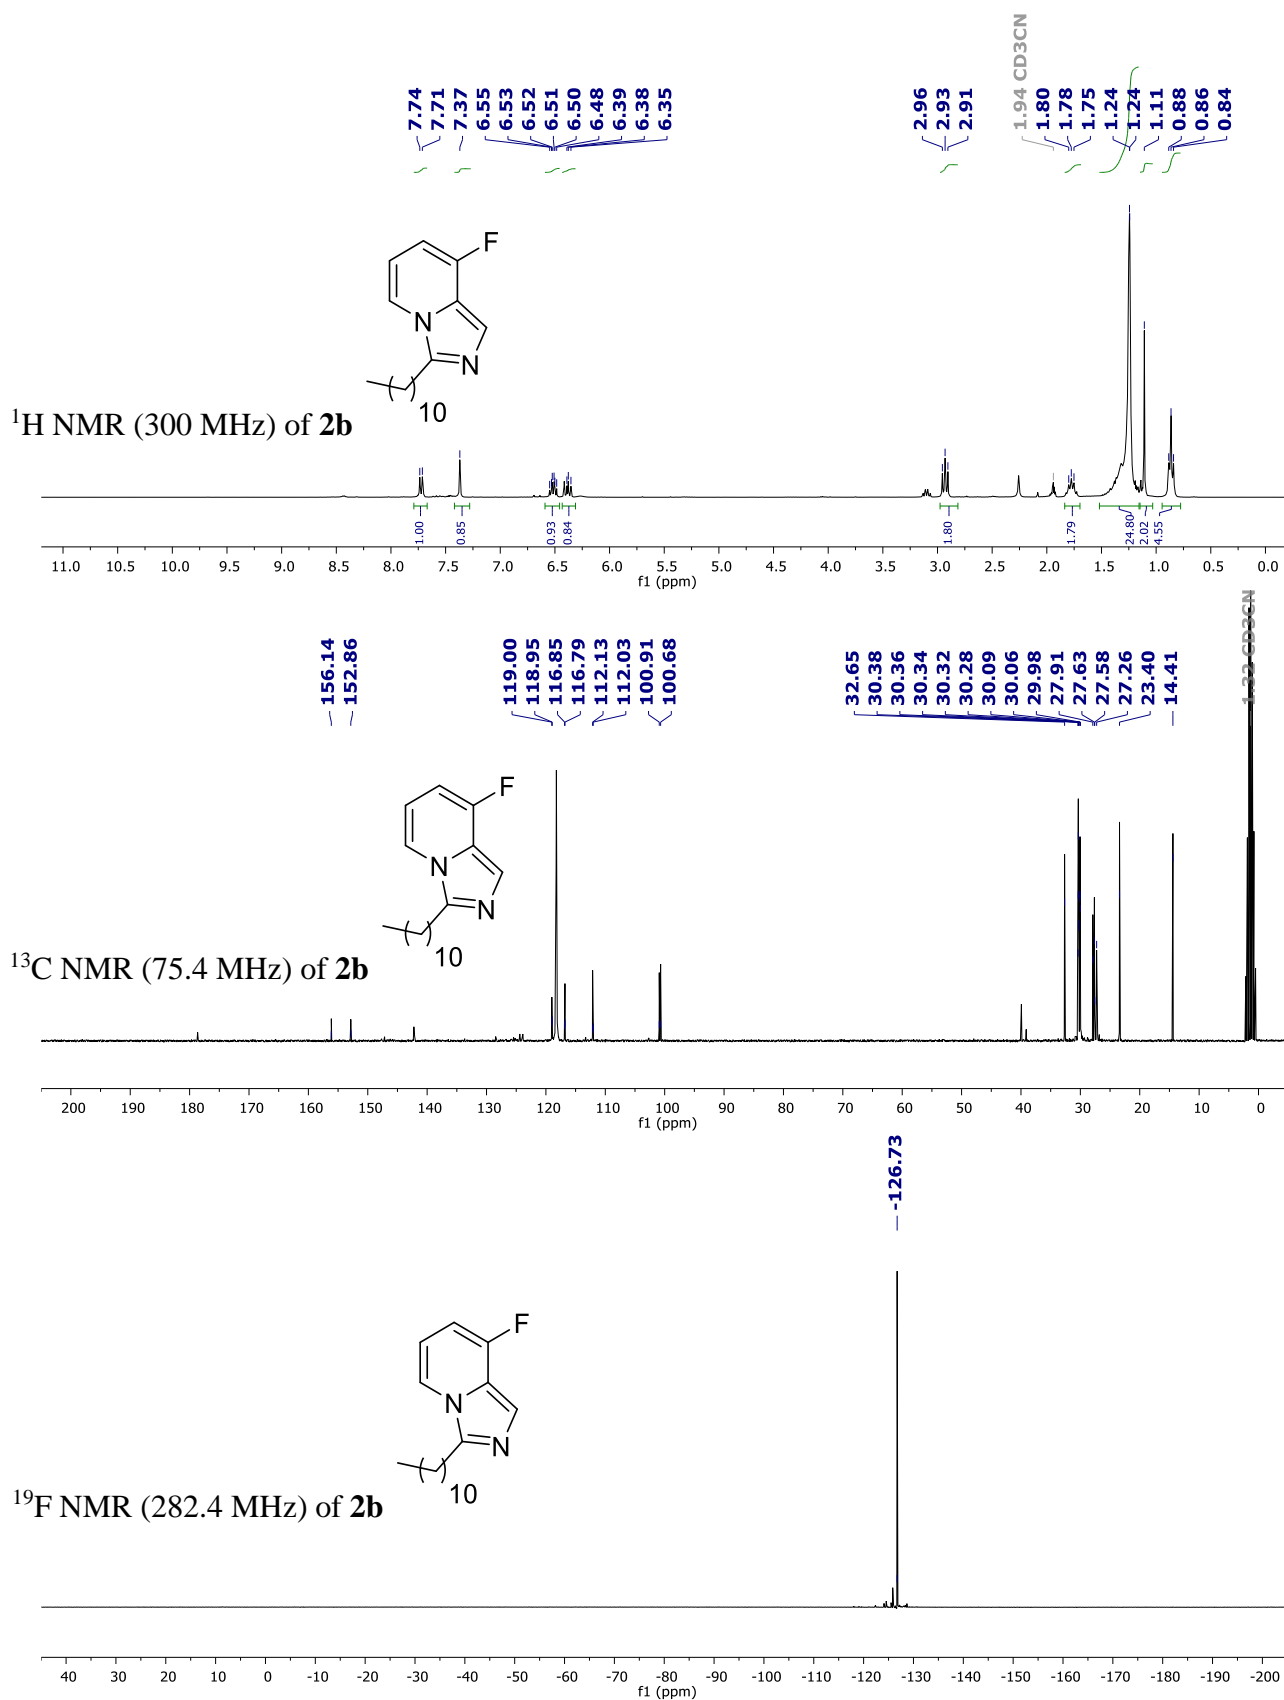

**Figure S8.** <sup>1</sup>H, <sup>13</sup>C and <sup>19</sup>F NMR spectra of **2b** containing impurities due to the instability of the product.

E.  $^1\text{H}$ ,  $^{13}\text{C}$ ,  $^{19}\text{F}$  NMR and 2D spectra of pure compounds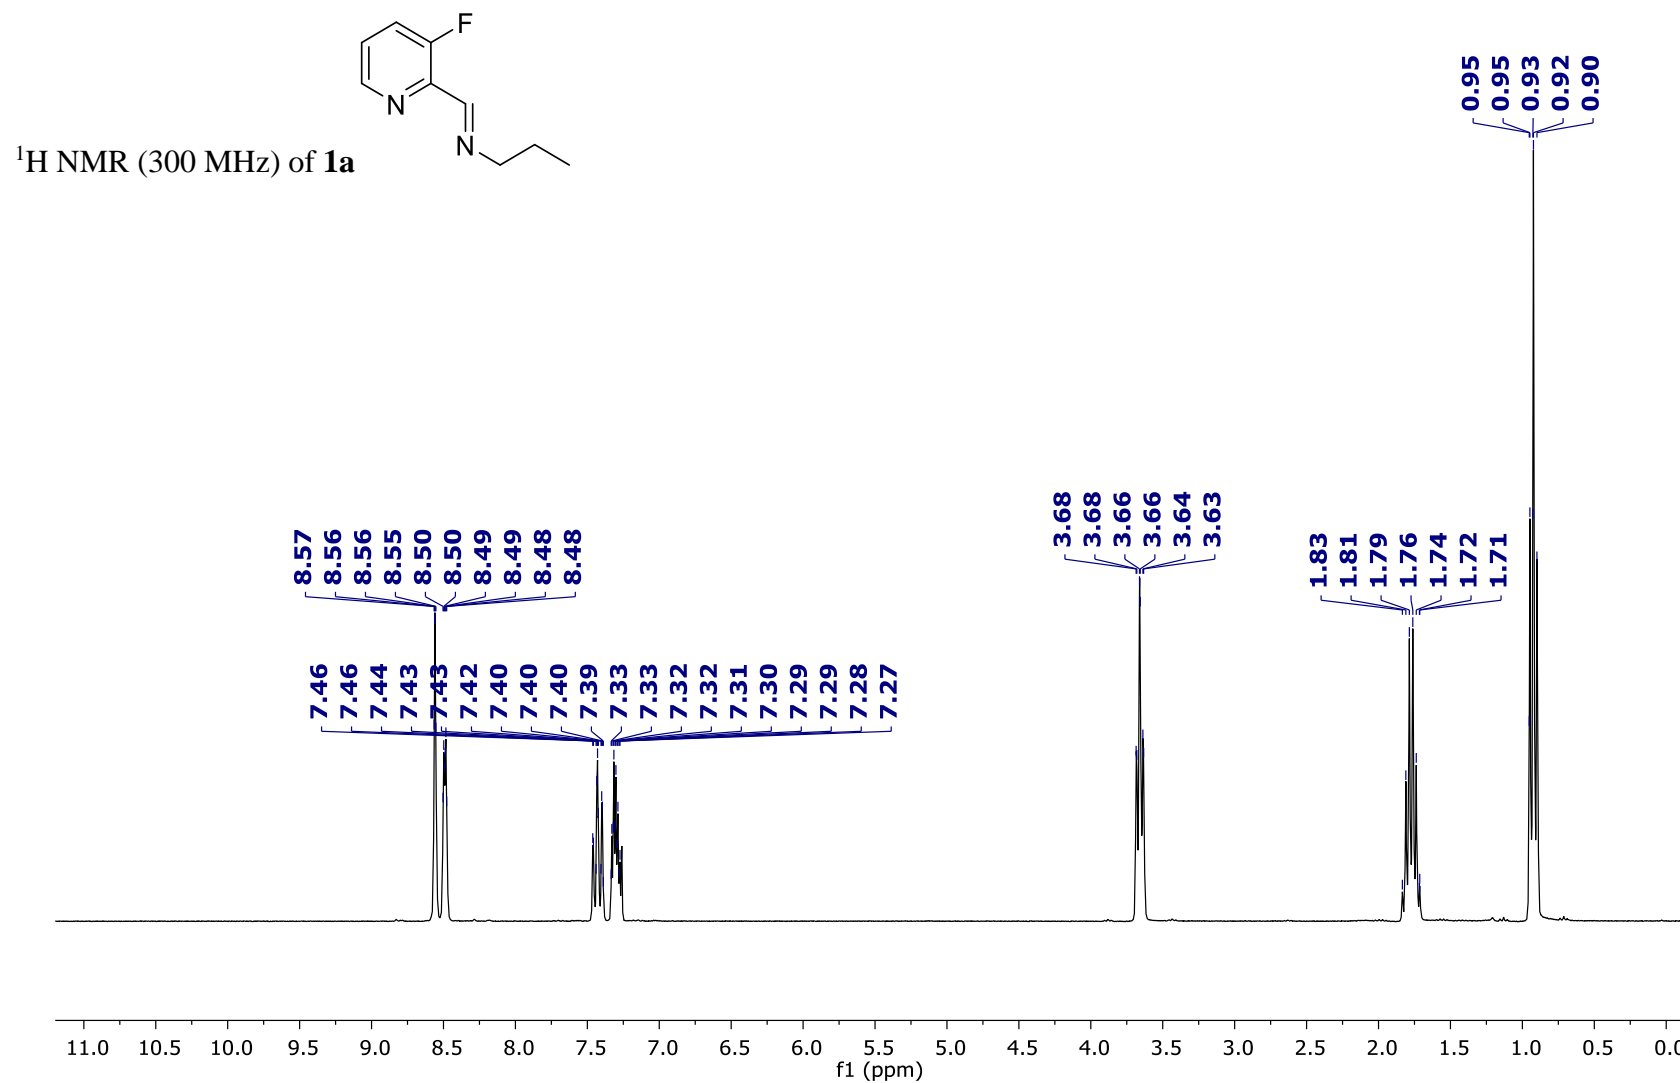



$^{13}\text{C}$  NMR (75.4 MHz) of **1a**

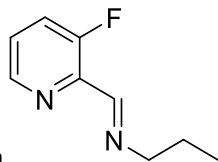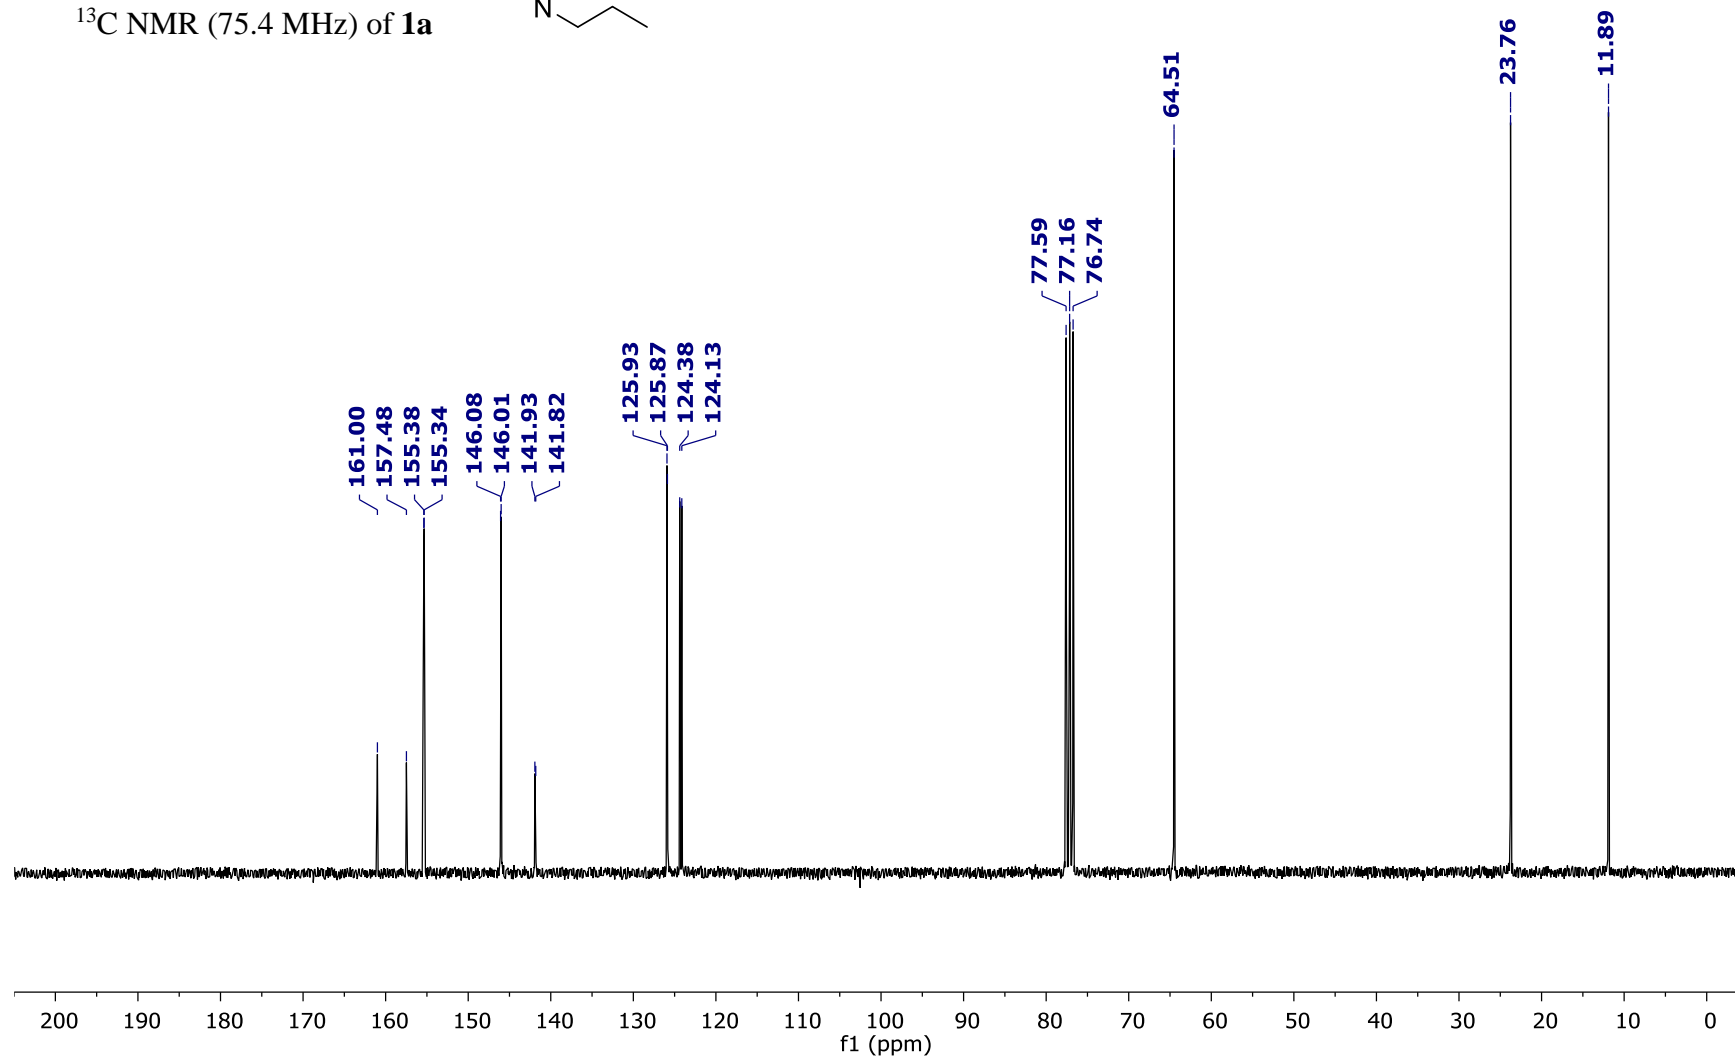

$^{19}\text{F}$  NMR (282.4 MHz) of **1a**

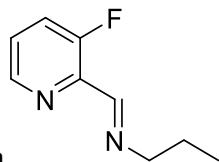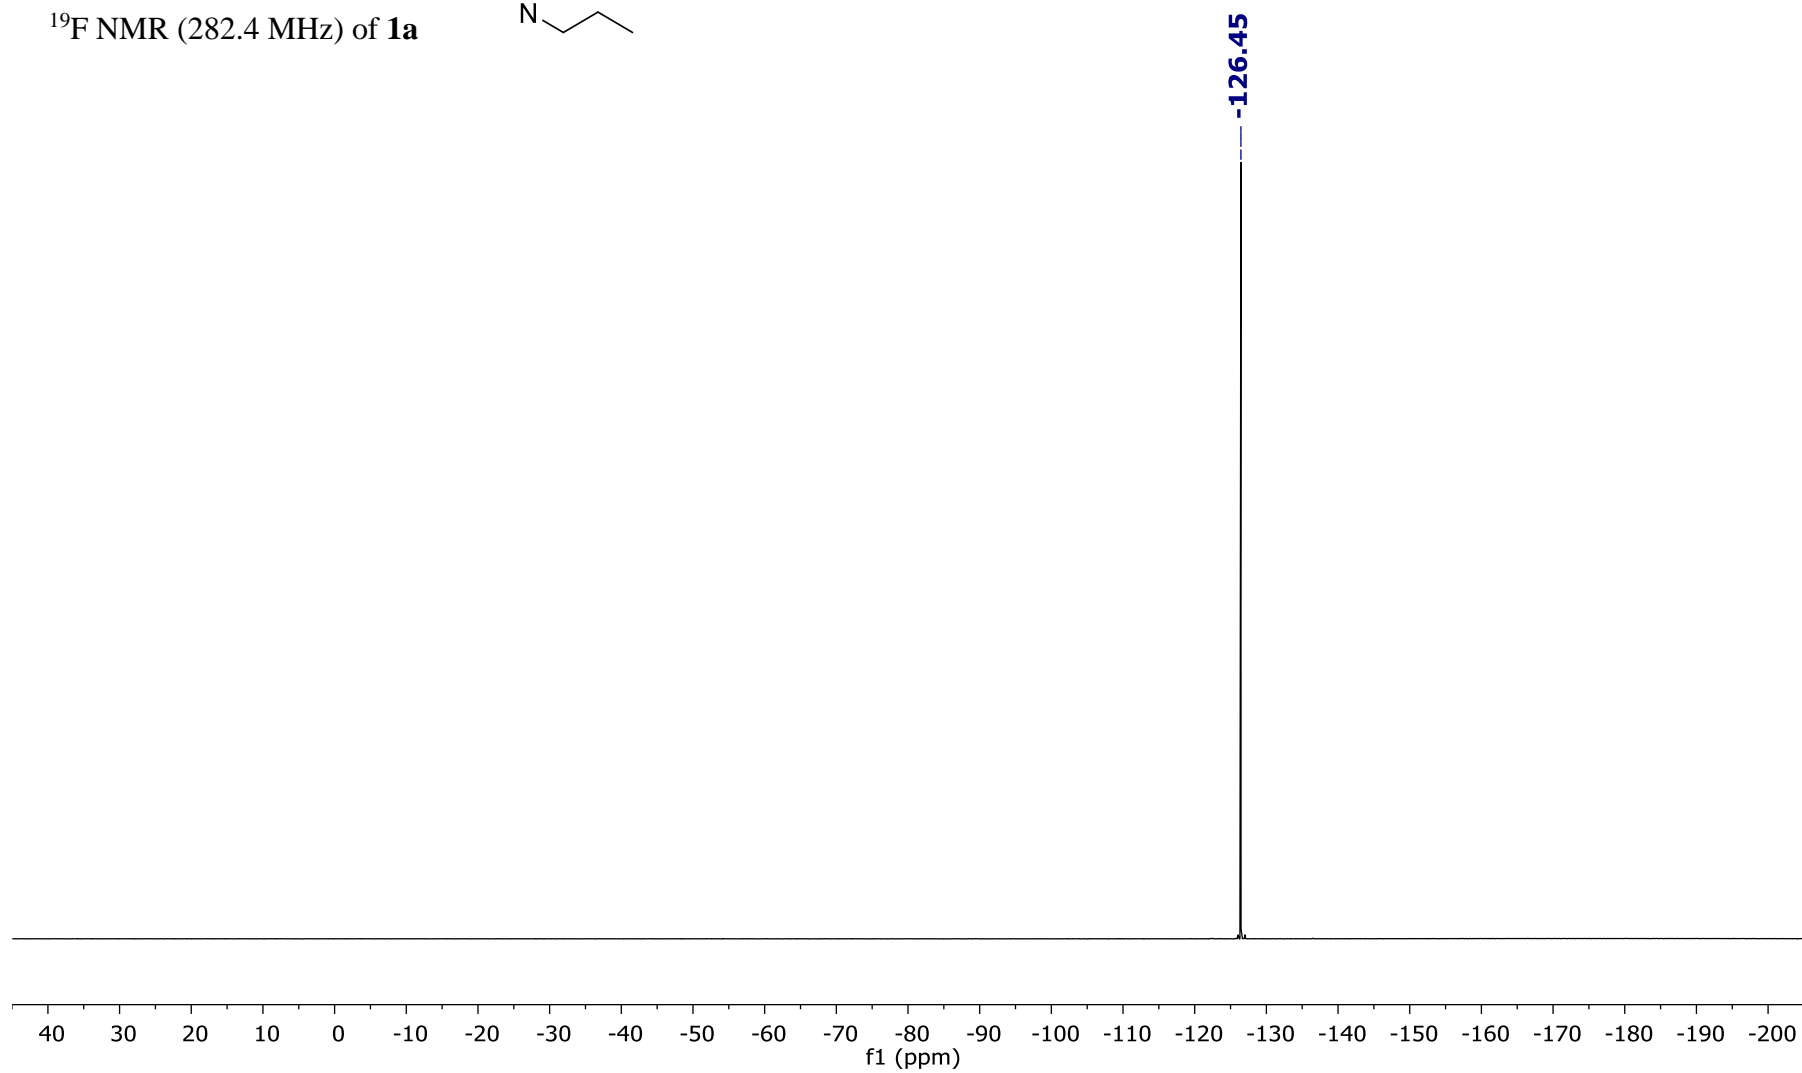

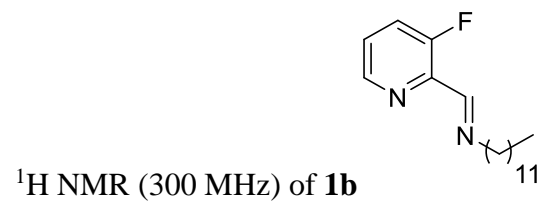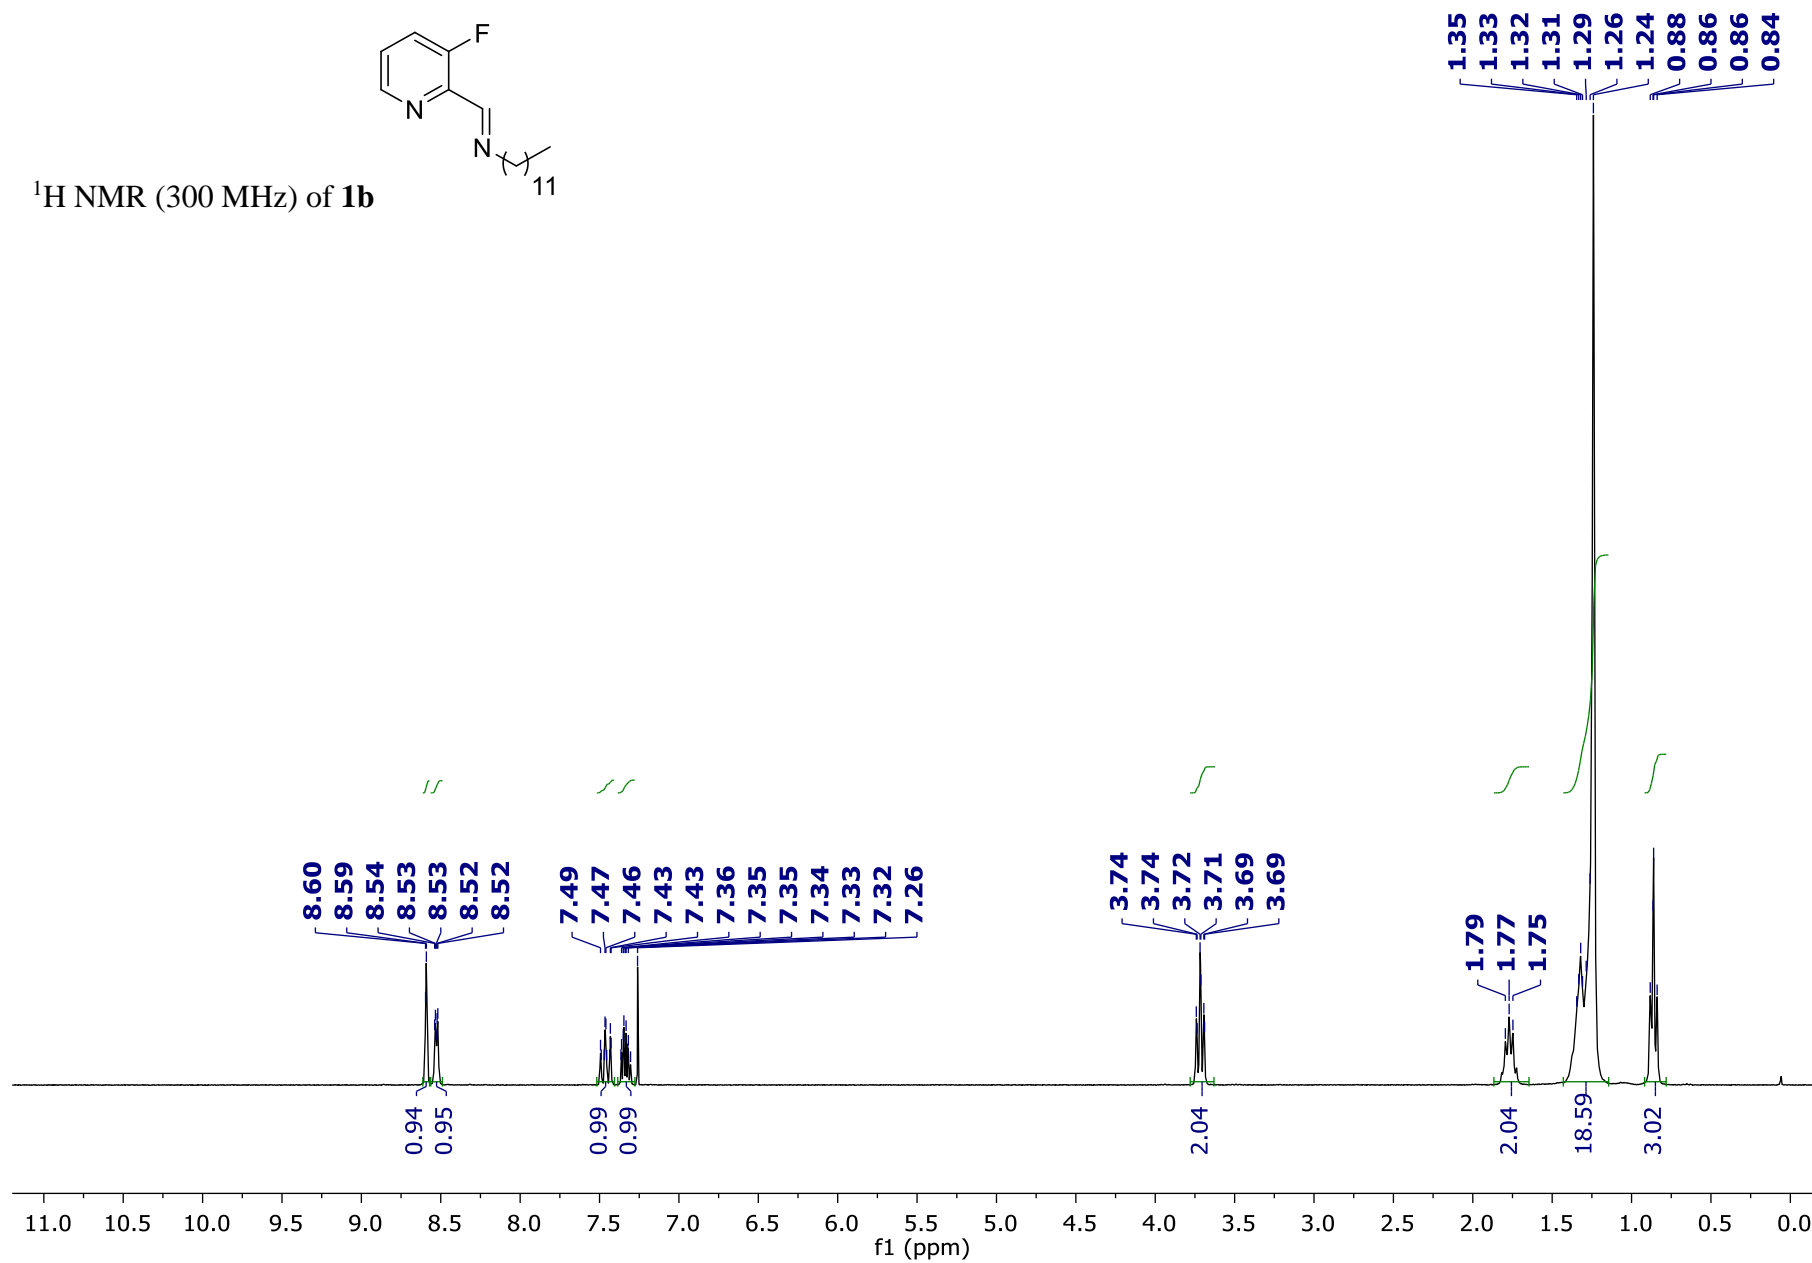

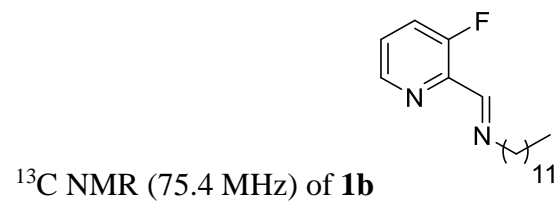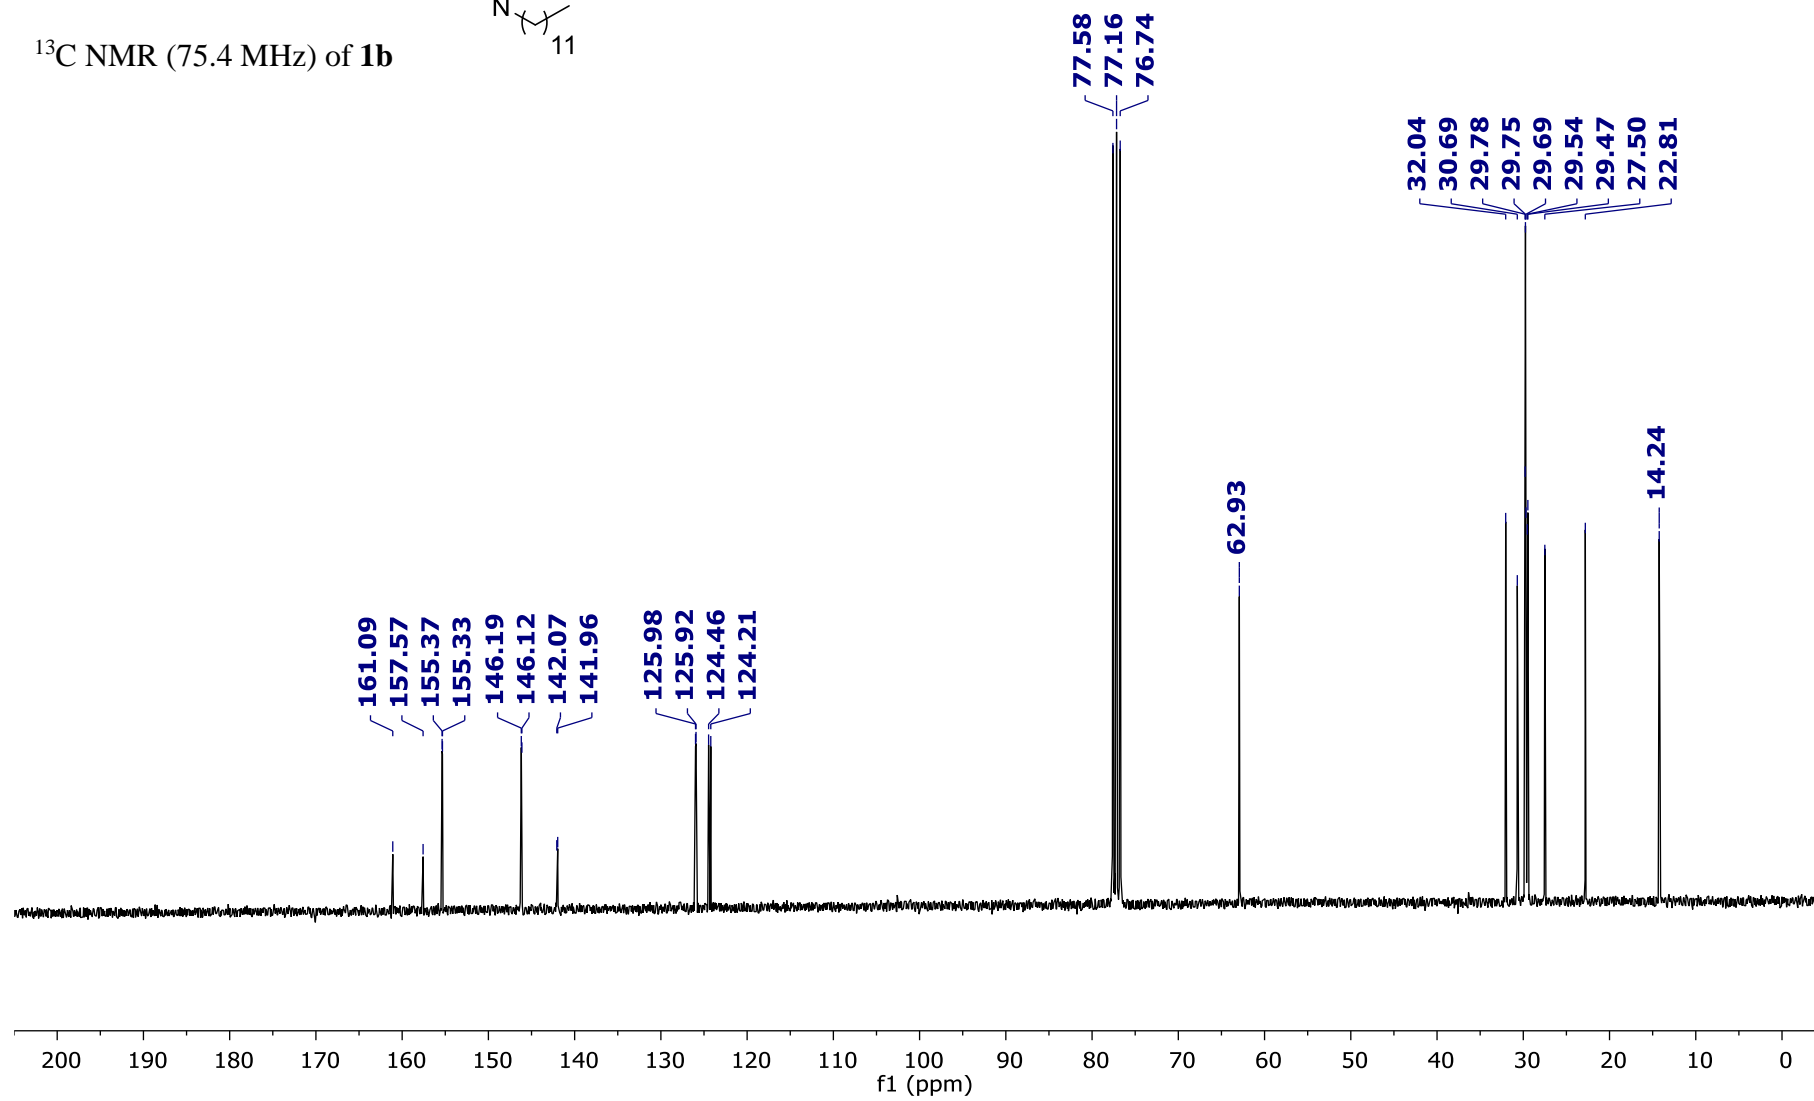

$^{19}\text{F}$  NMR (282.4 MHz) of **1b**

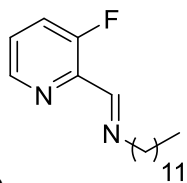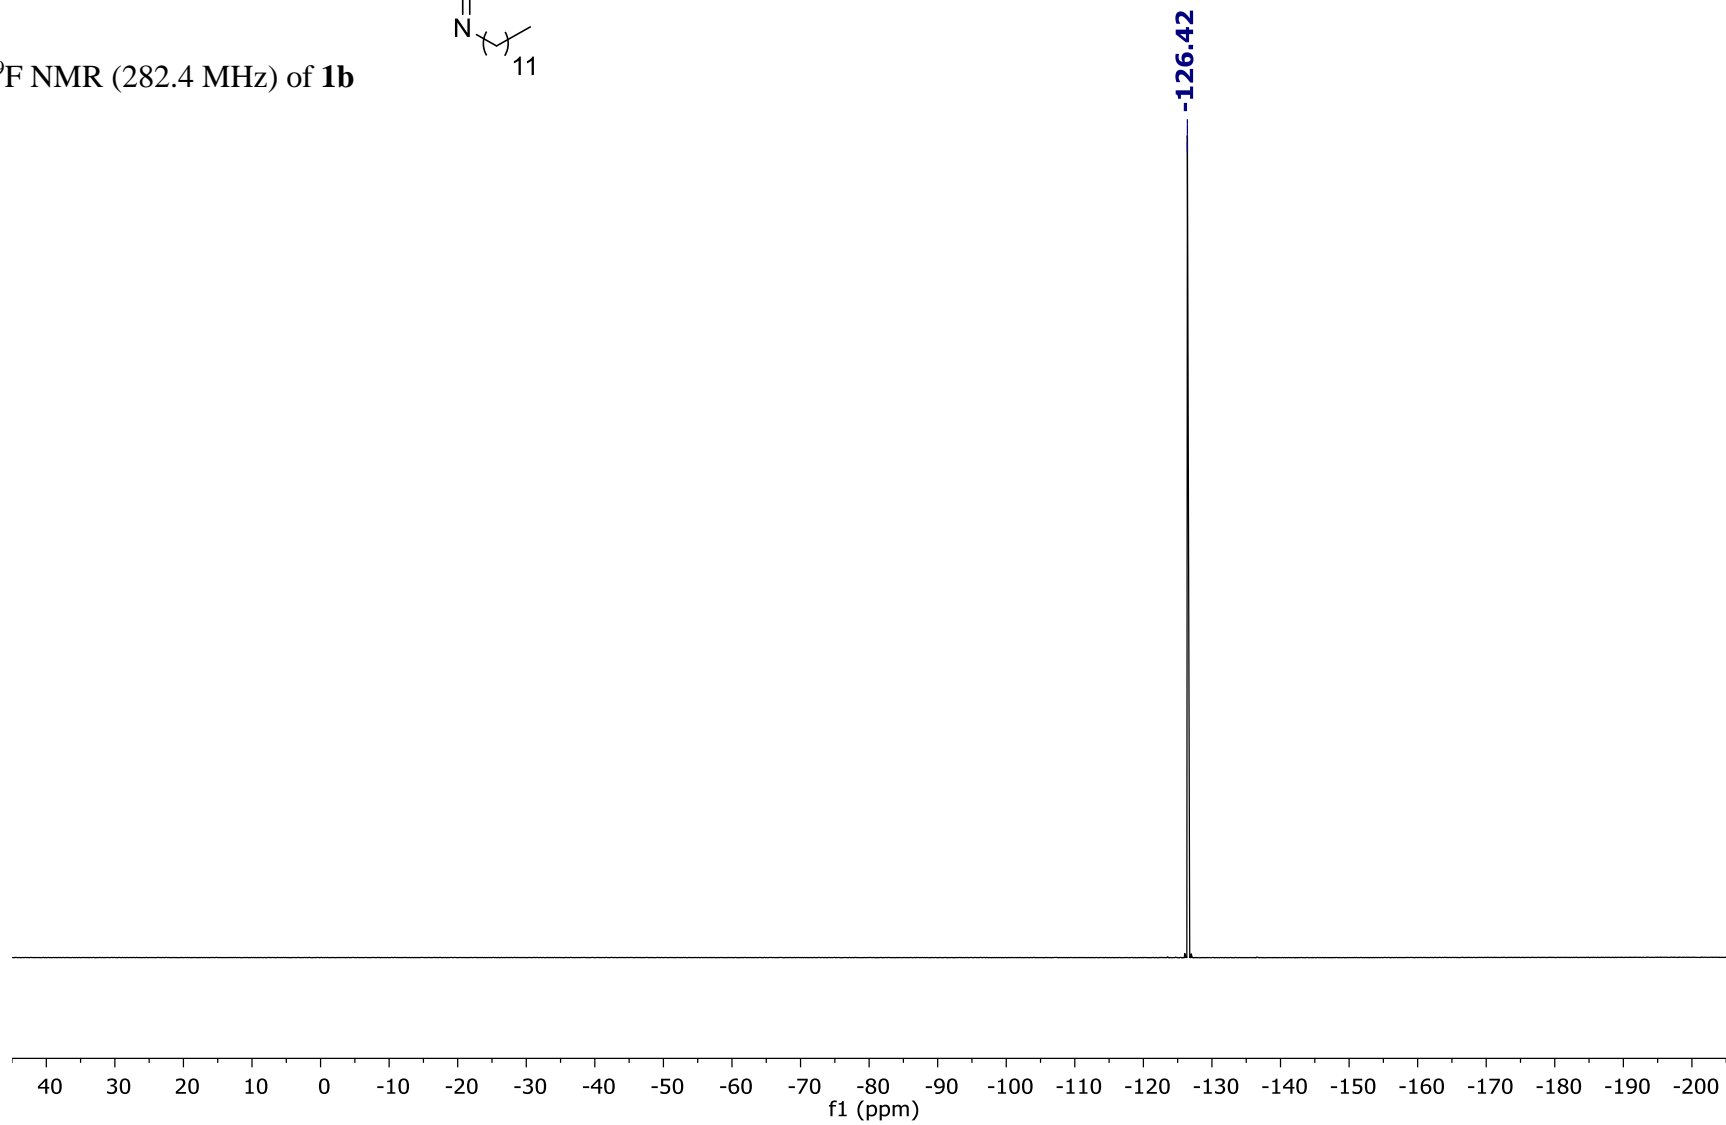

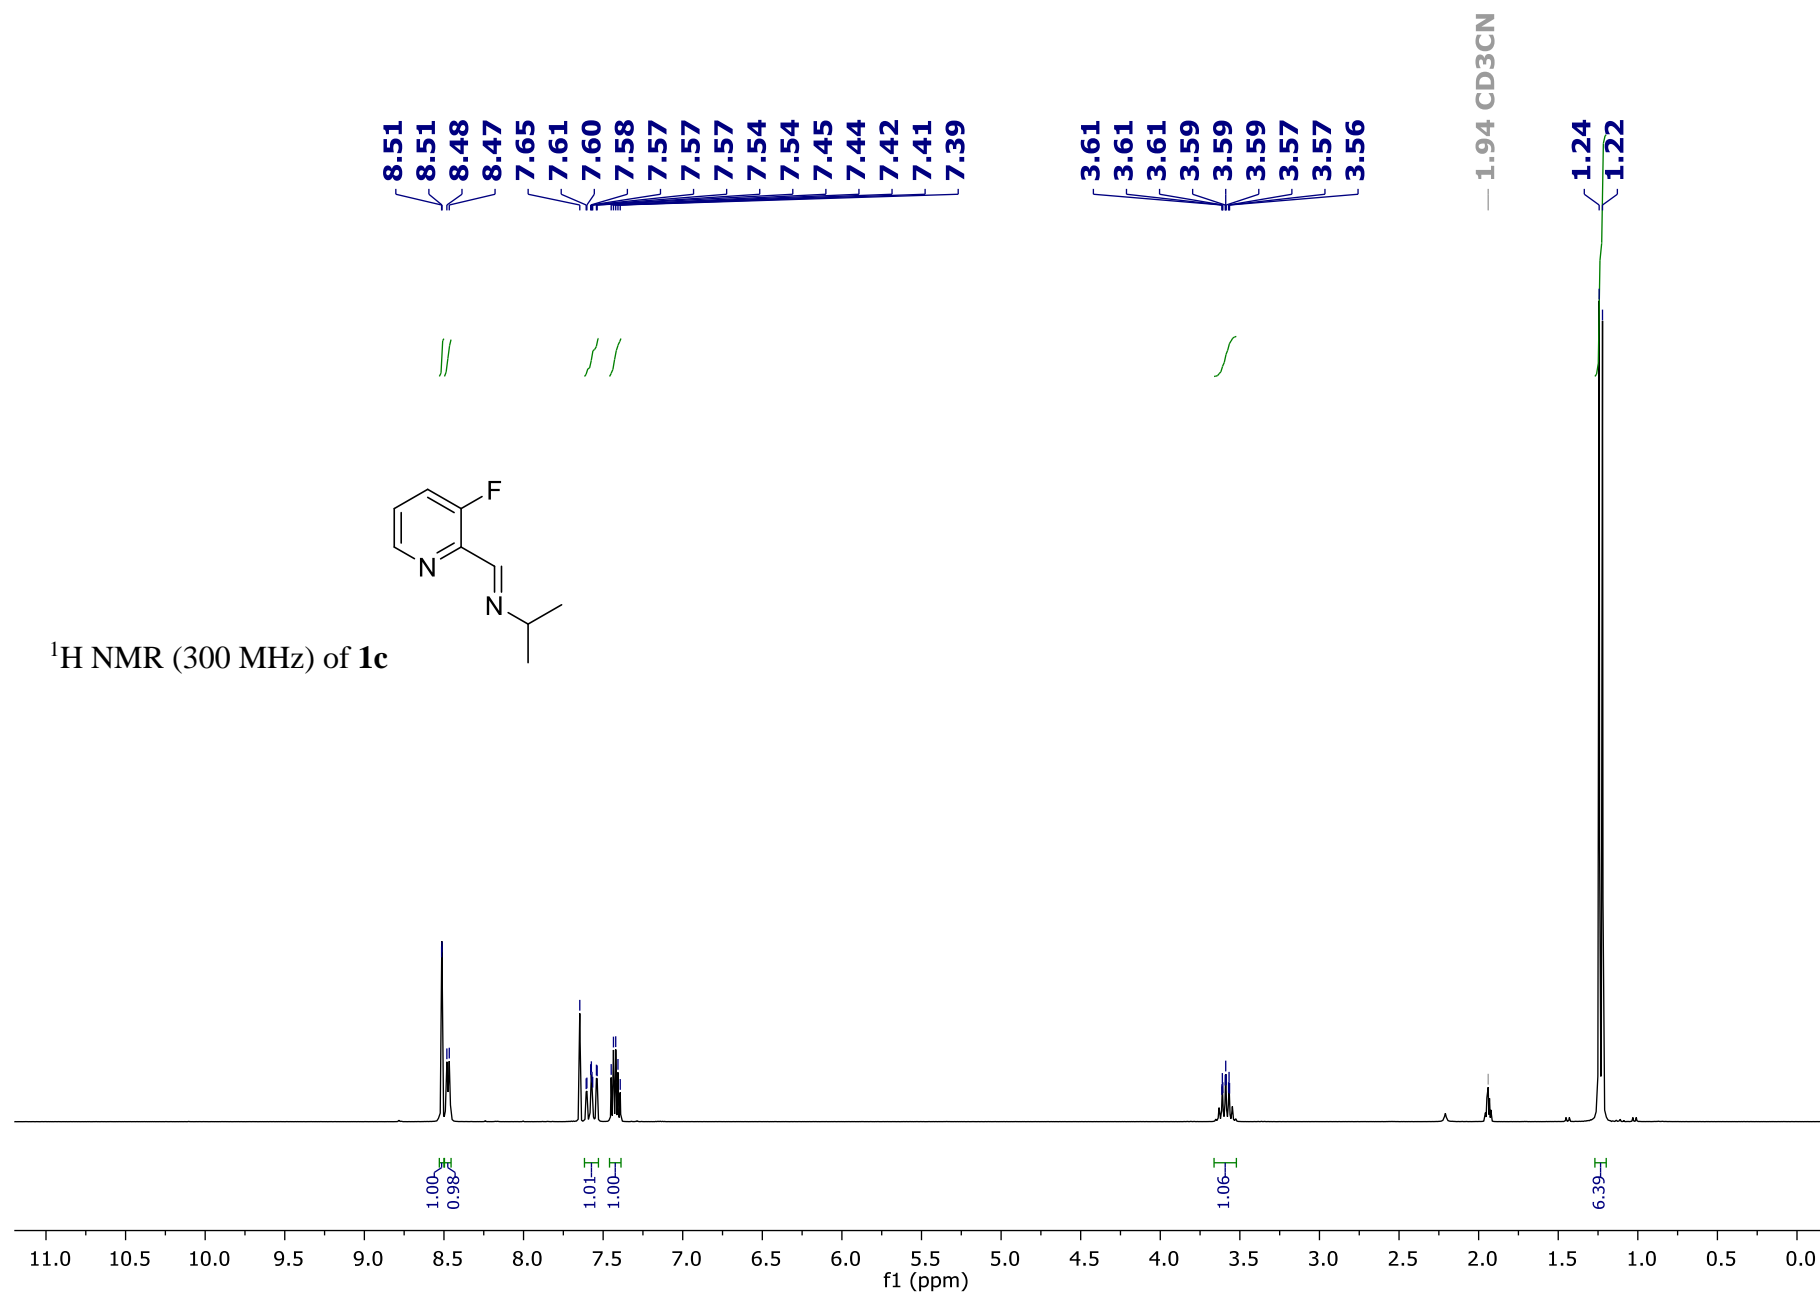

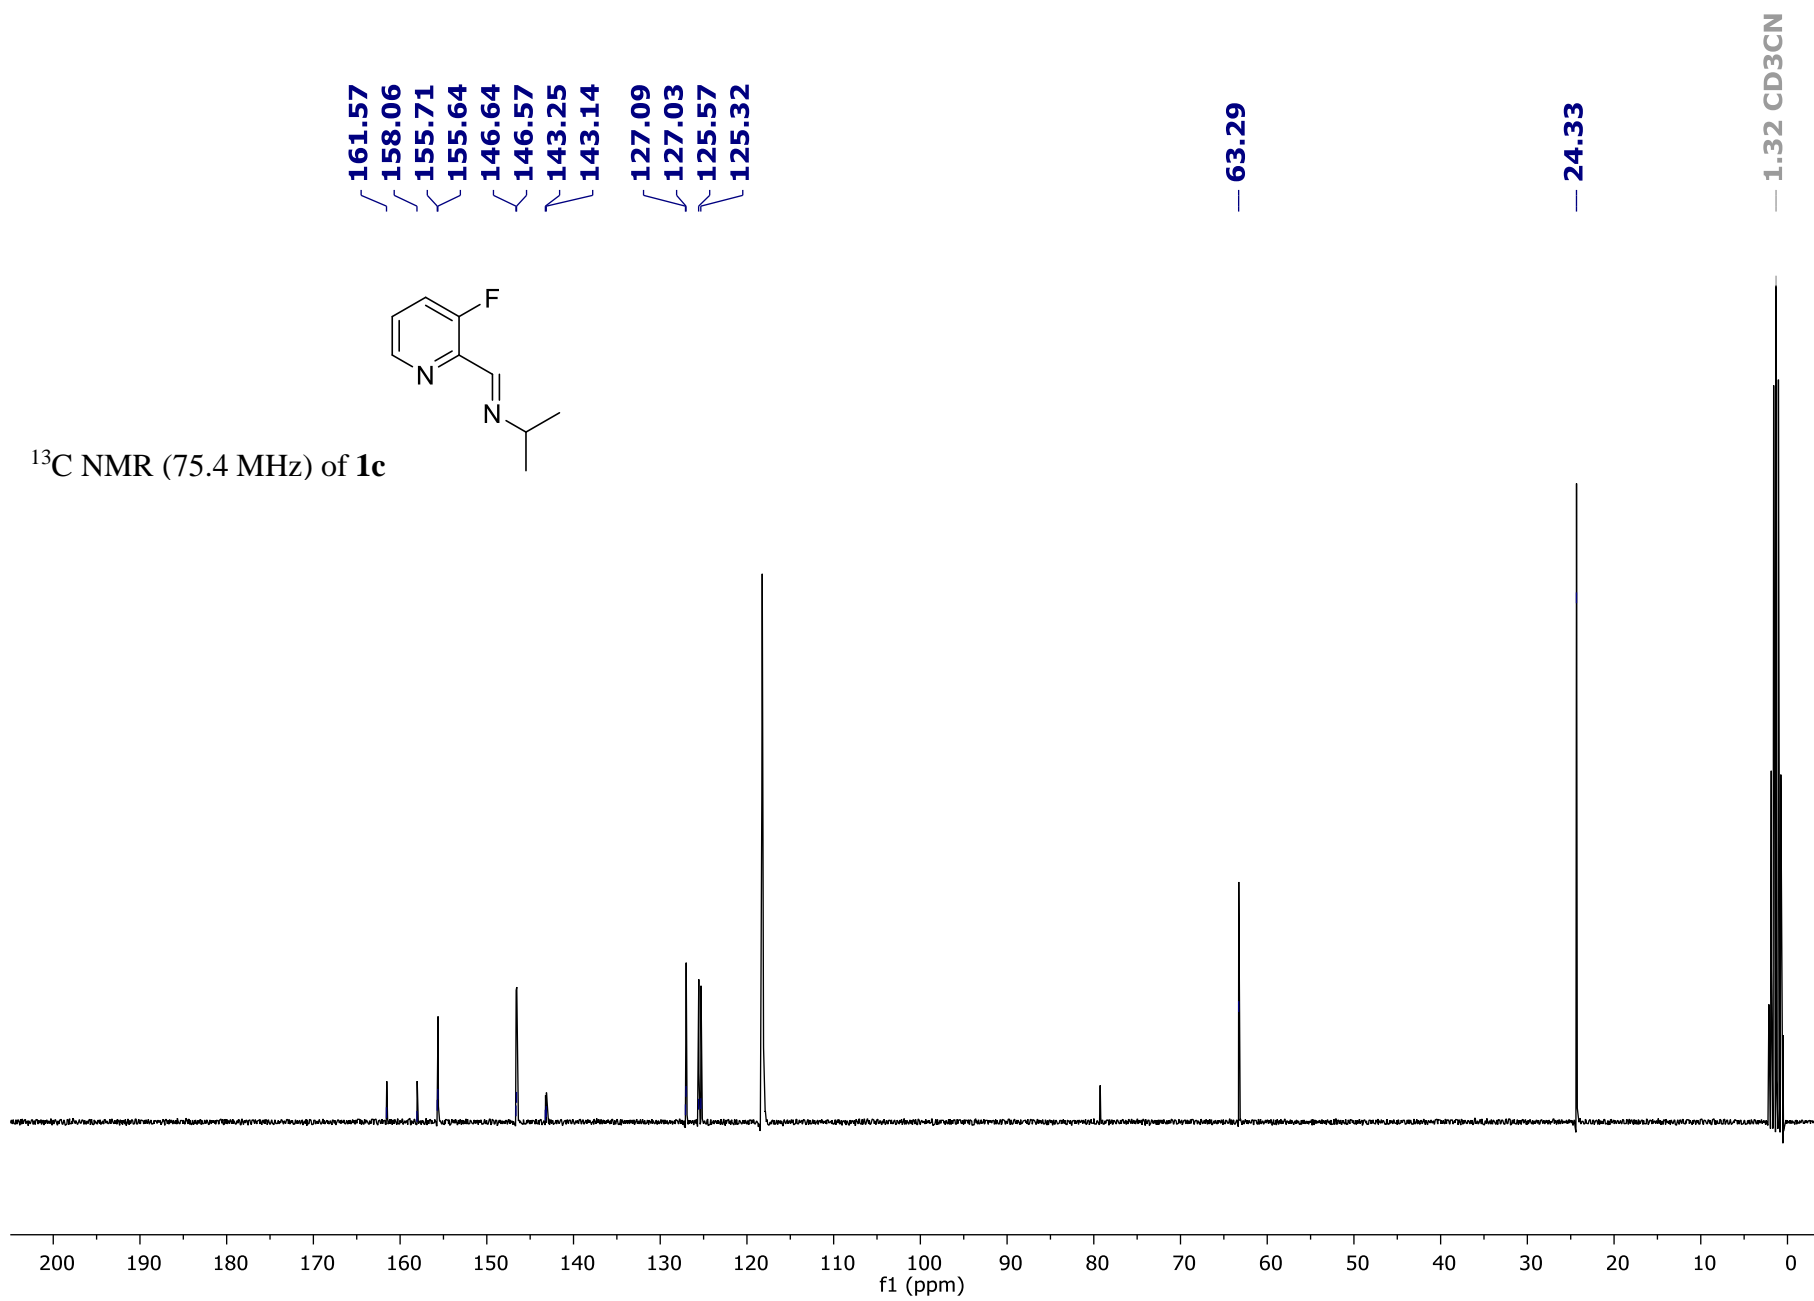

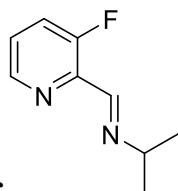

$^{19}\text{F}$  NMR (282.4 MHz) of **1c**

-- -125.43

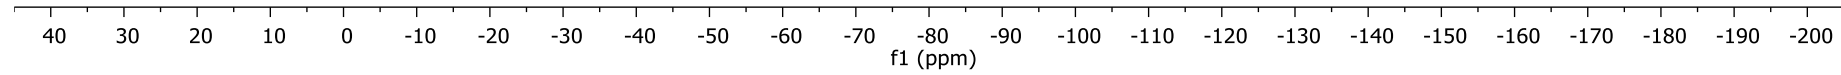



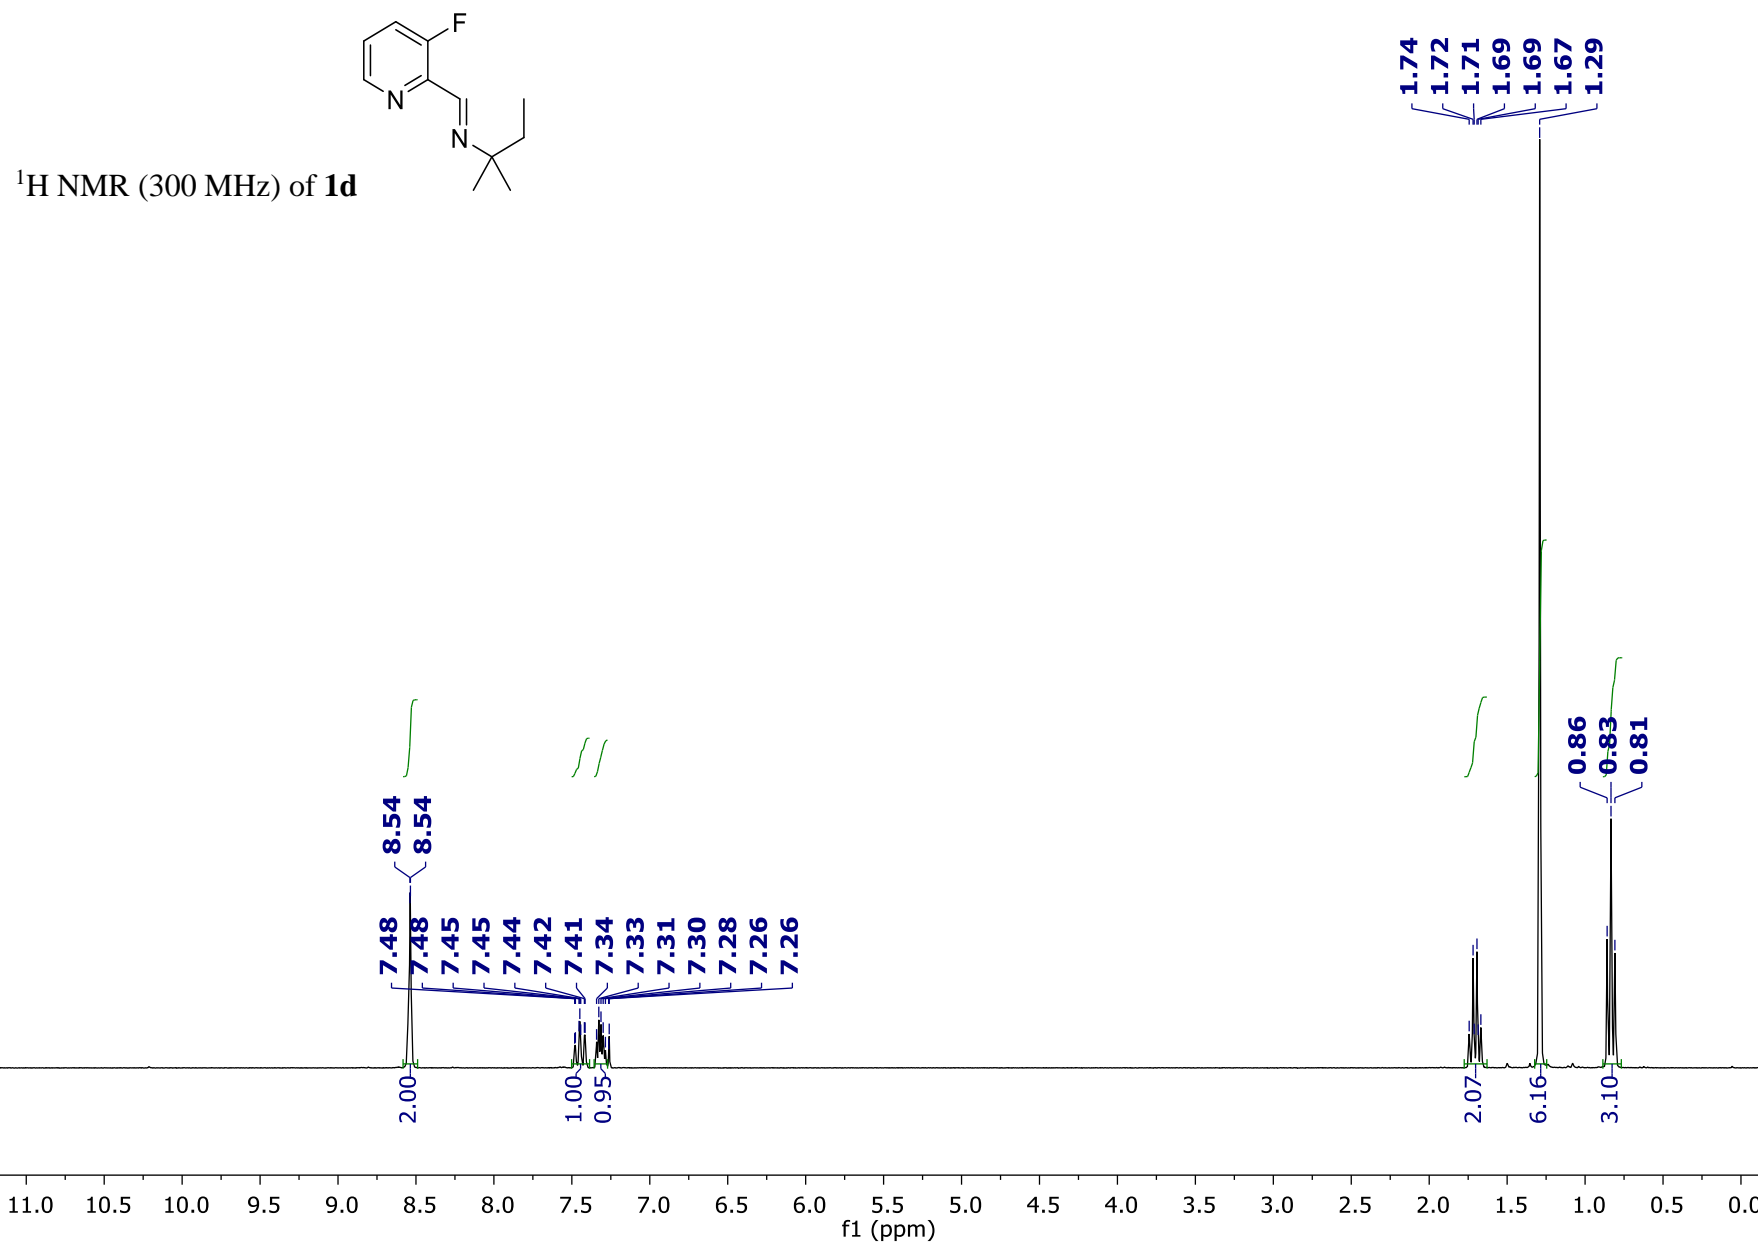

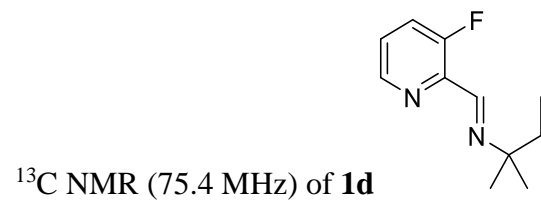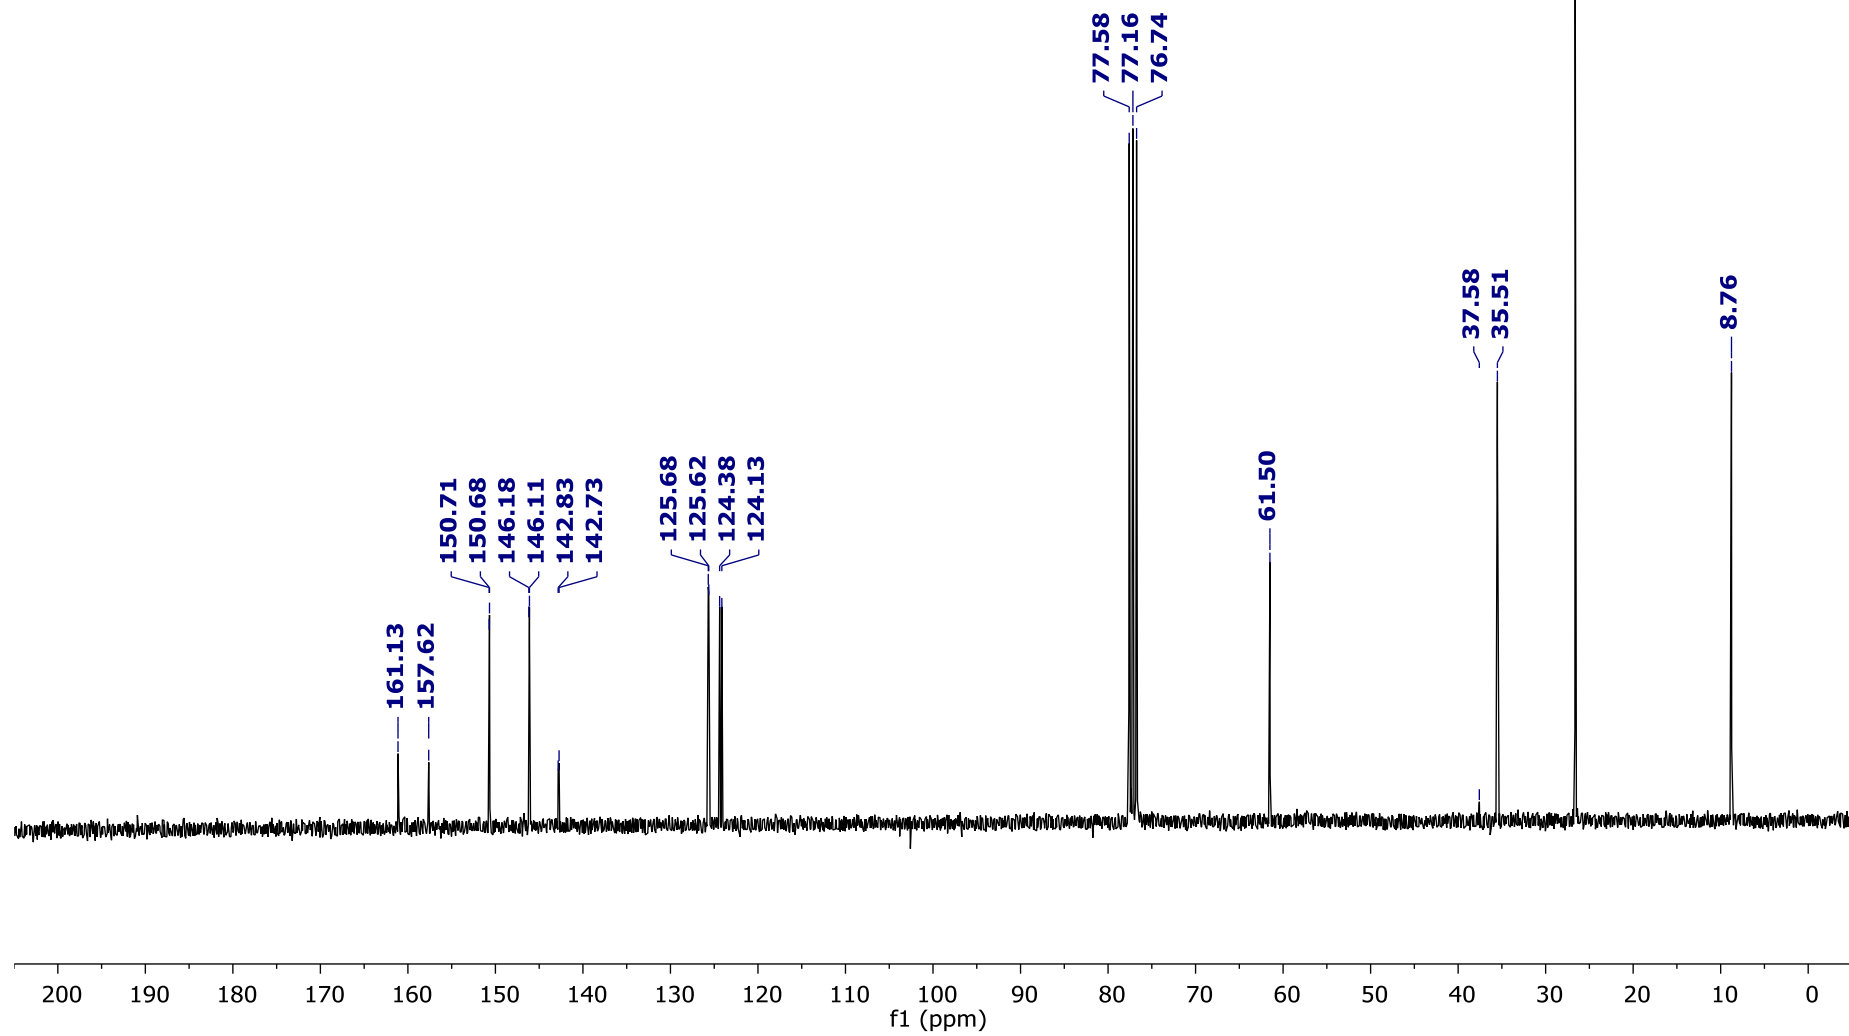

$^{19}\text{F}$  NMR (282.4 MHz) of **1d**

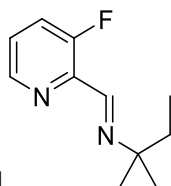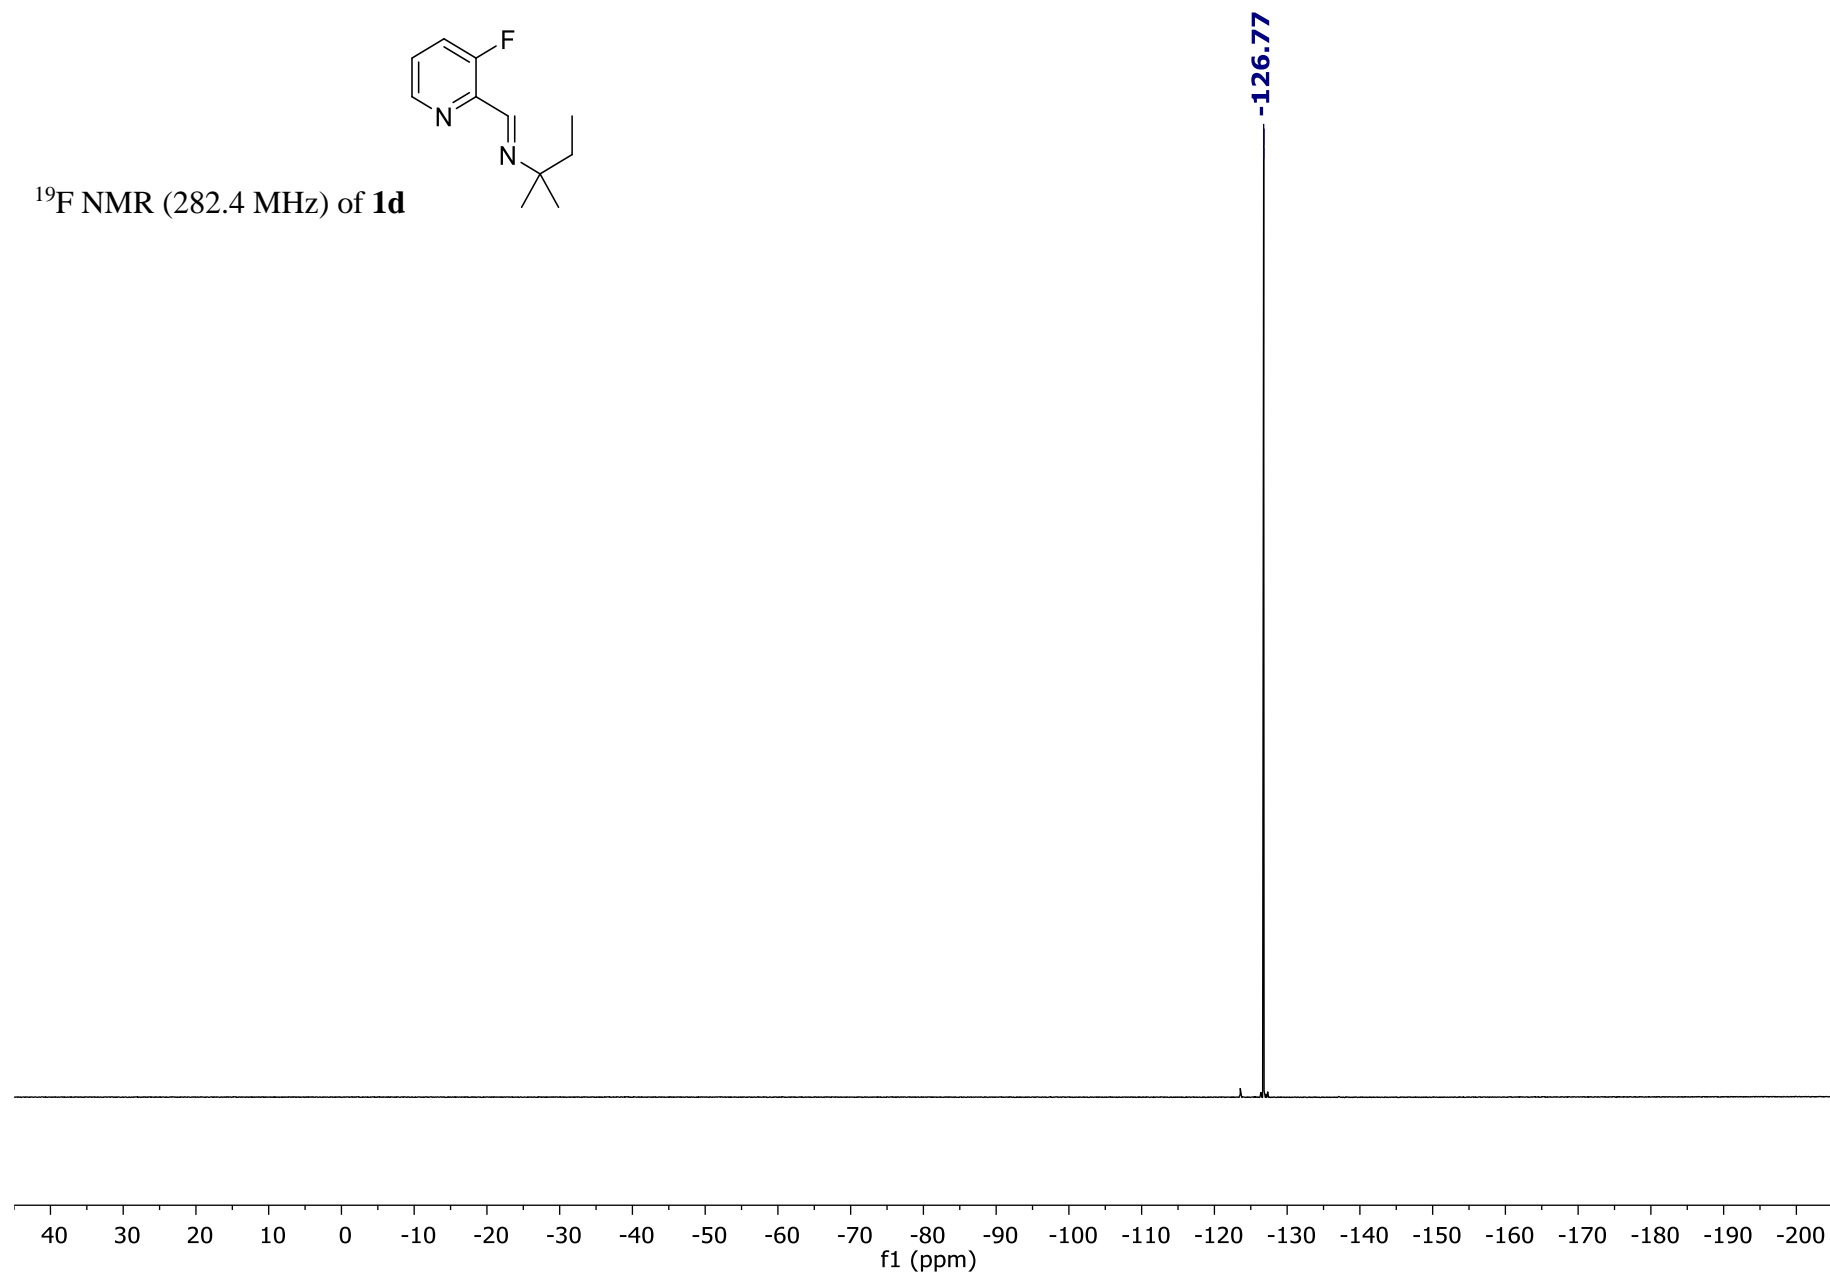

$^1\text{H}$  NMR (300 MHz) of **1e**

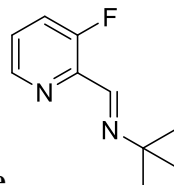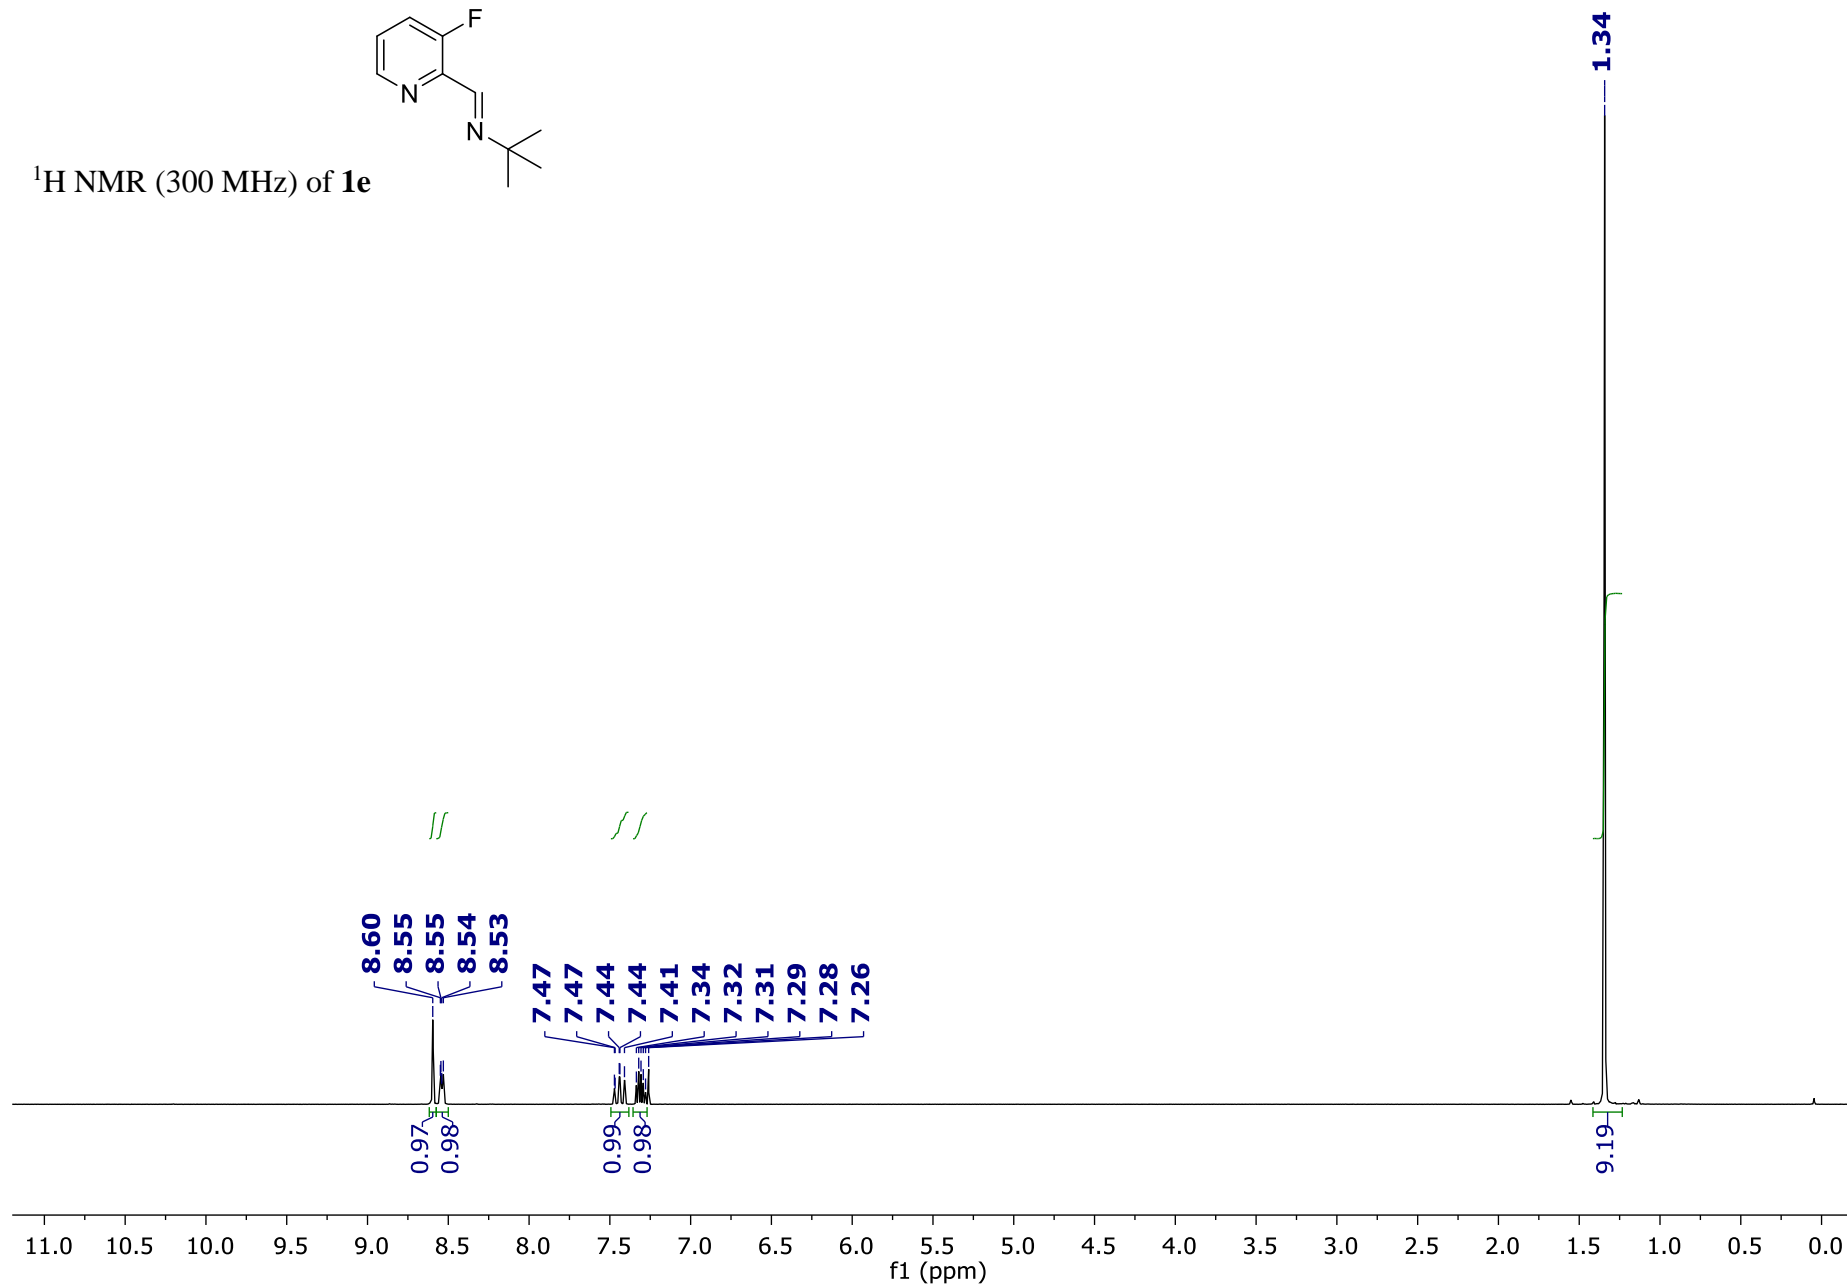

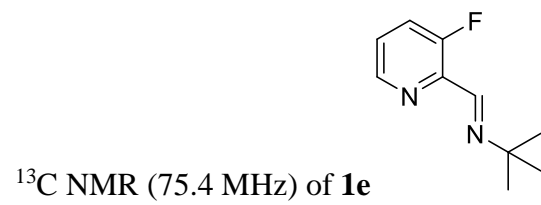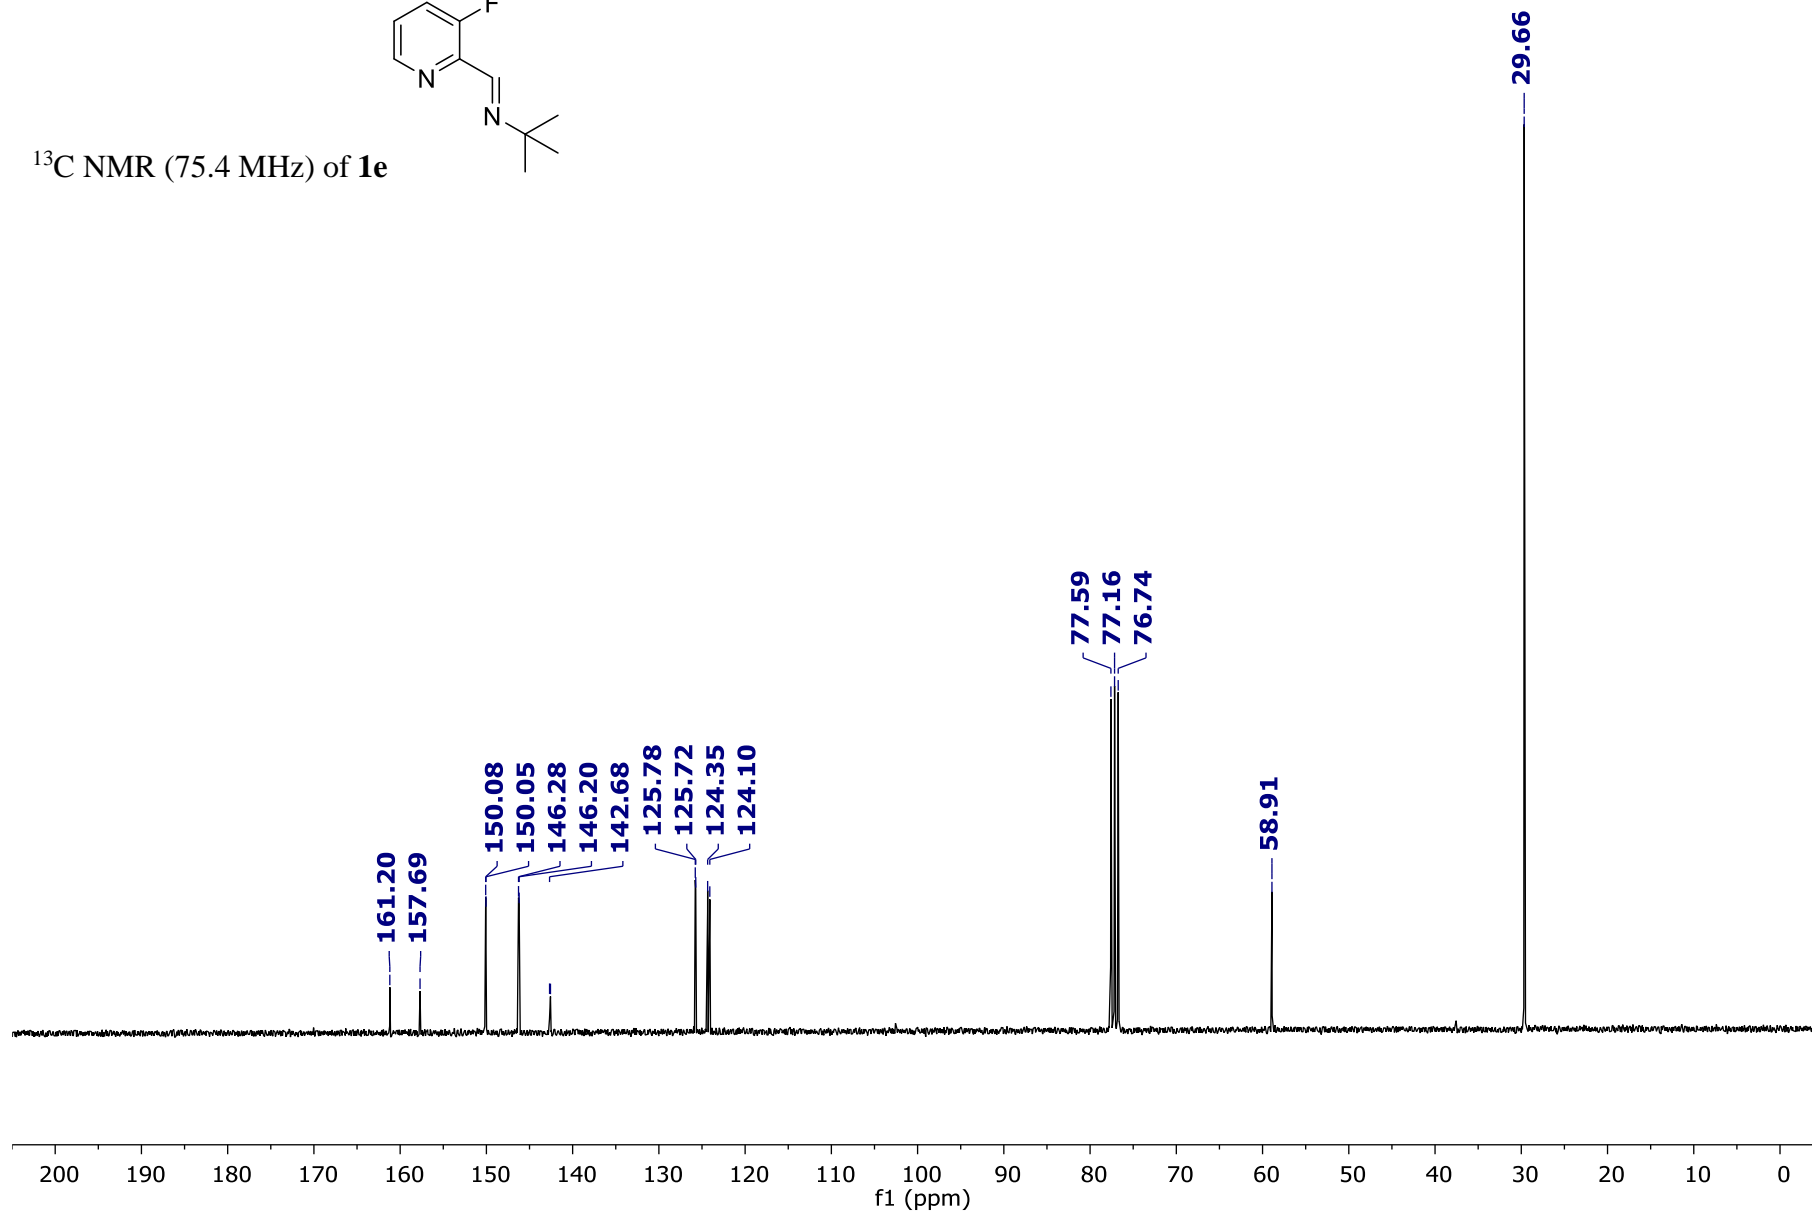

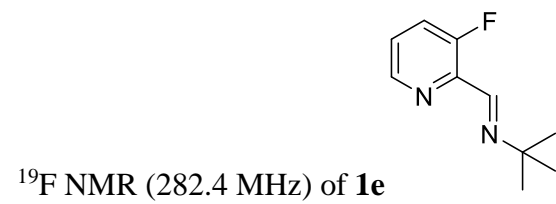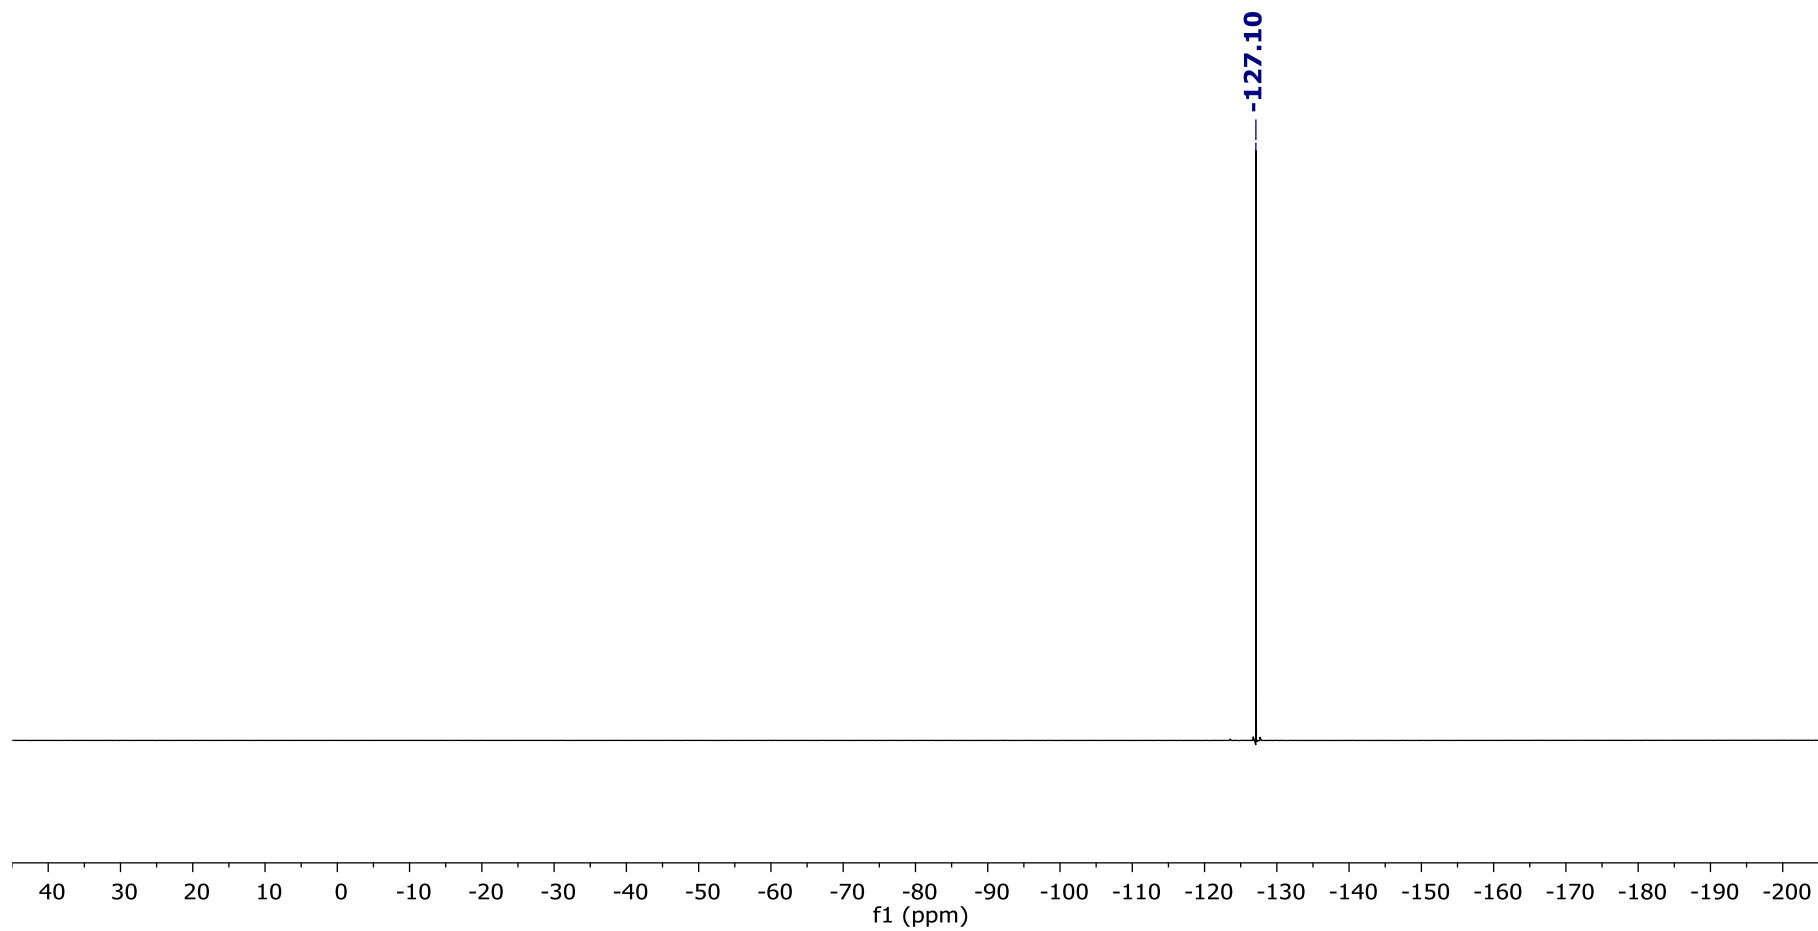

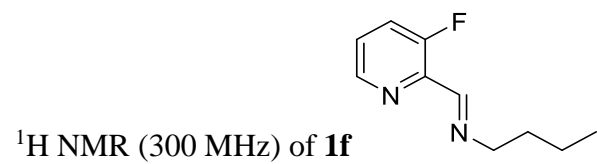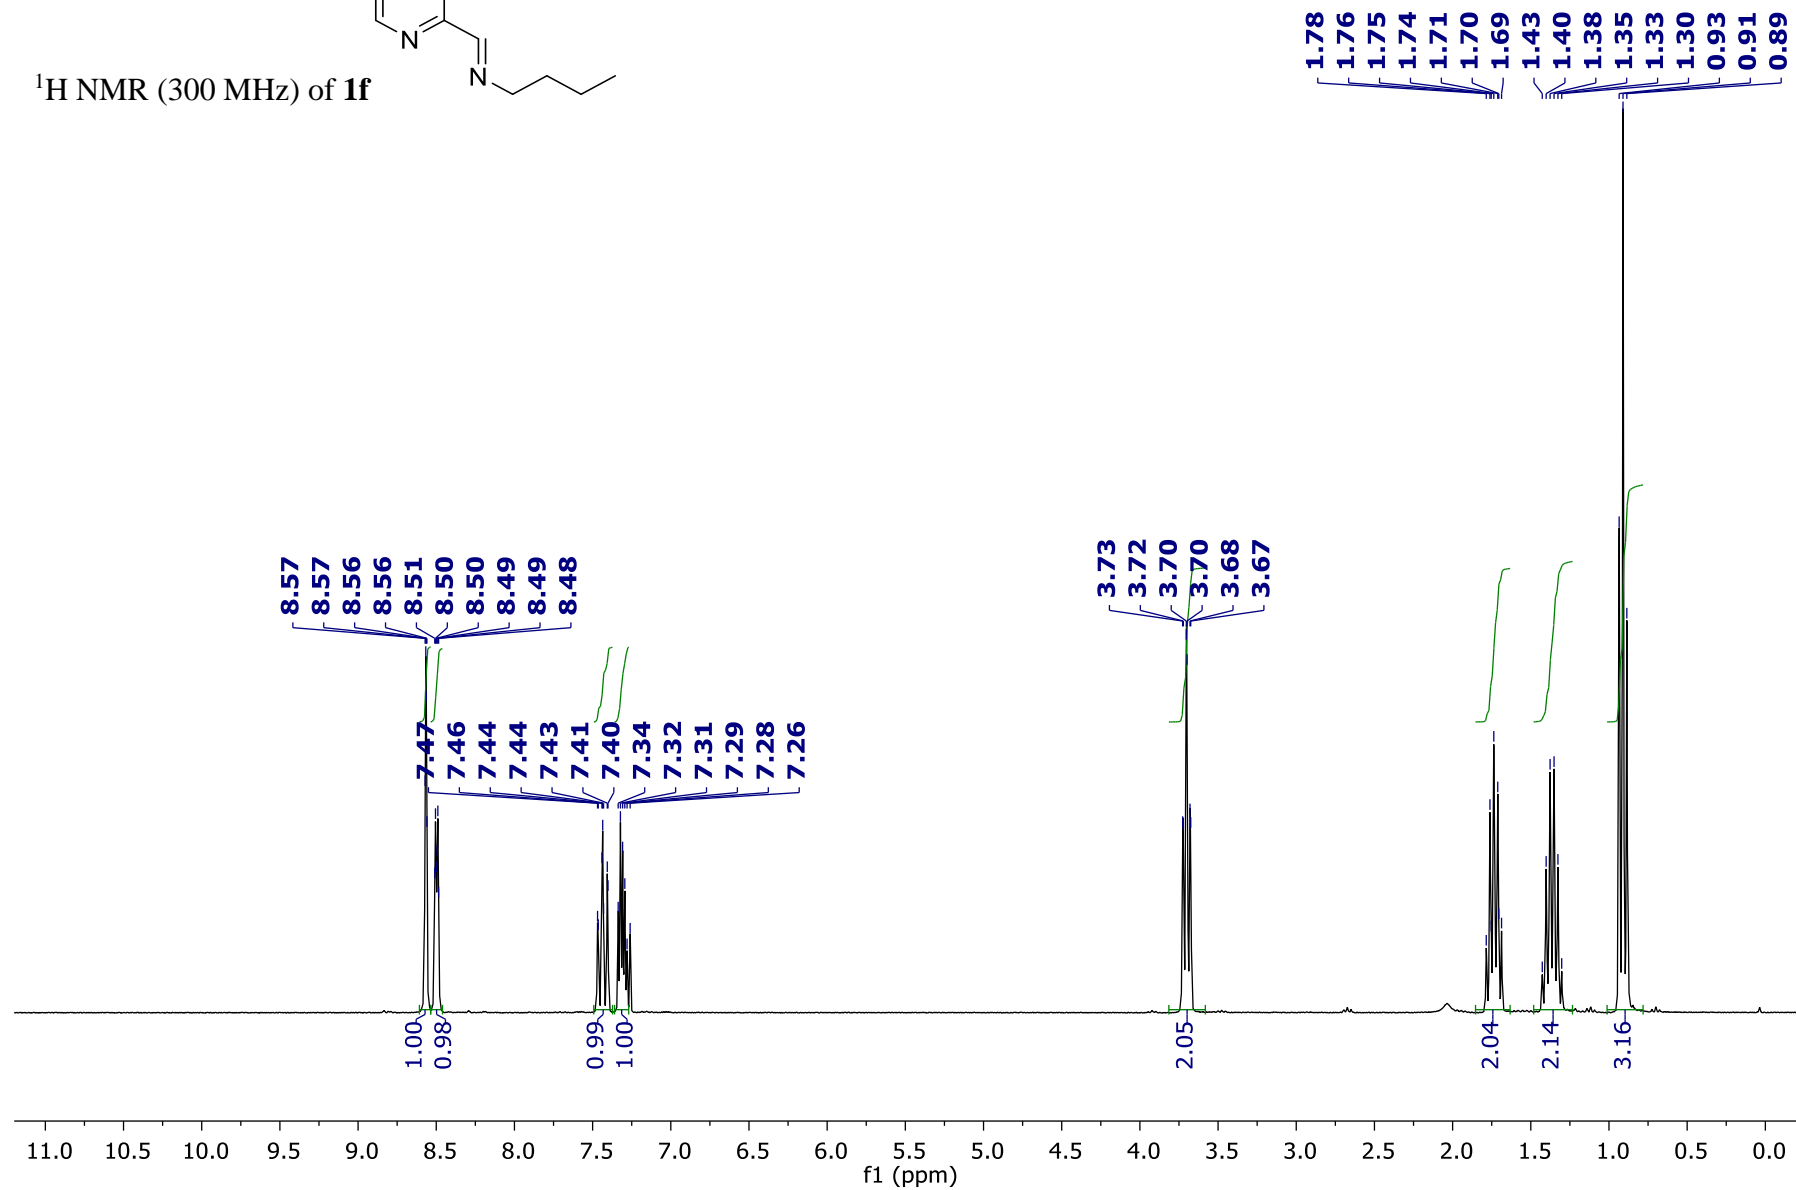

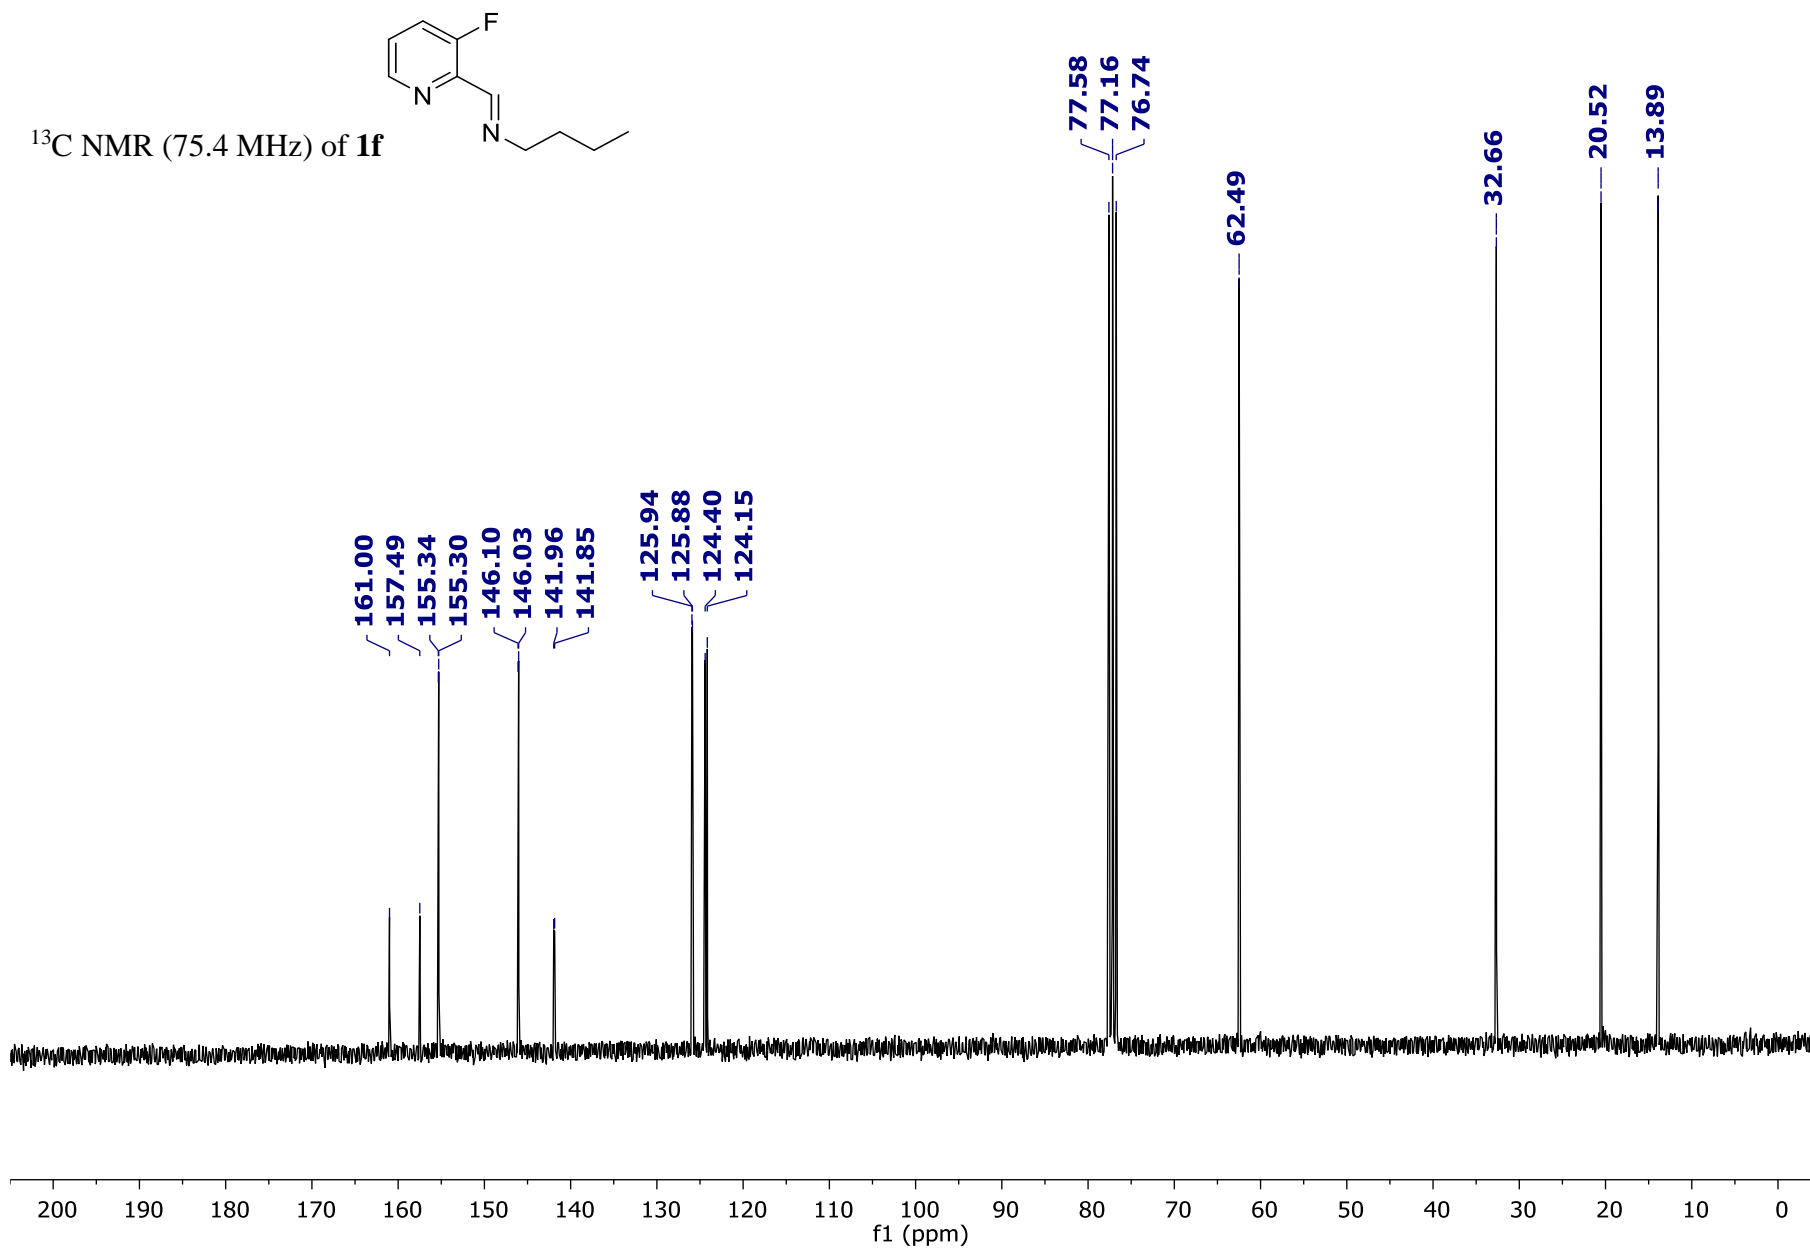



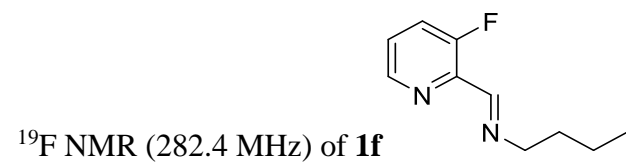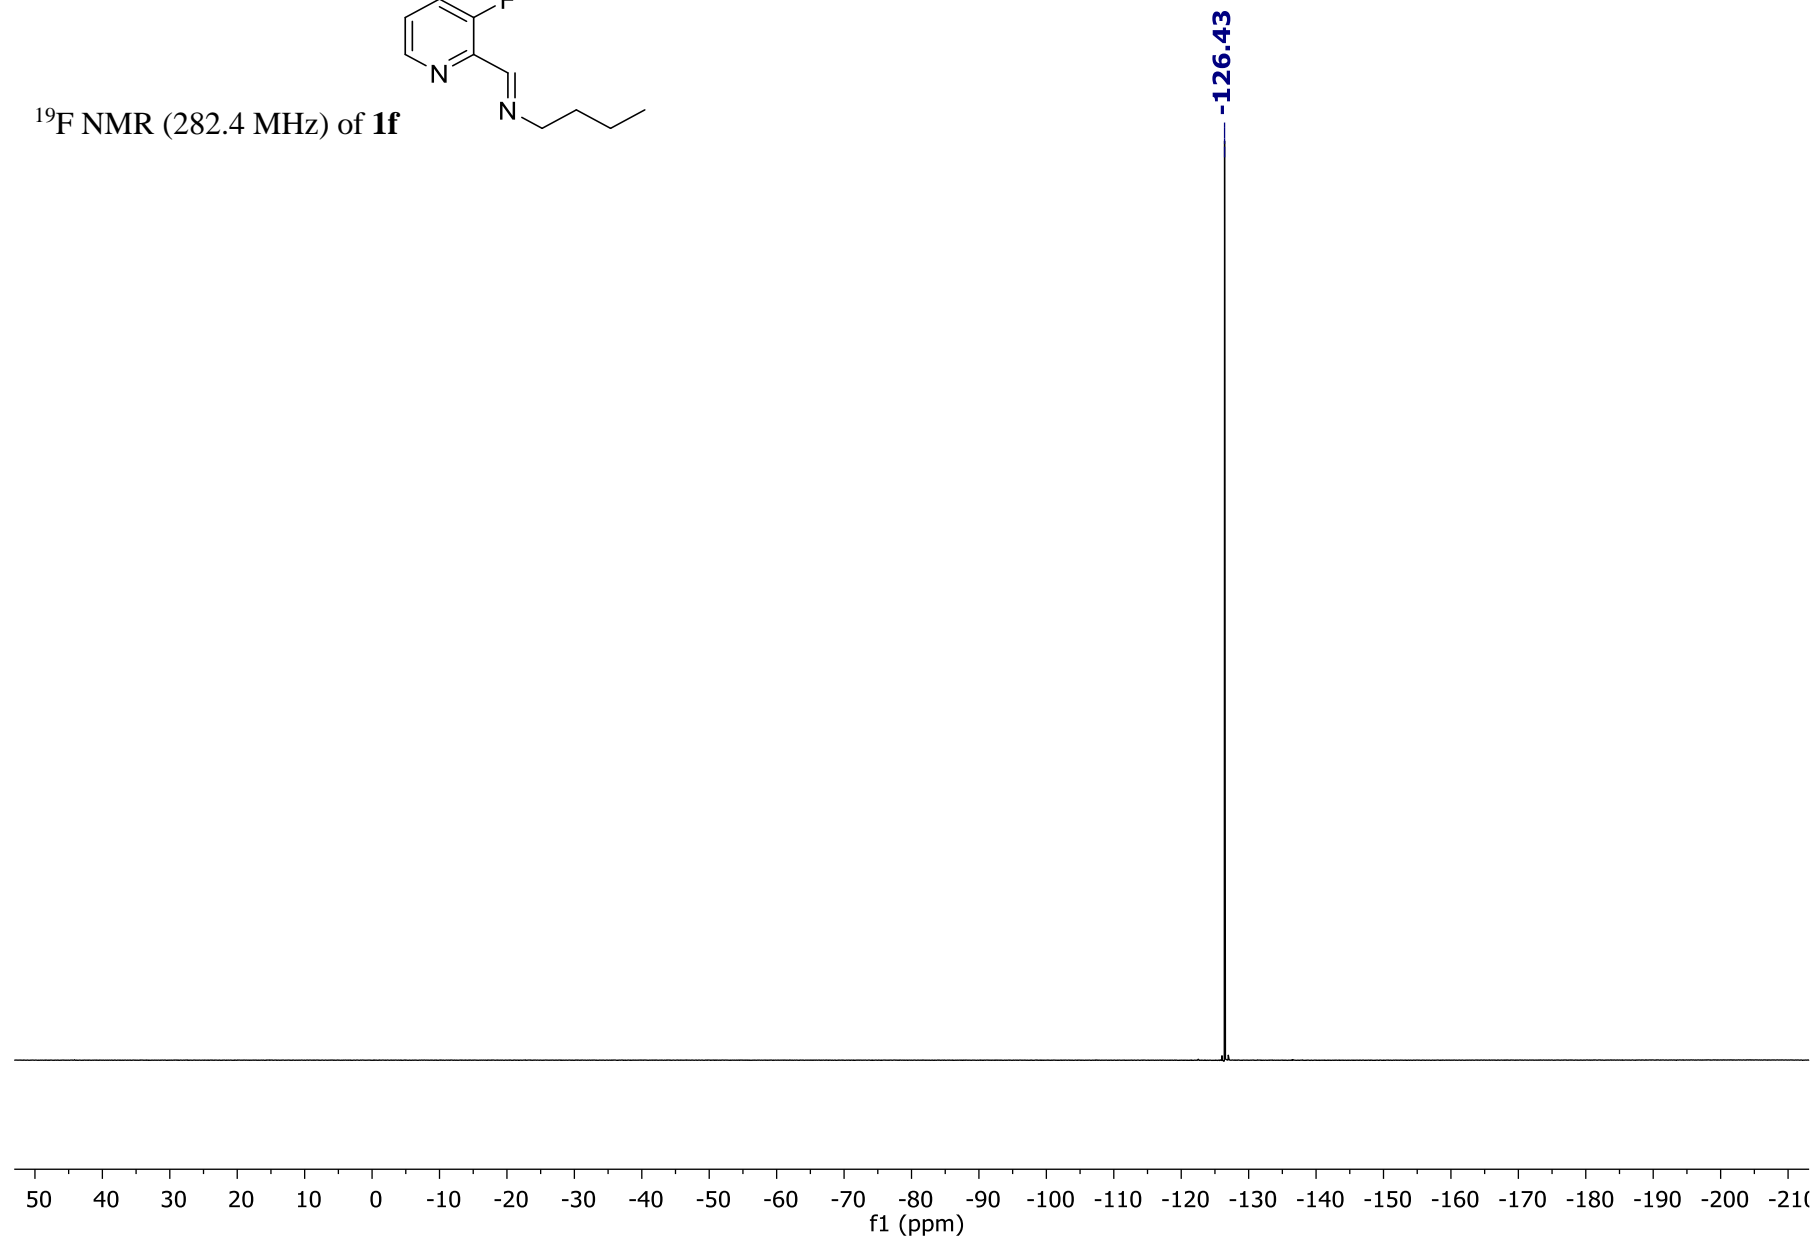

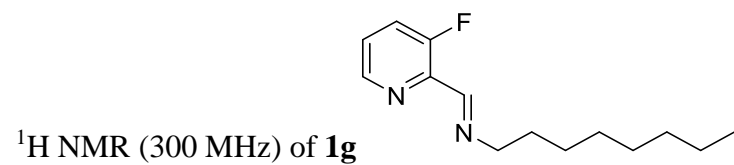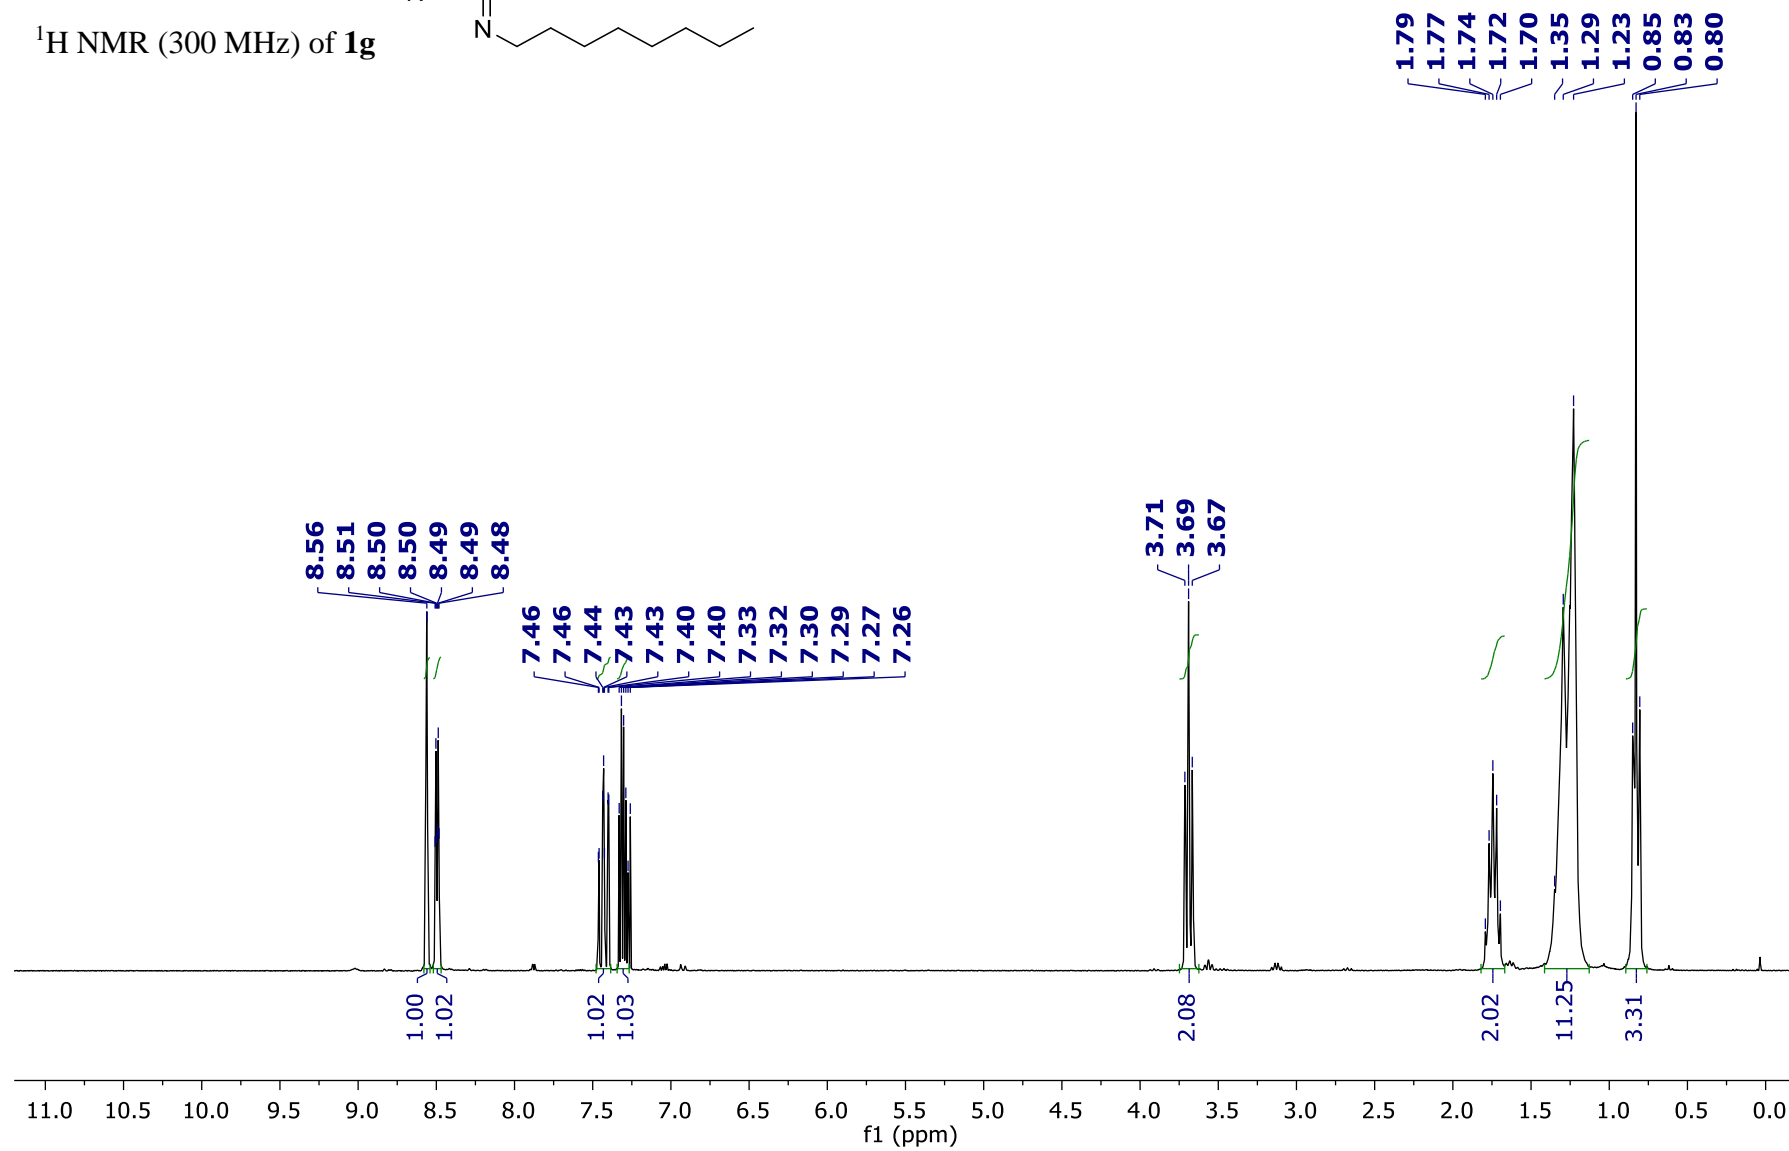

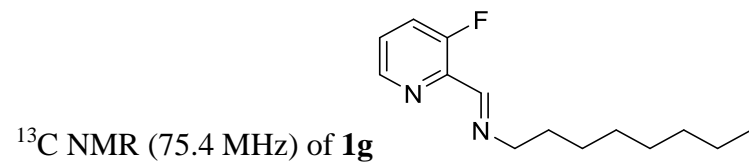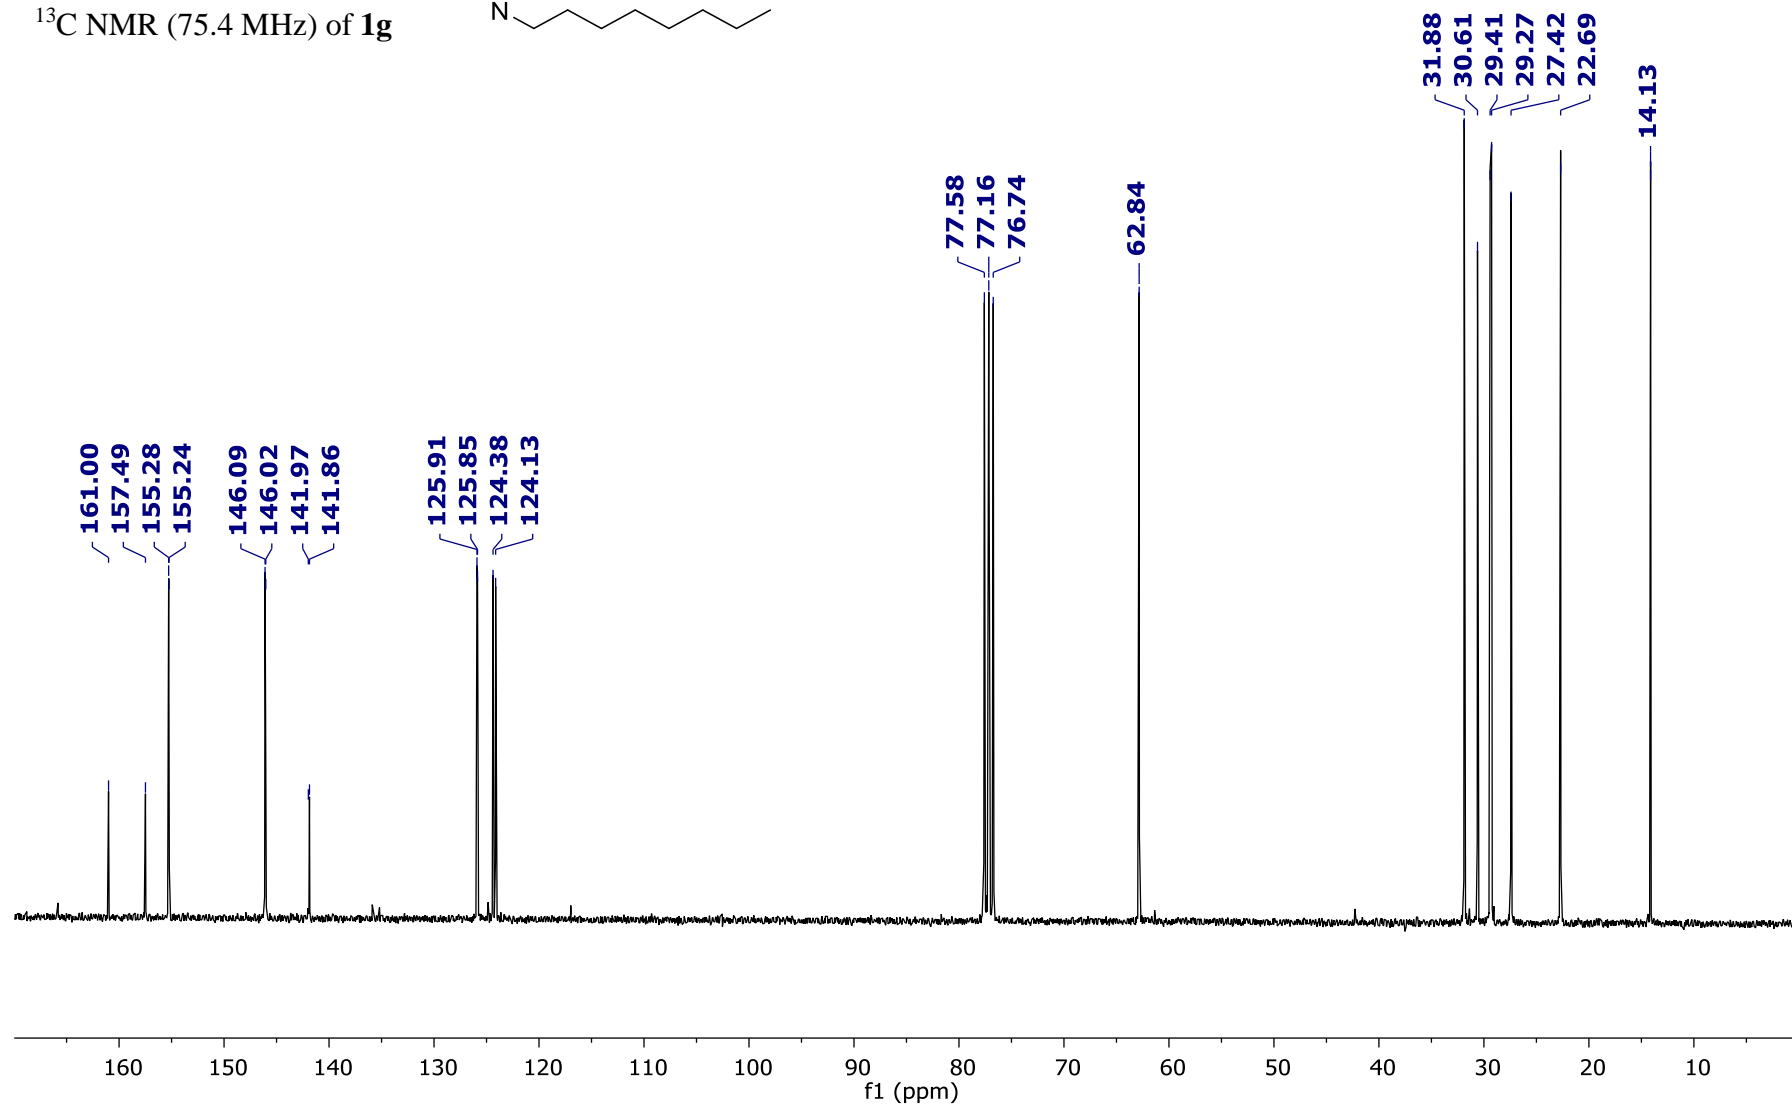

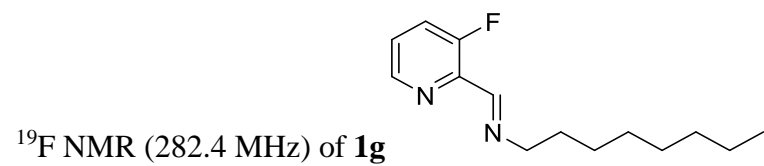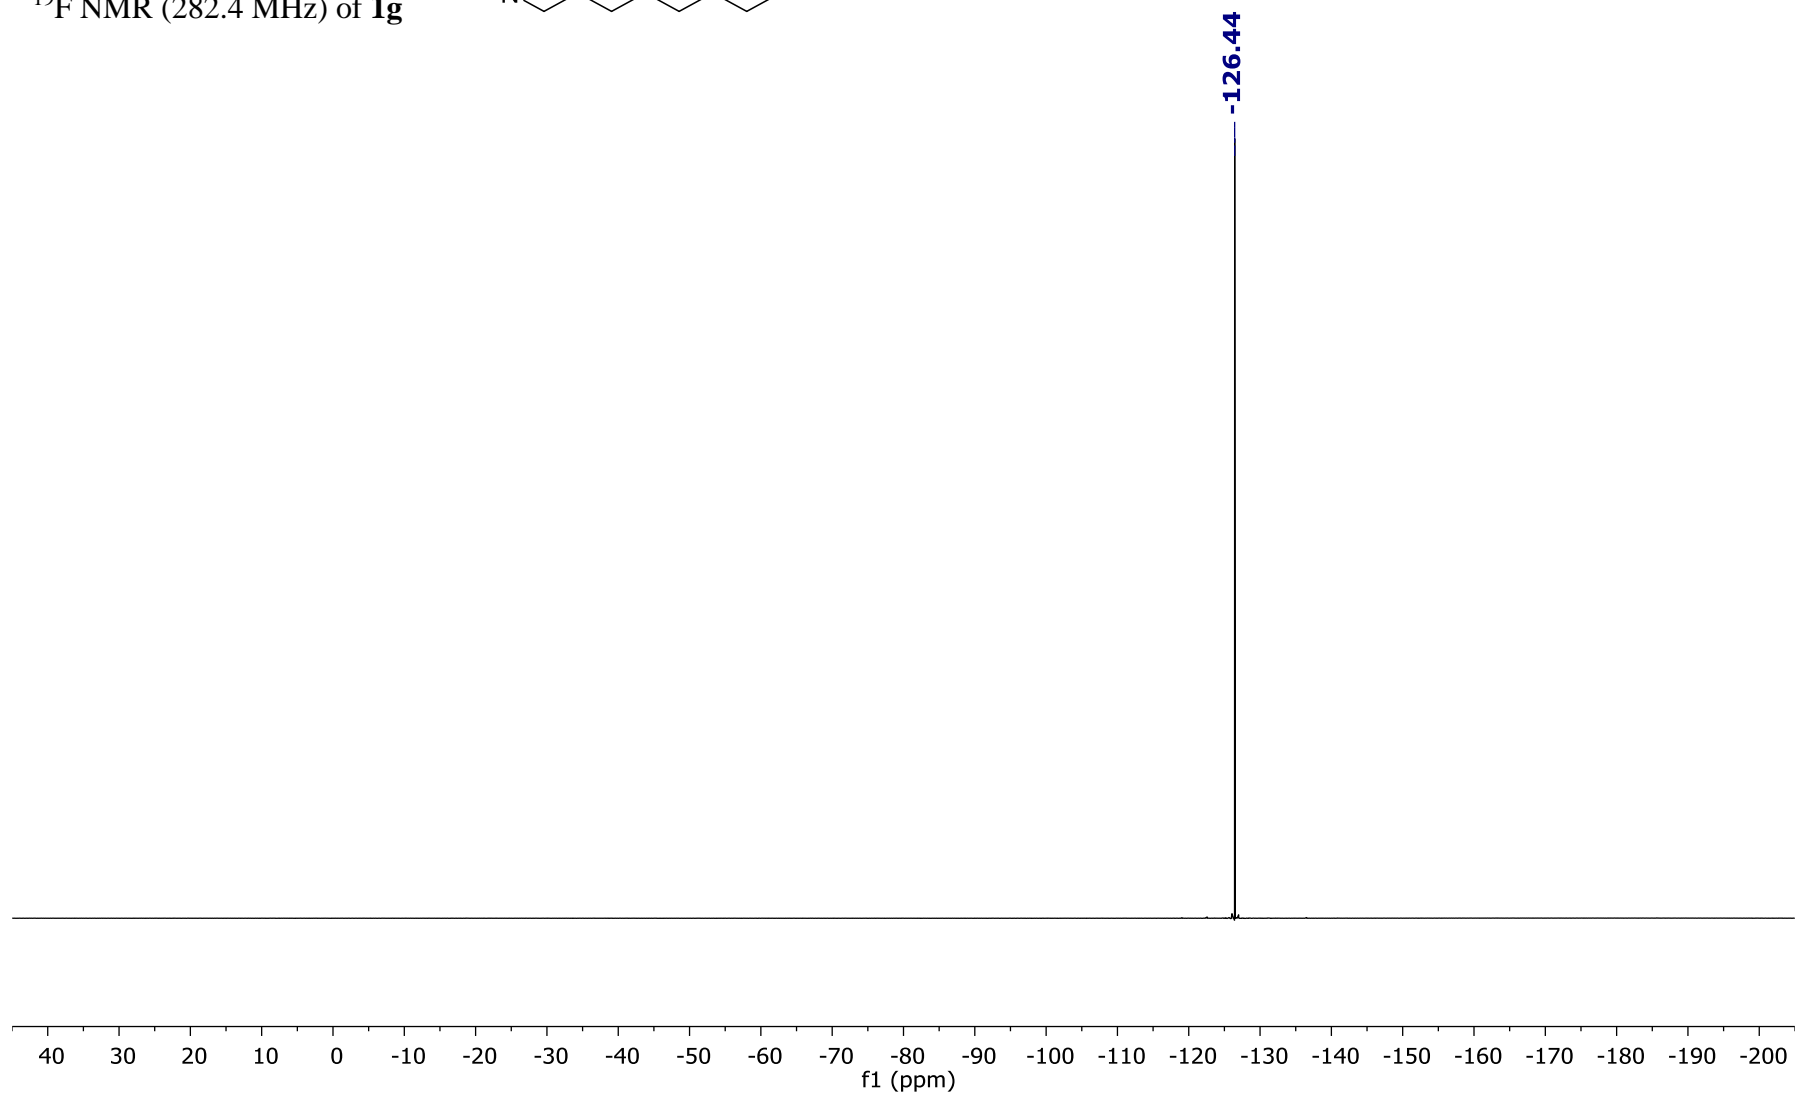

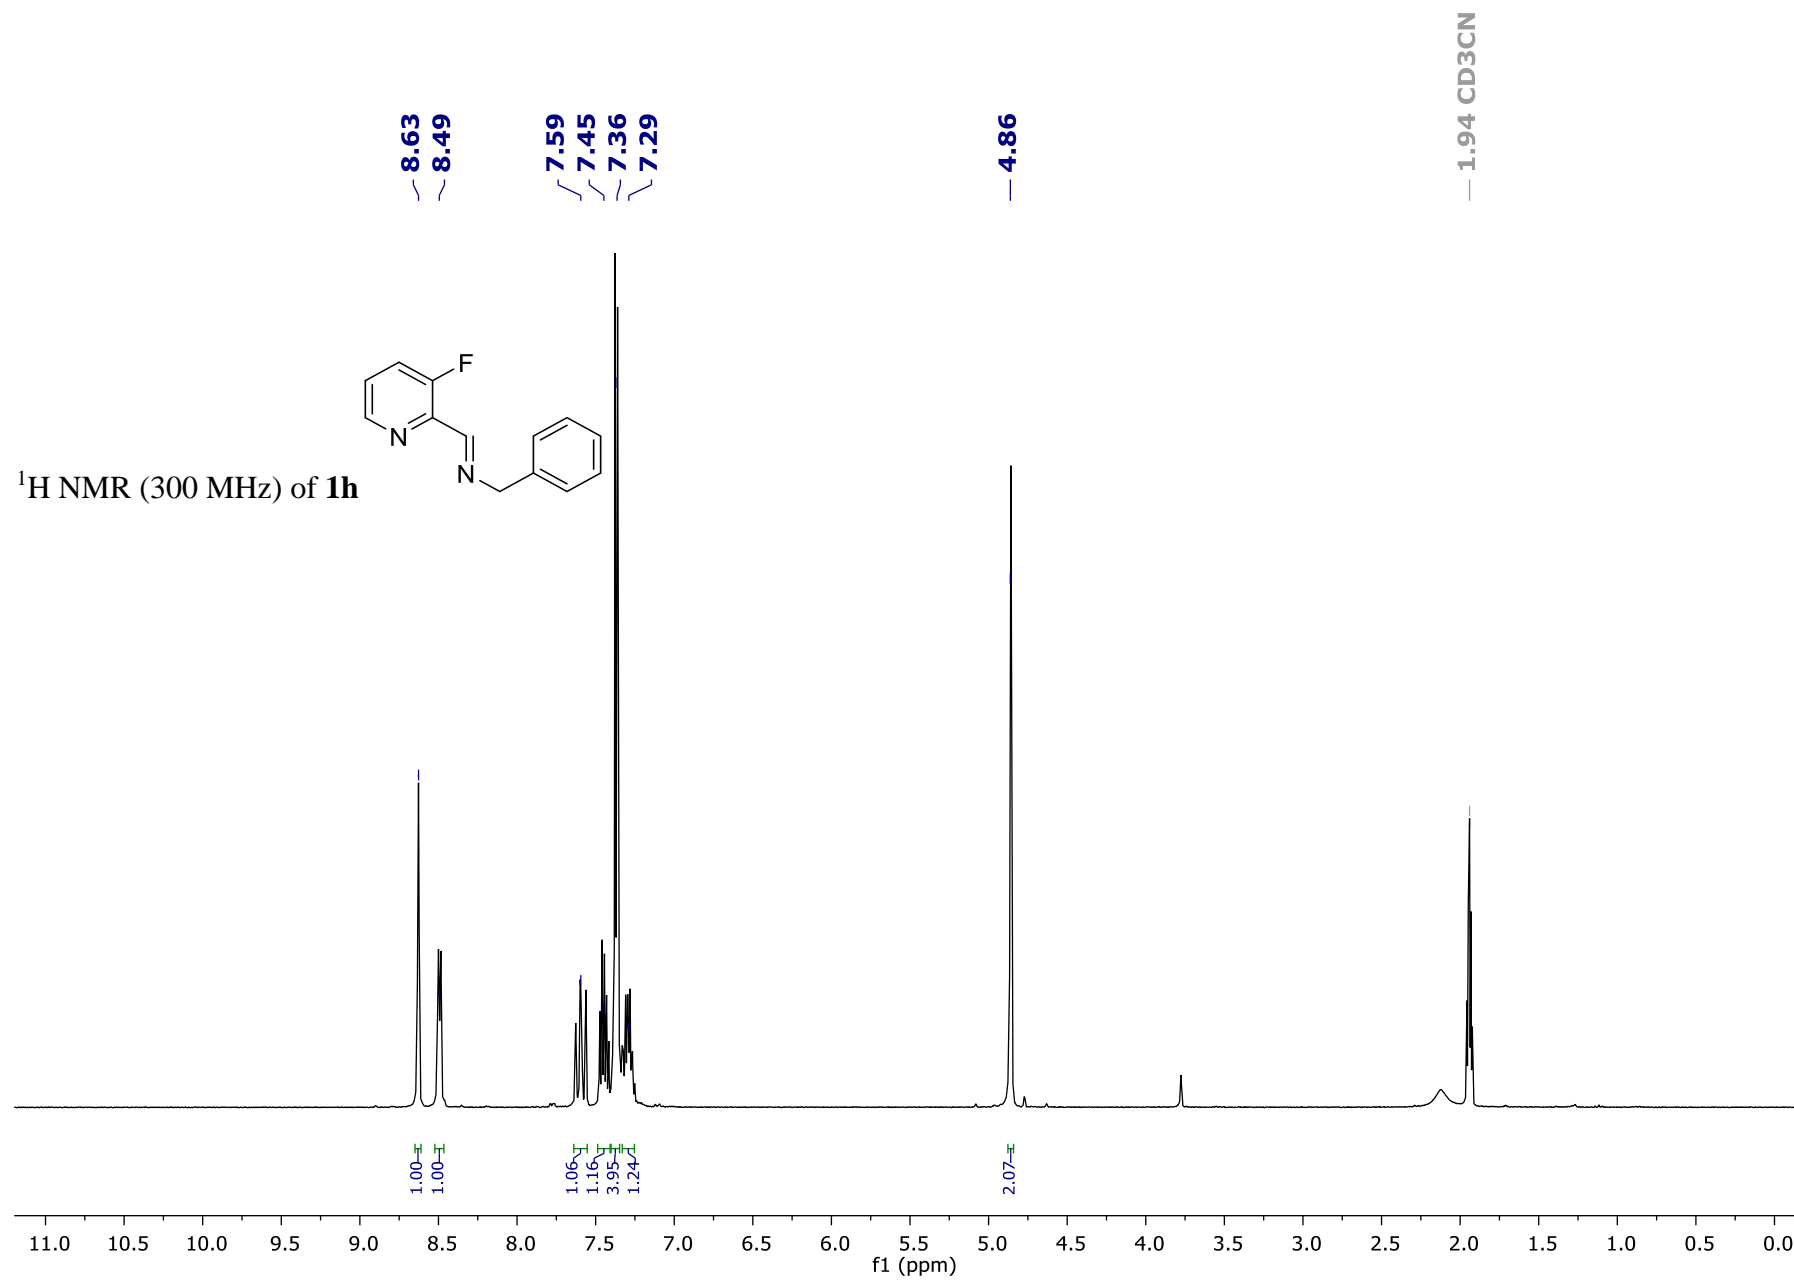

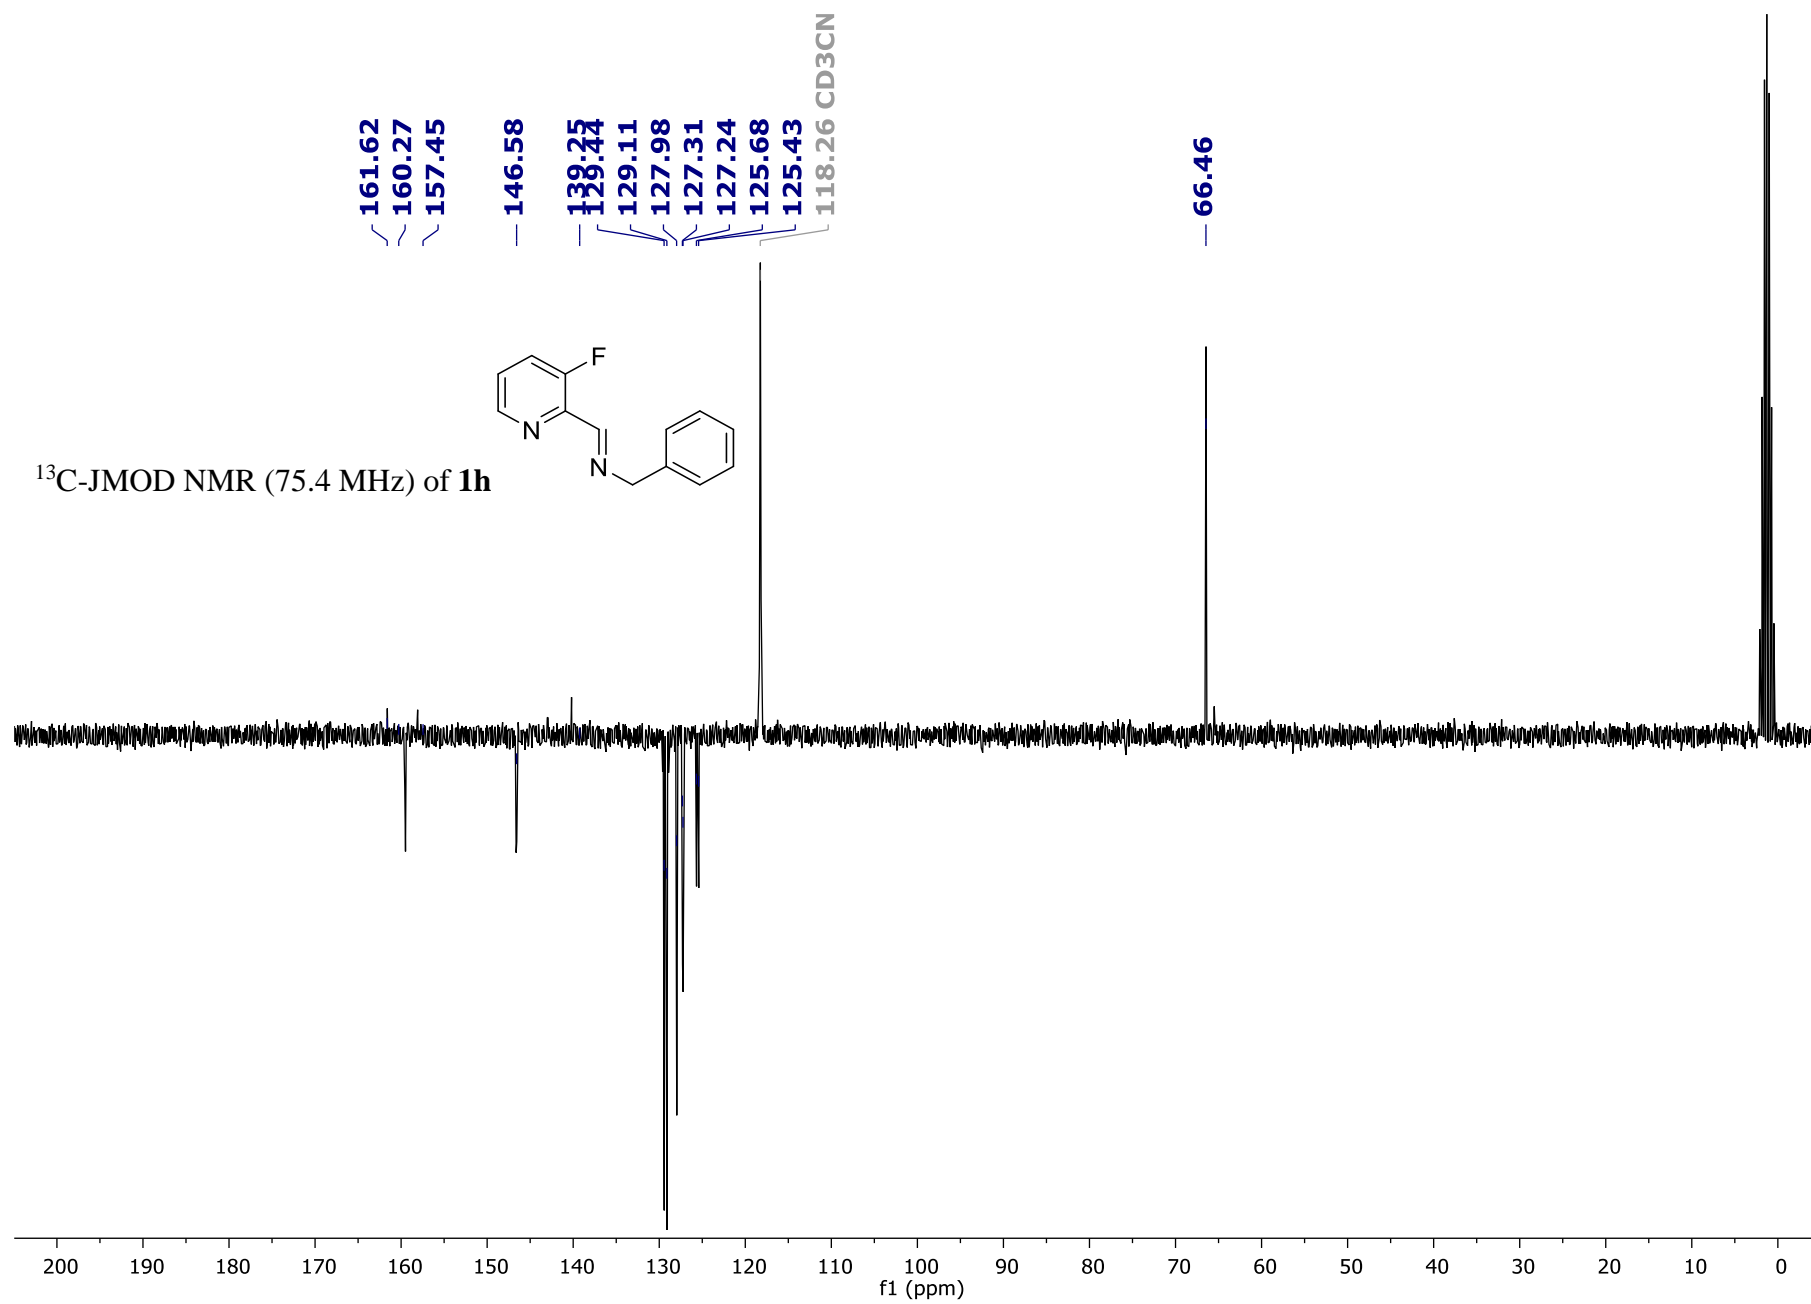

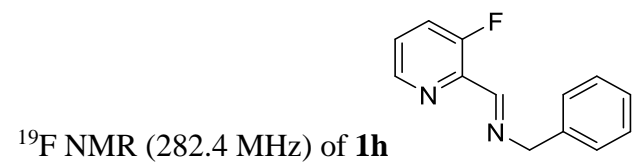

-124.74

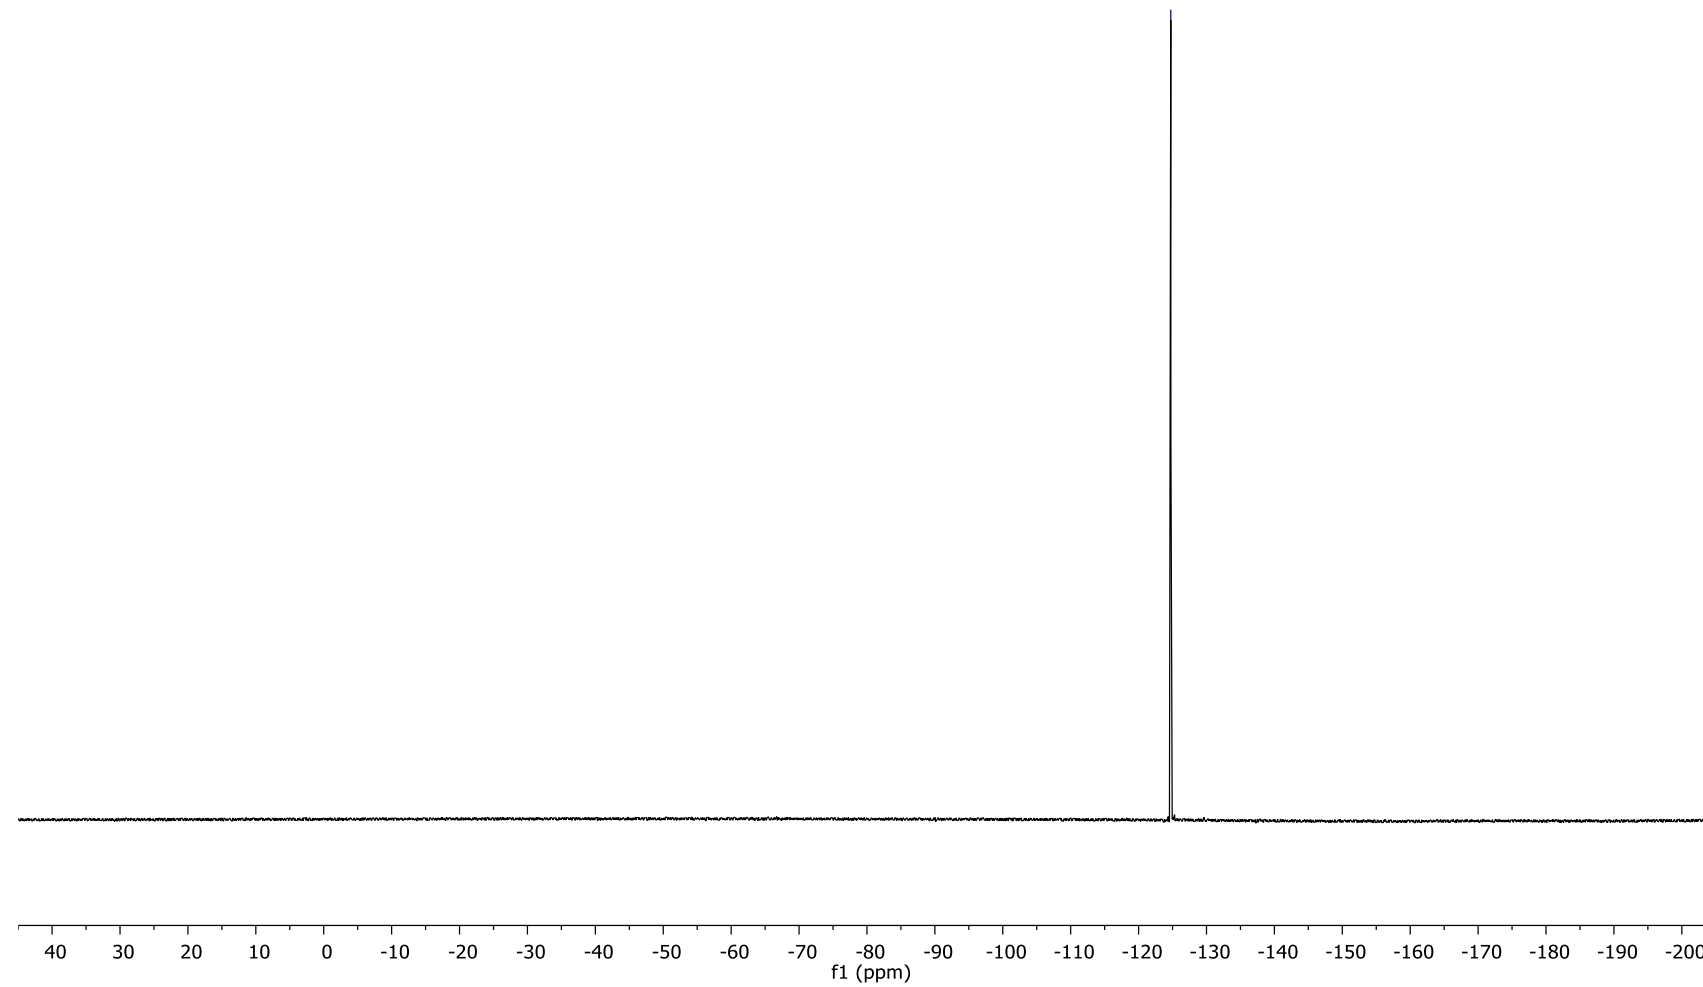

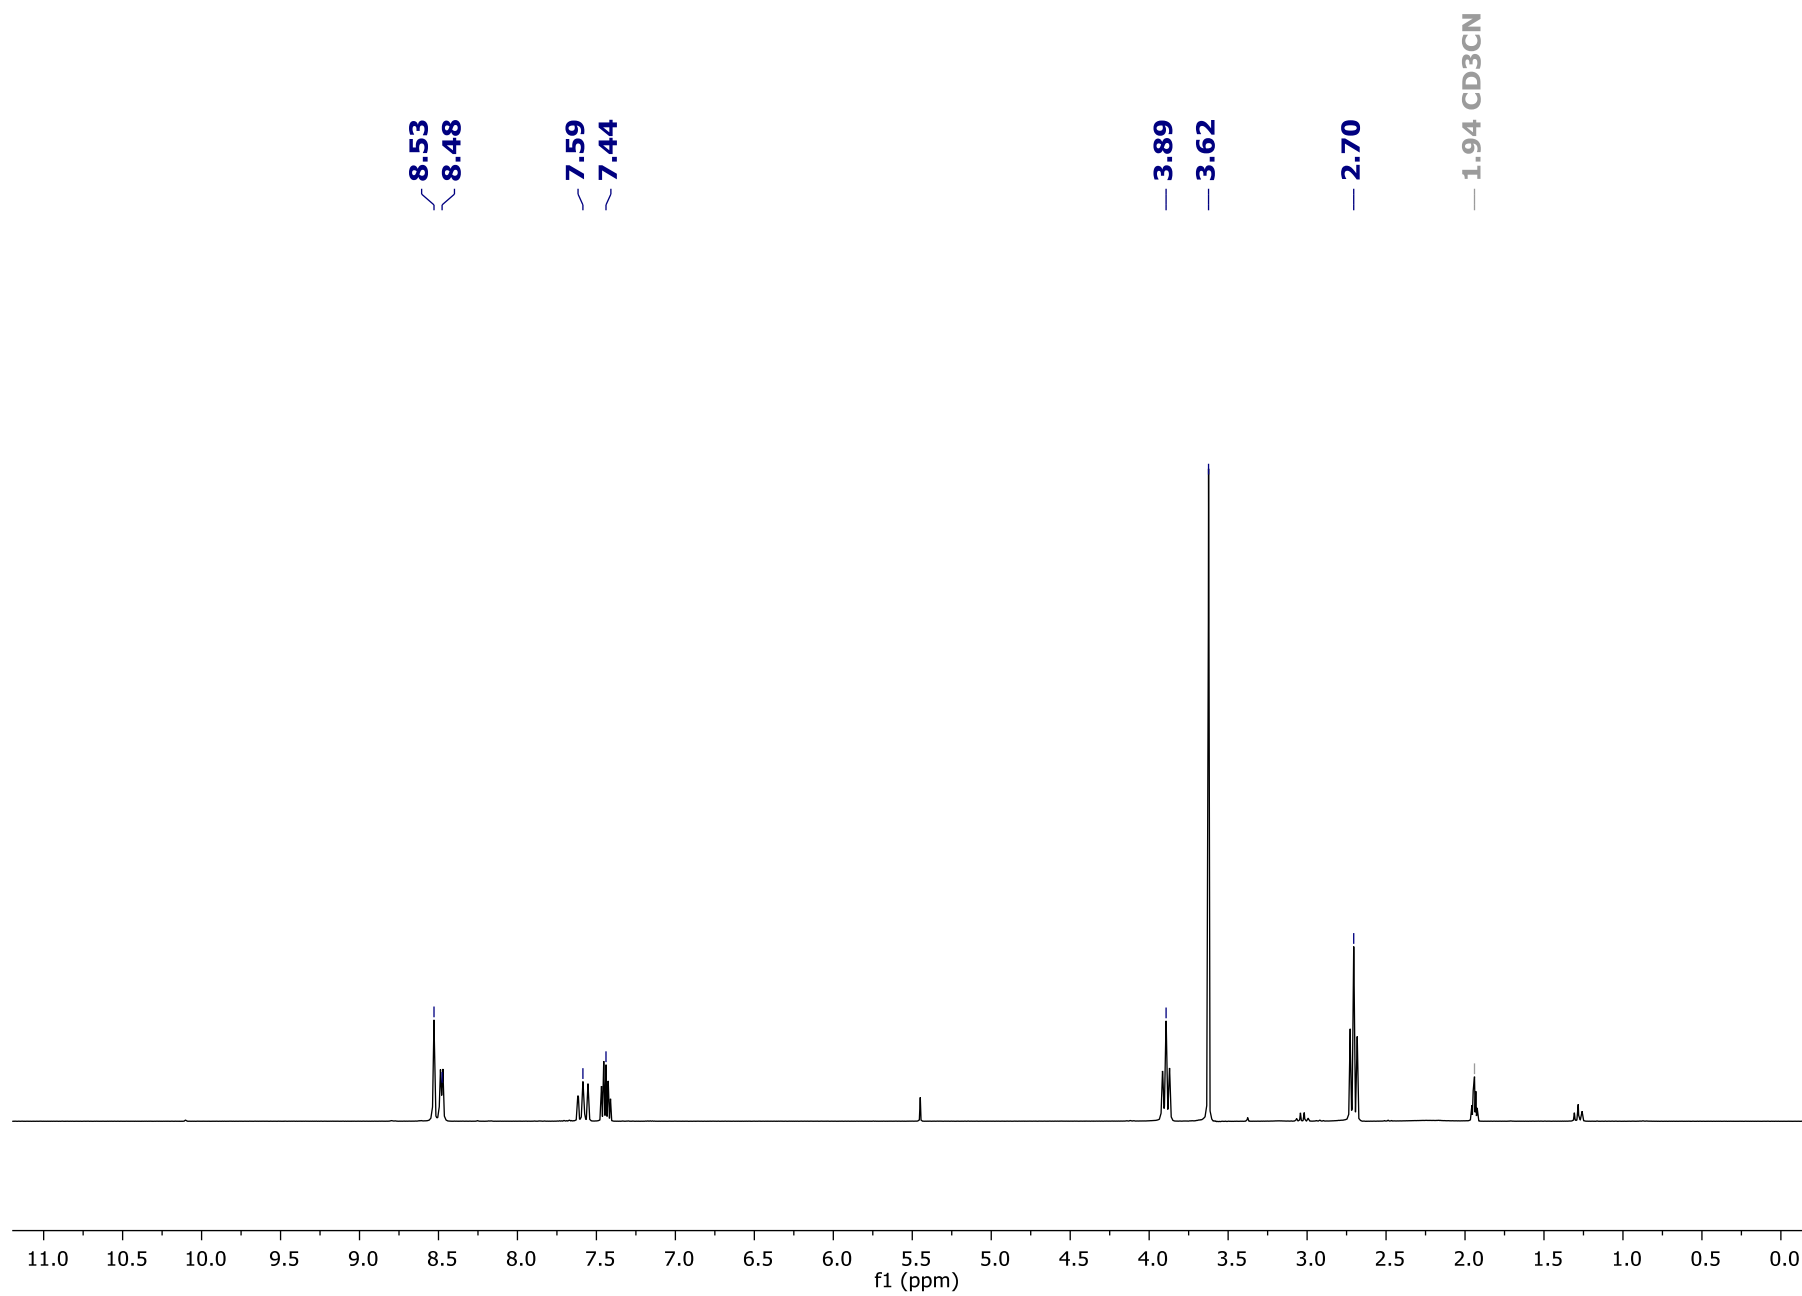



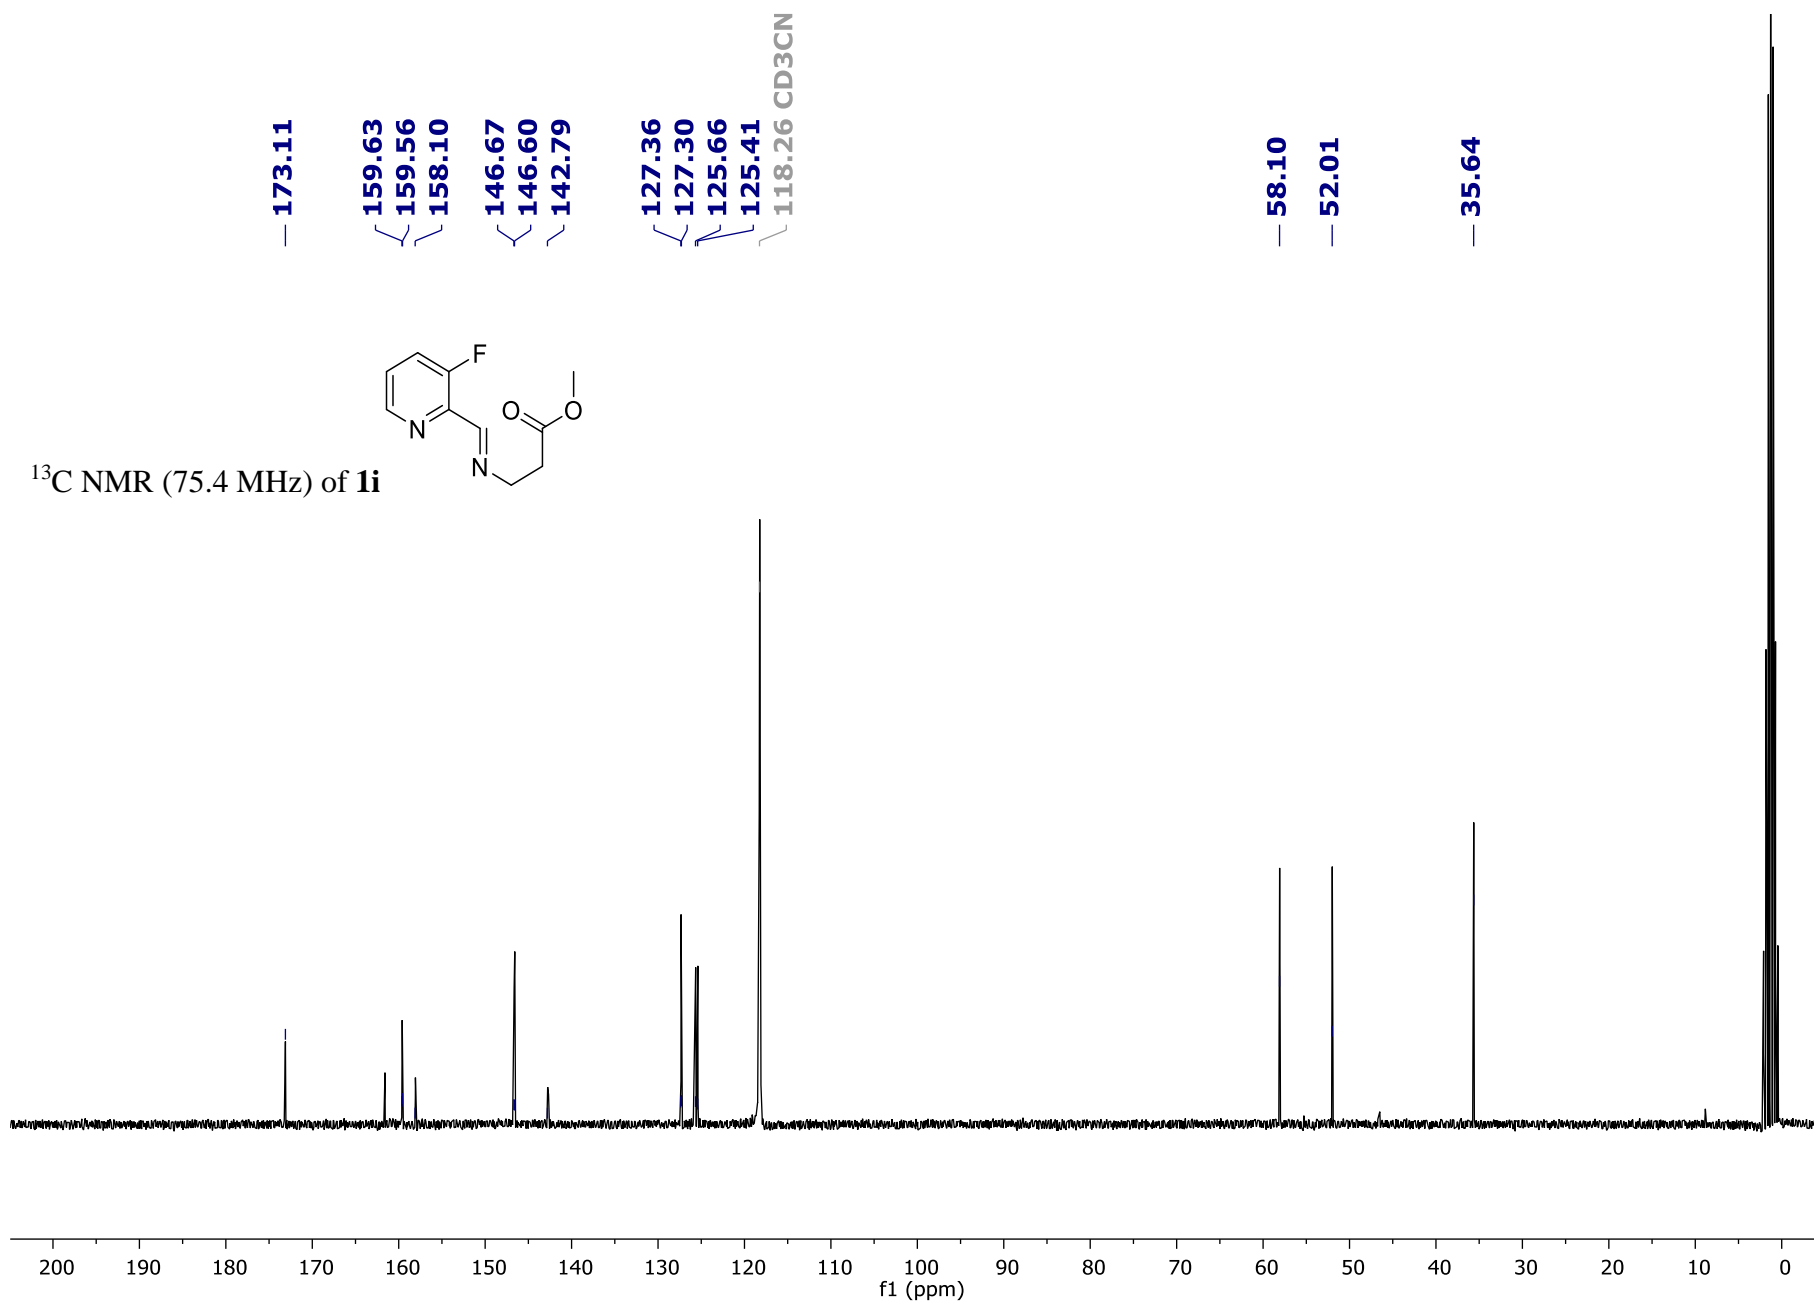

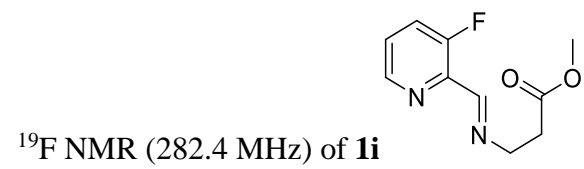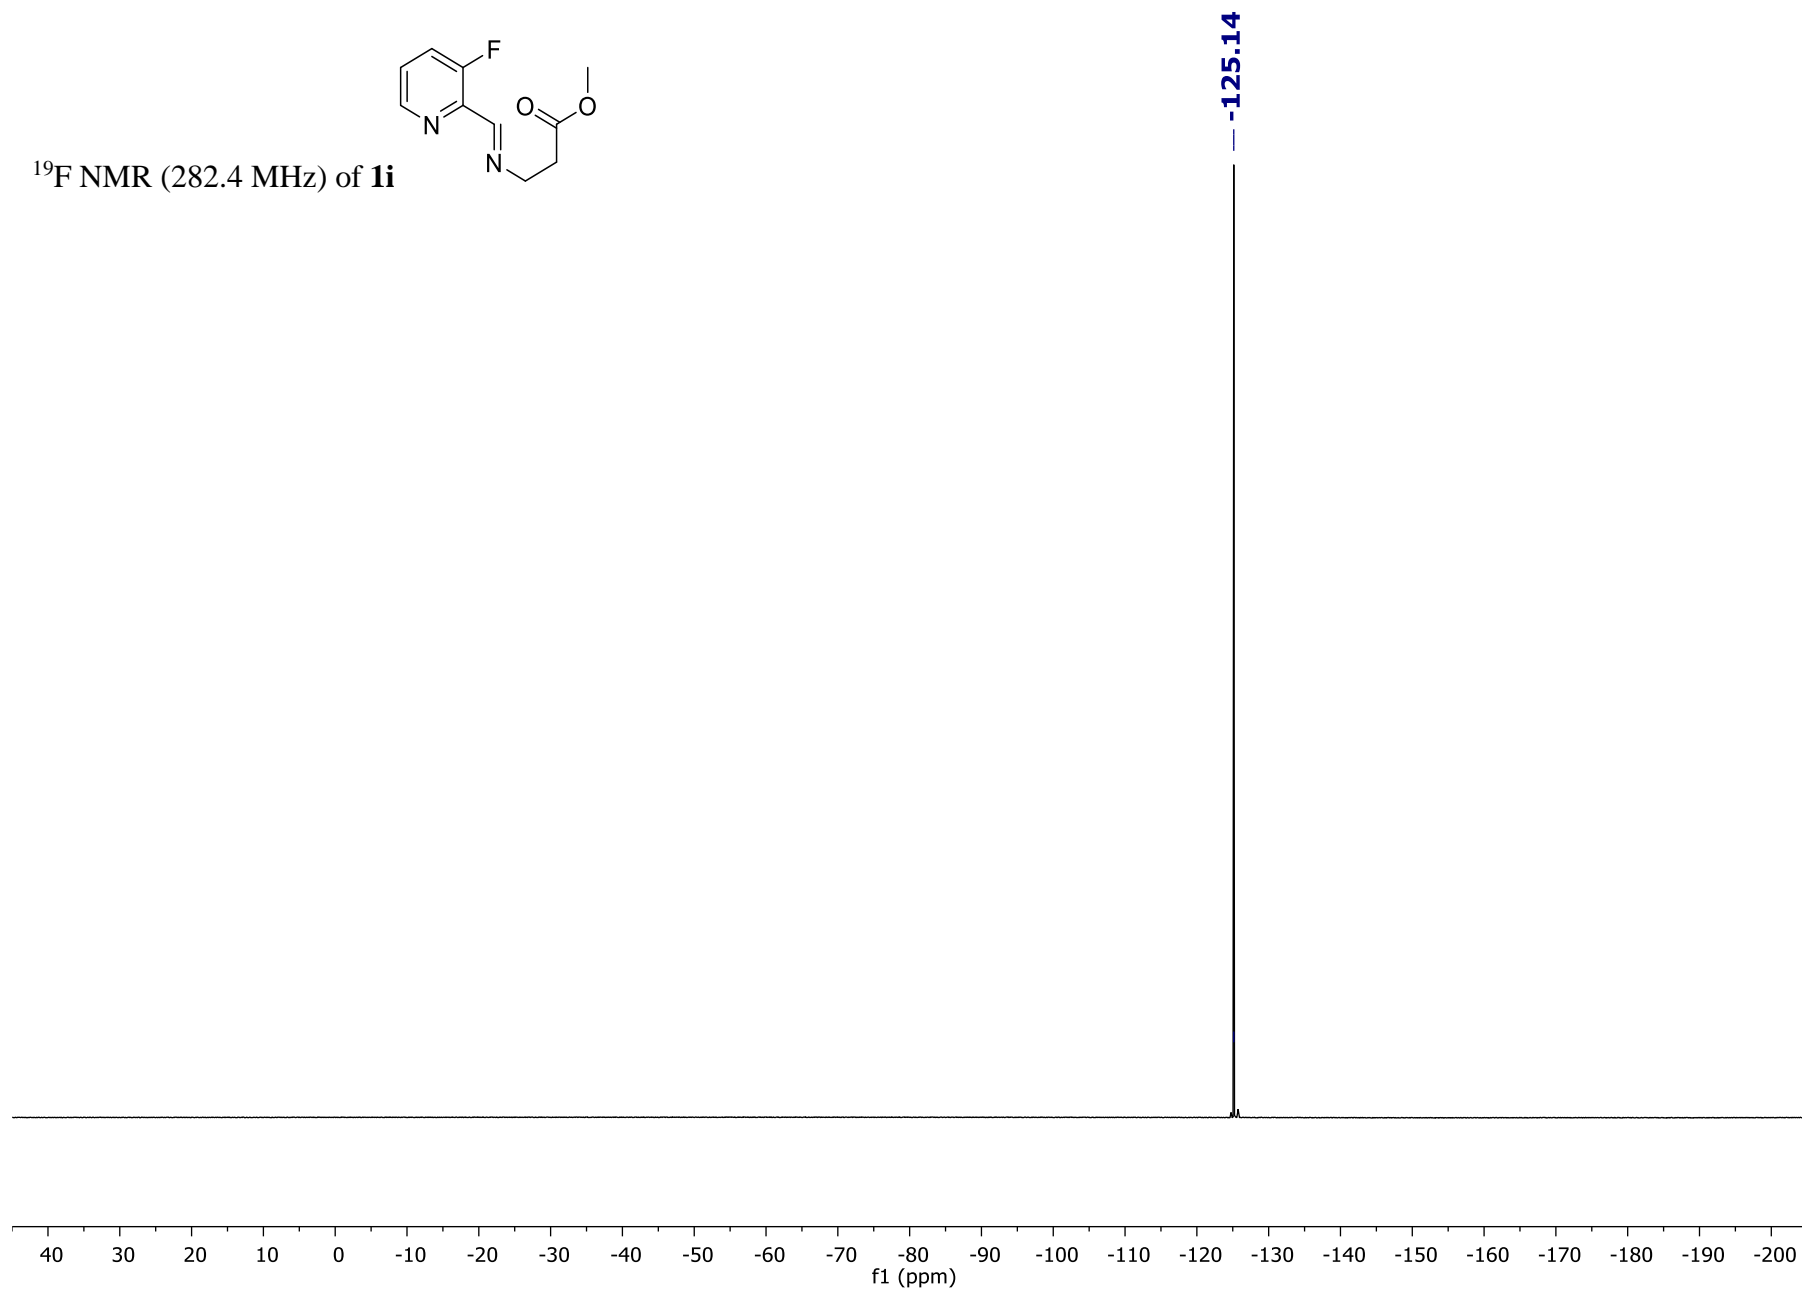

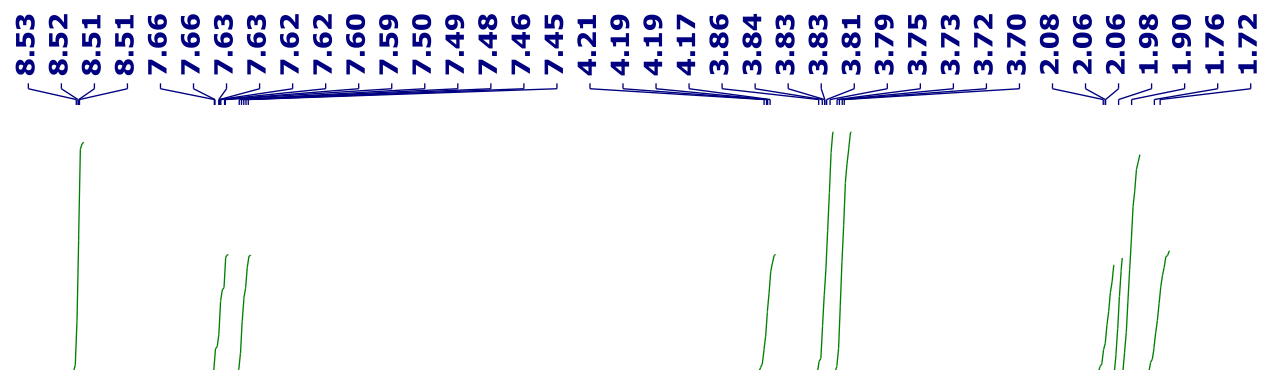

<sup>1</sup>H NMR (300 MHz) of **1j**

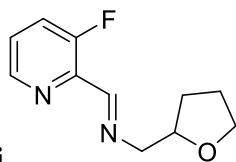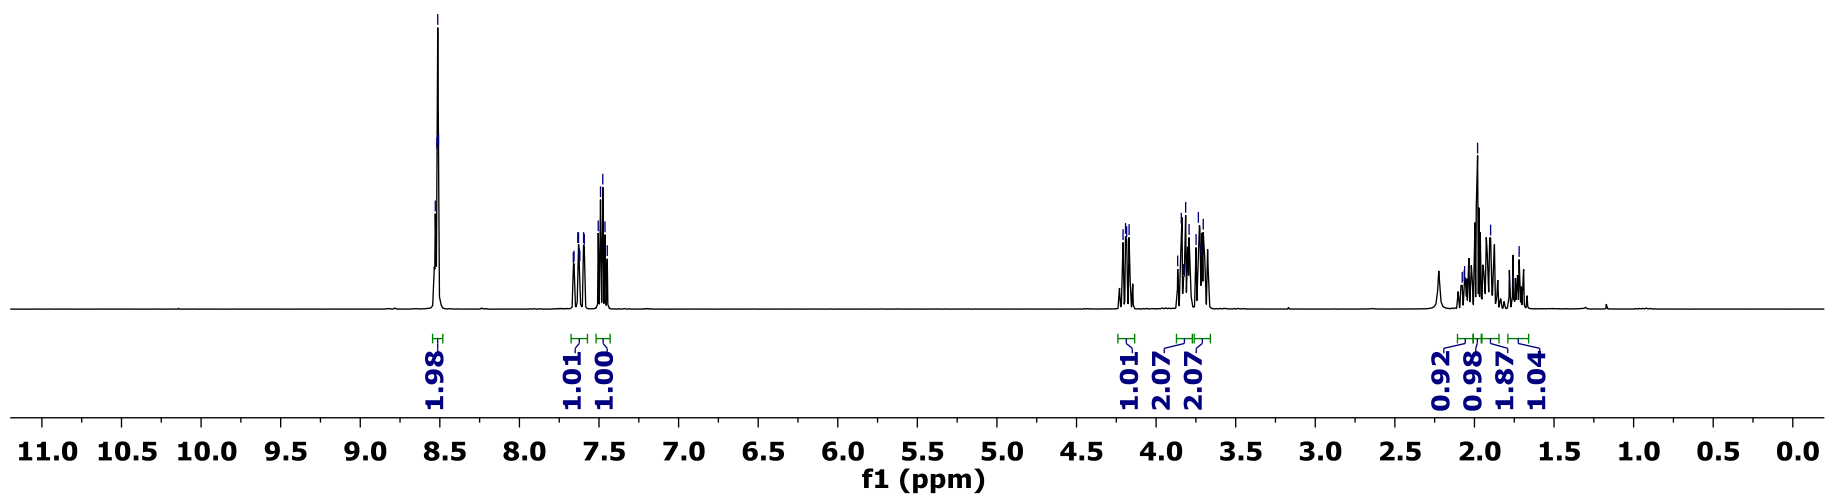

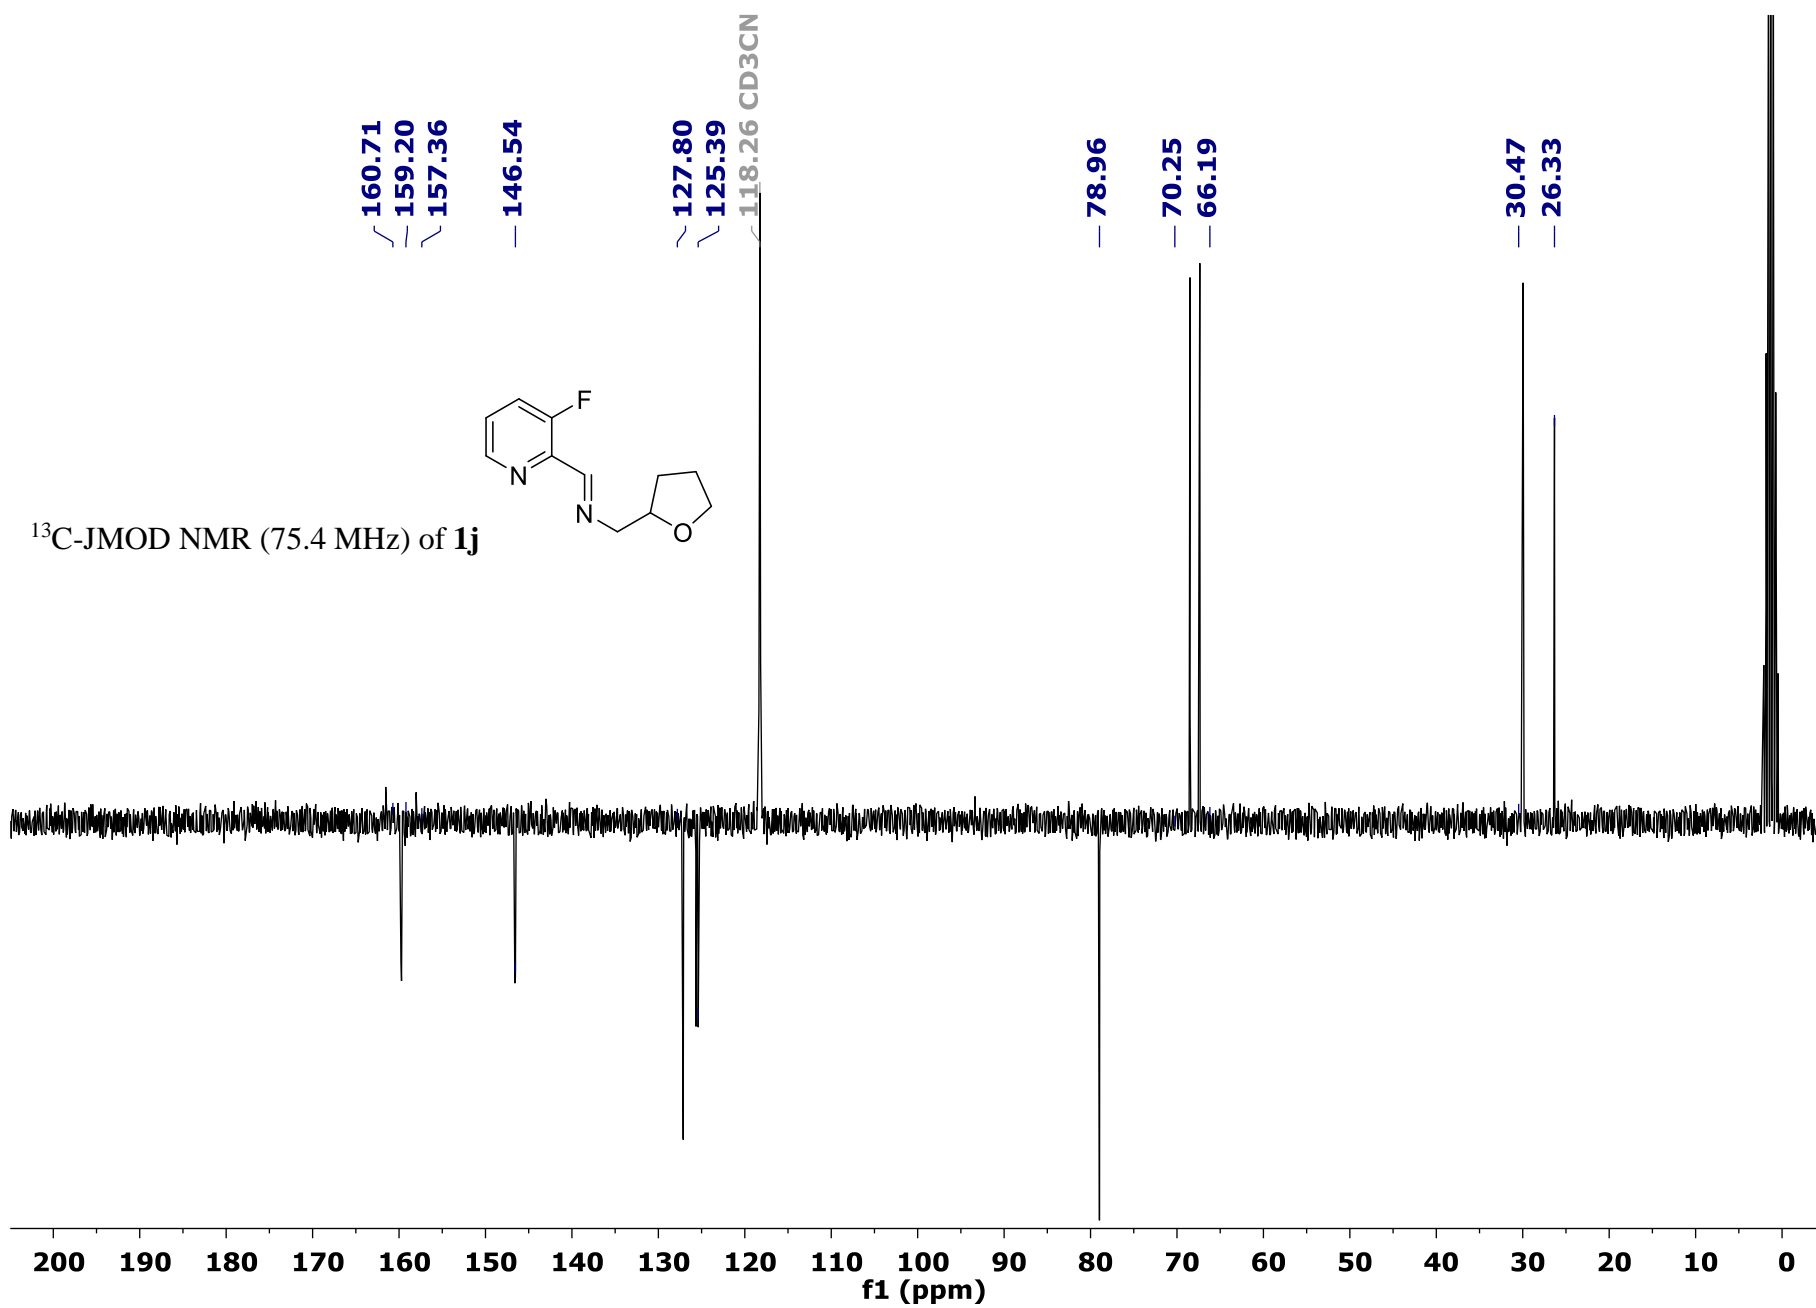

$^{19}\text{F}$  NMR (282.4 MHz) of **1j**

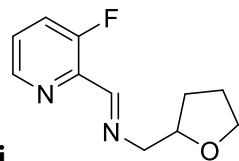

— -125.69

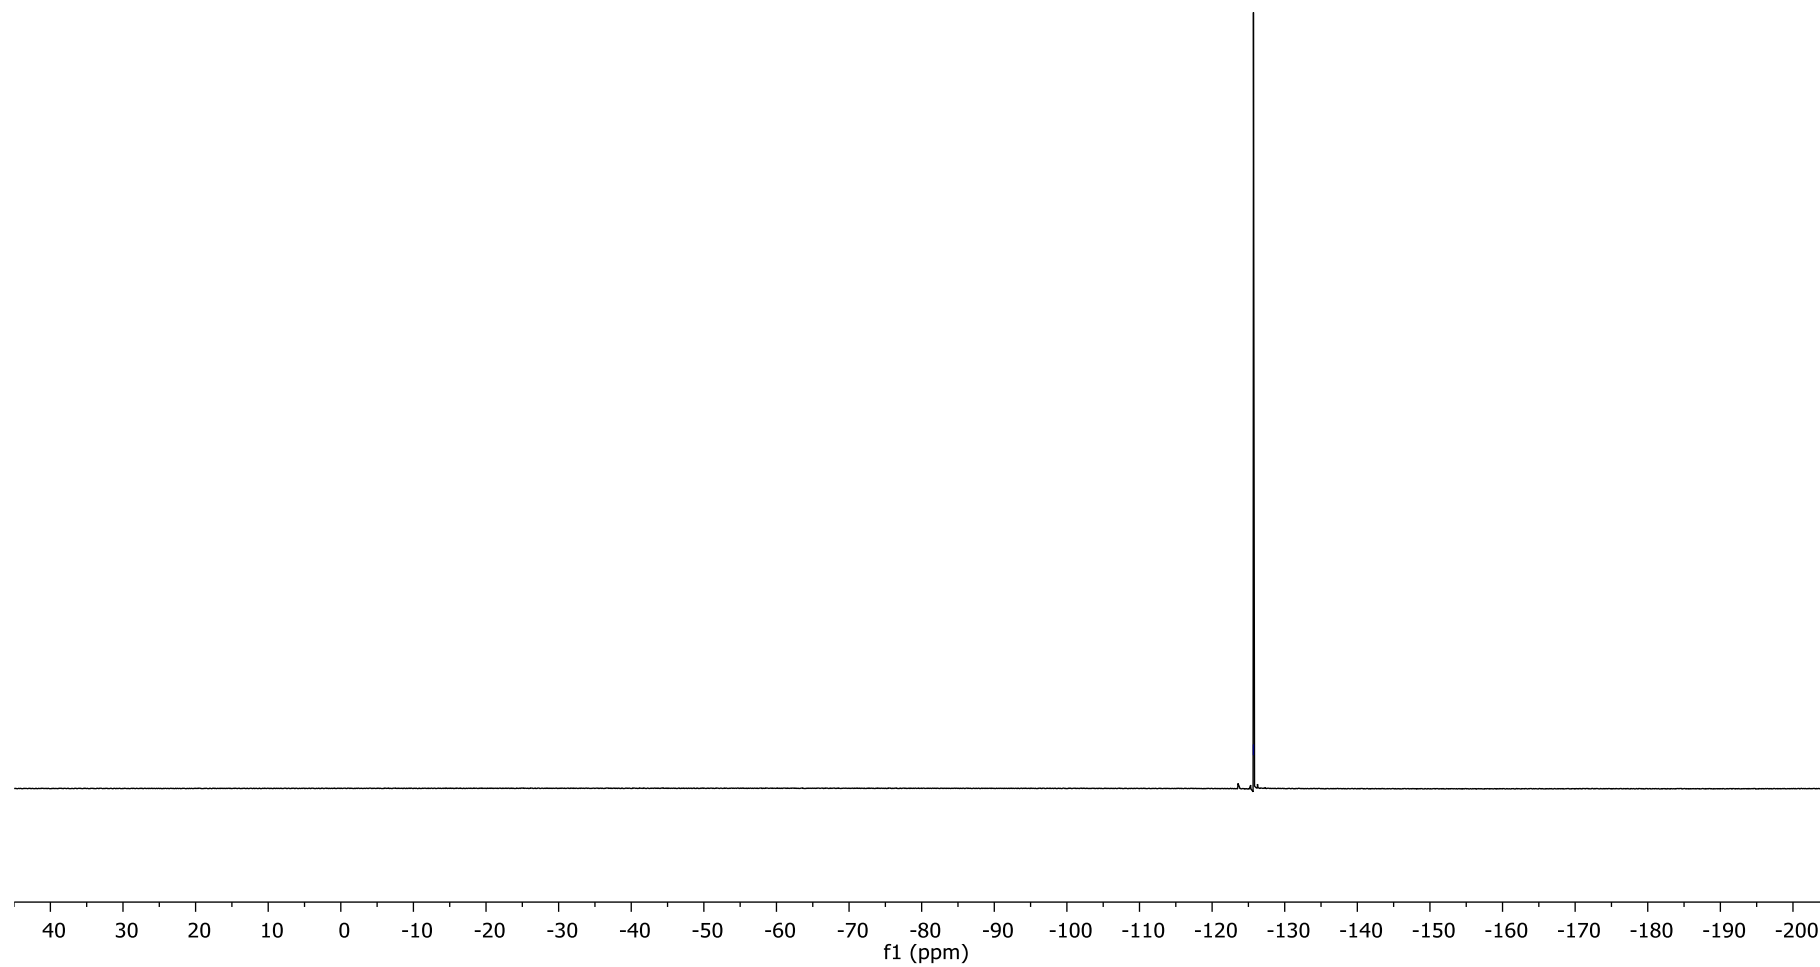

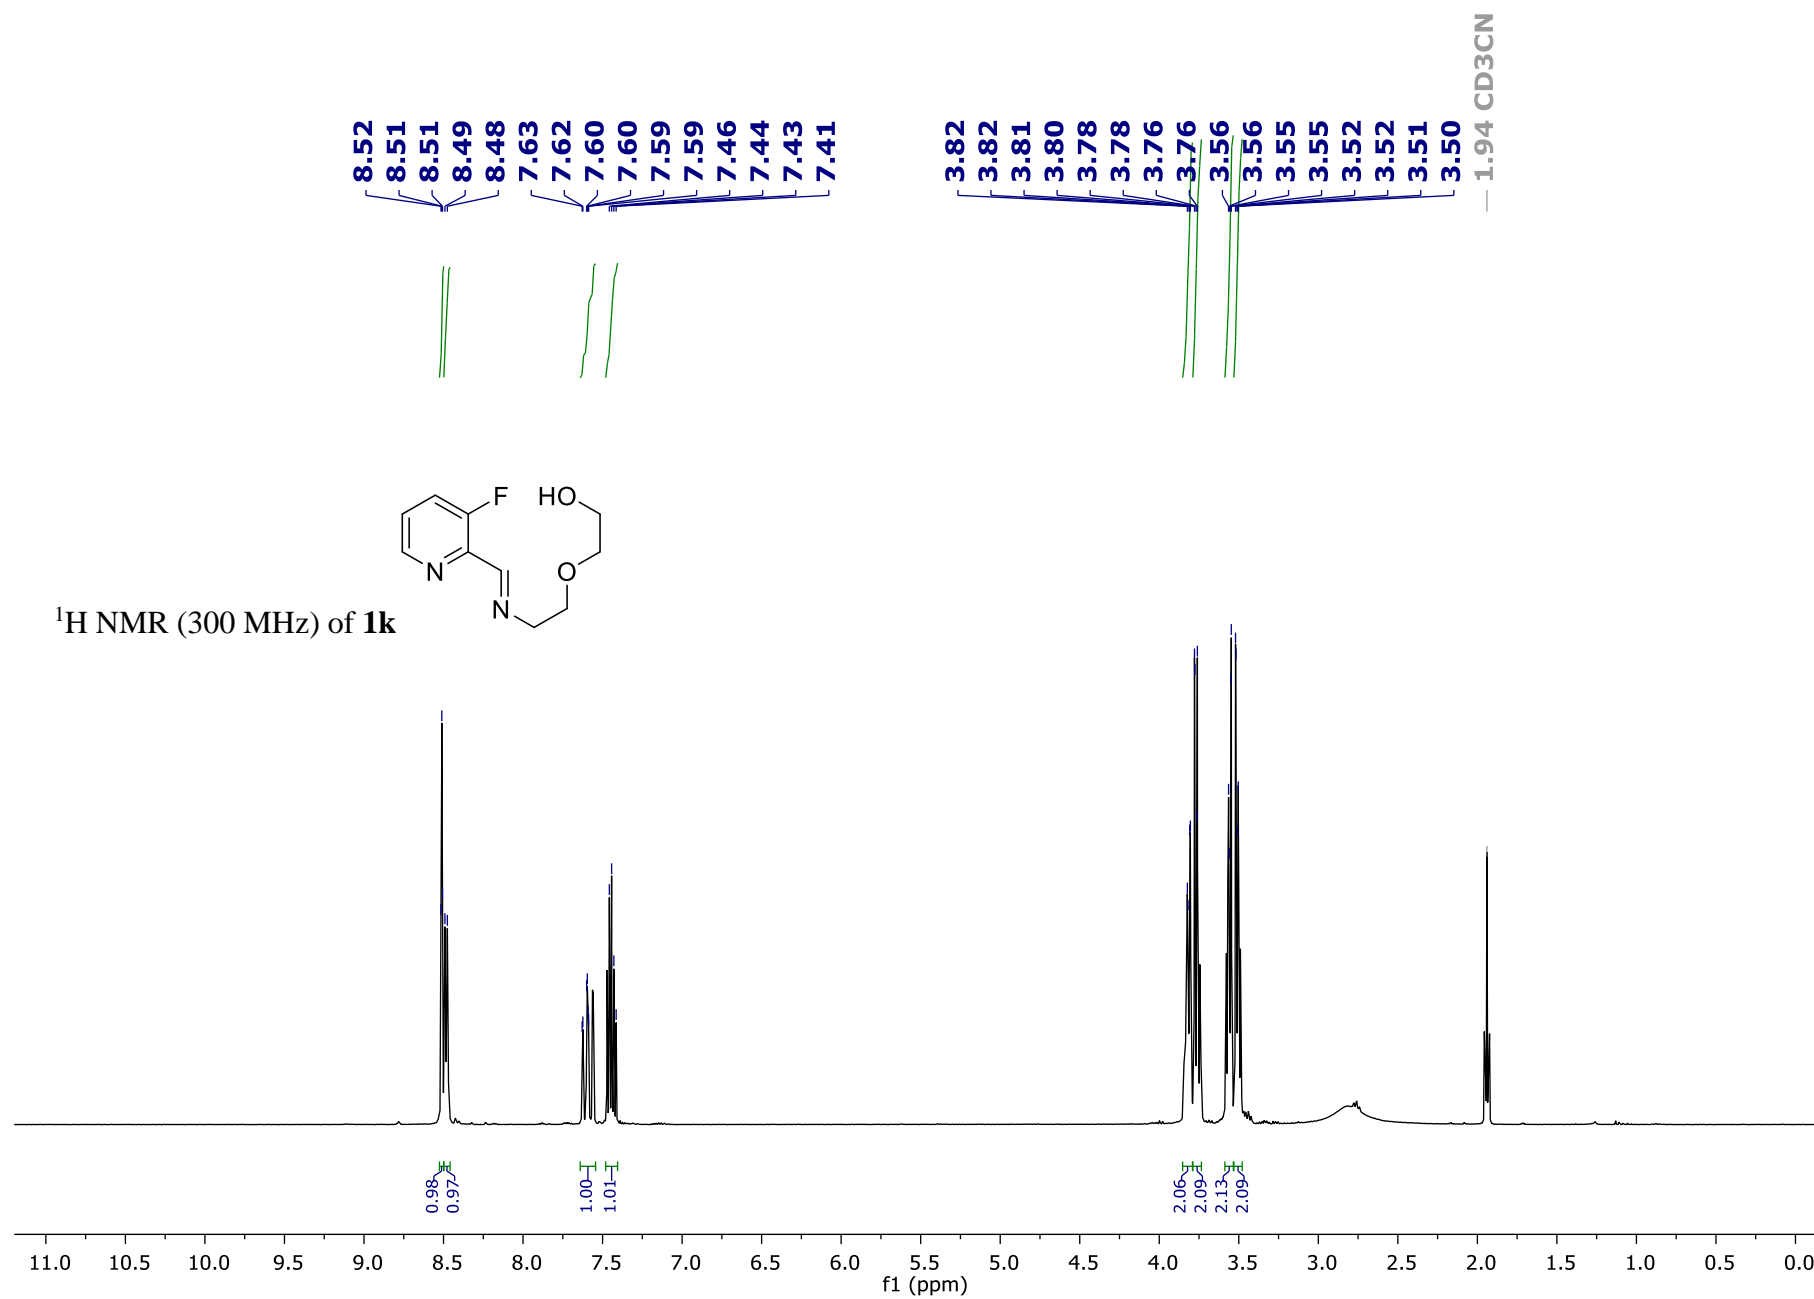

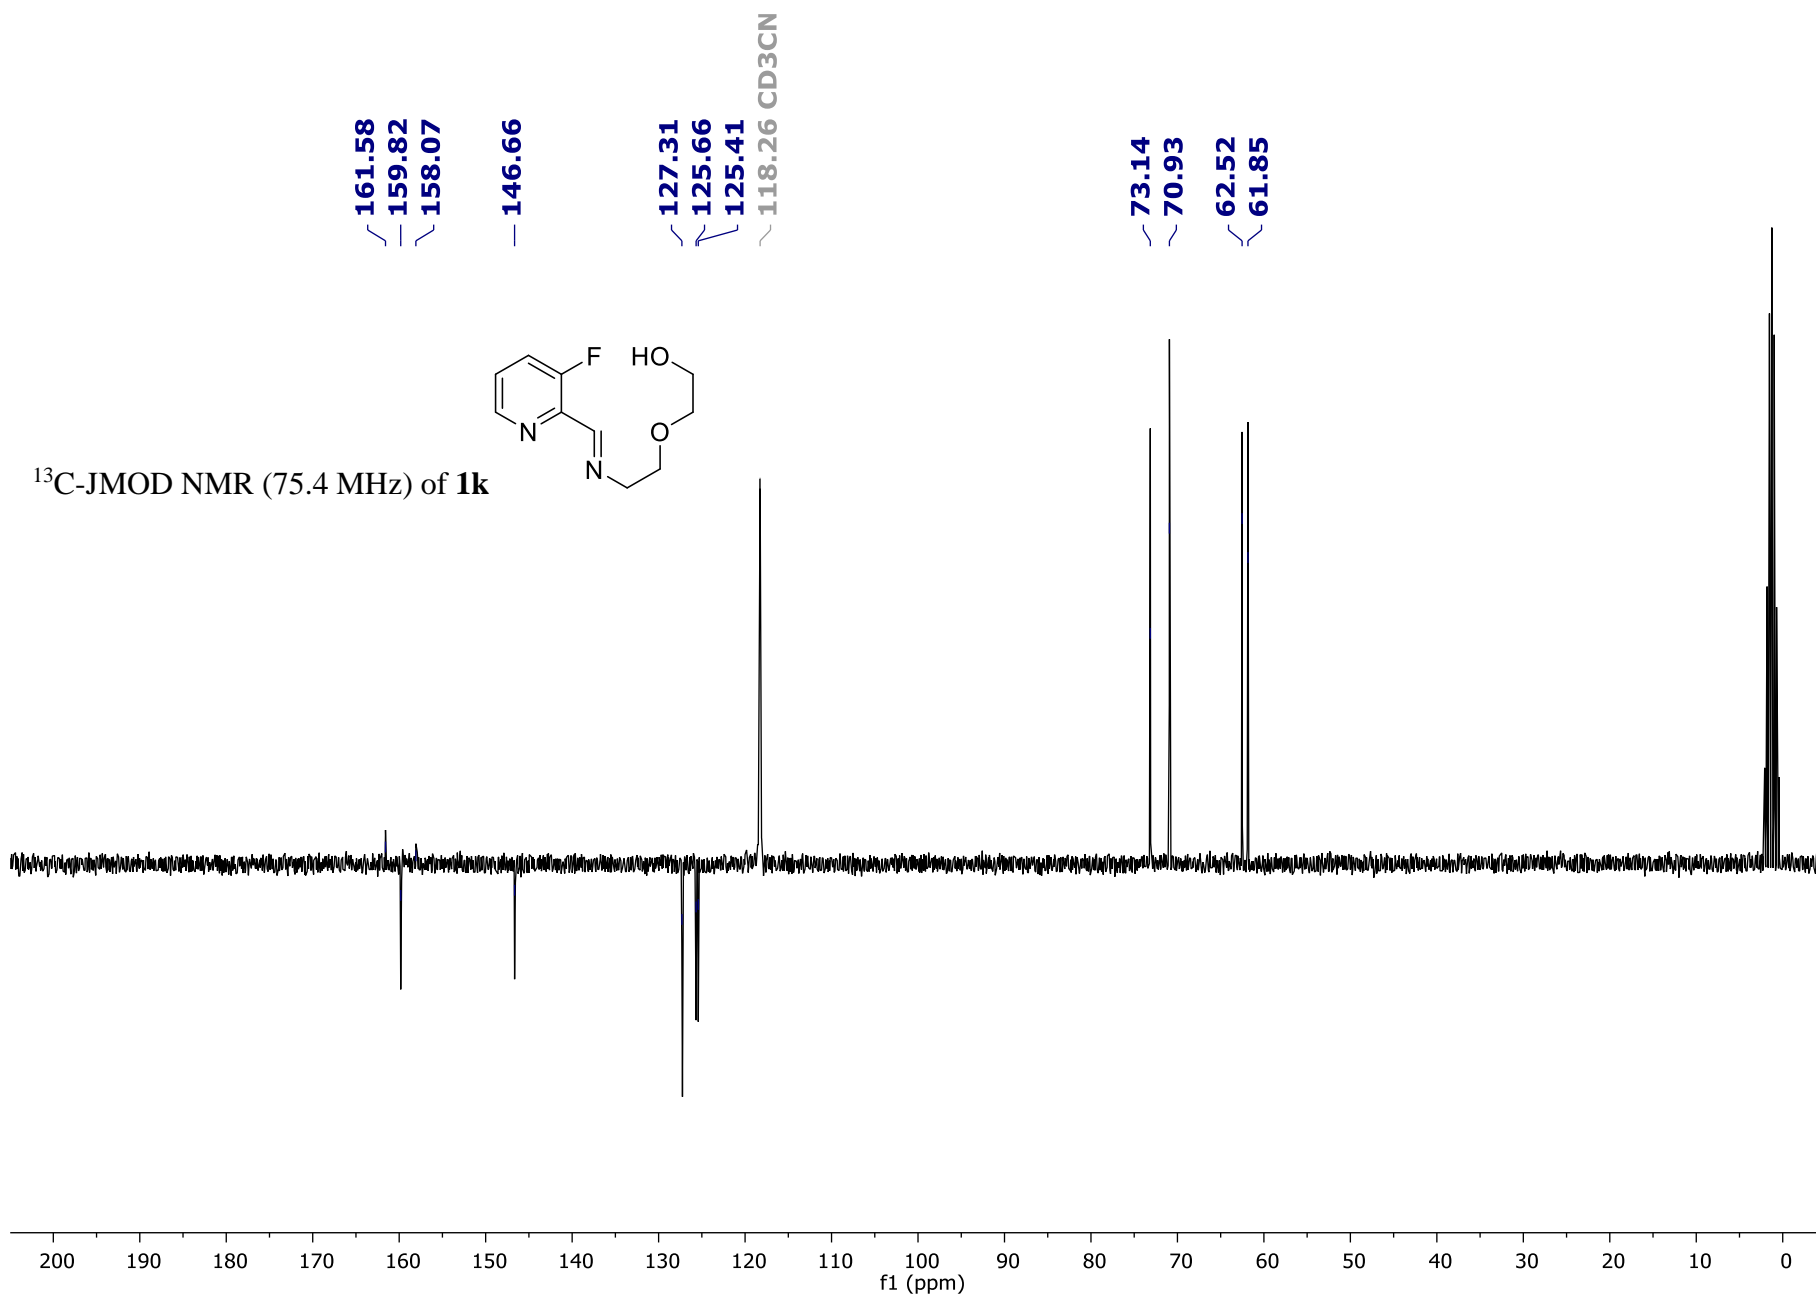

$^{19}\text{F}$  NMR (282.4 MHz) of **1k**

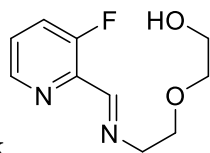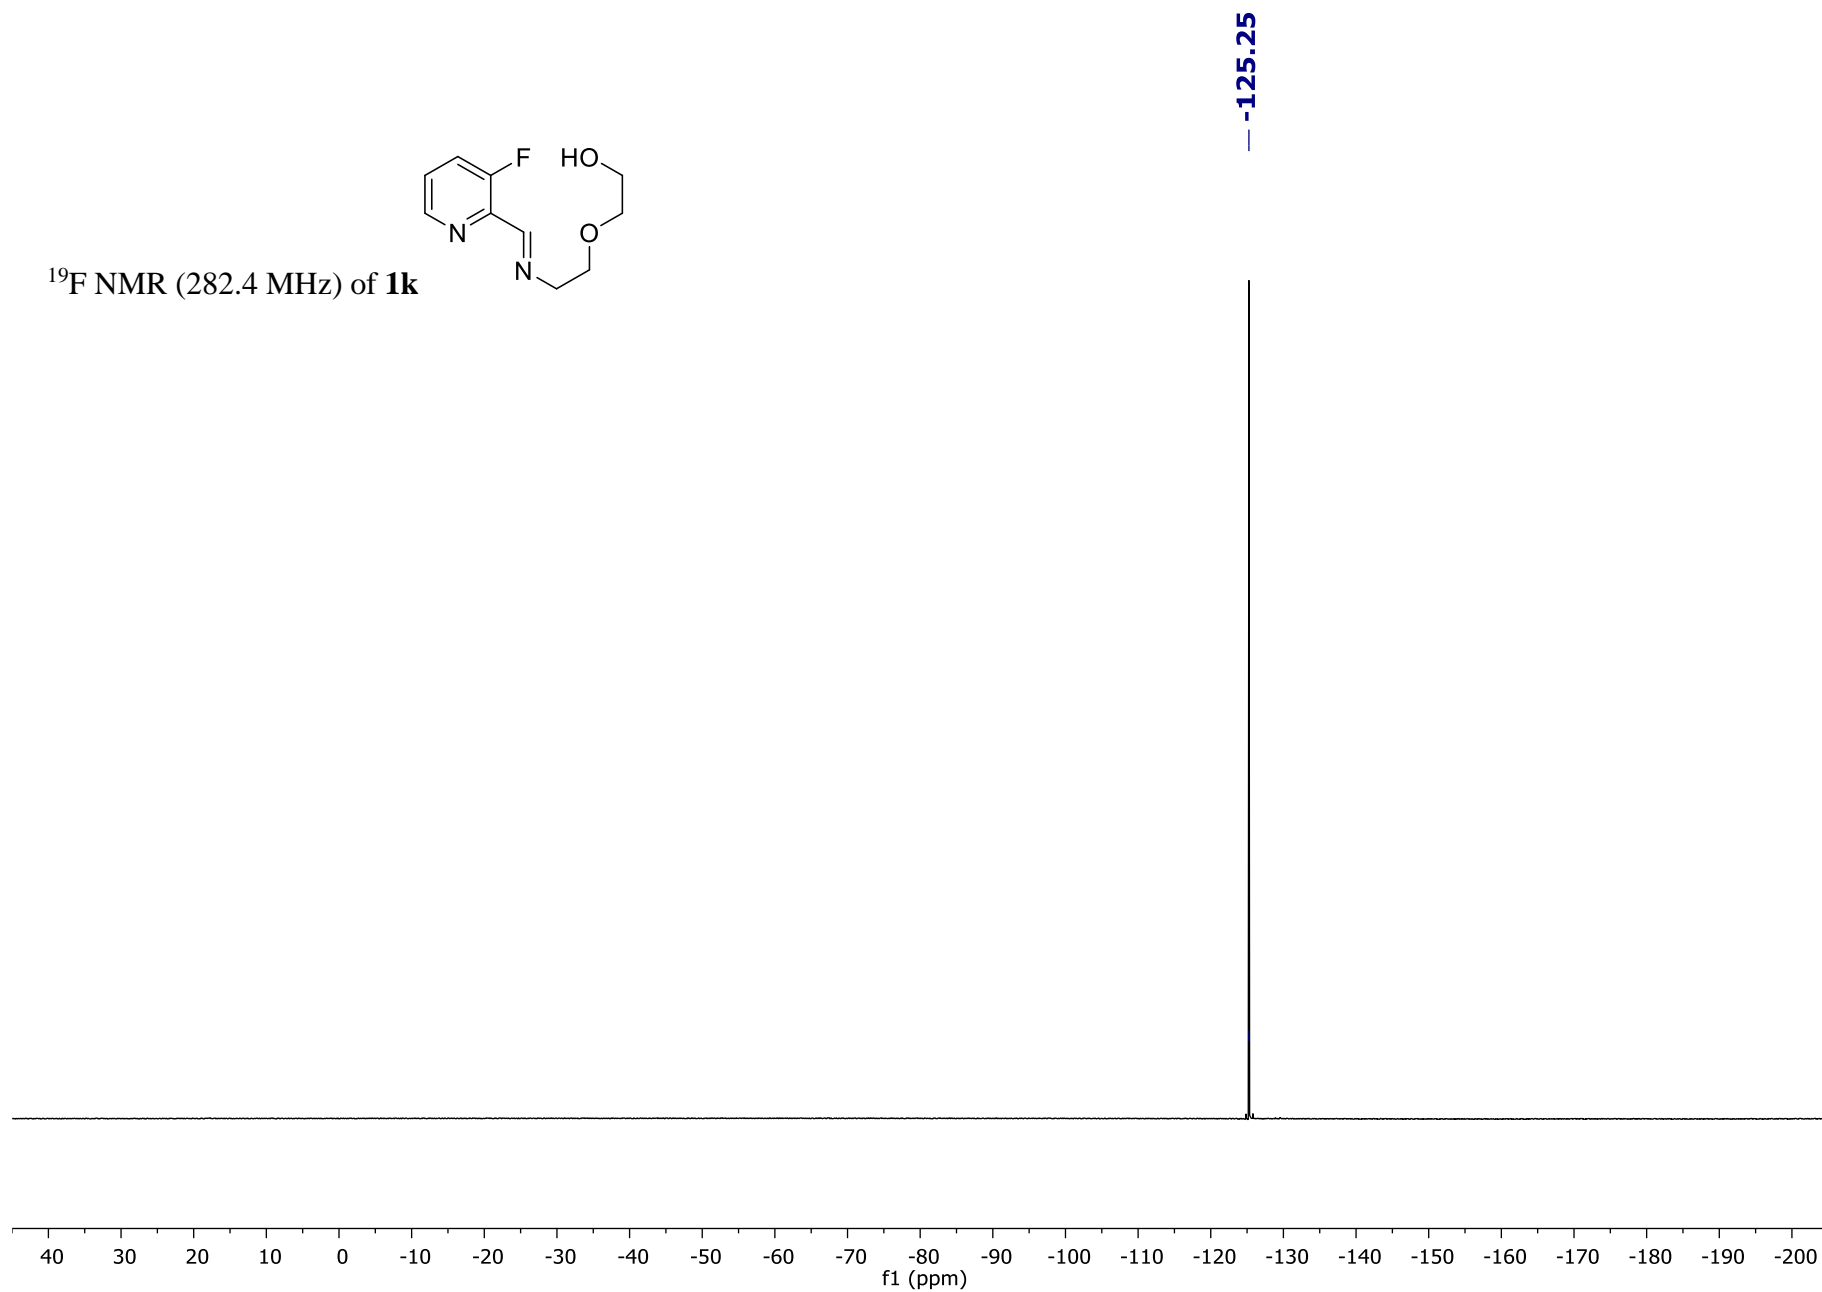



$^1\text{H}$  NMR (300 MHz) of **1a'**

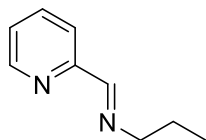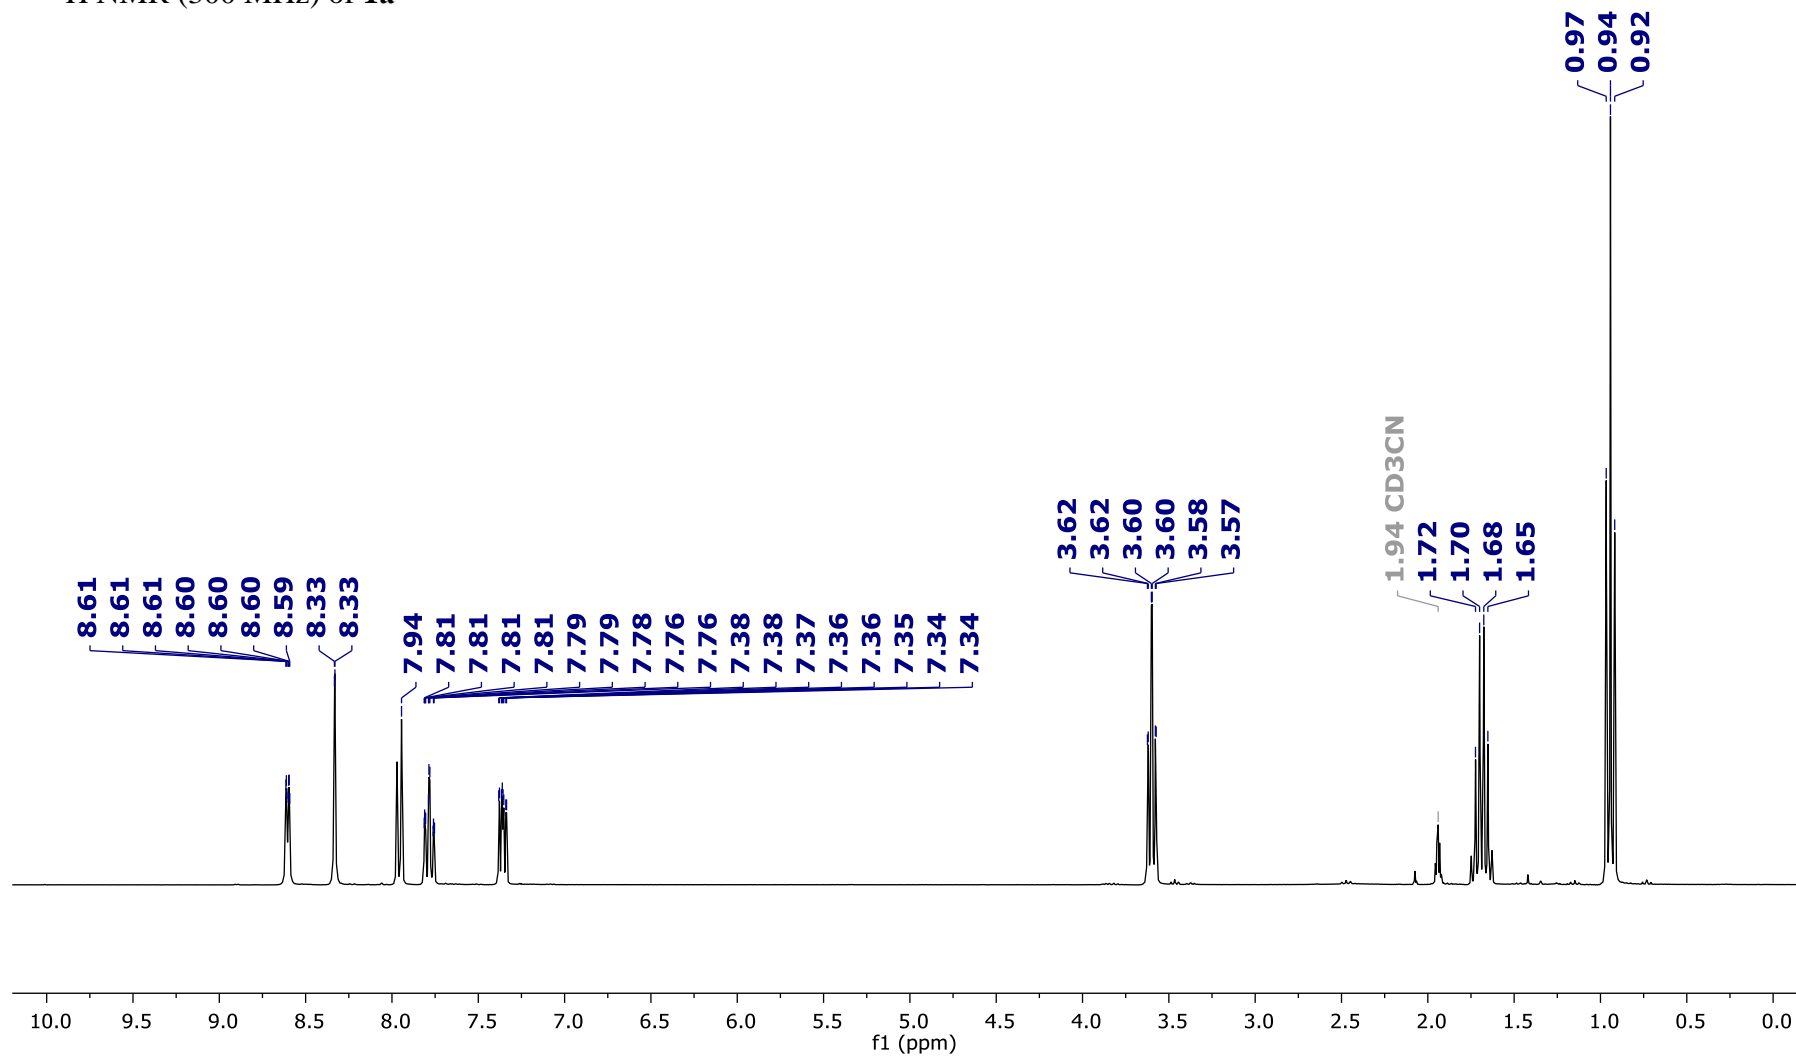

$^{13}\text{C}$  NMR (75.4 MHz) of **1a'**

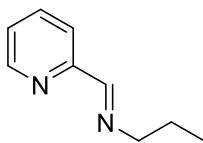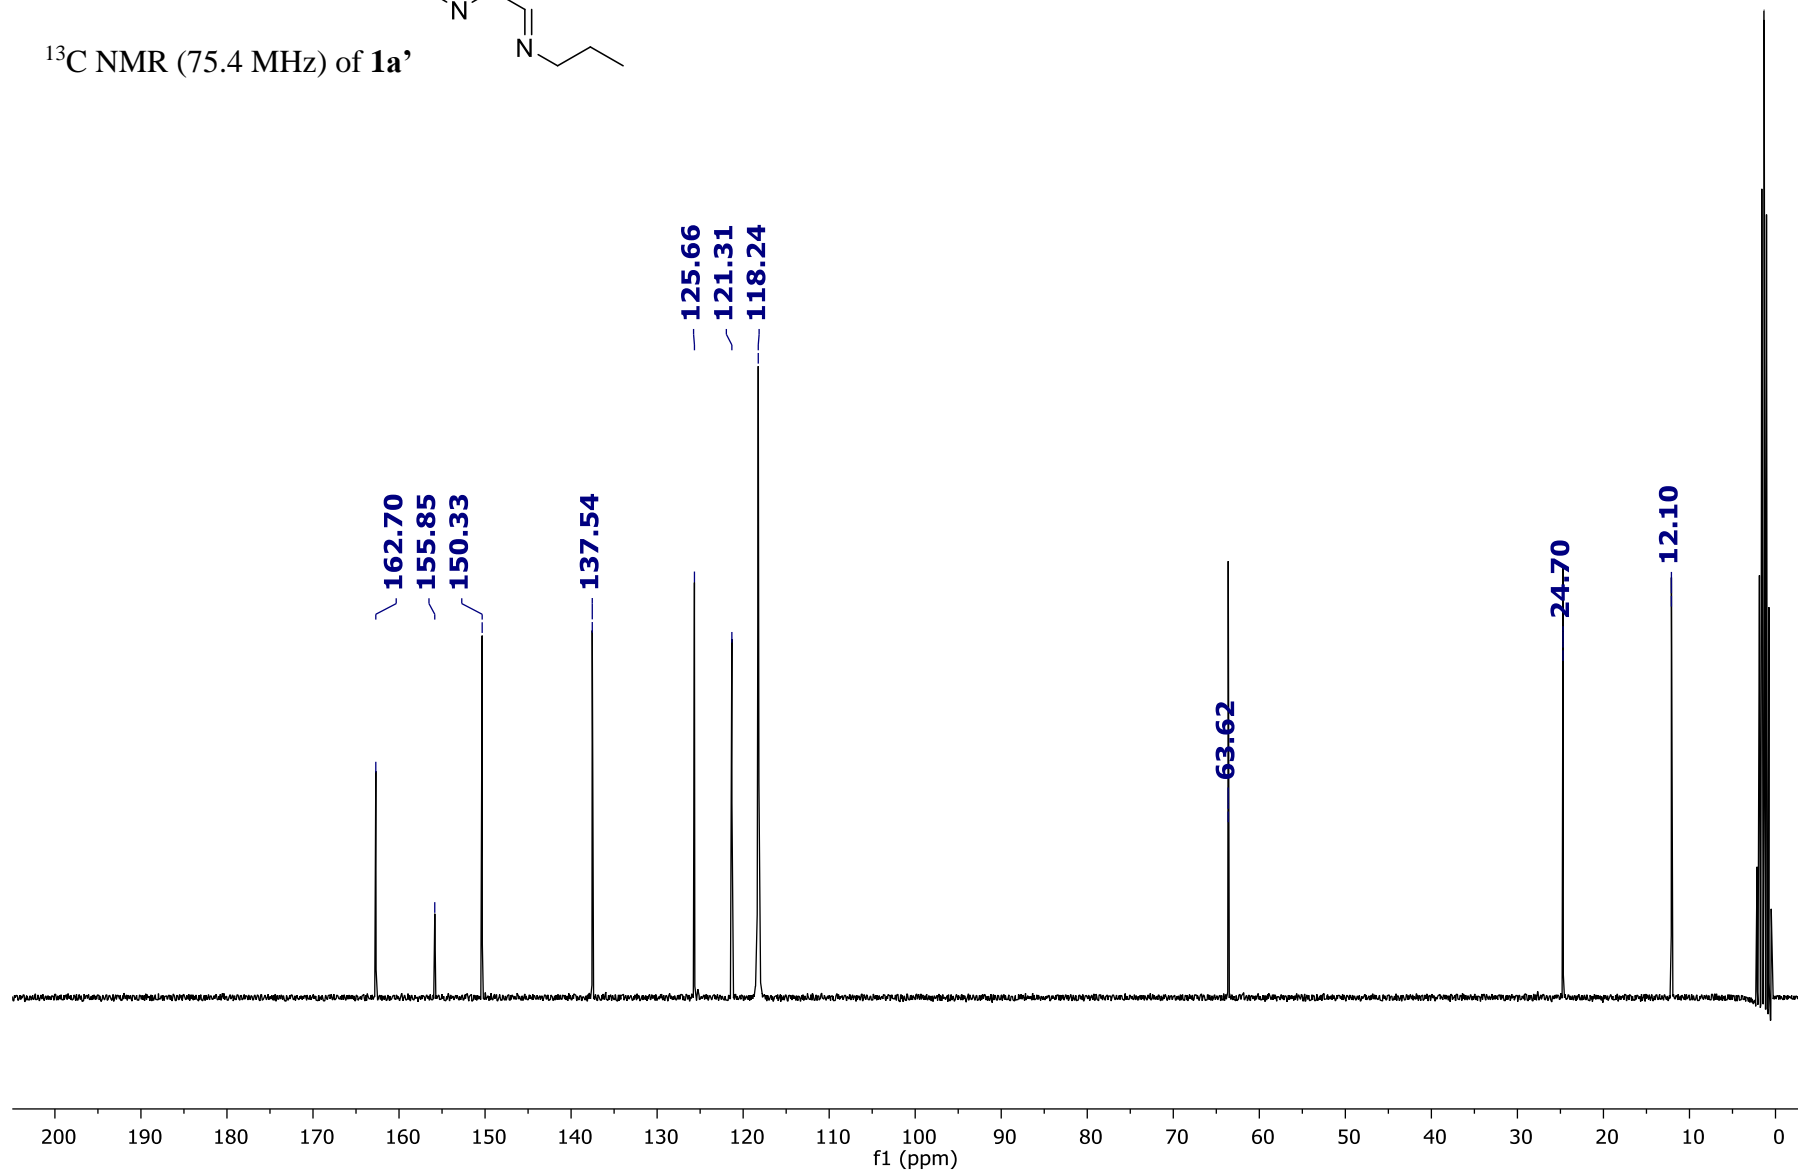

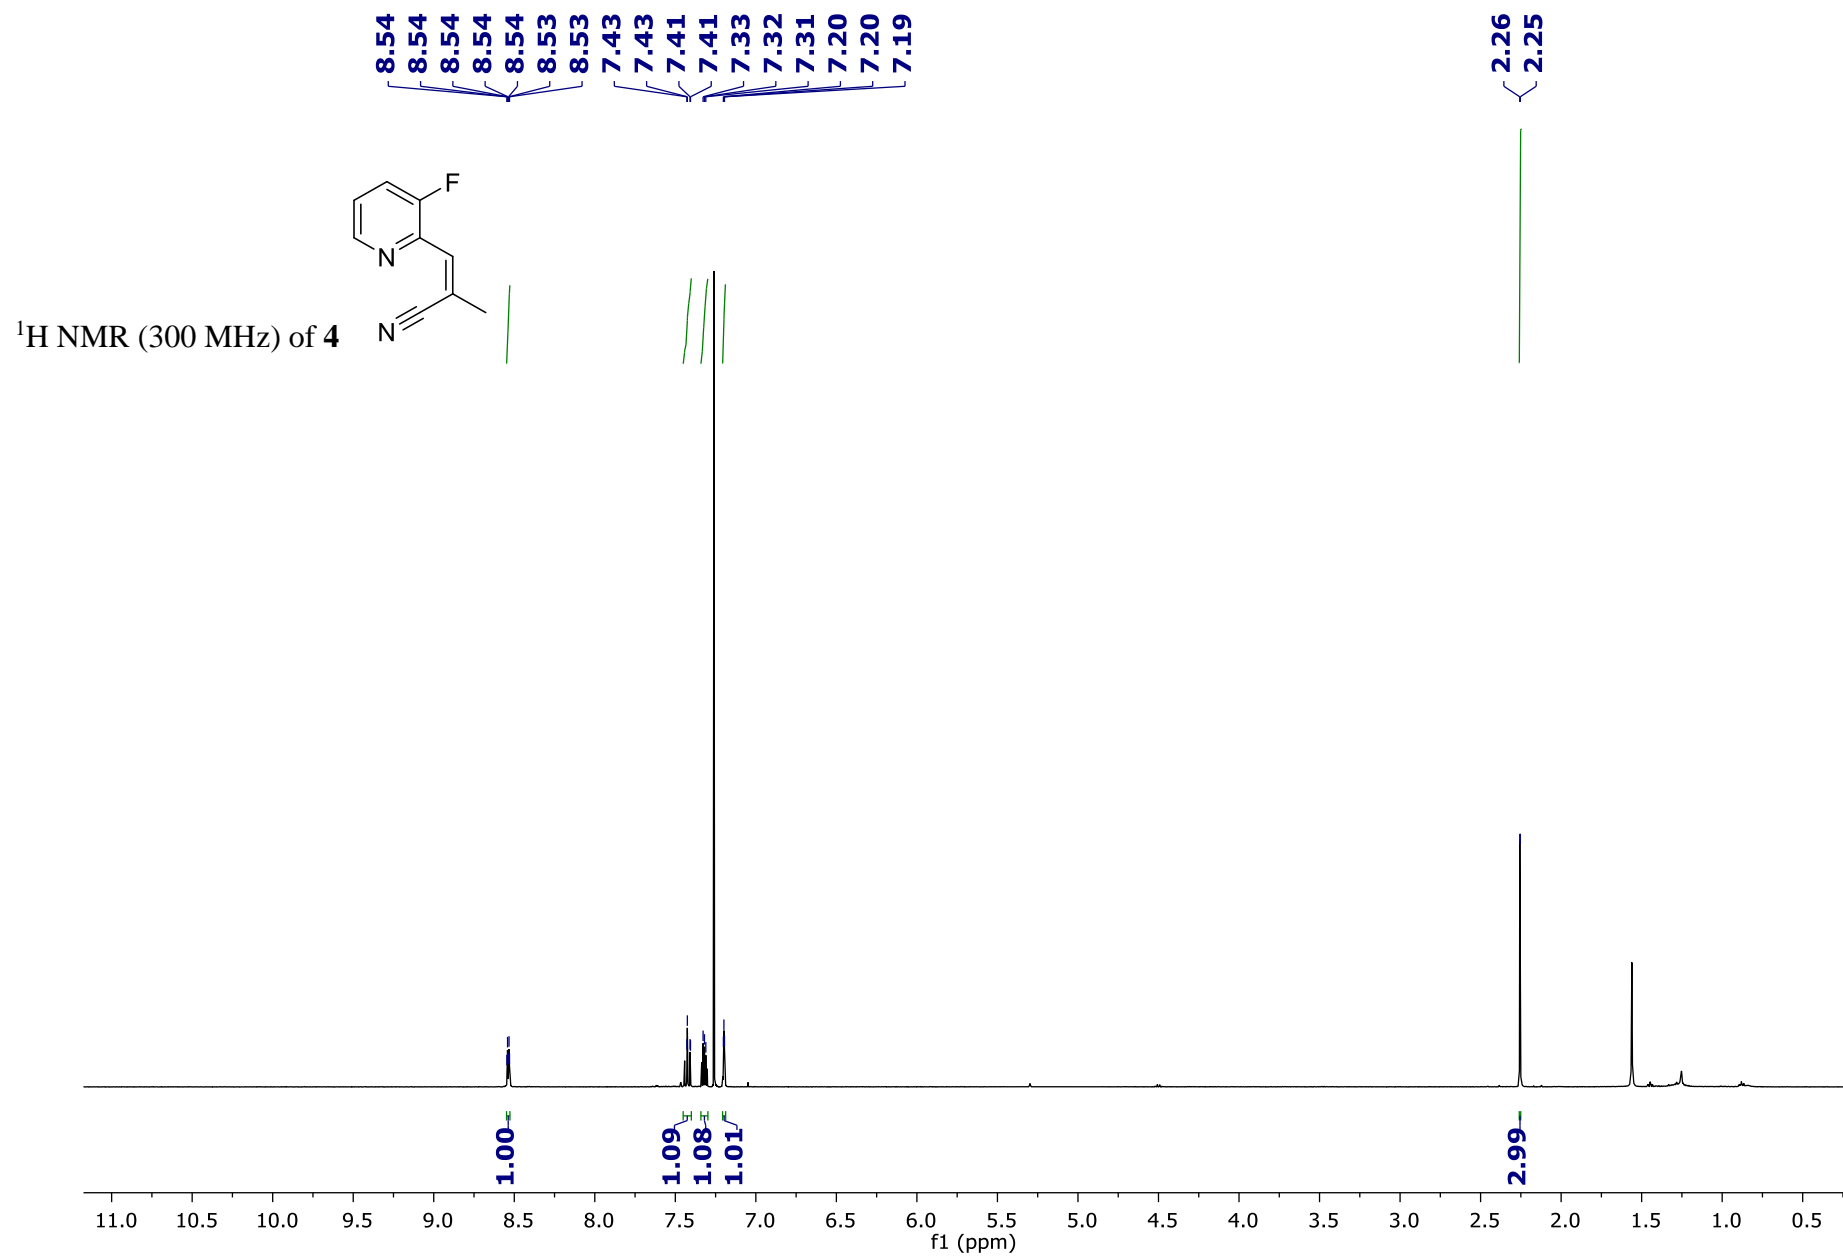

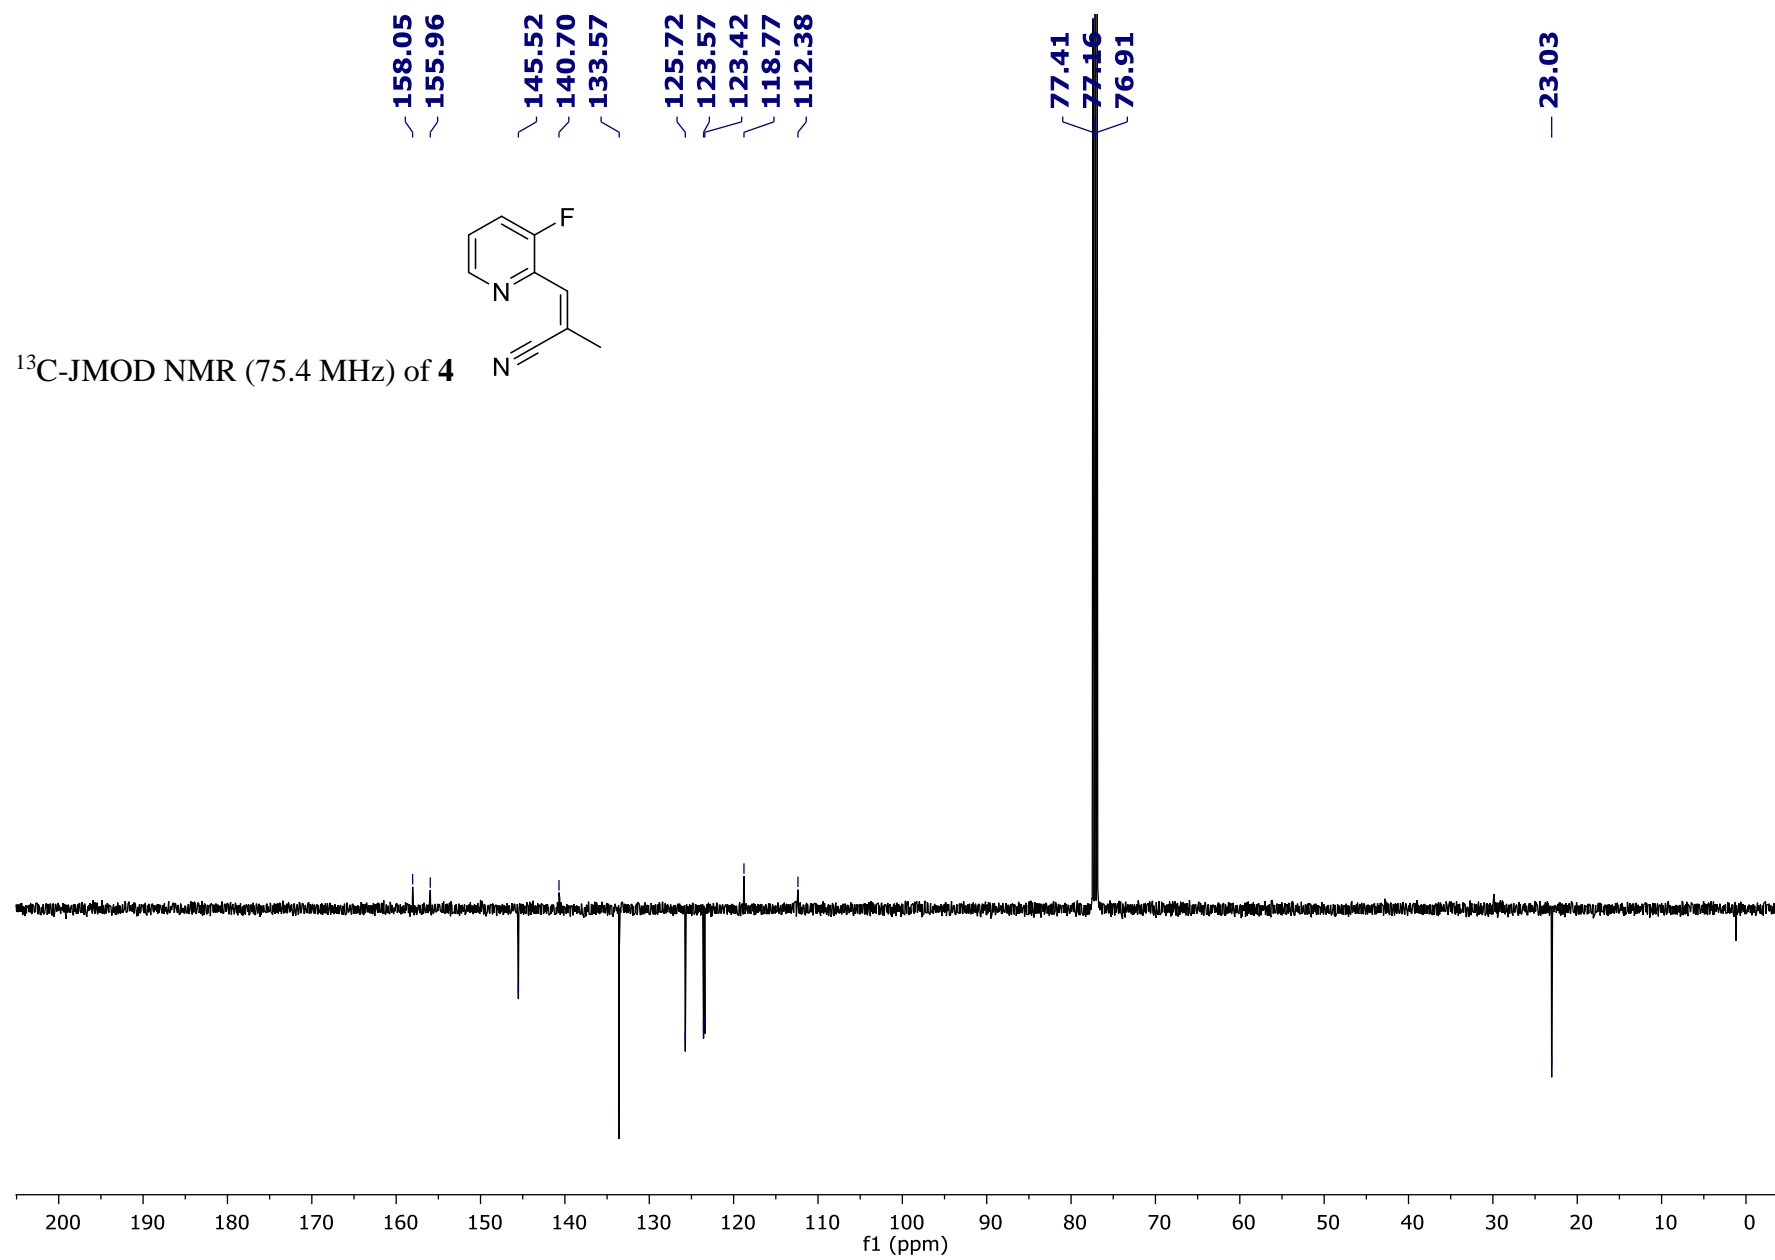

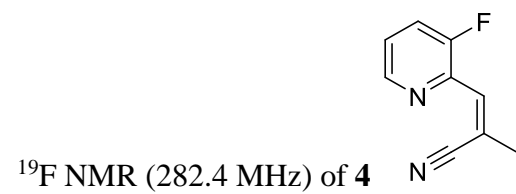

— -124.29

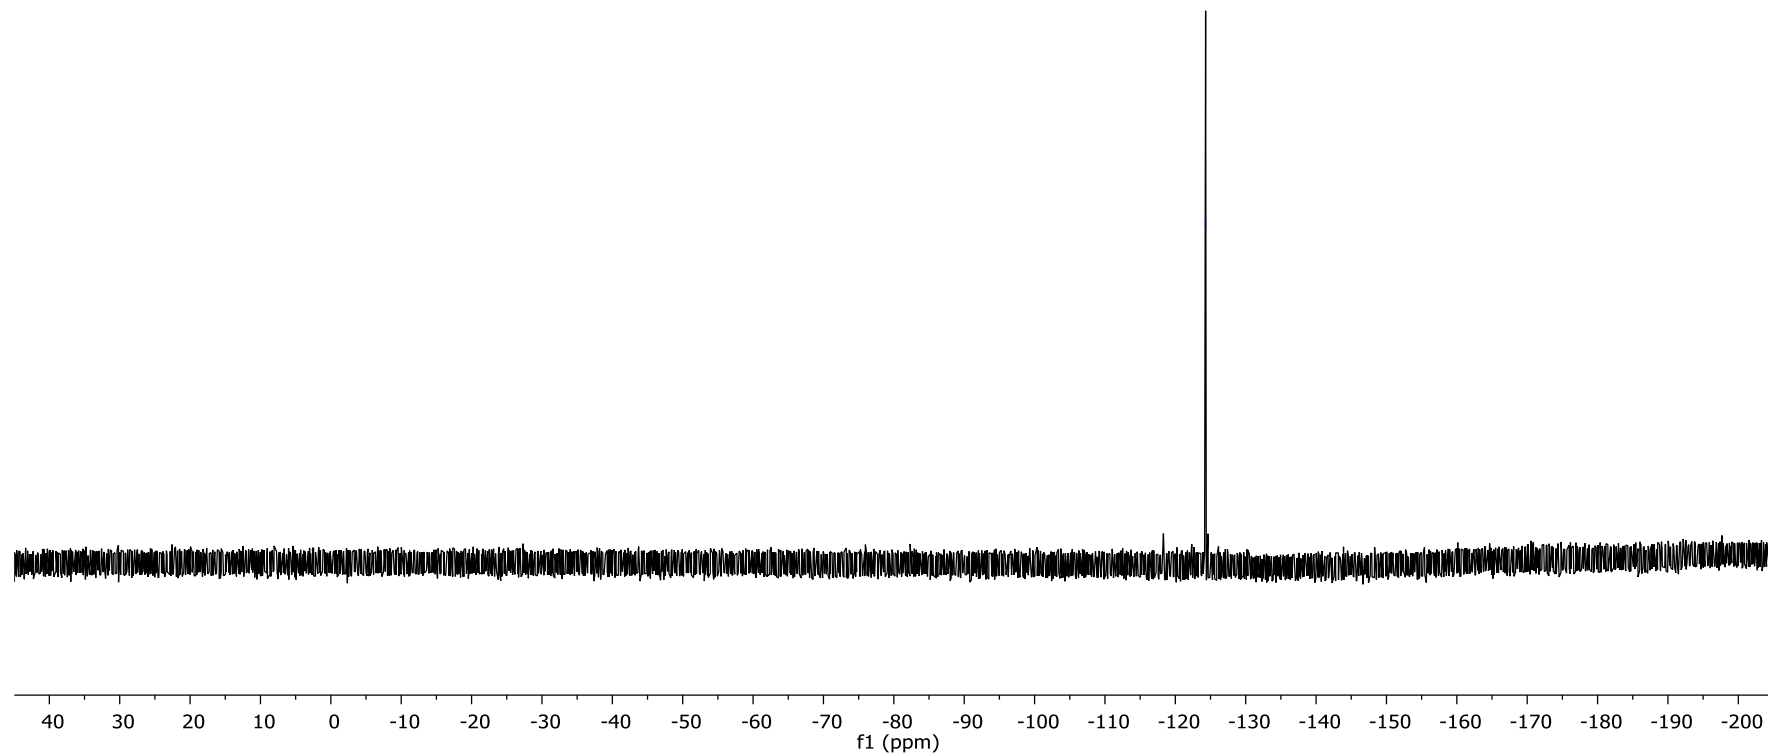

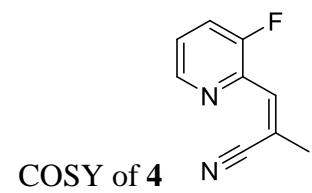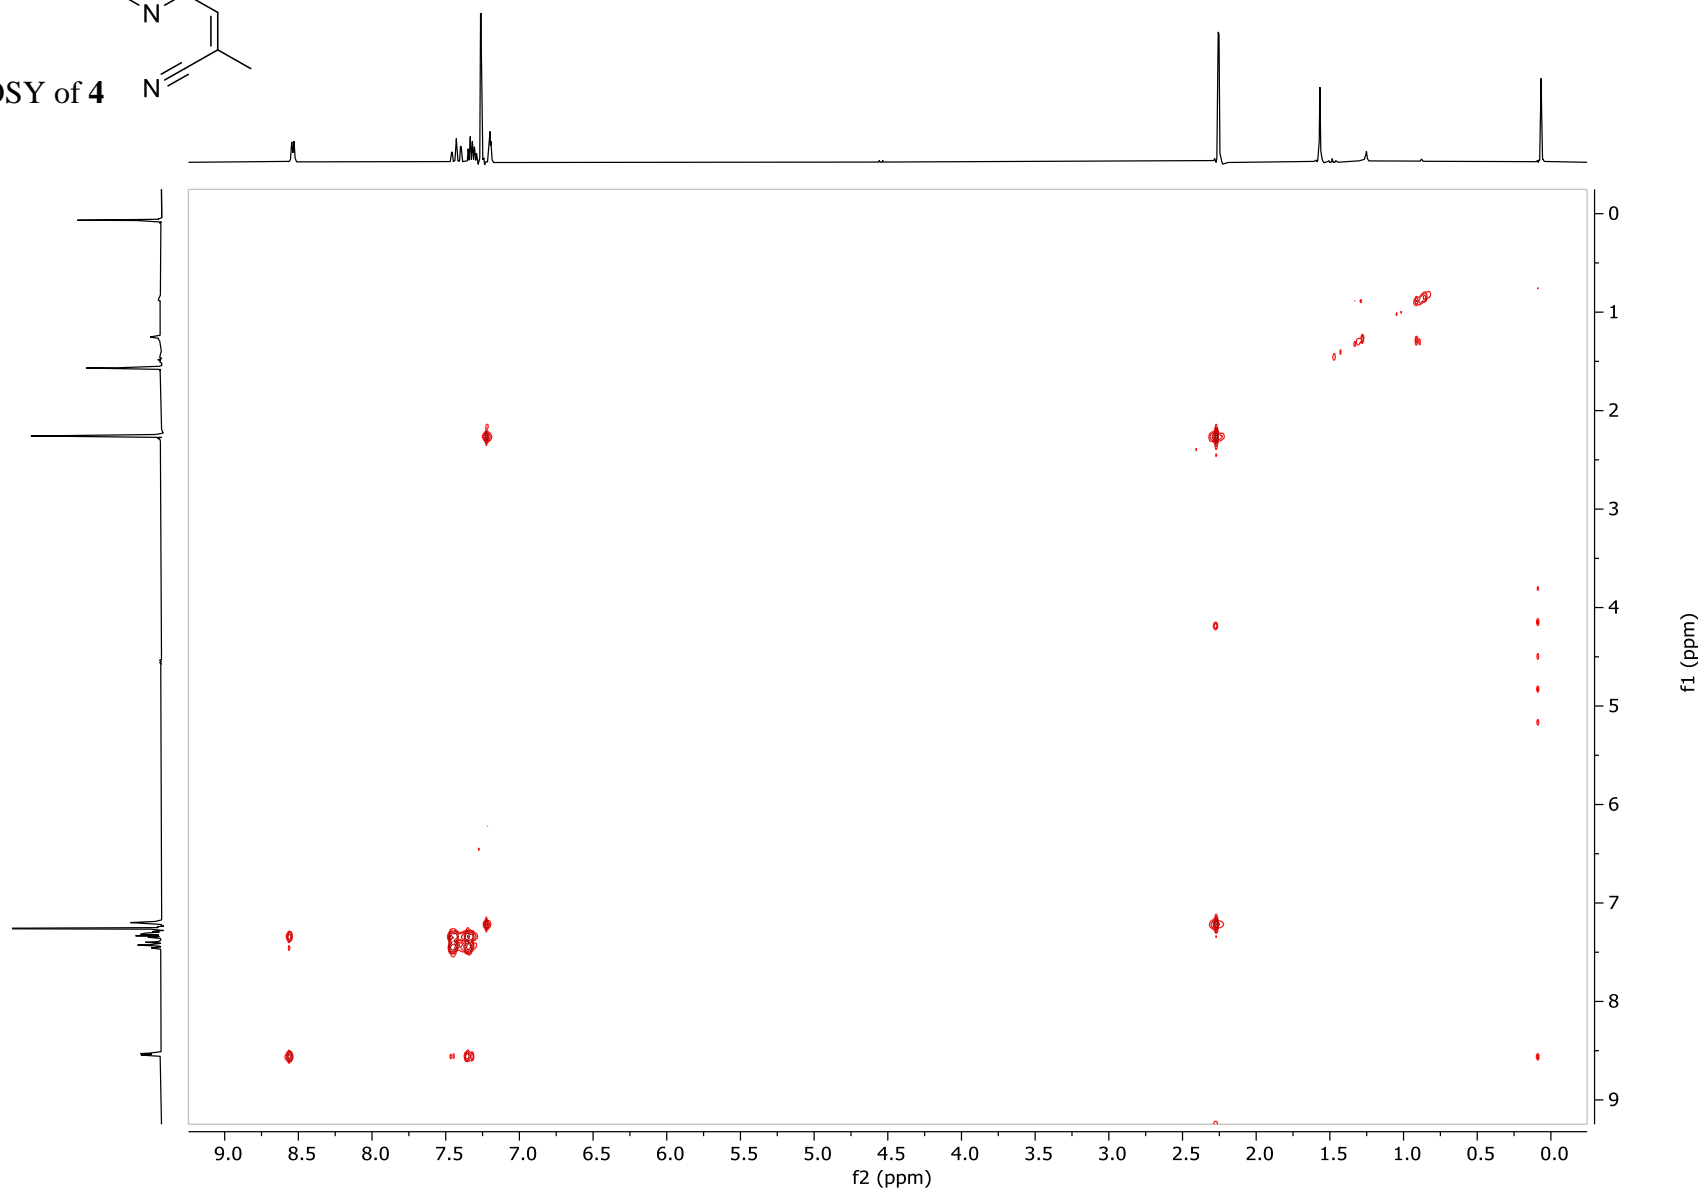

HSQC of **4**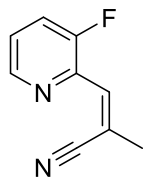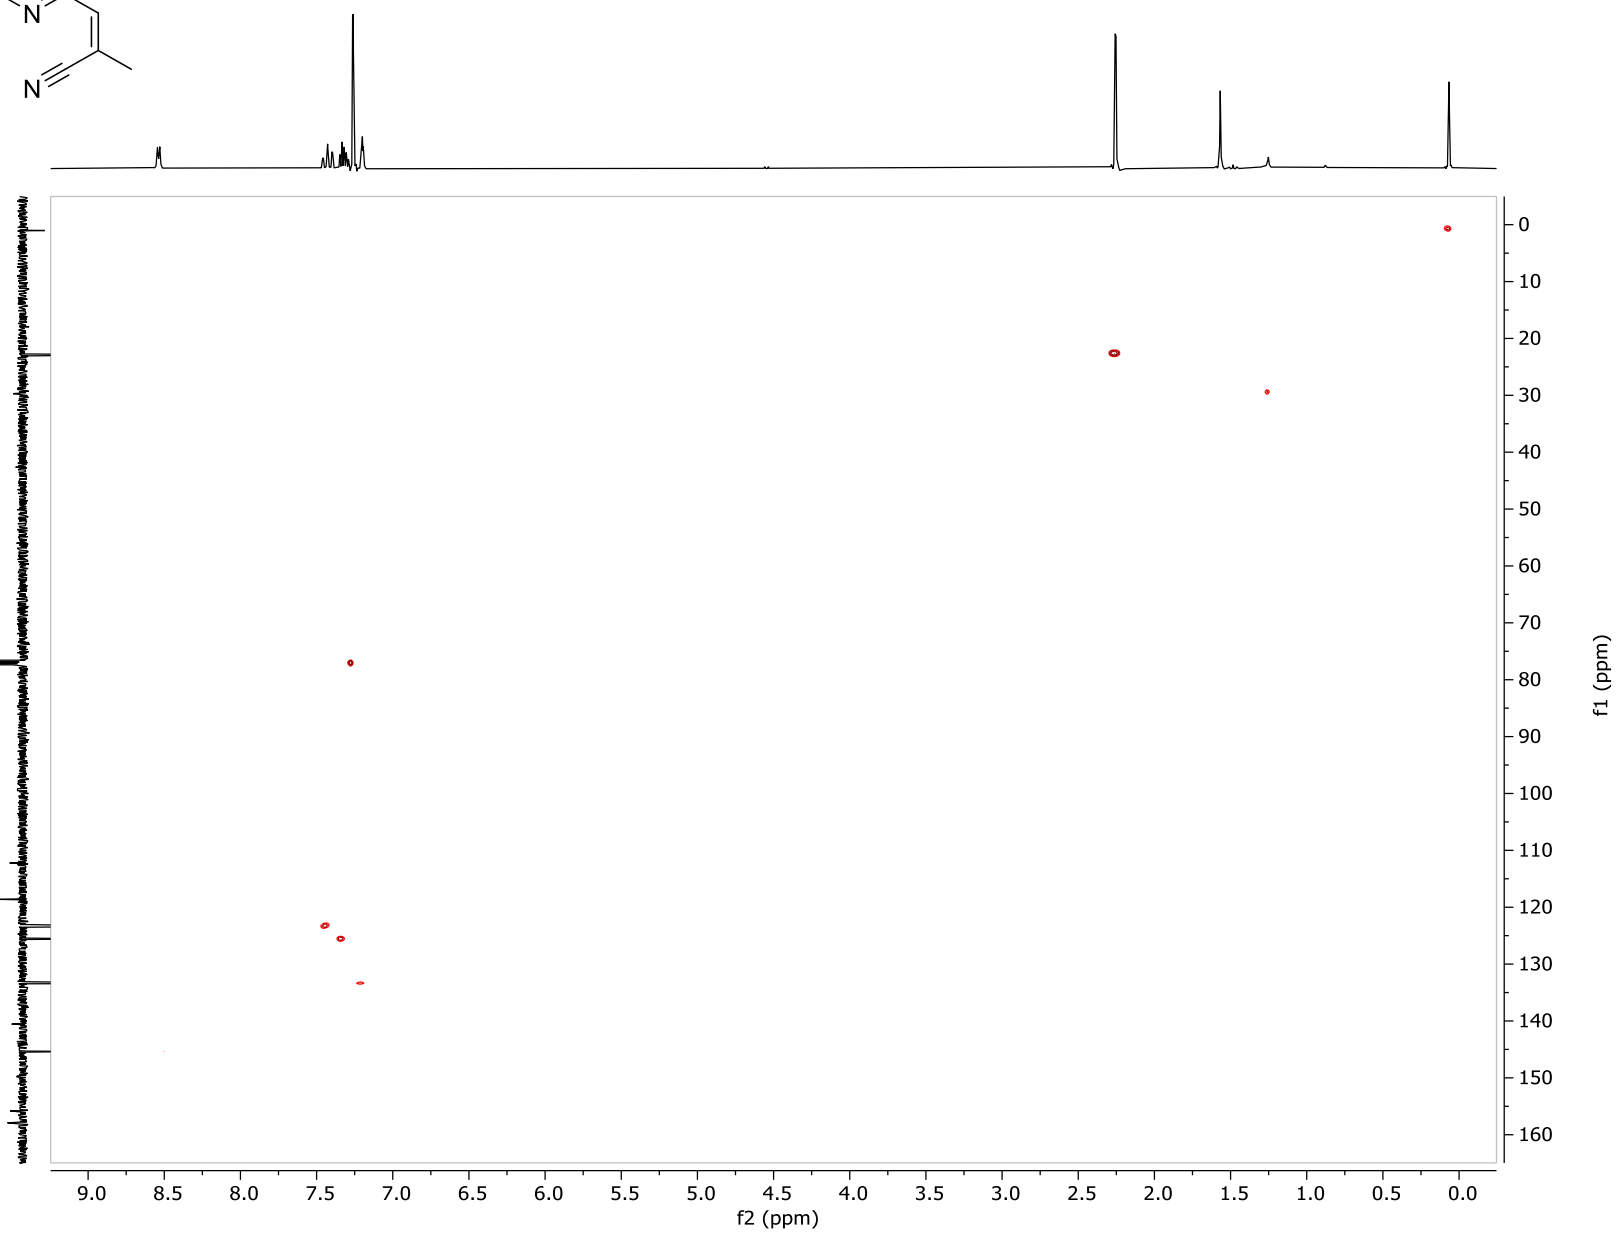

HMBC of 4

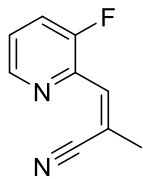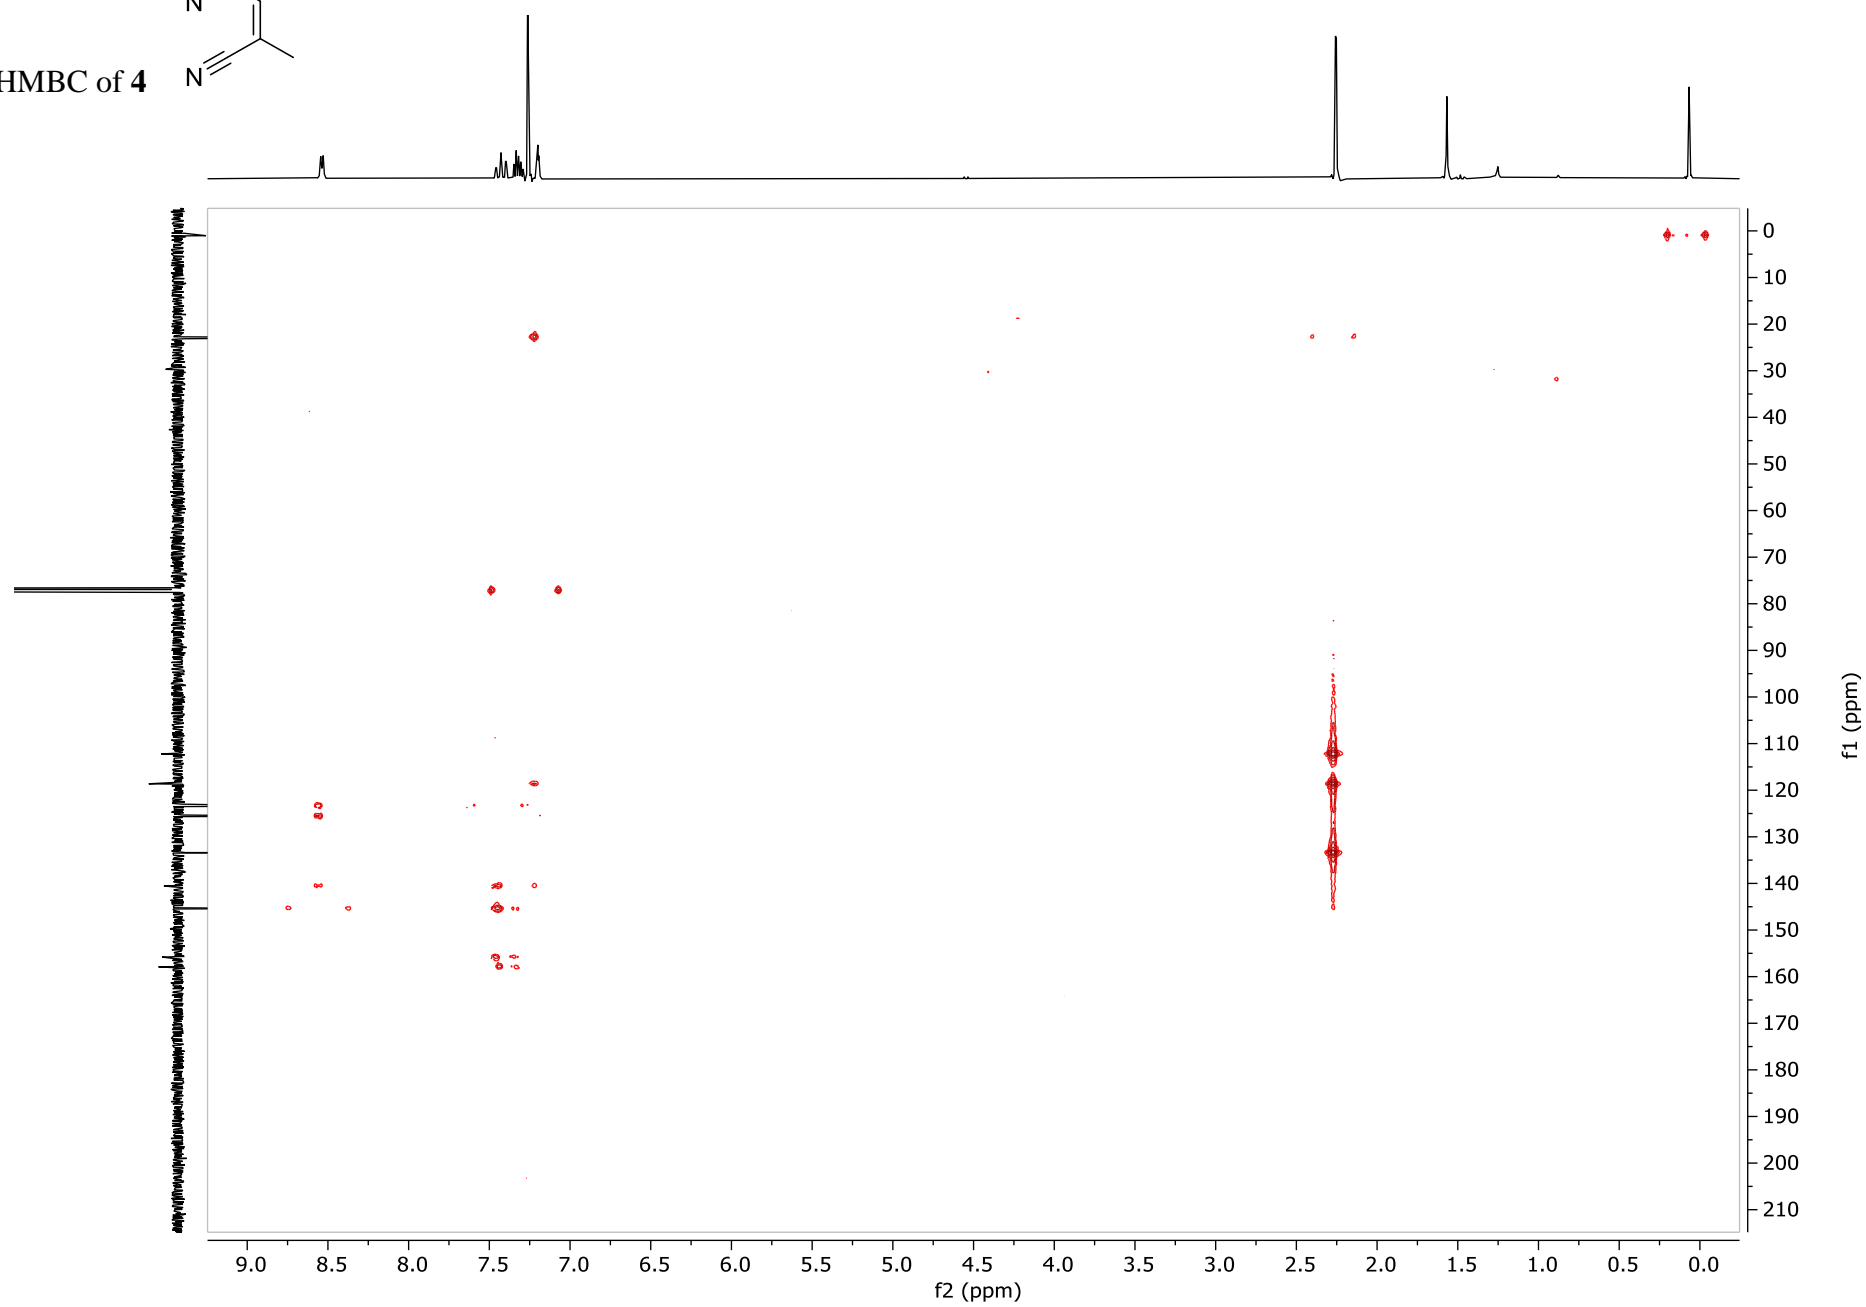



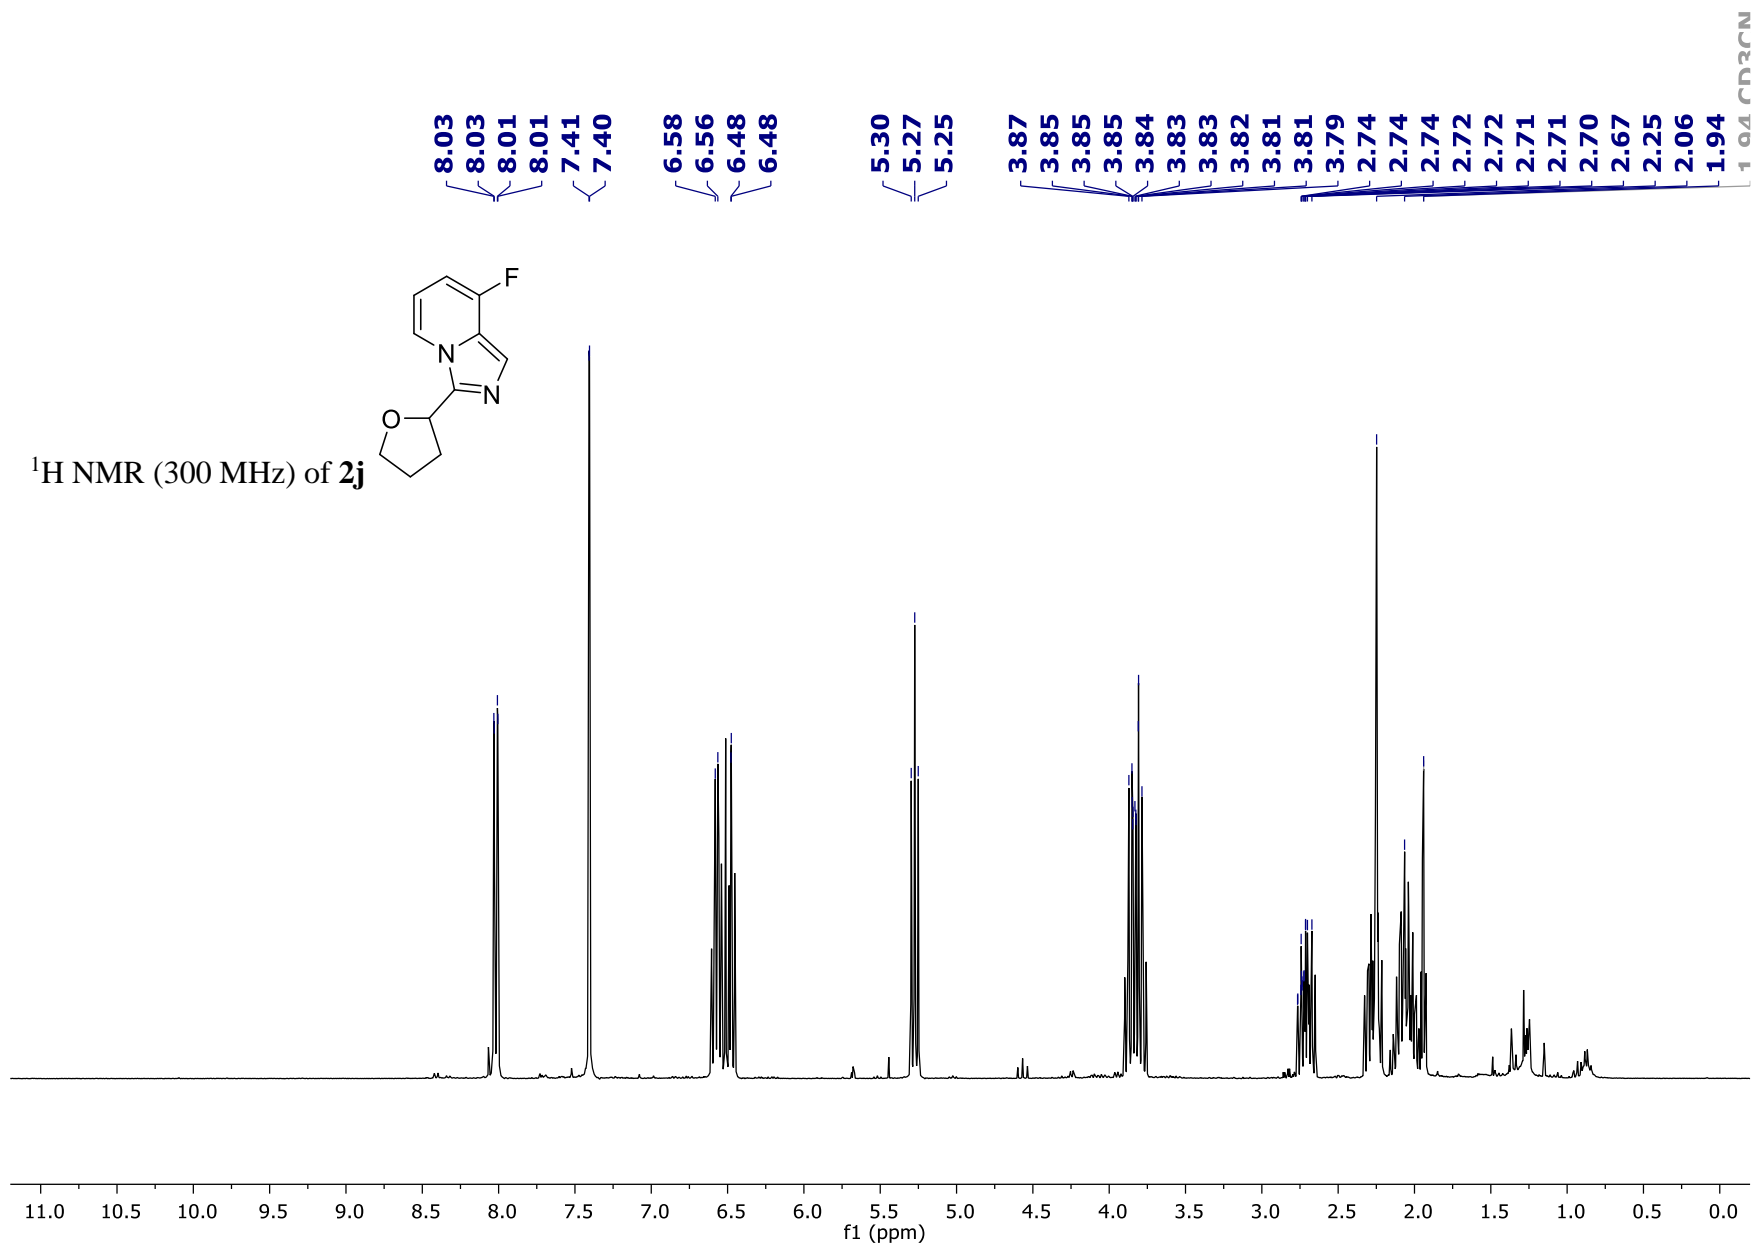

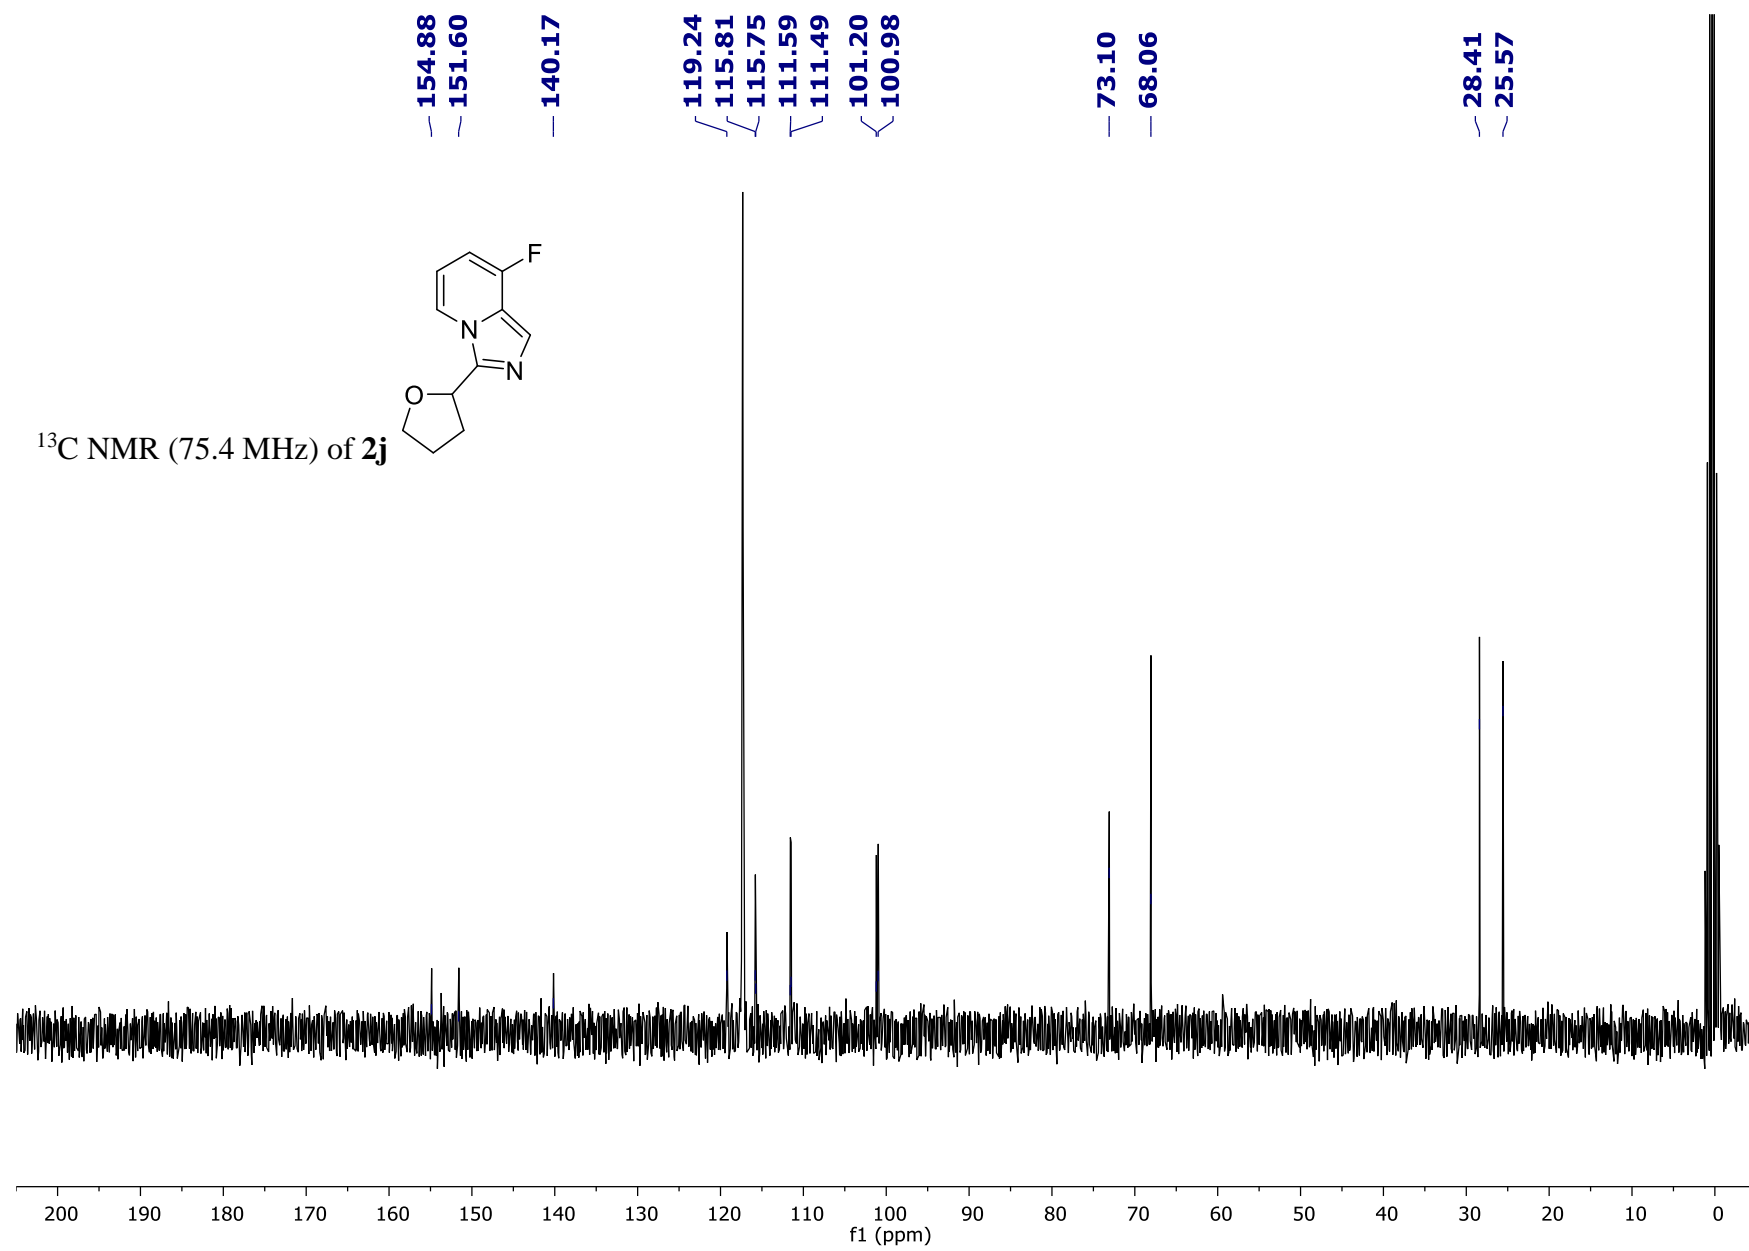

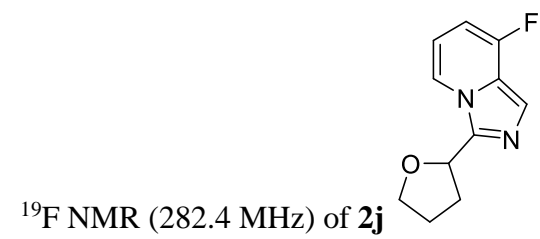

-126.68

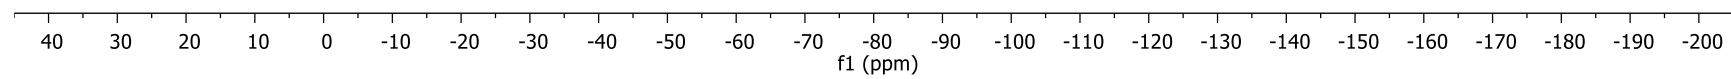

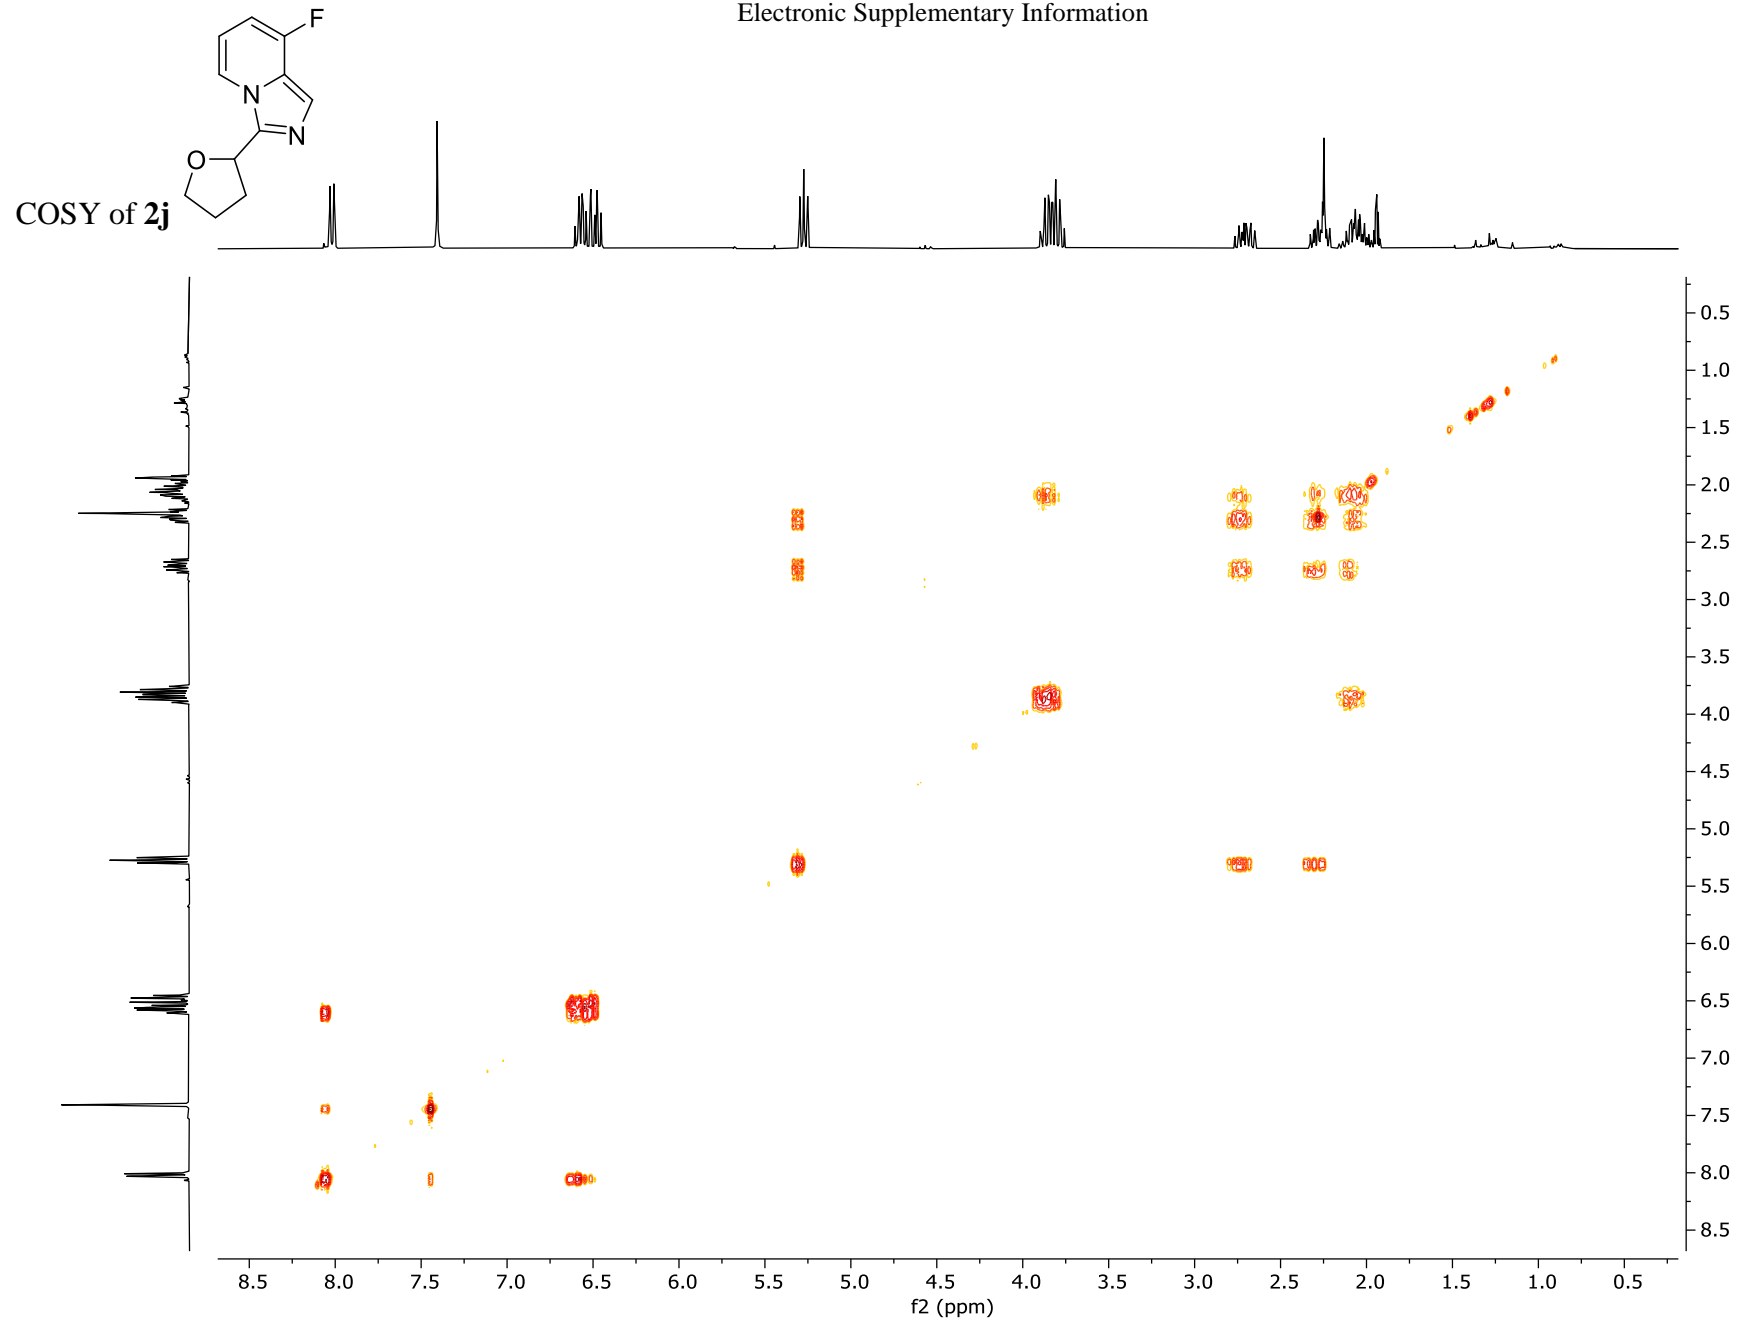

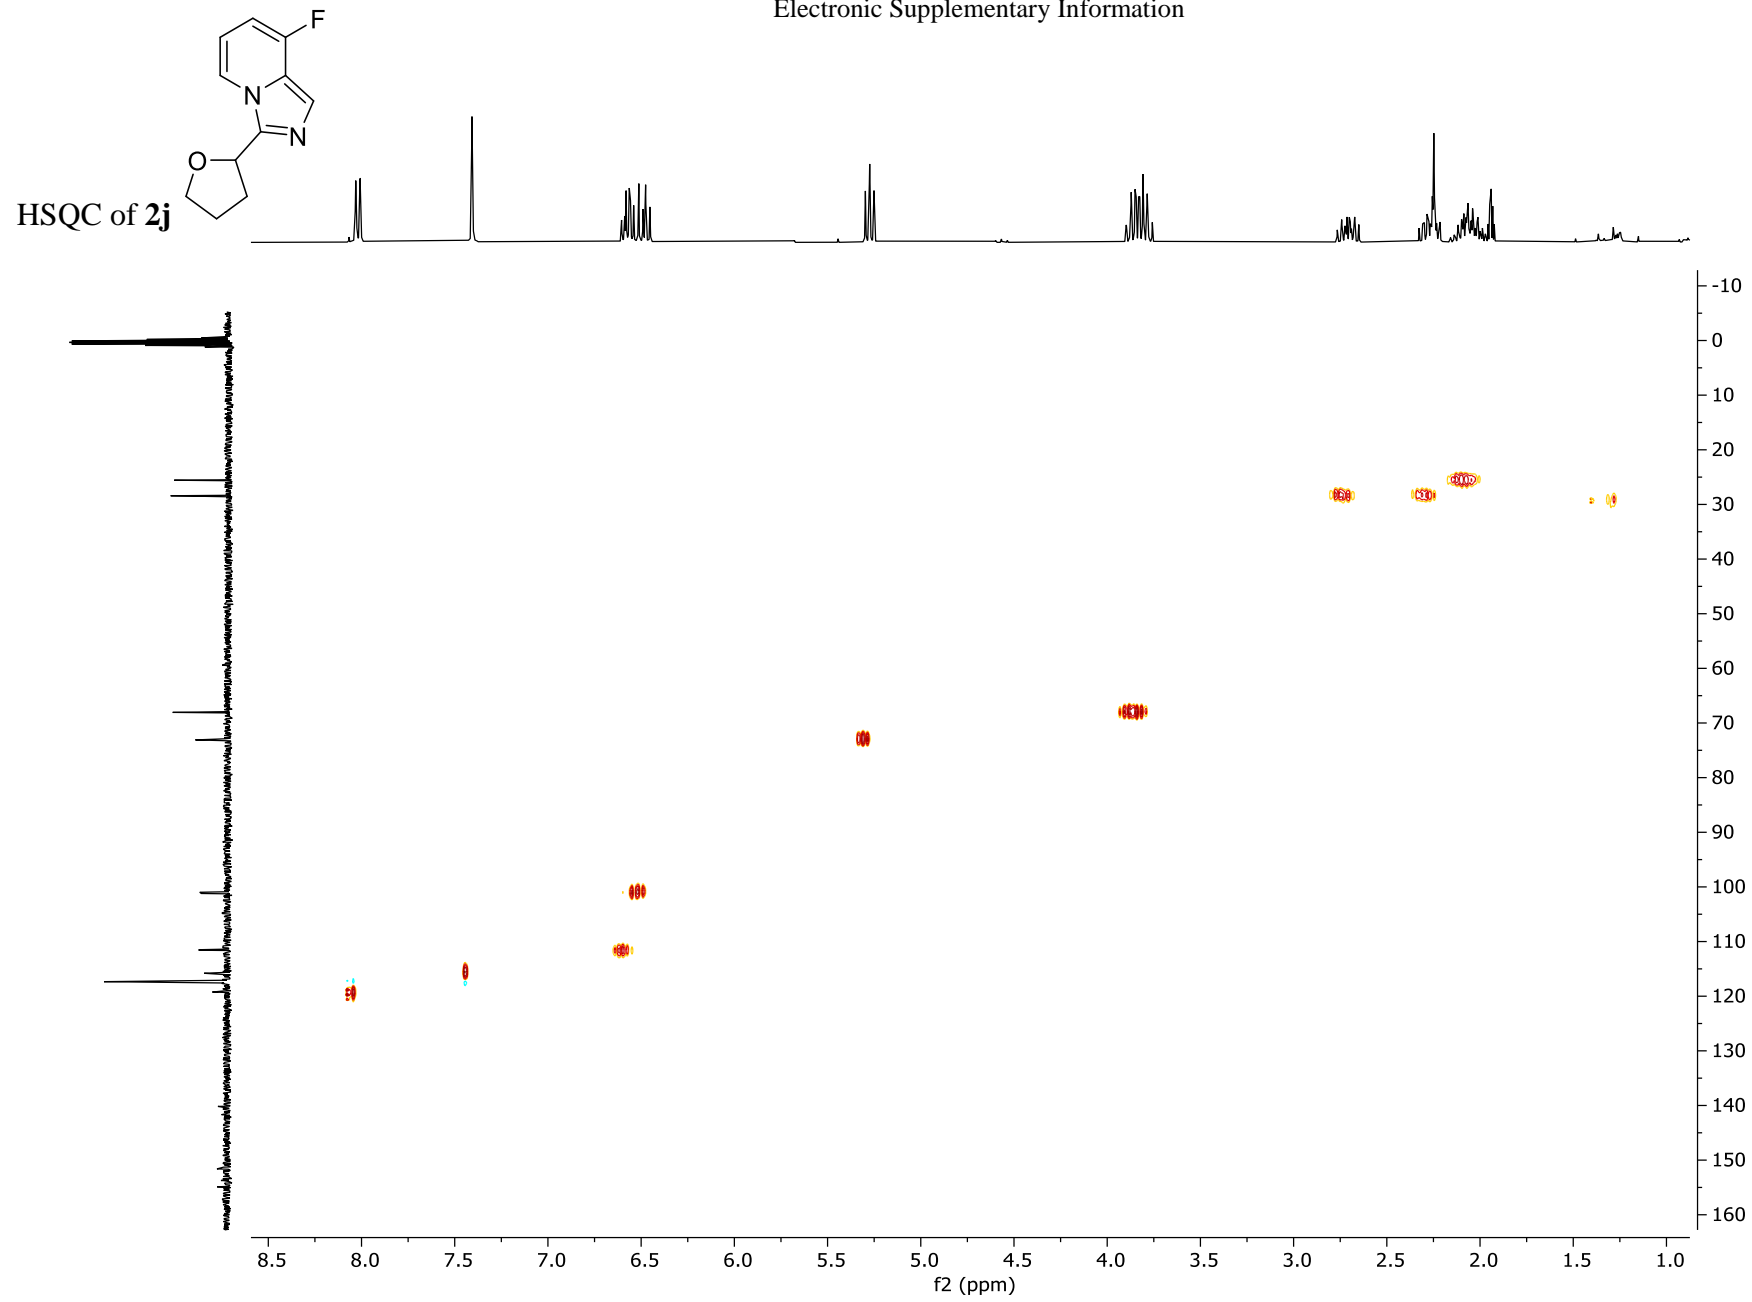

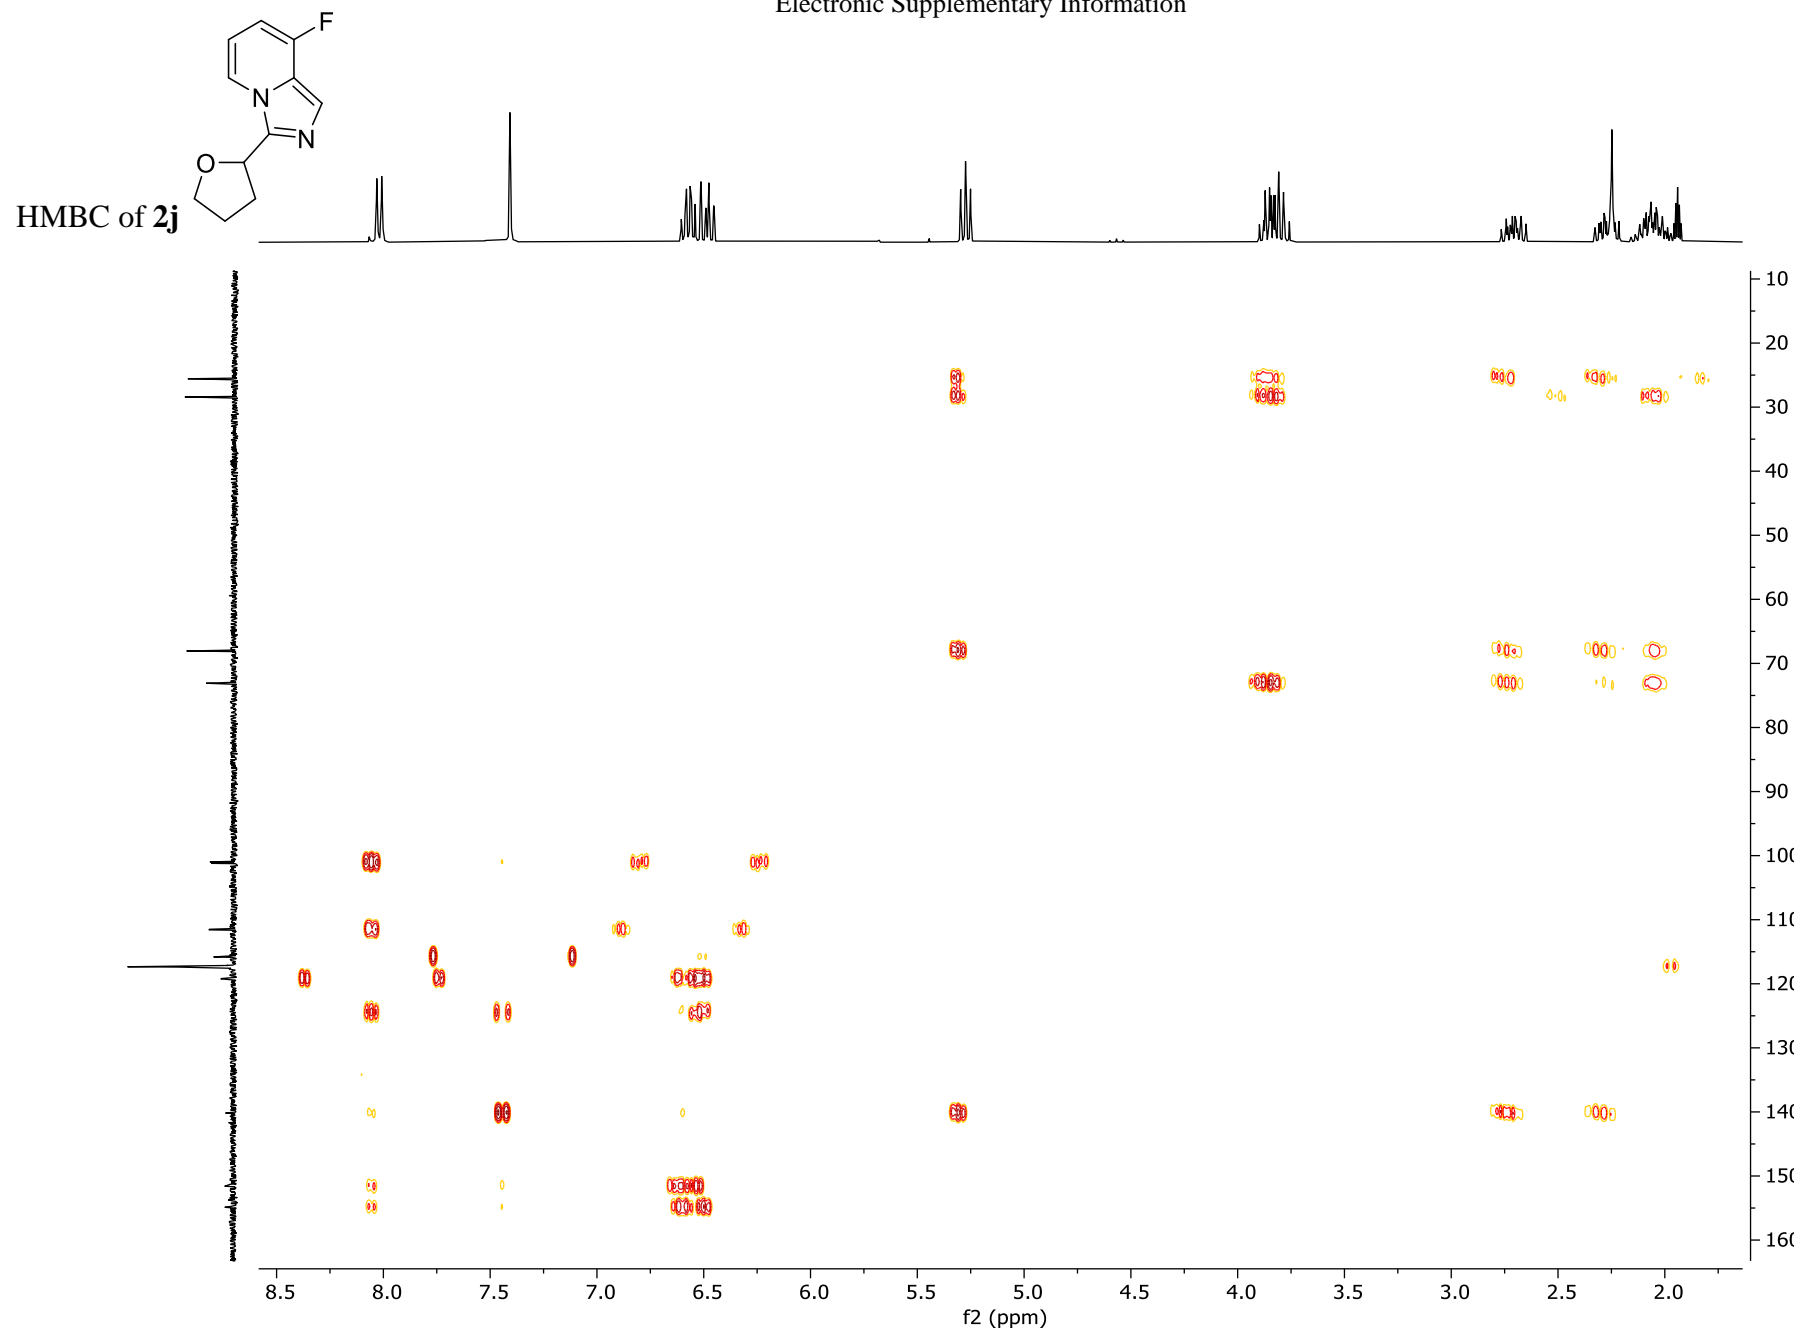

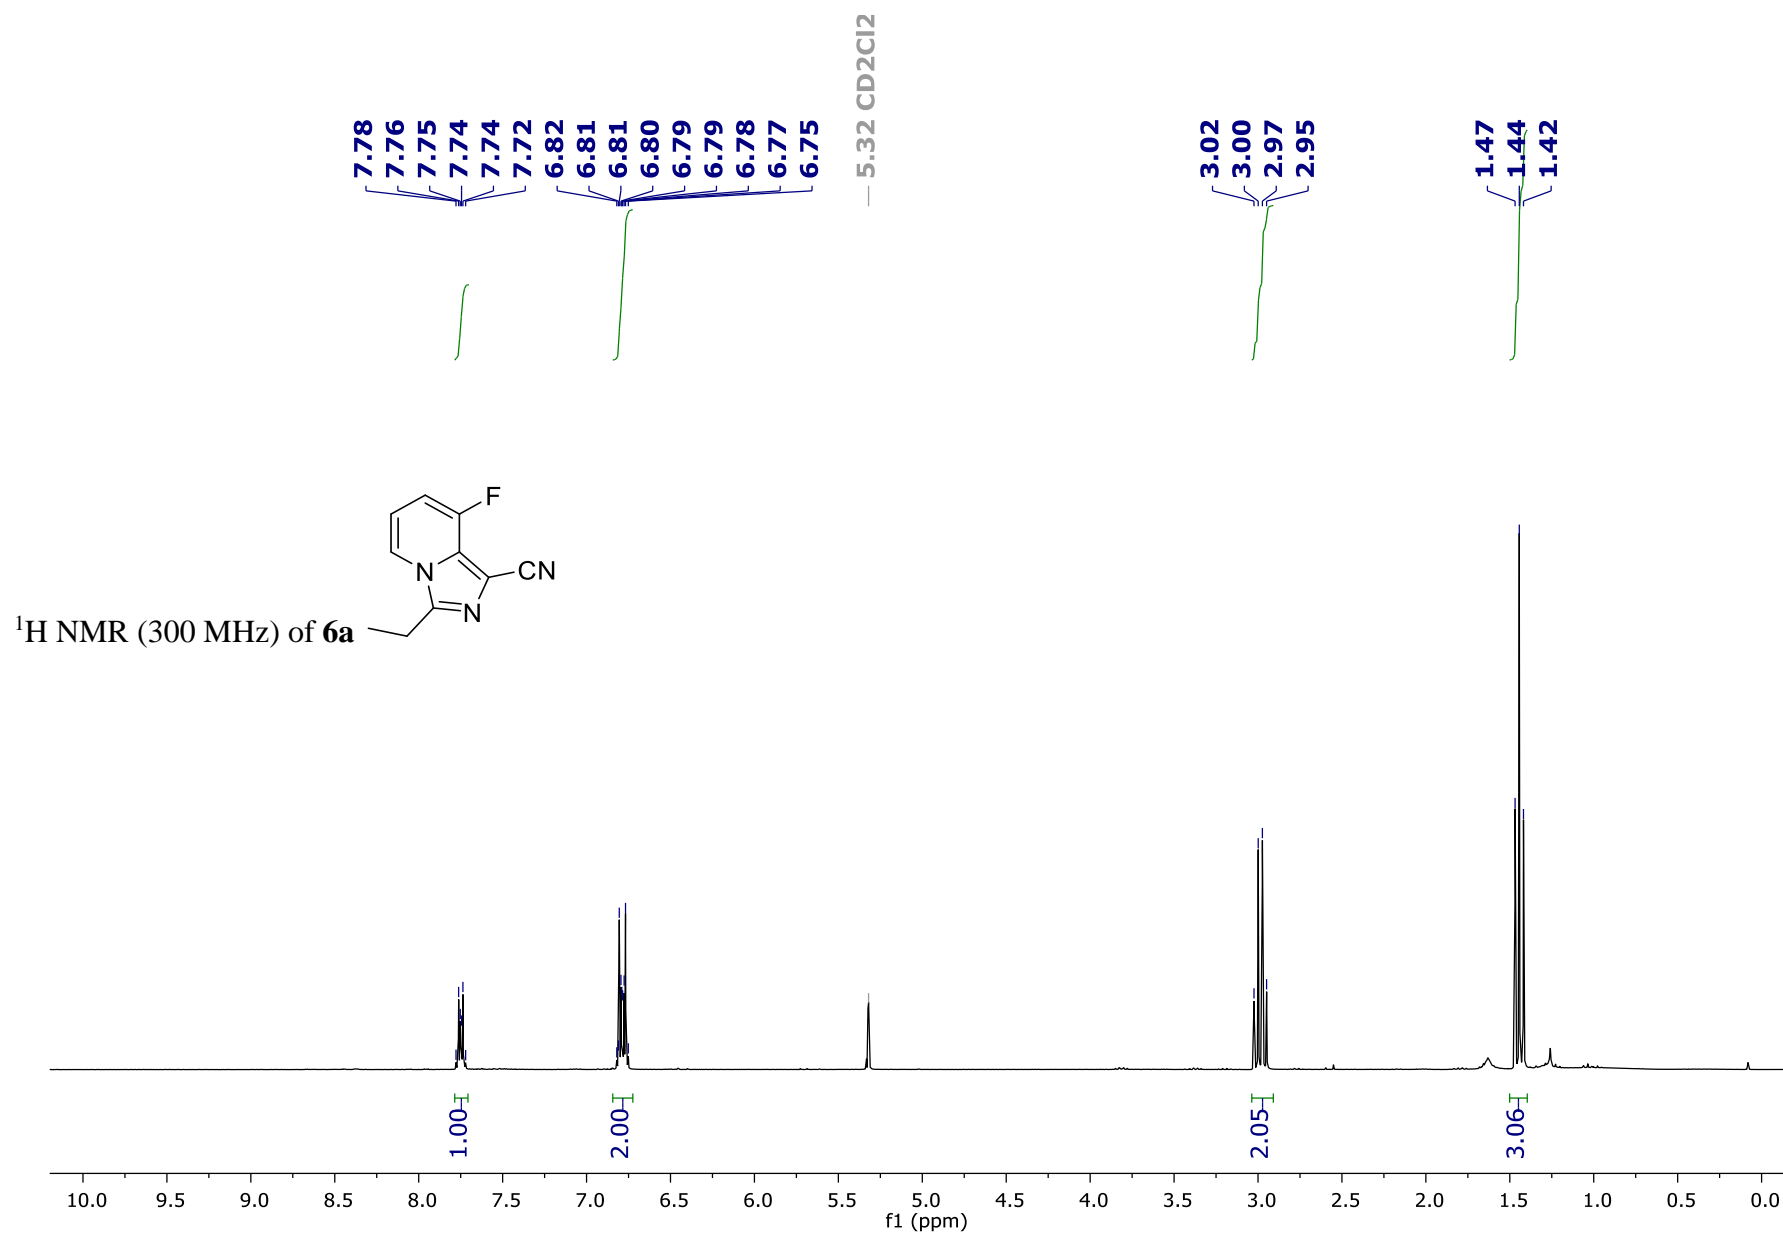

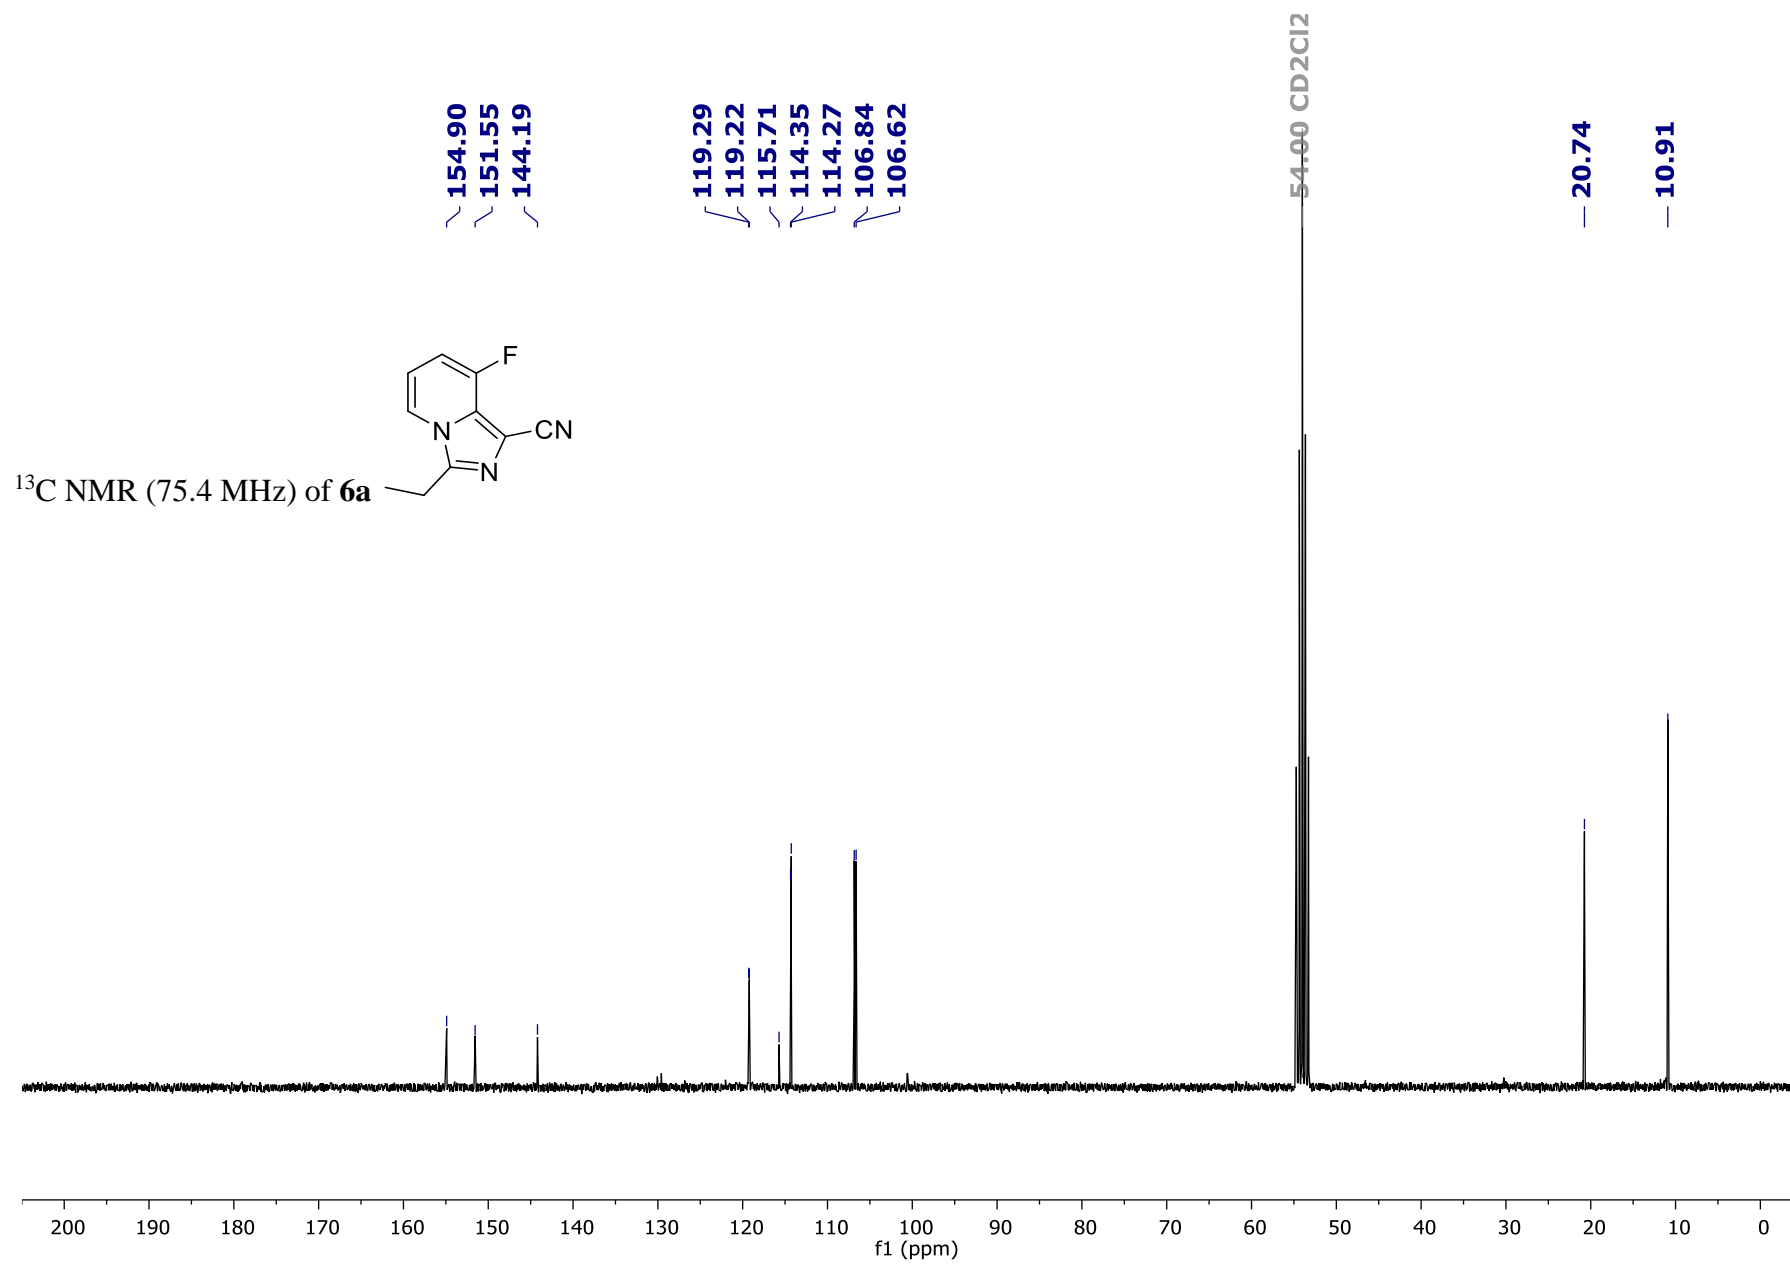



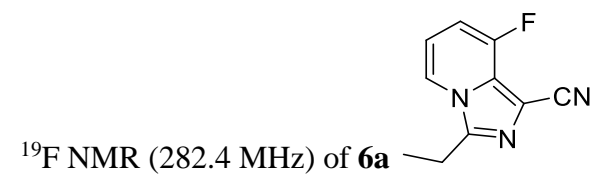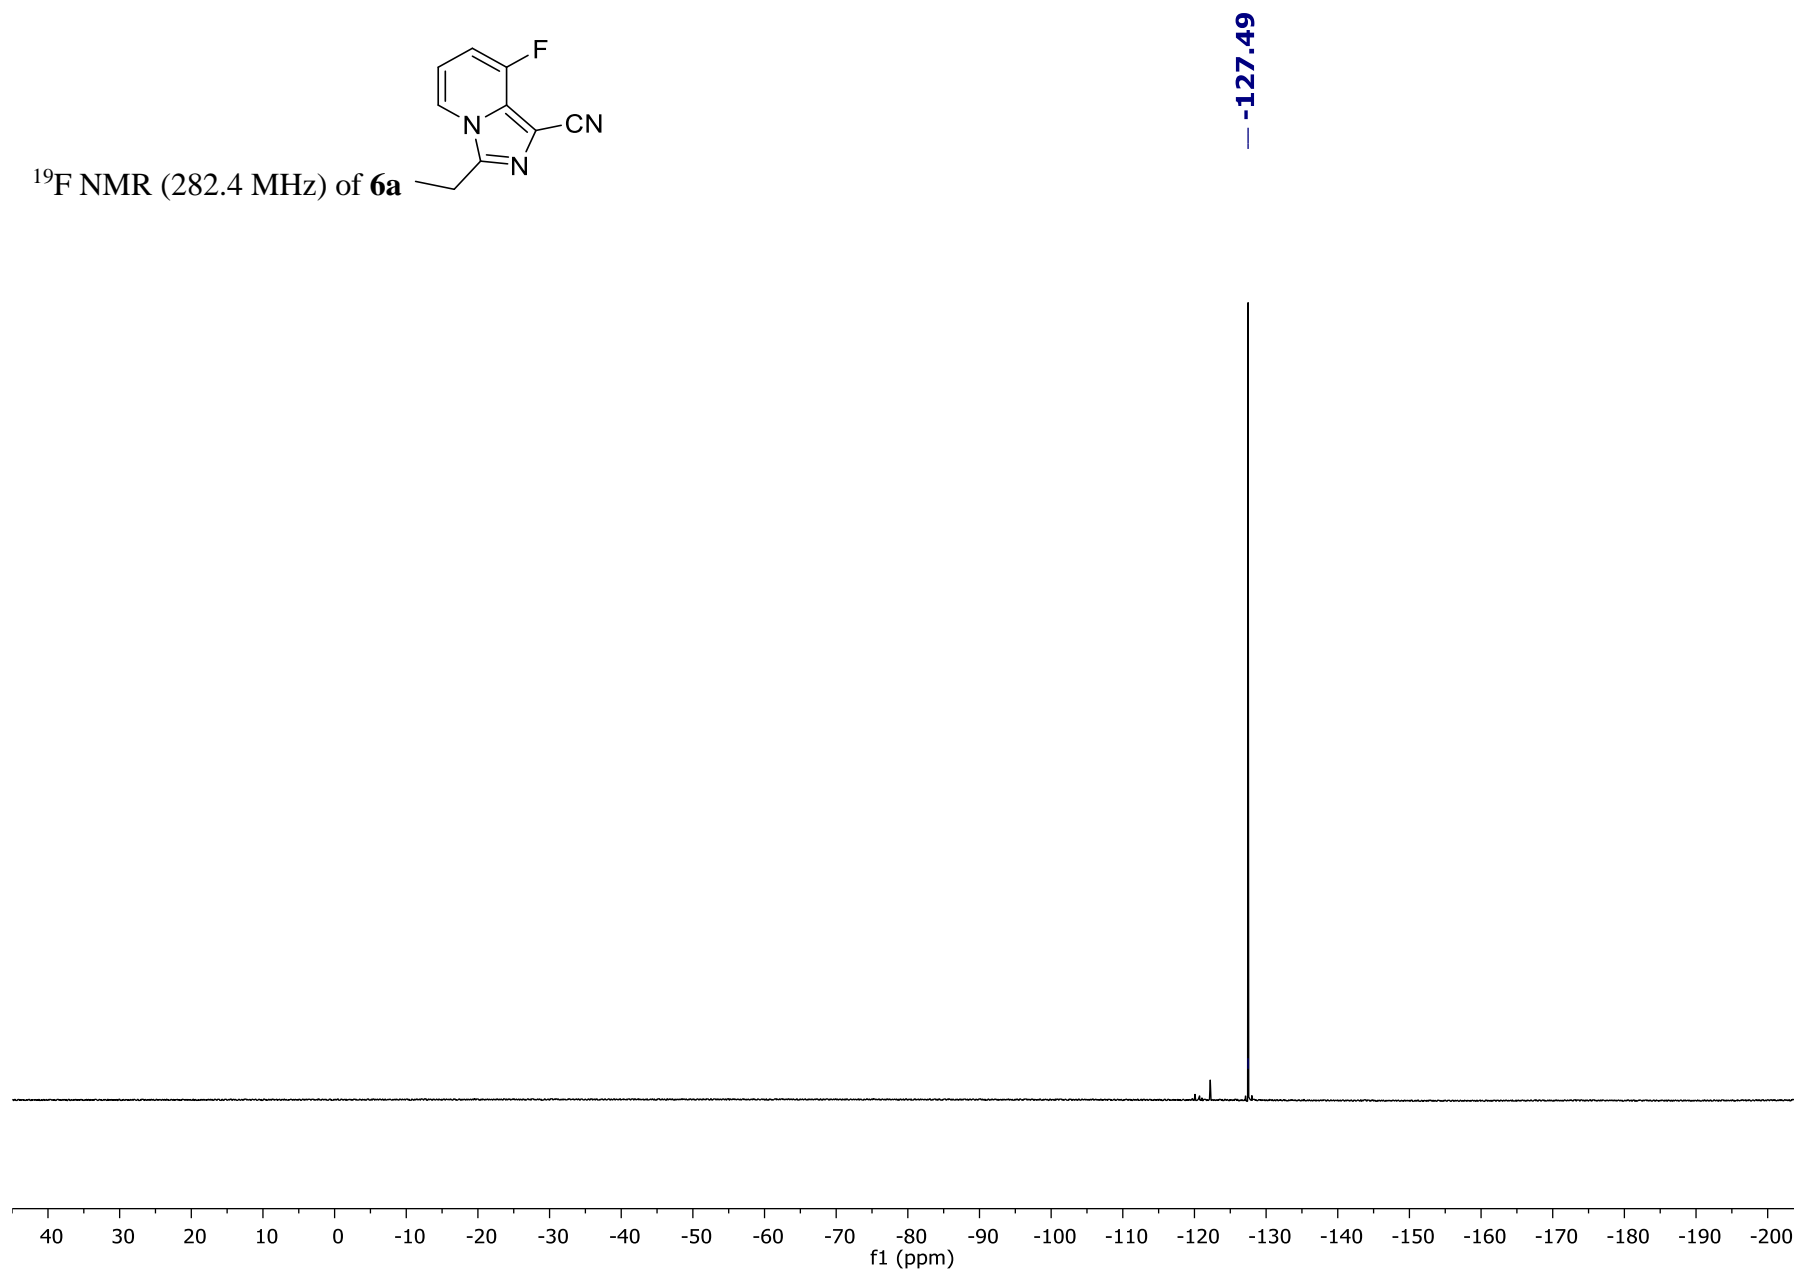

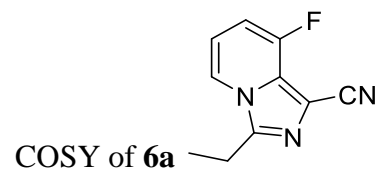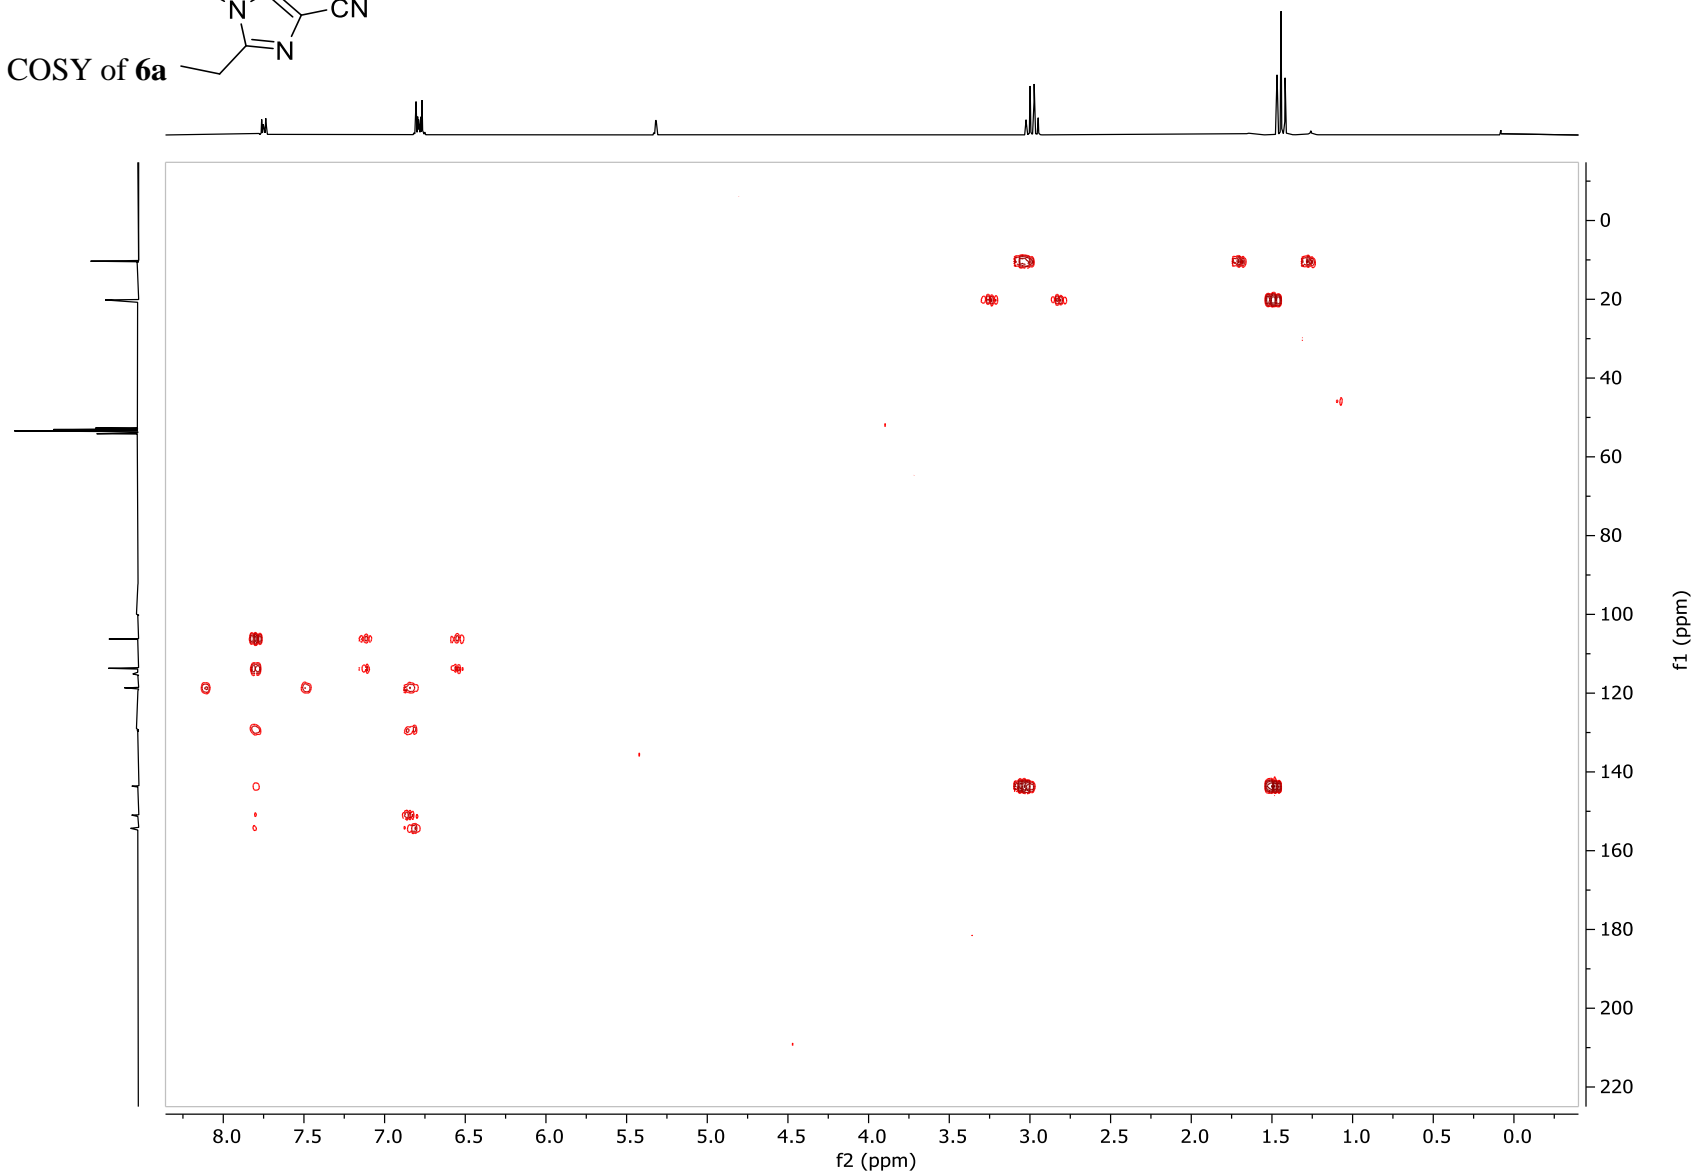

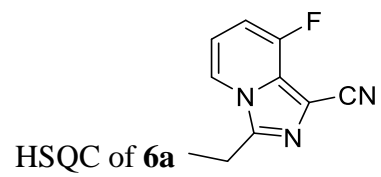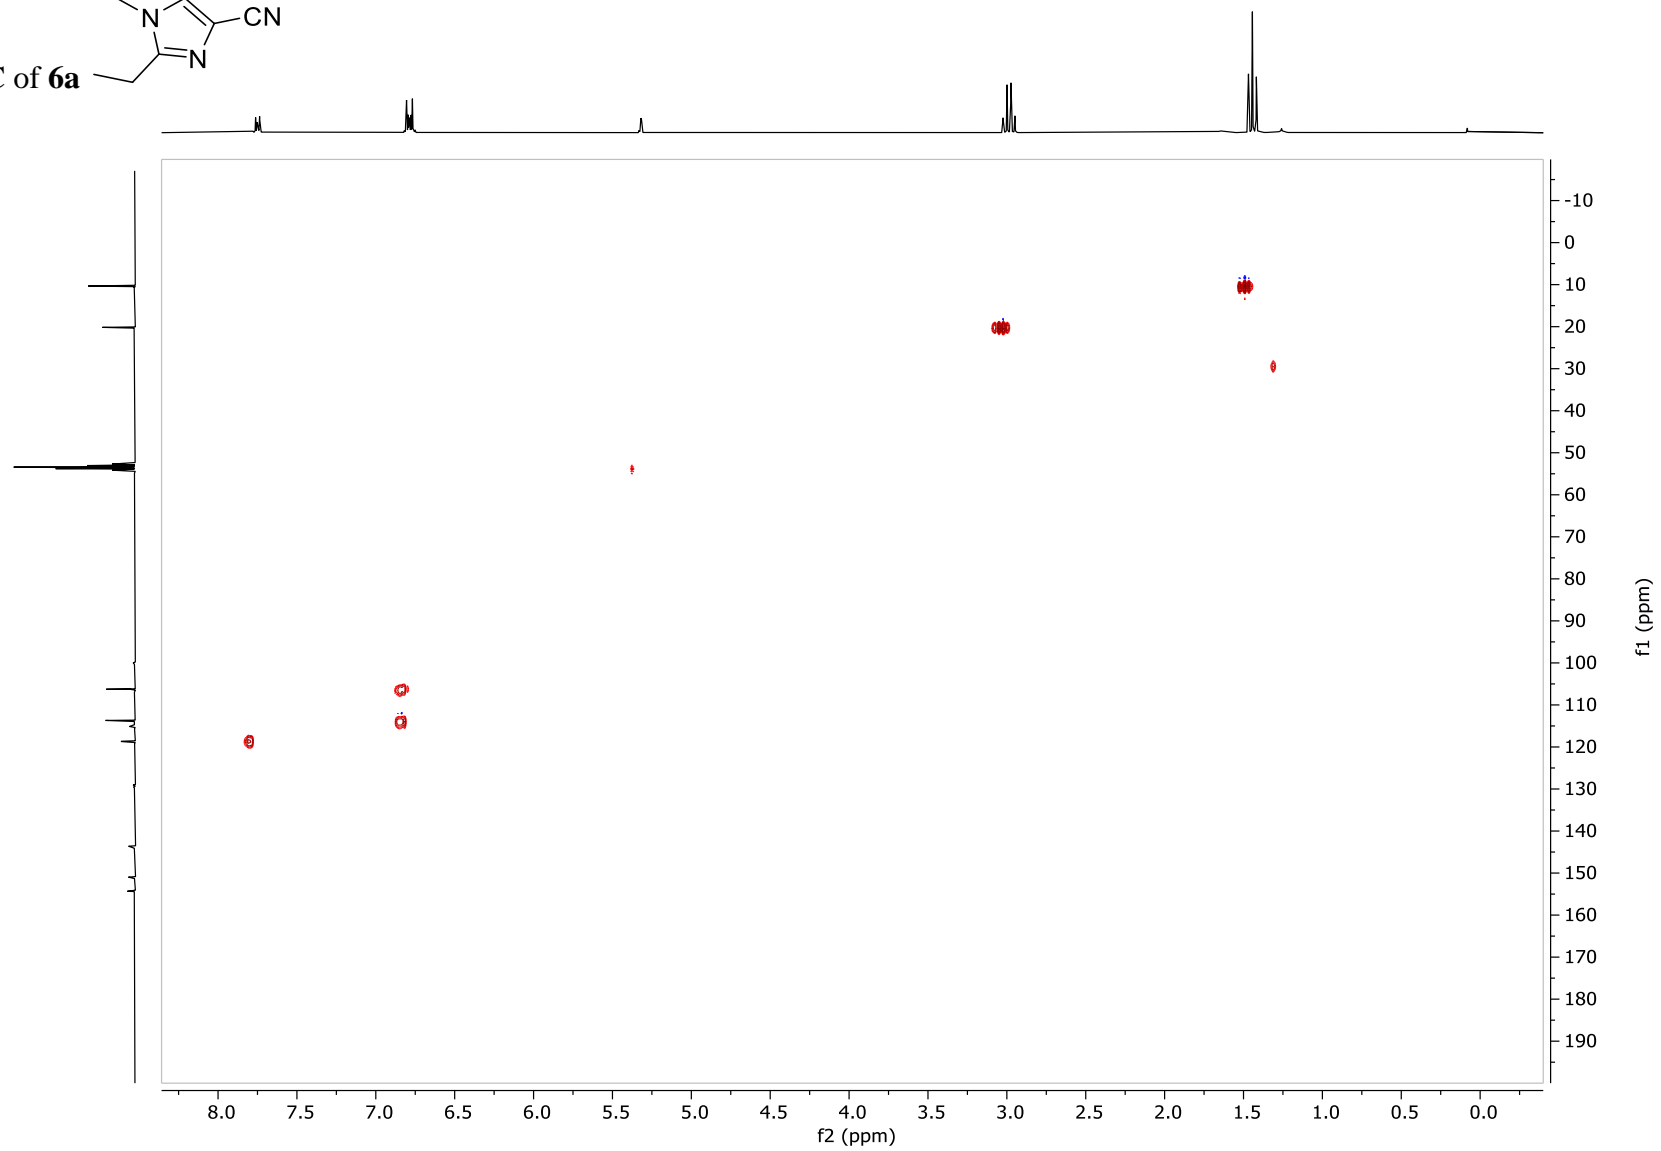

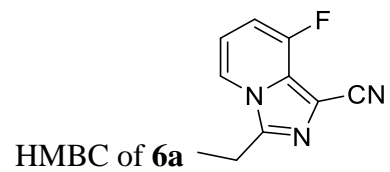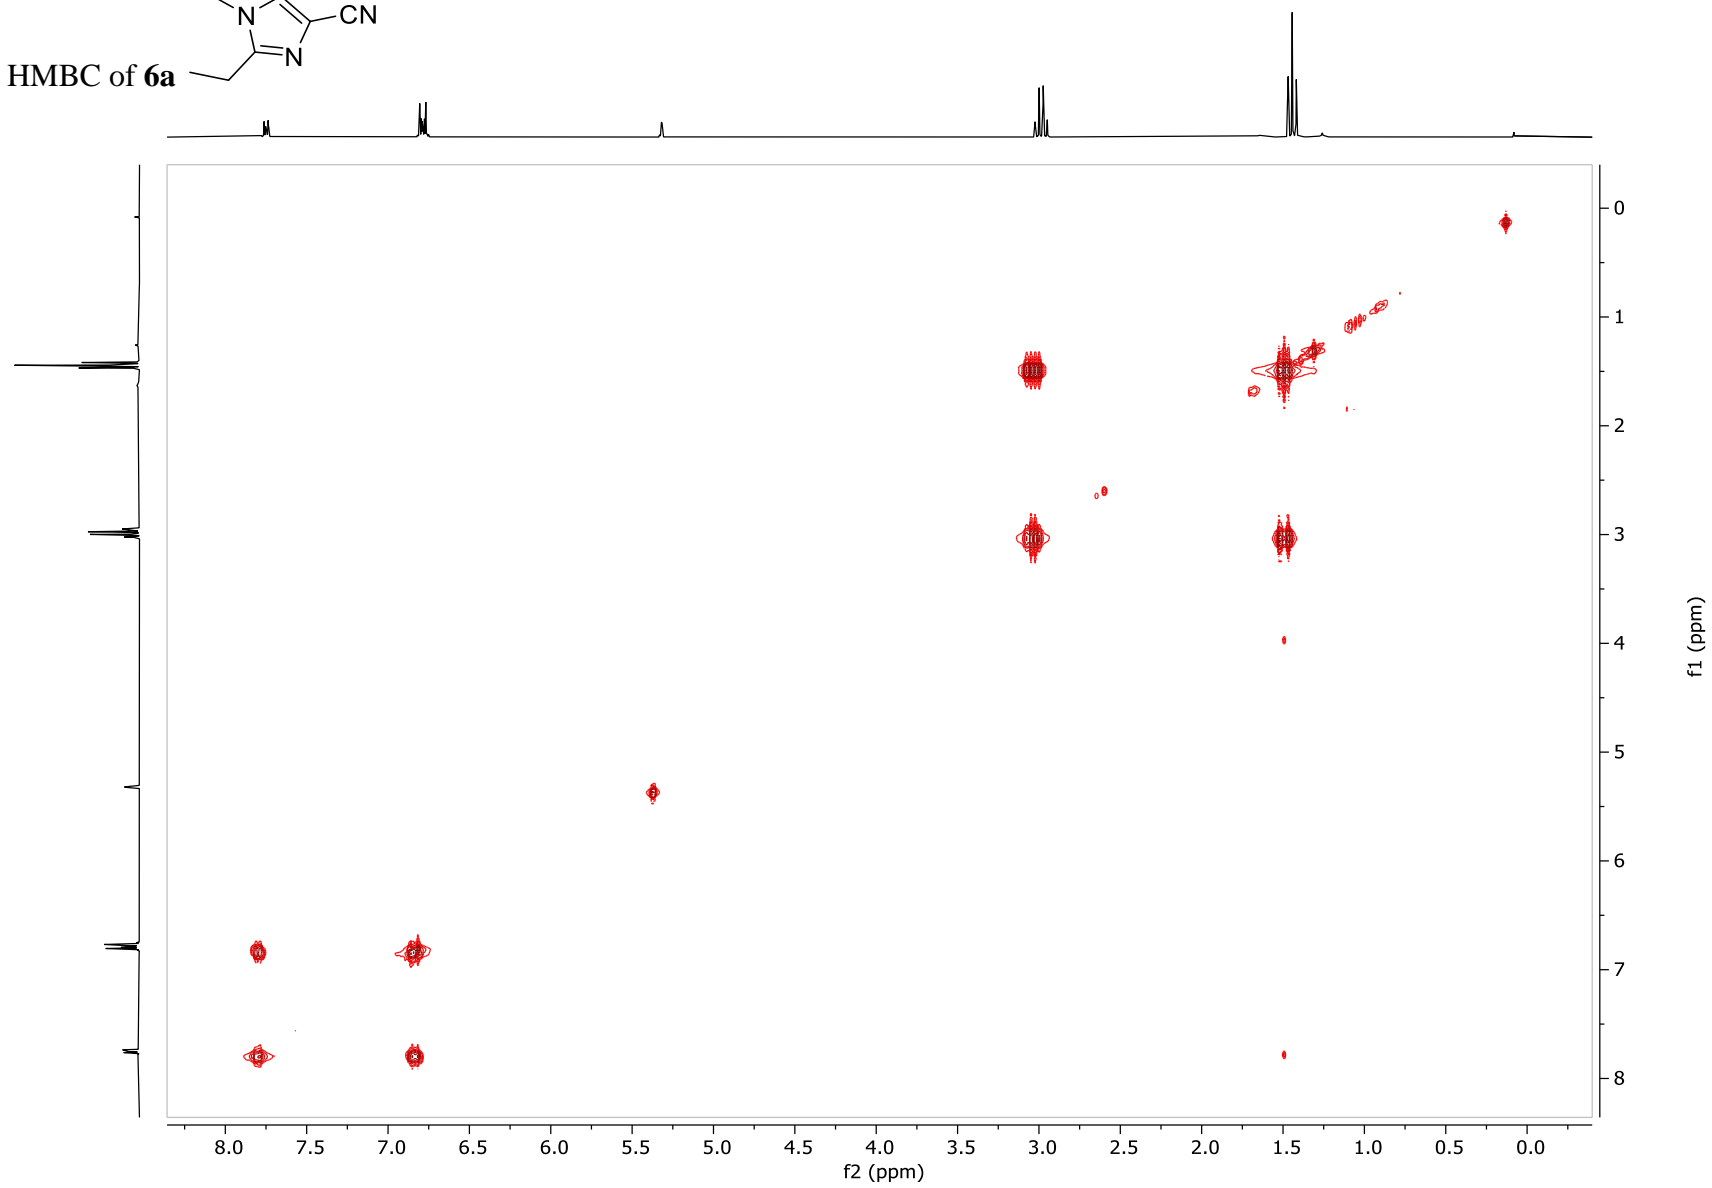

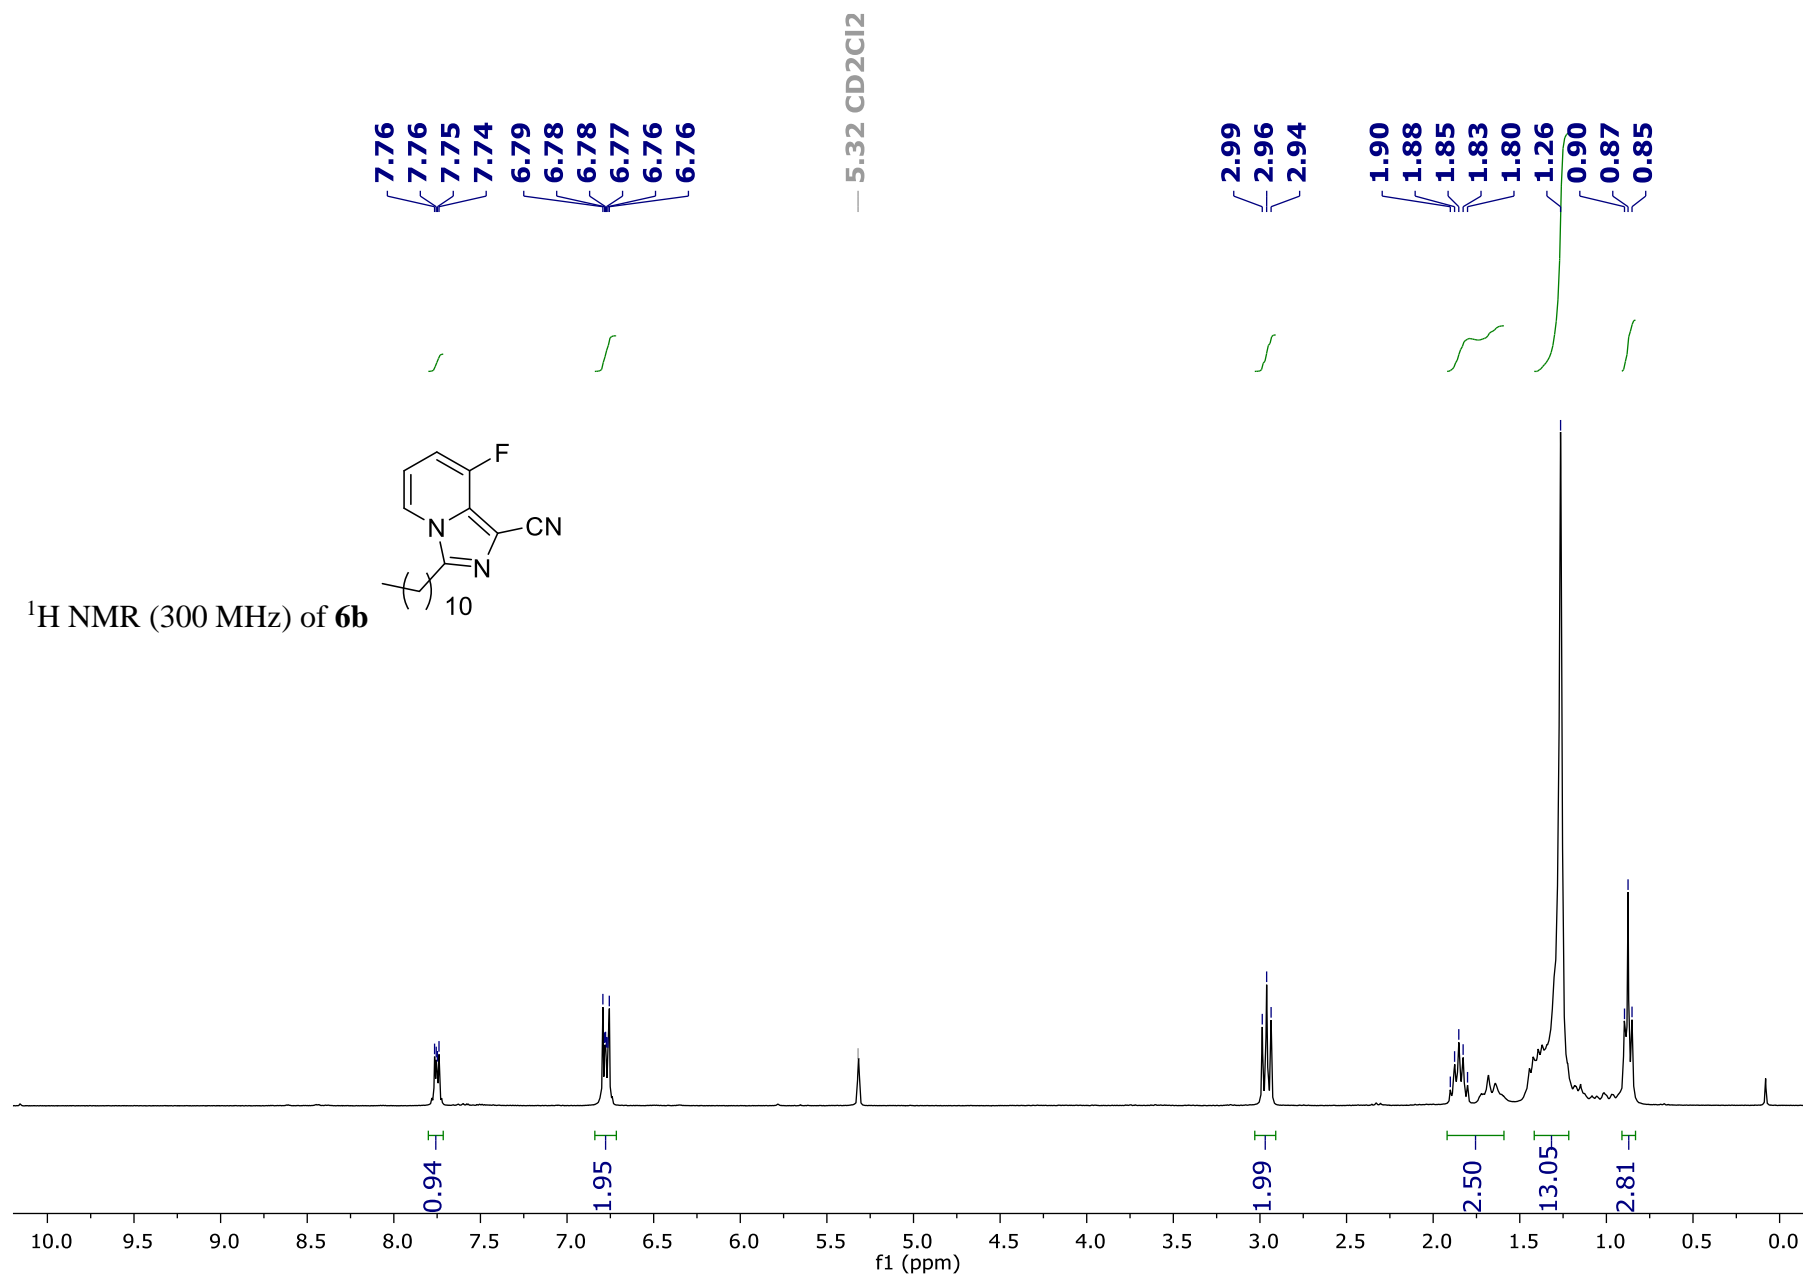

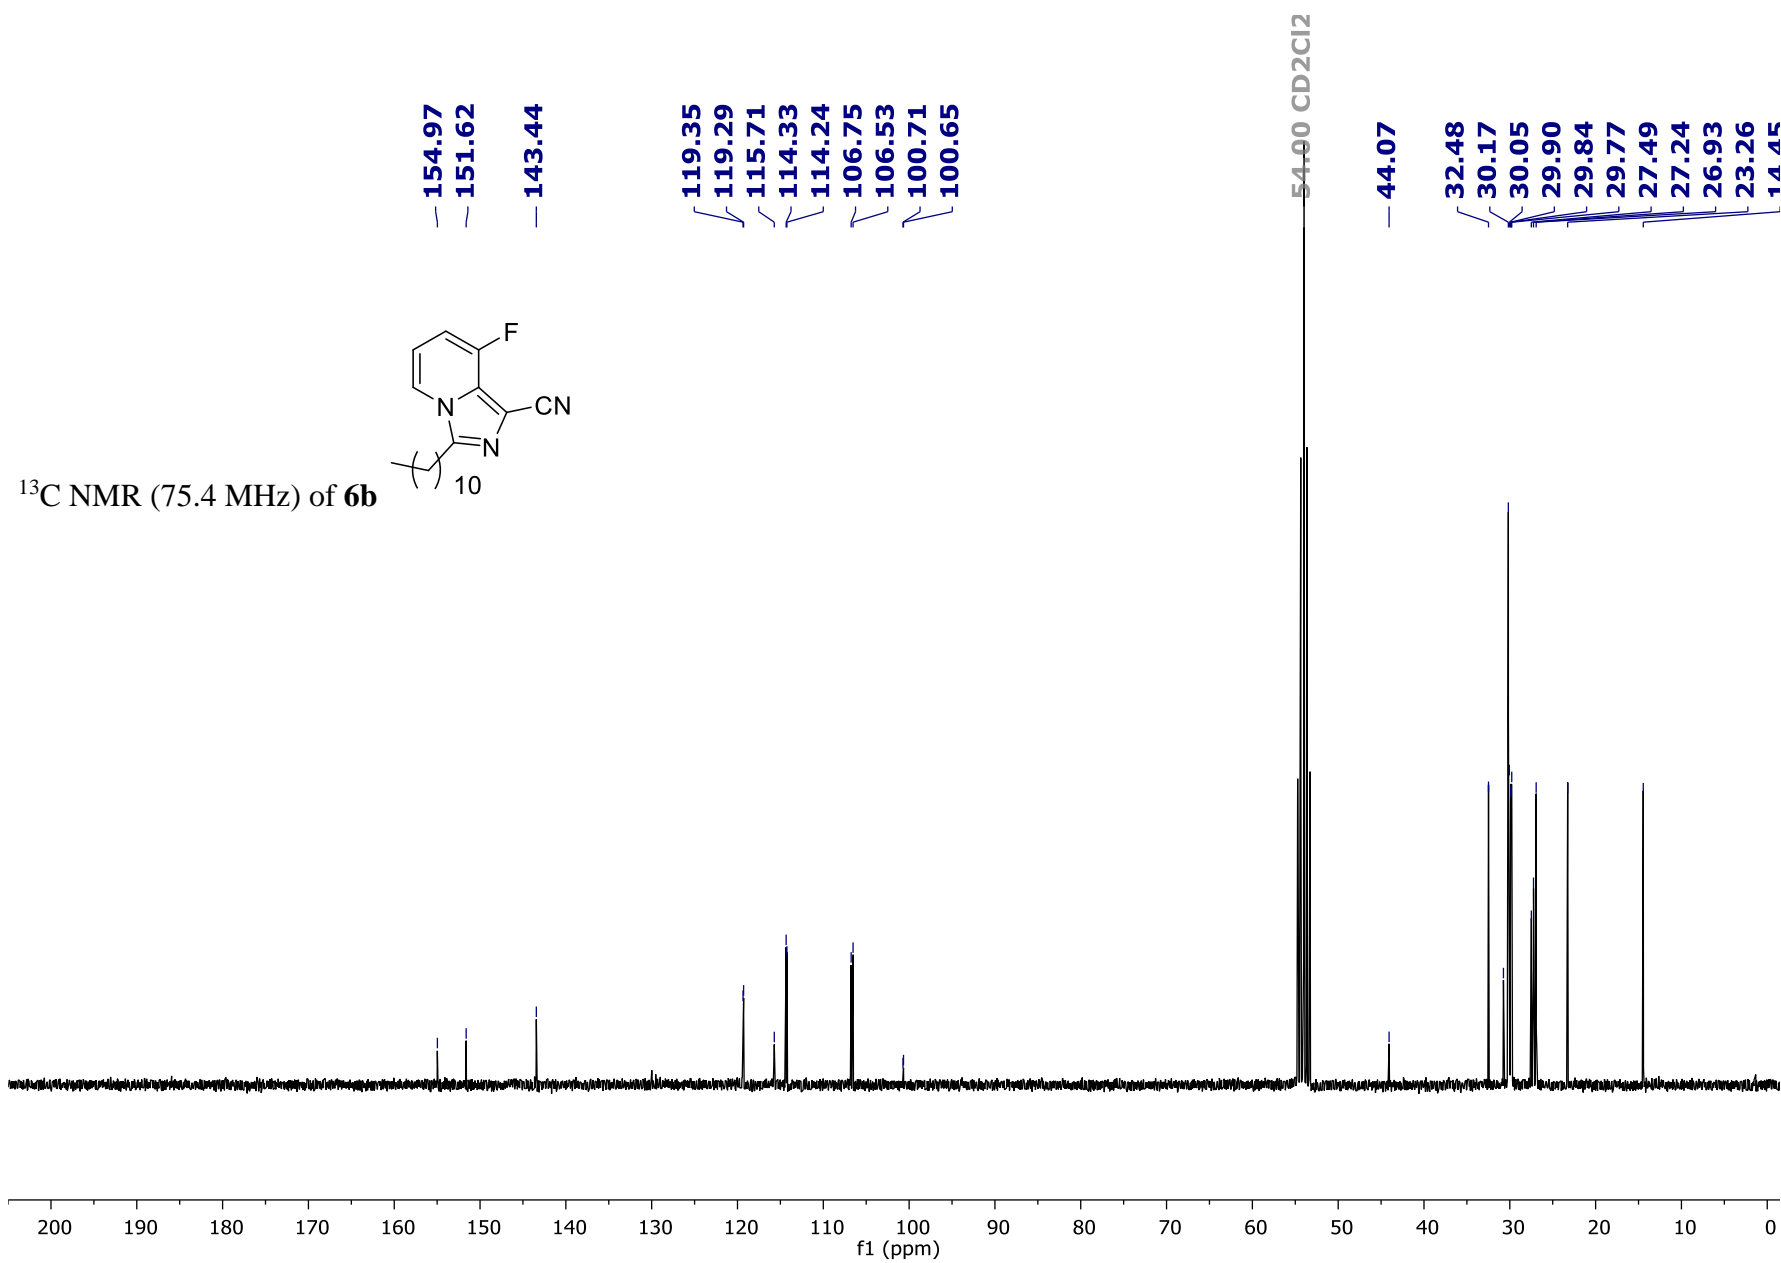

$^{19}\text{F}$  NMR (282.4 MHz) of **6b**

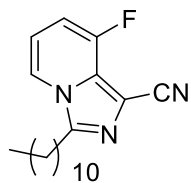

— -124.57

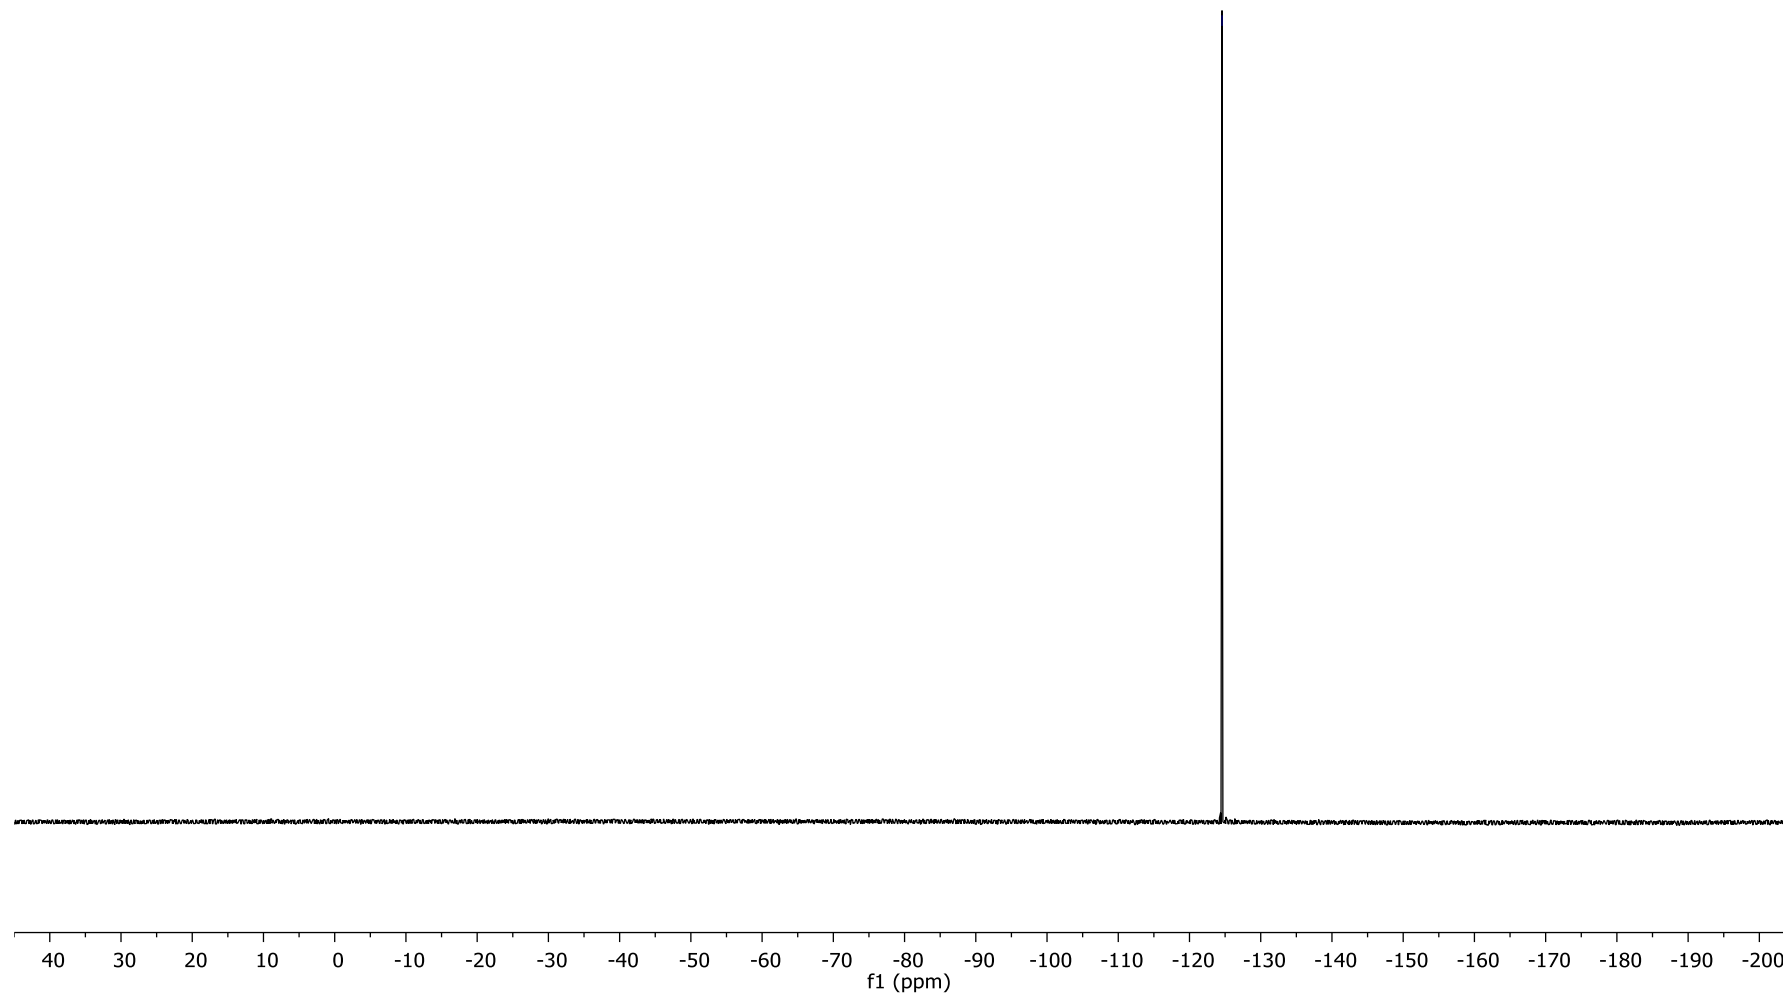

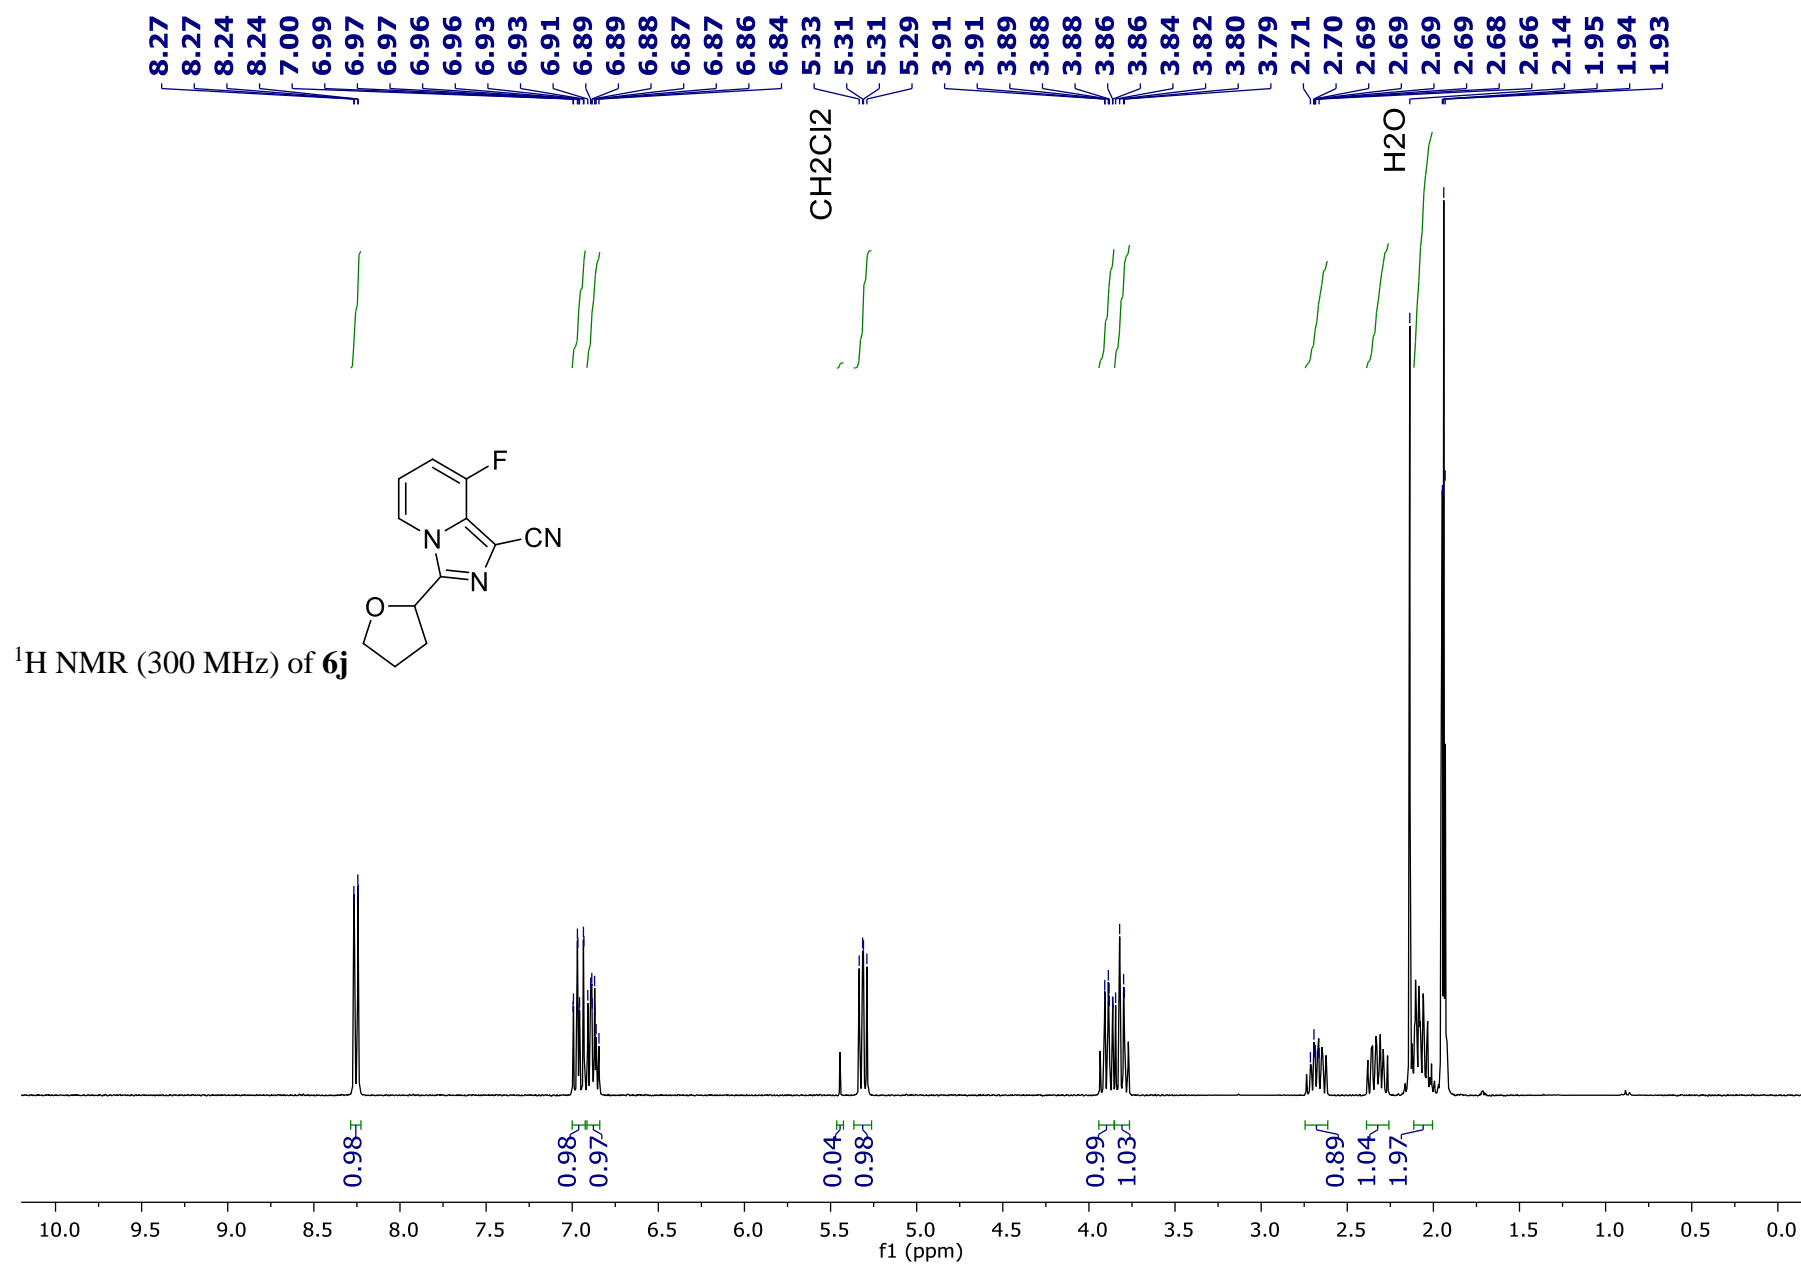



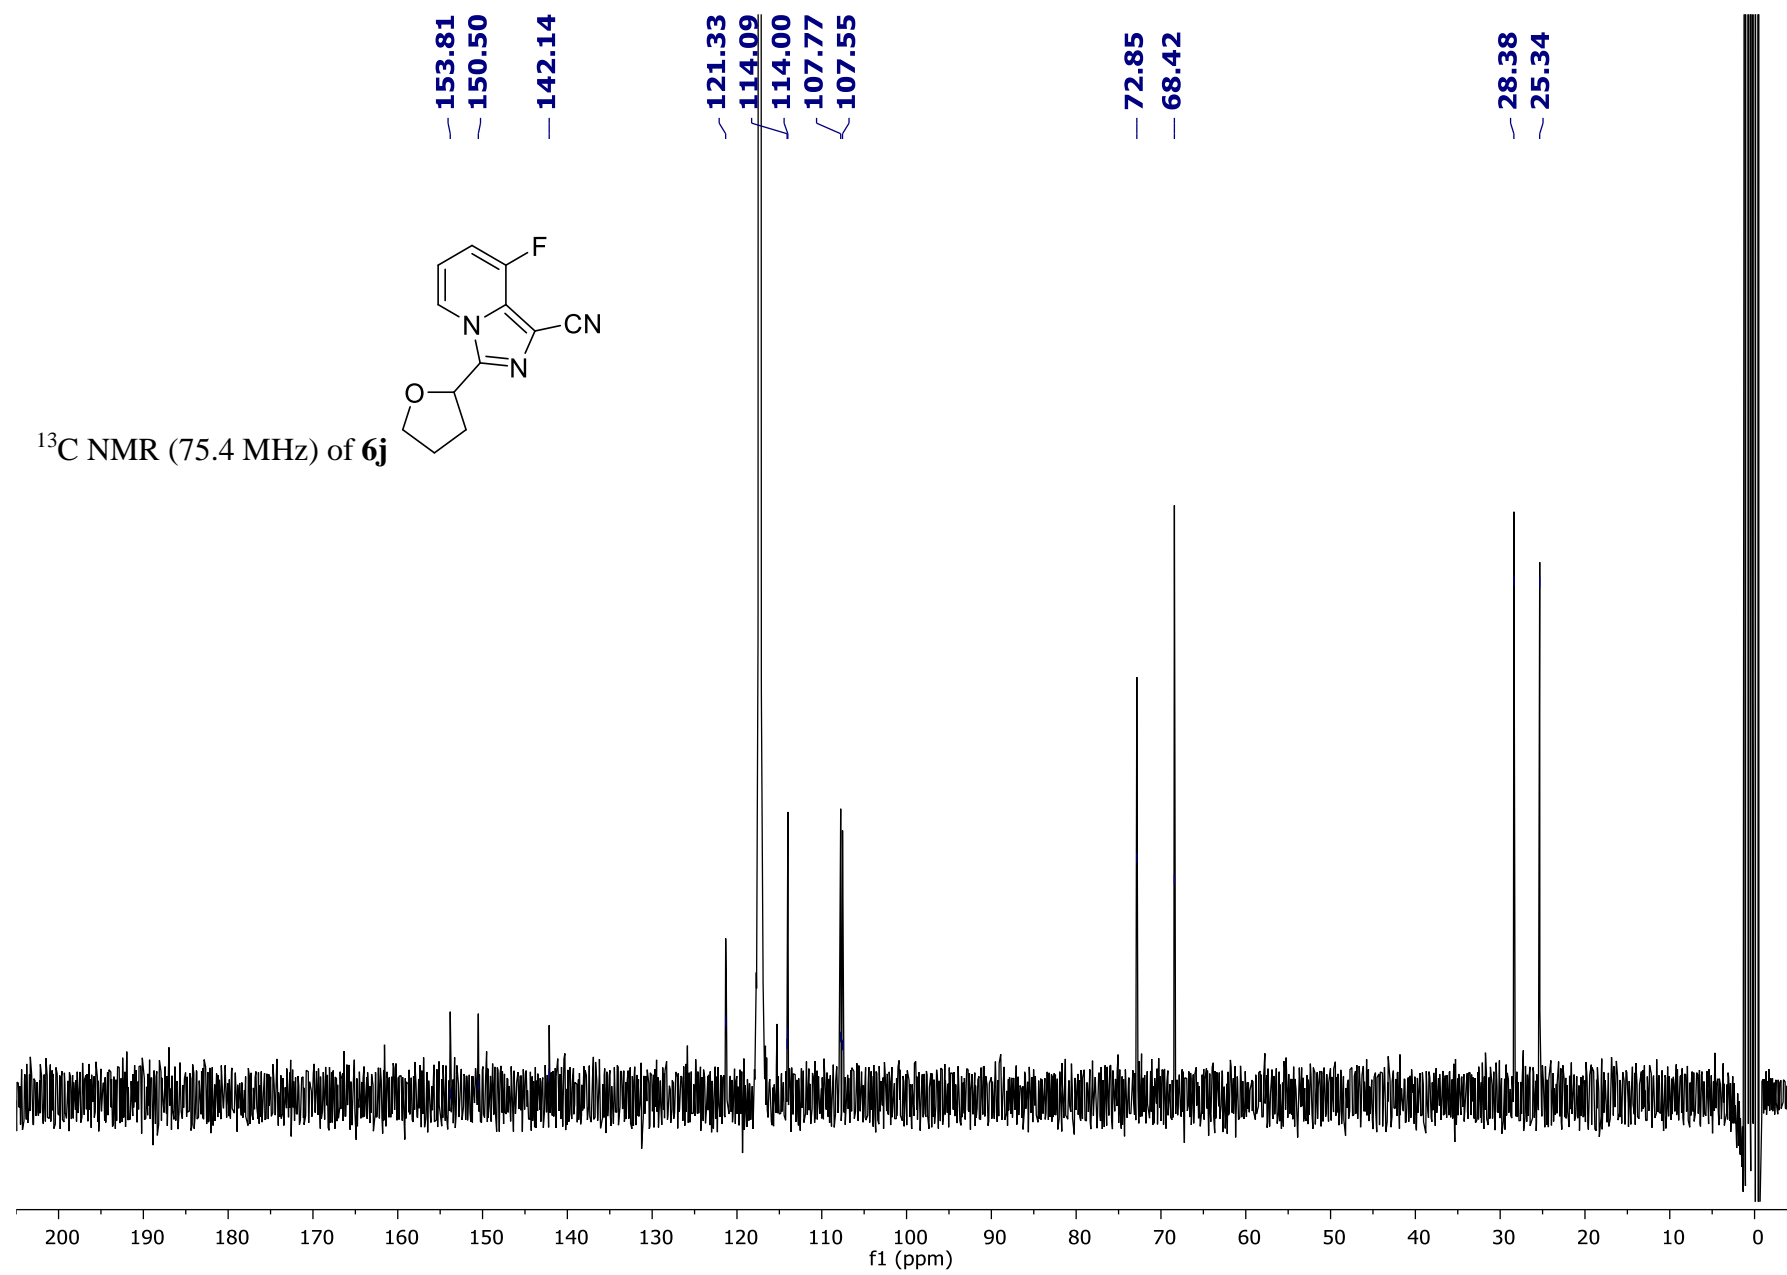

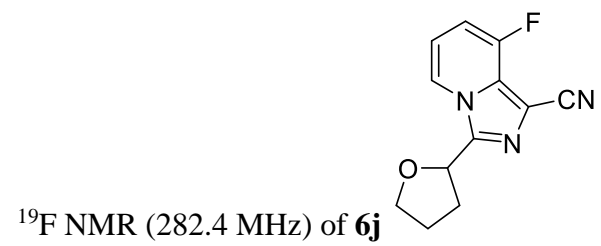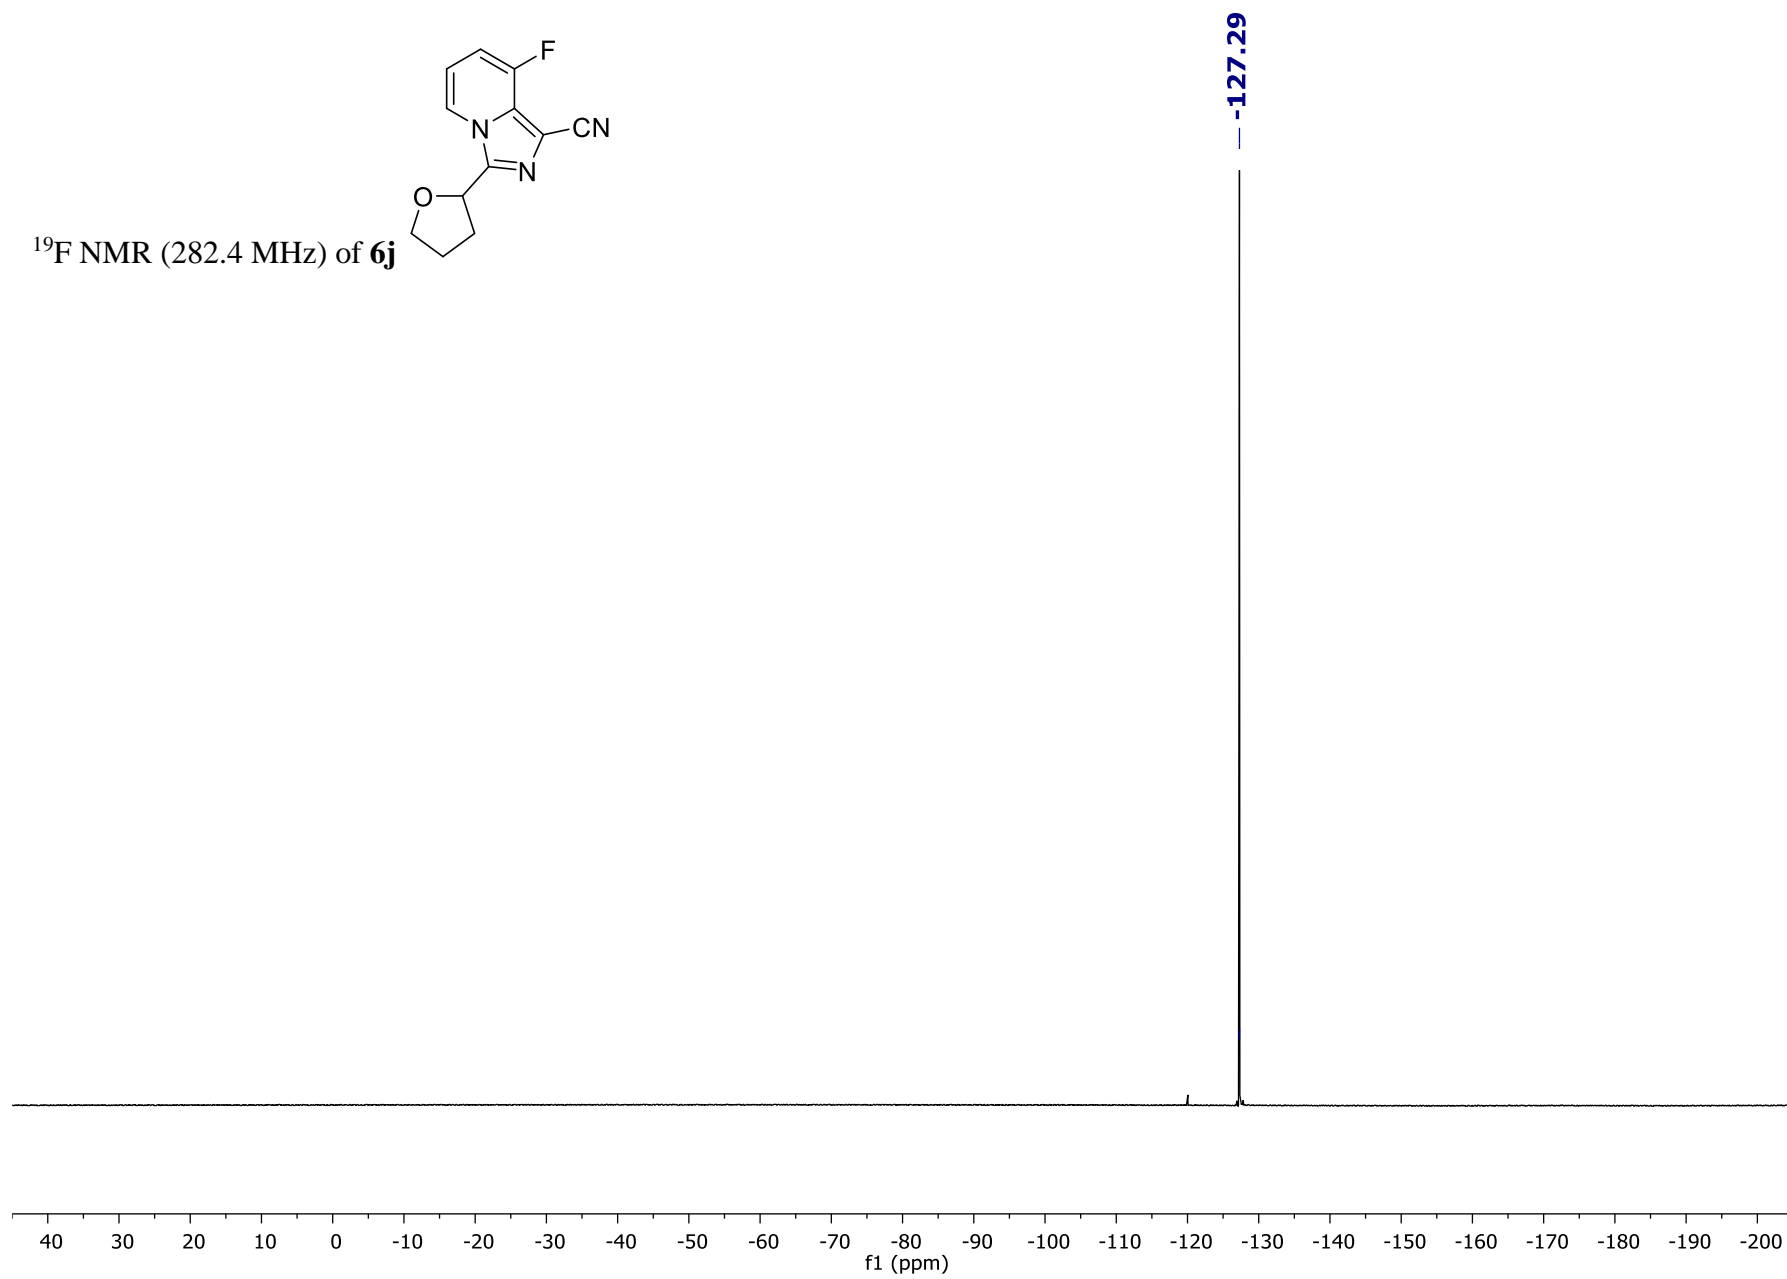

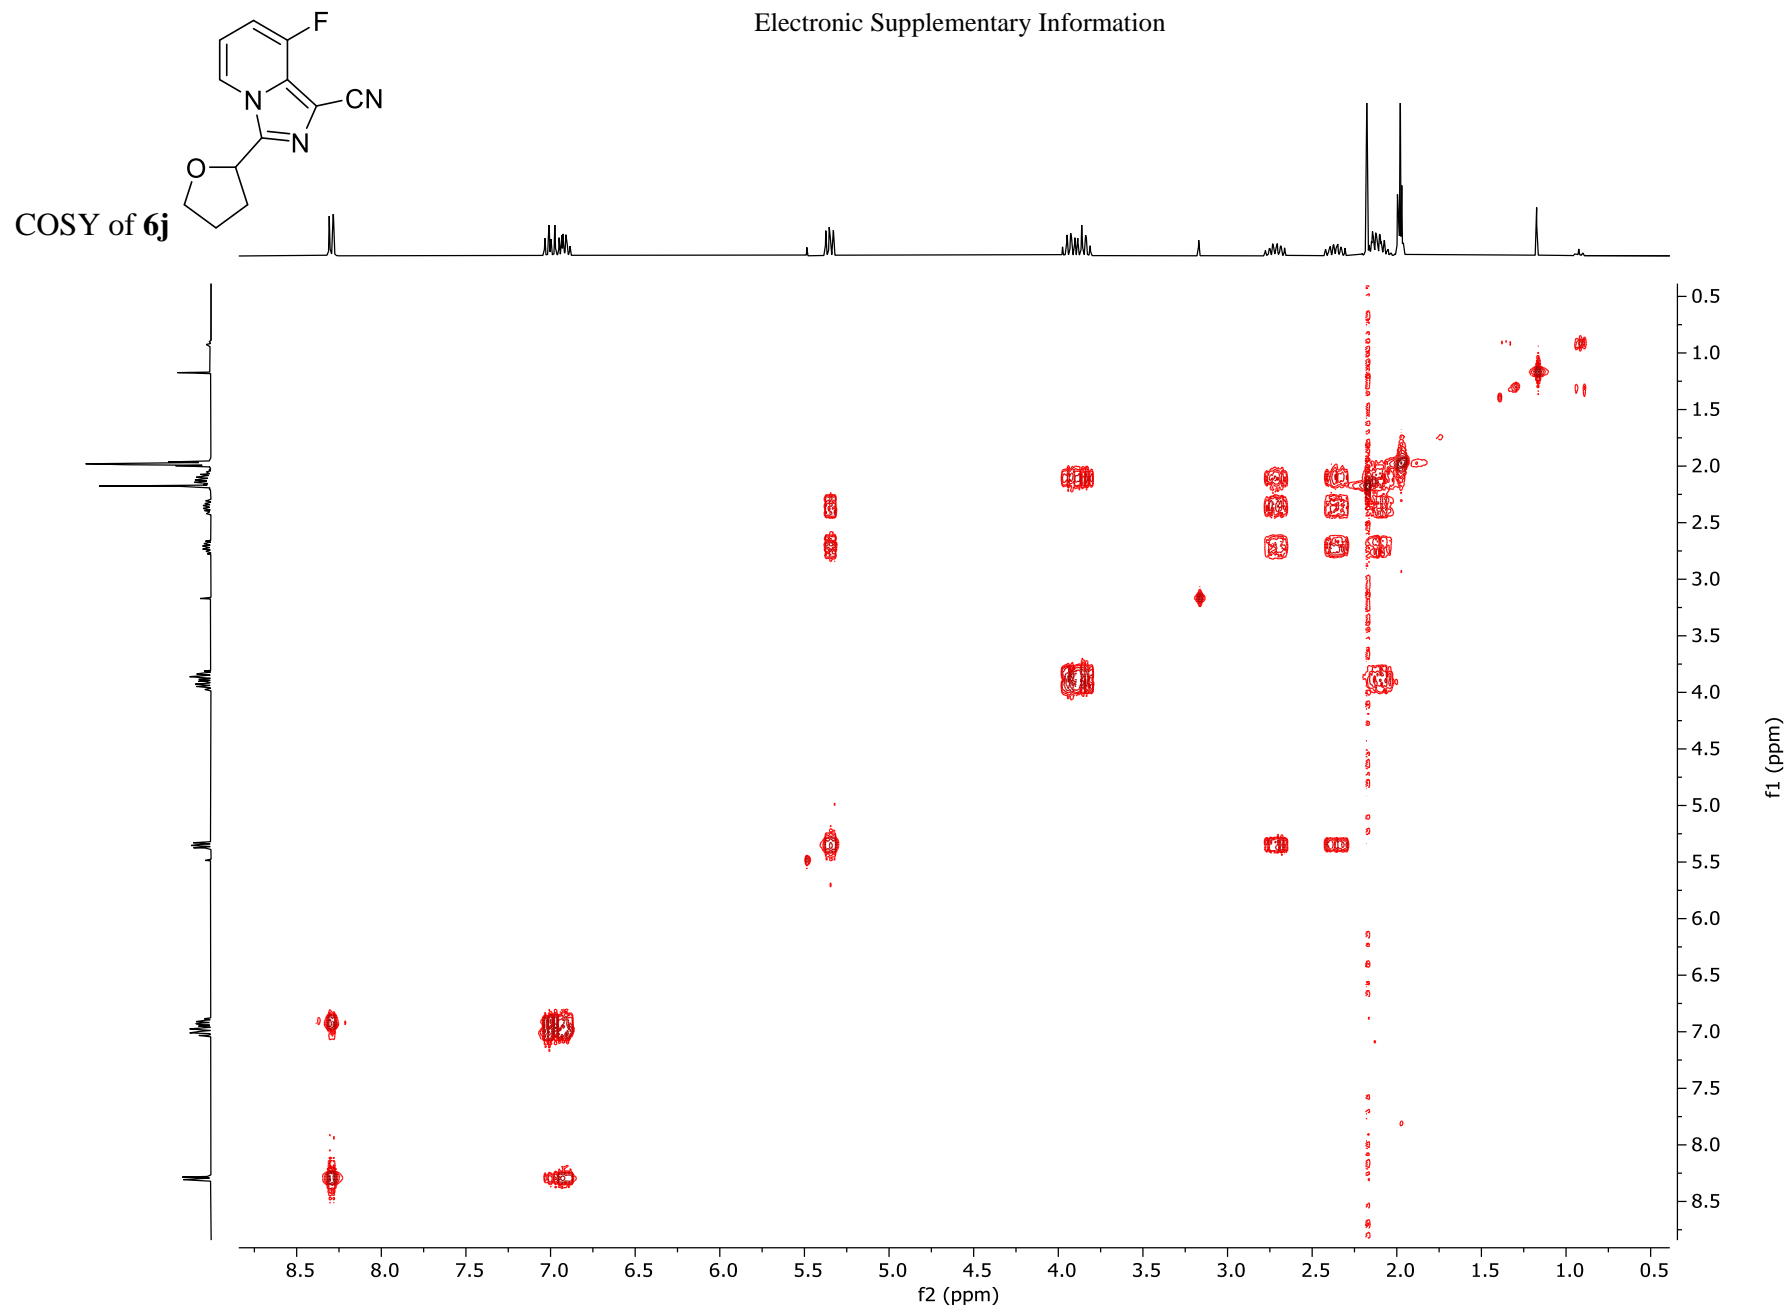

HSQC of **6j**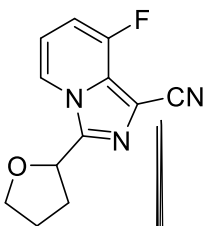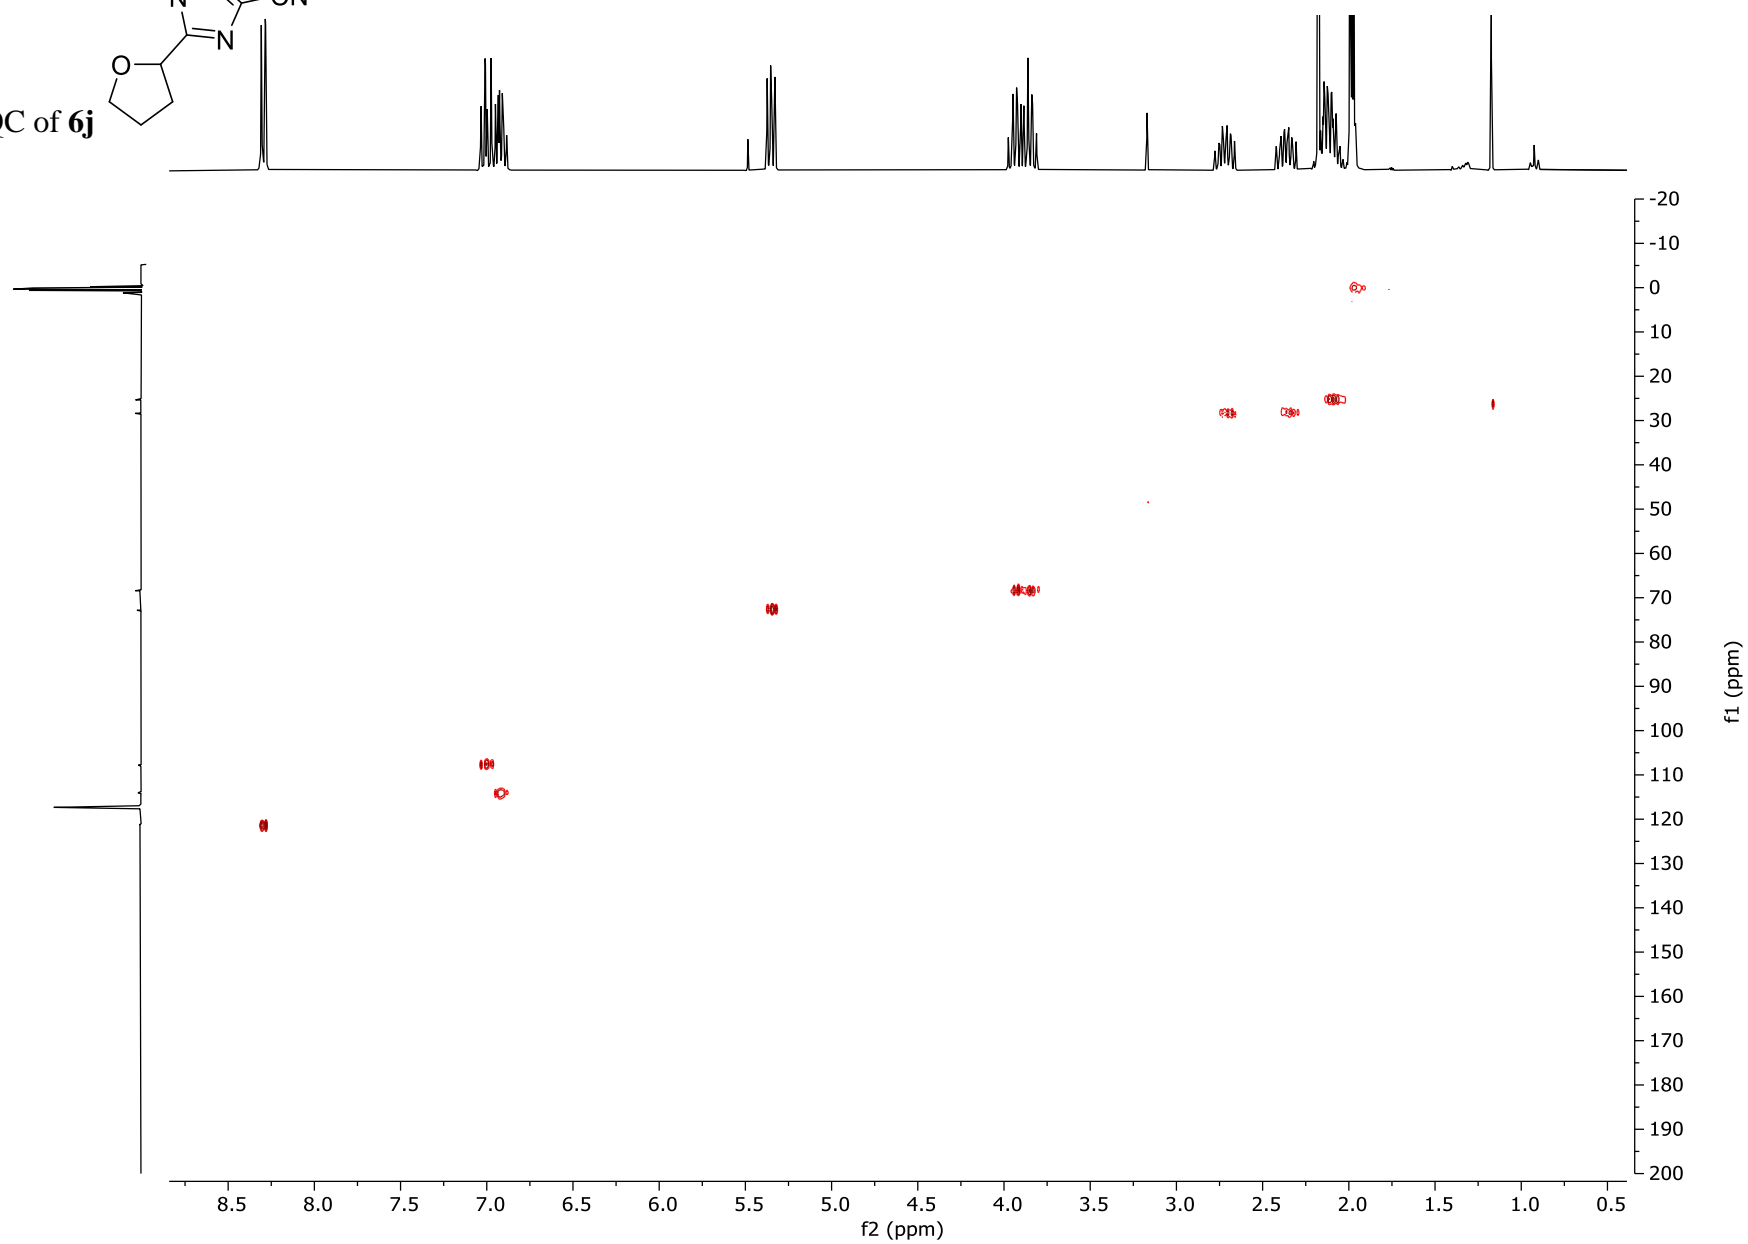

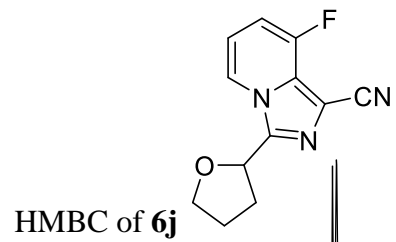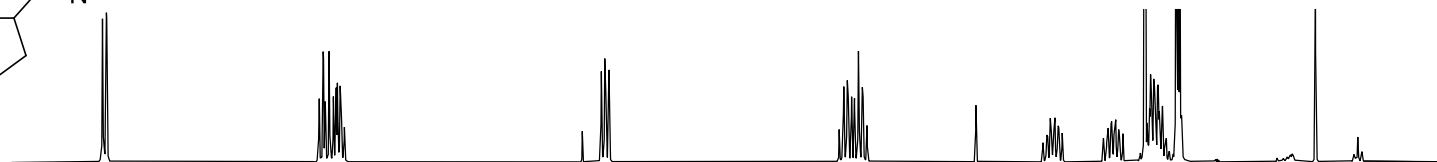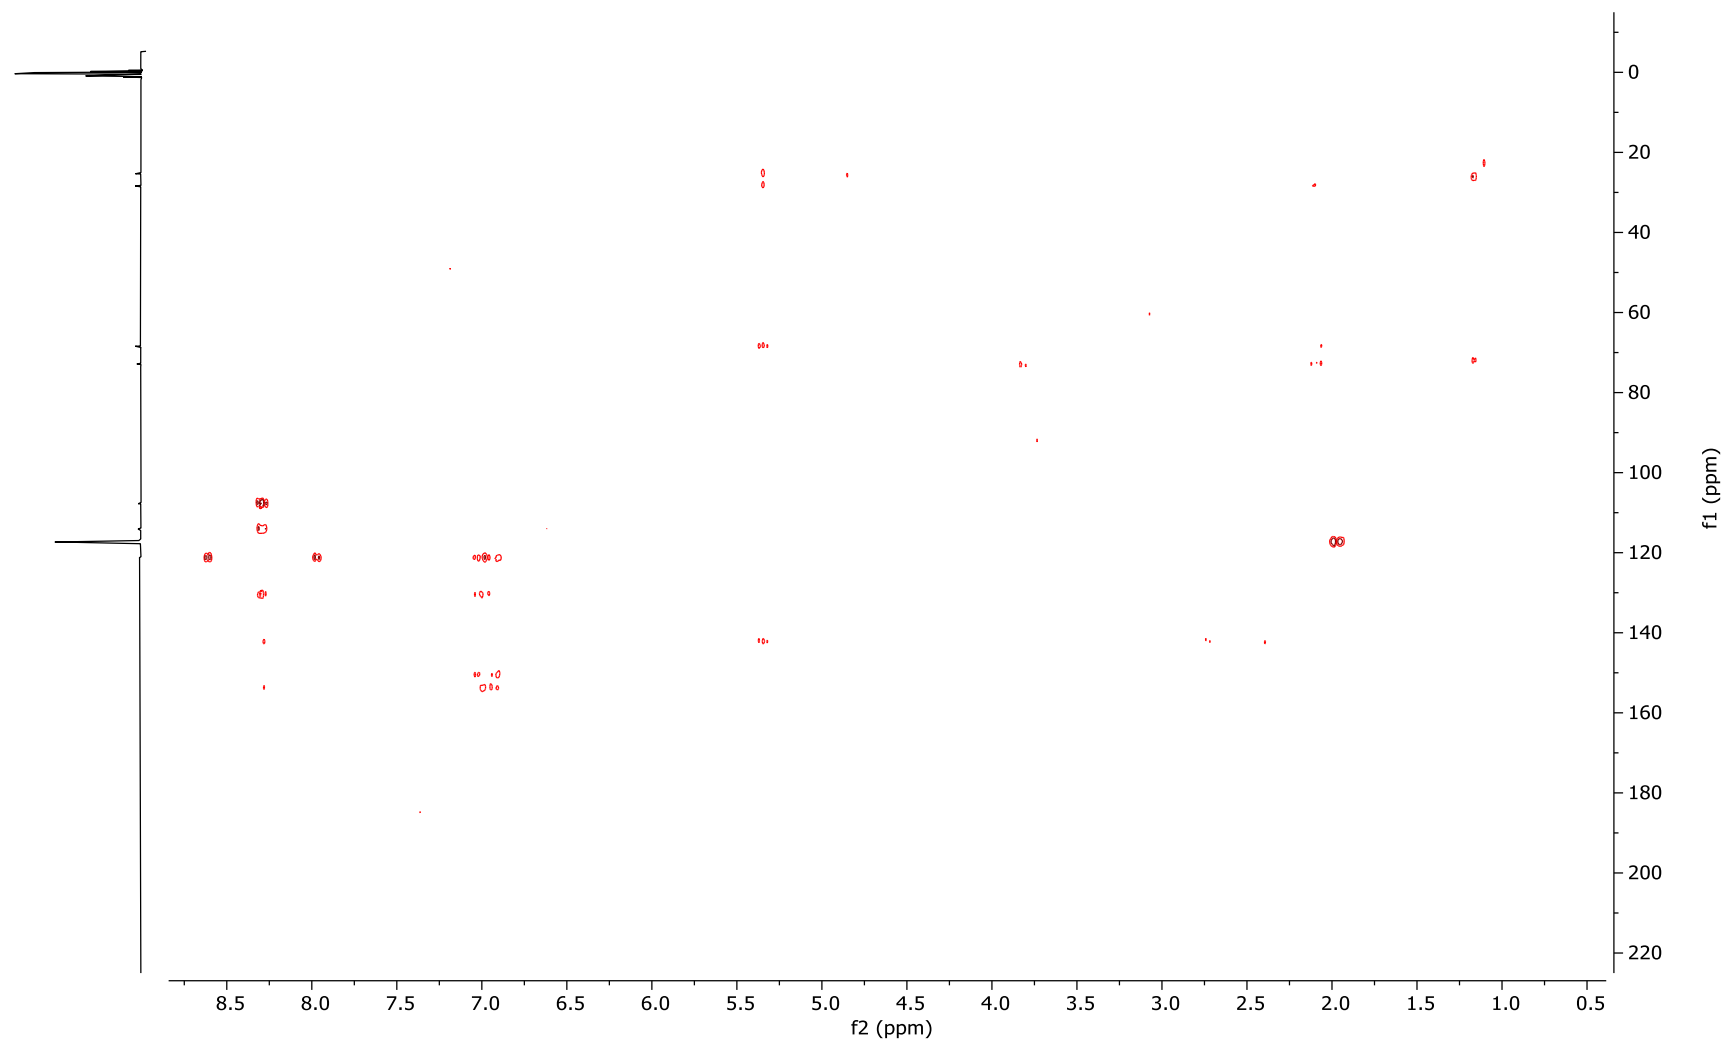

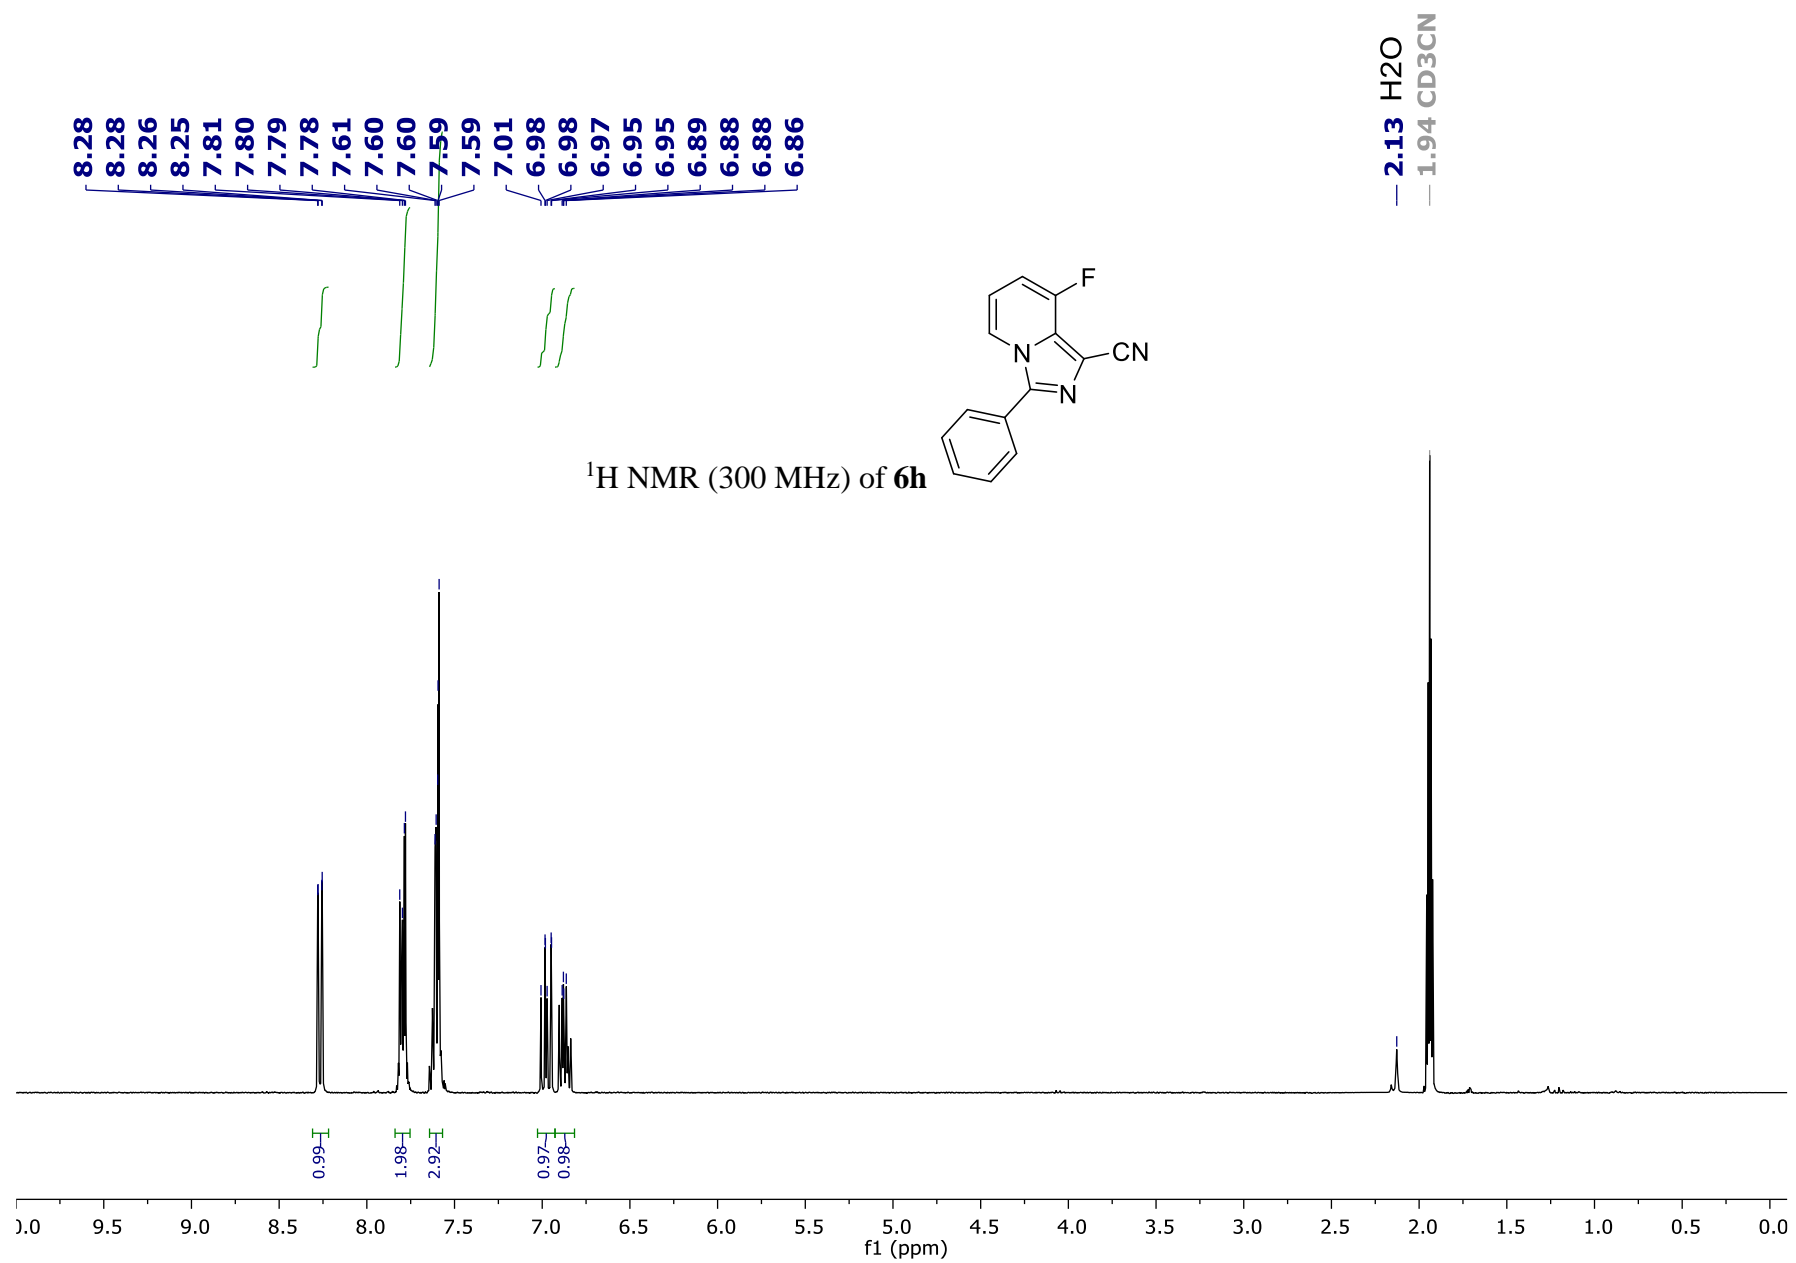

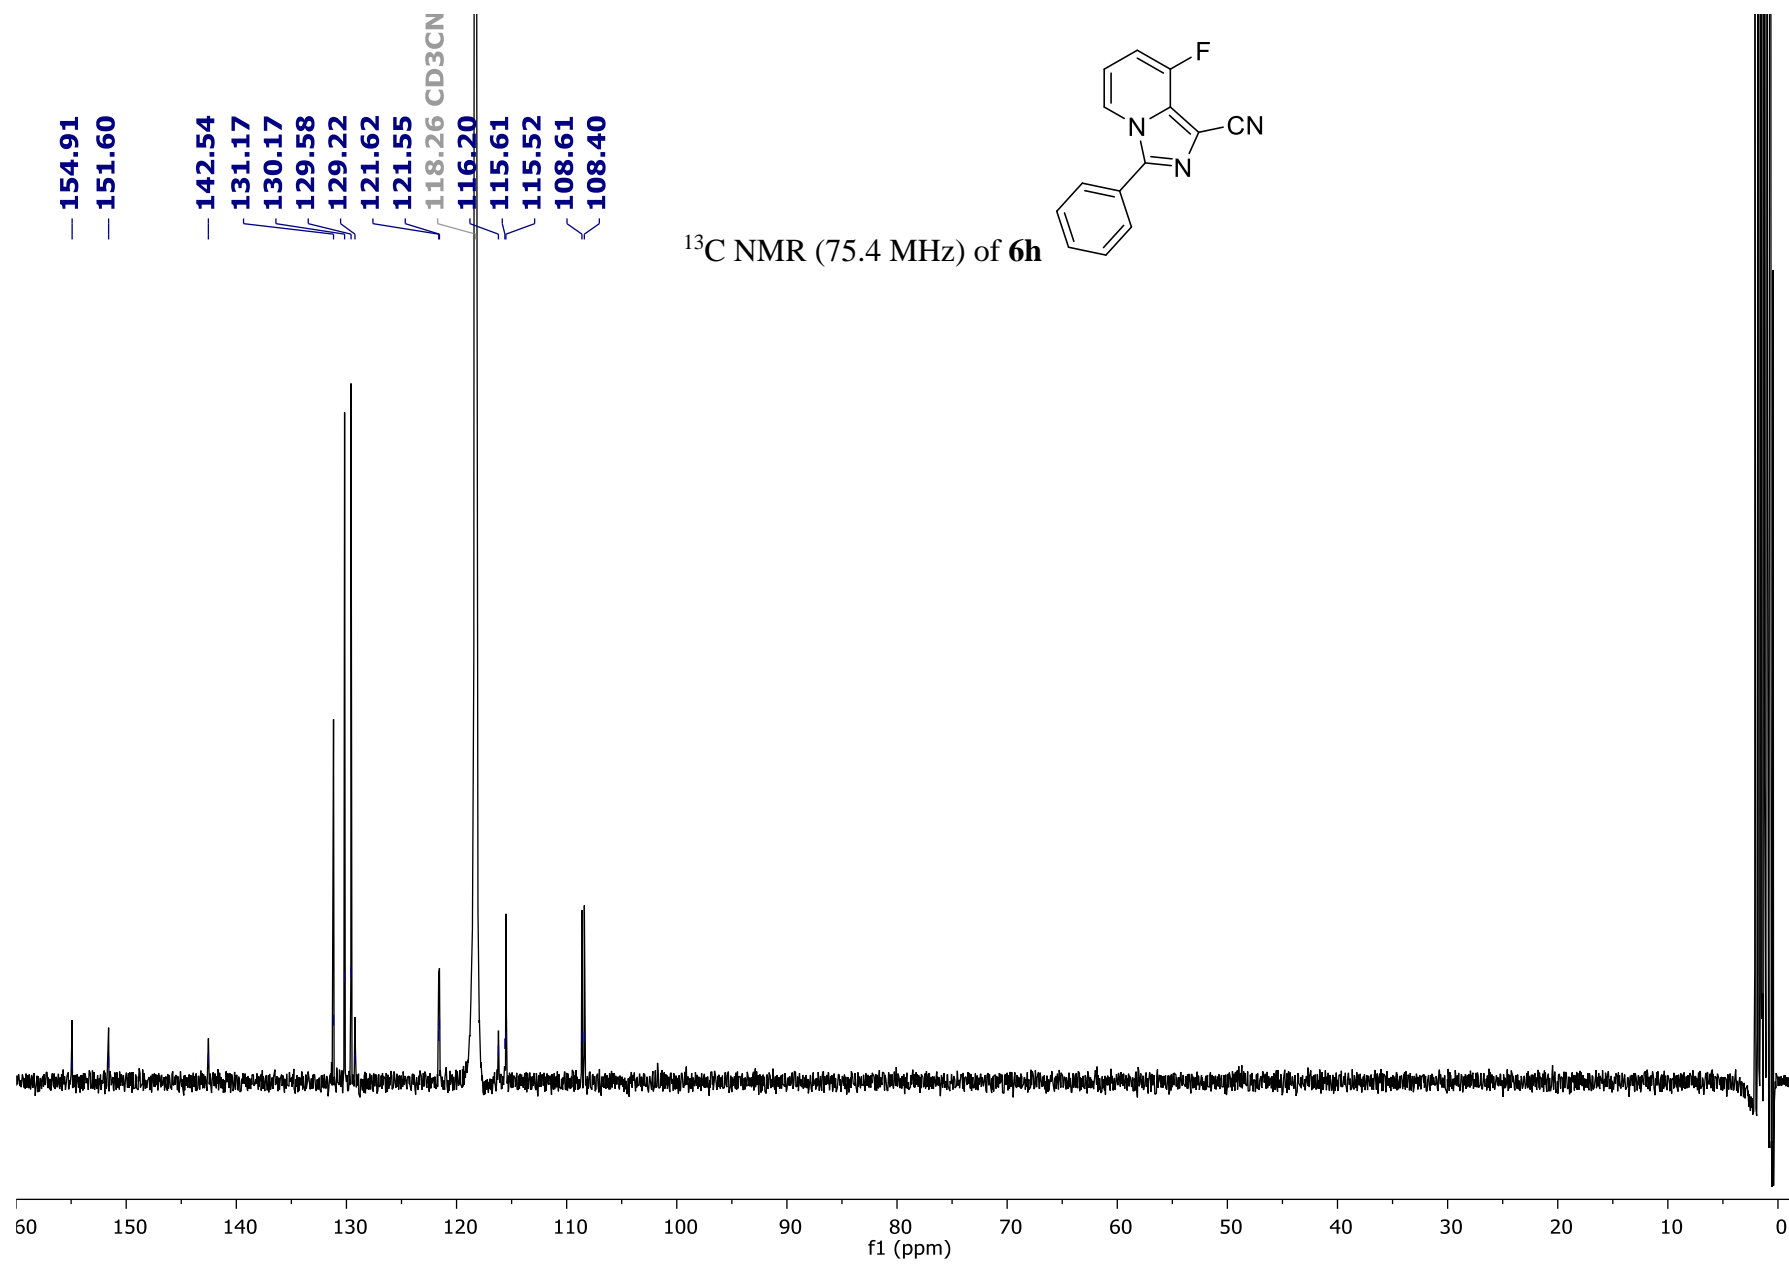

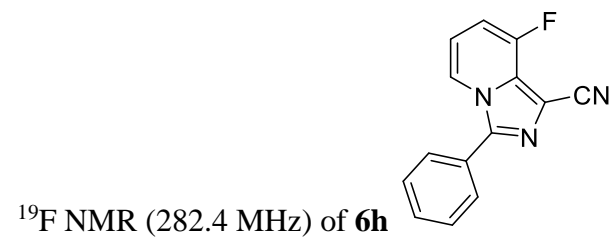

-127.16

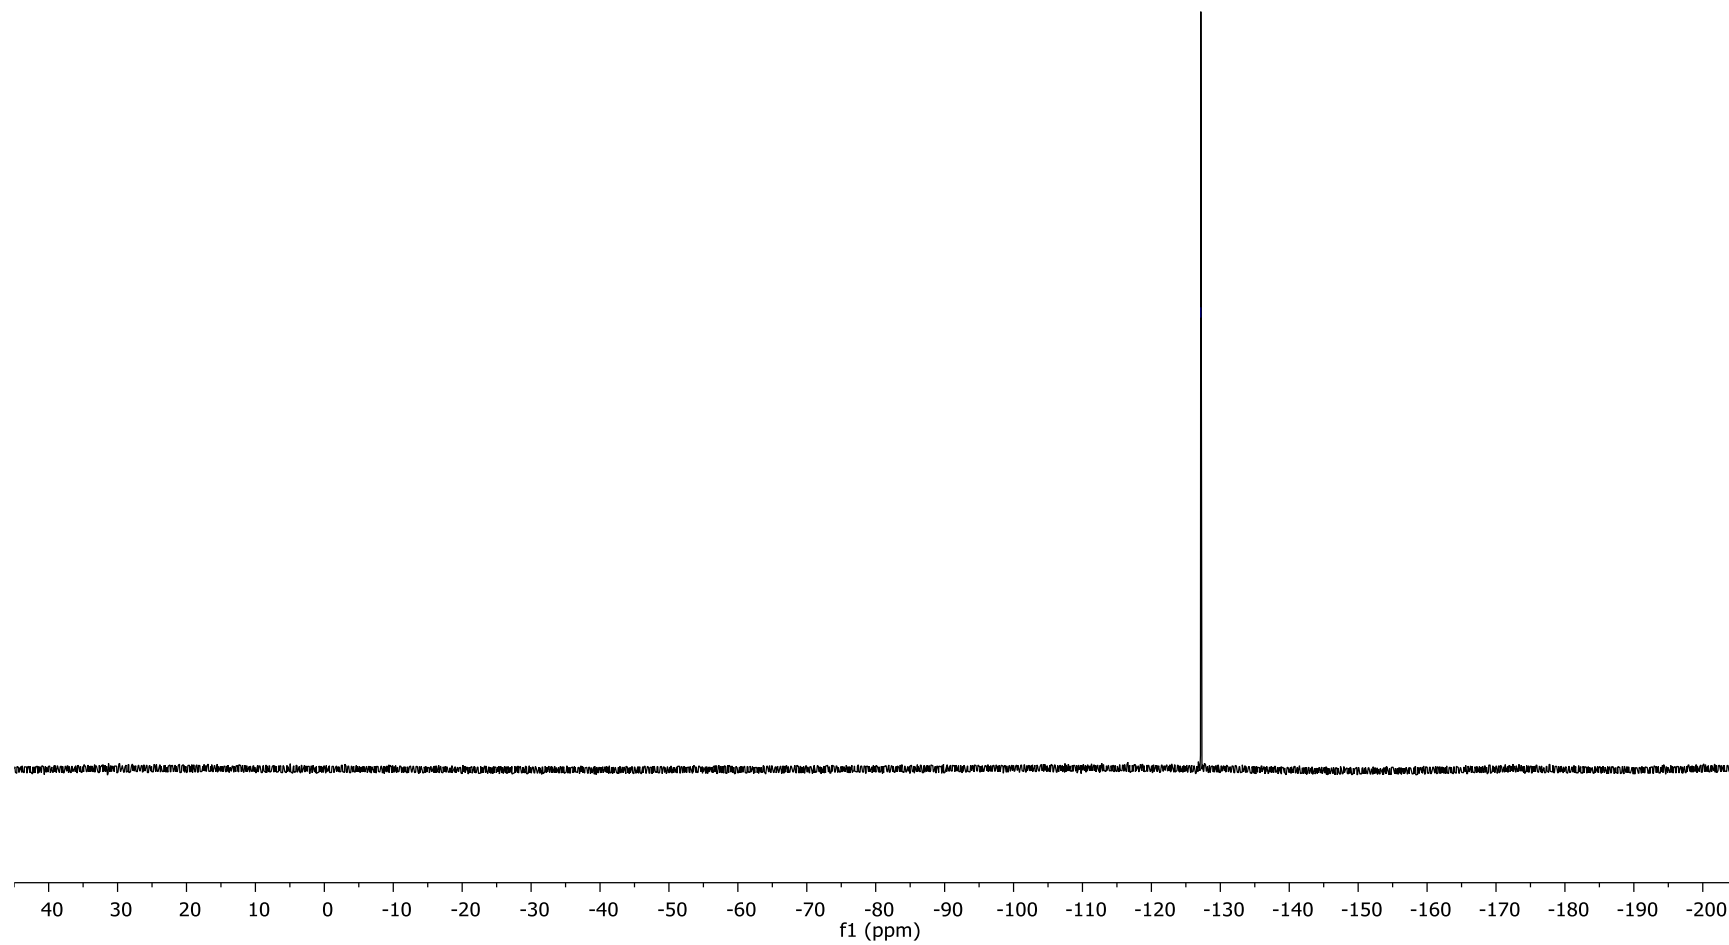



COSY of **6h**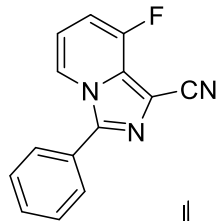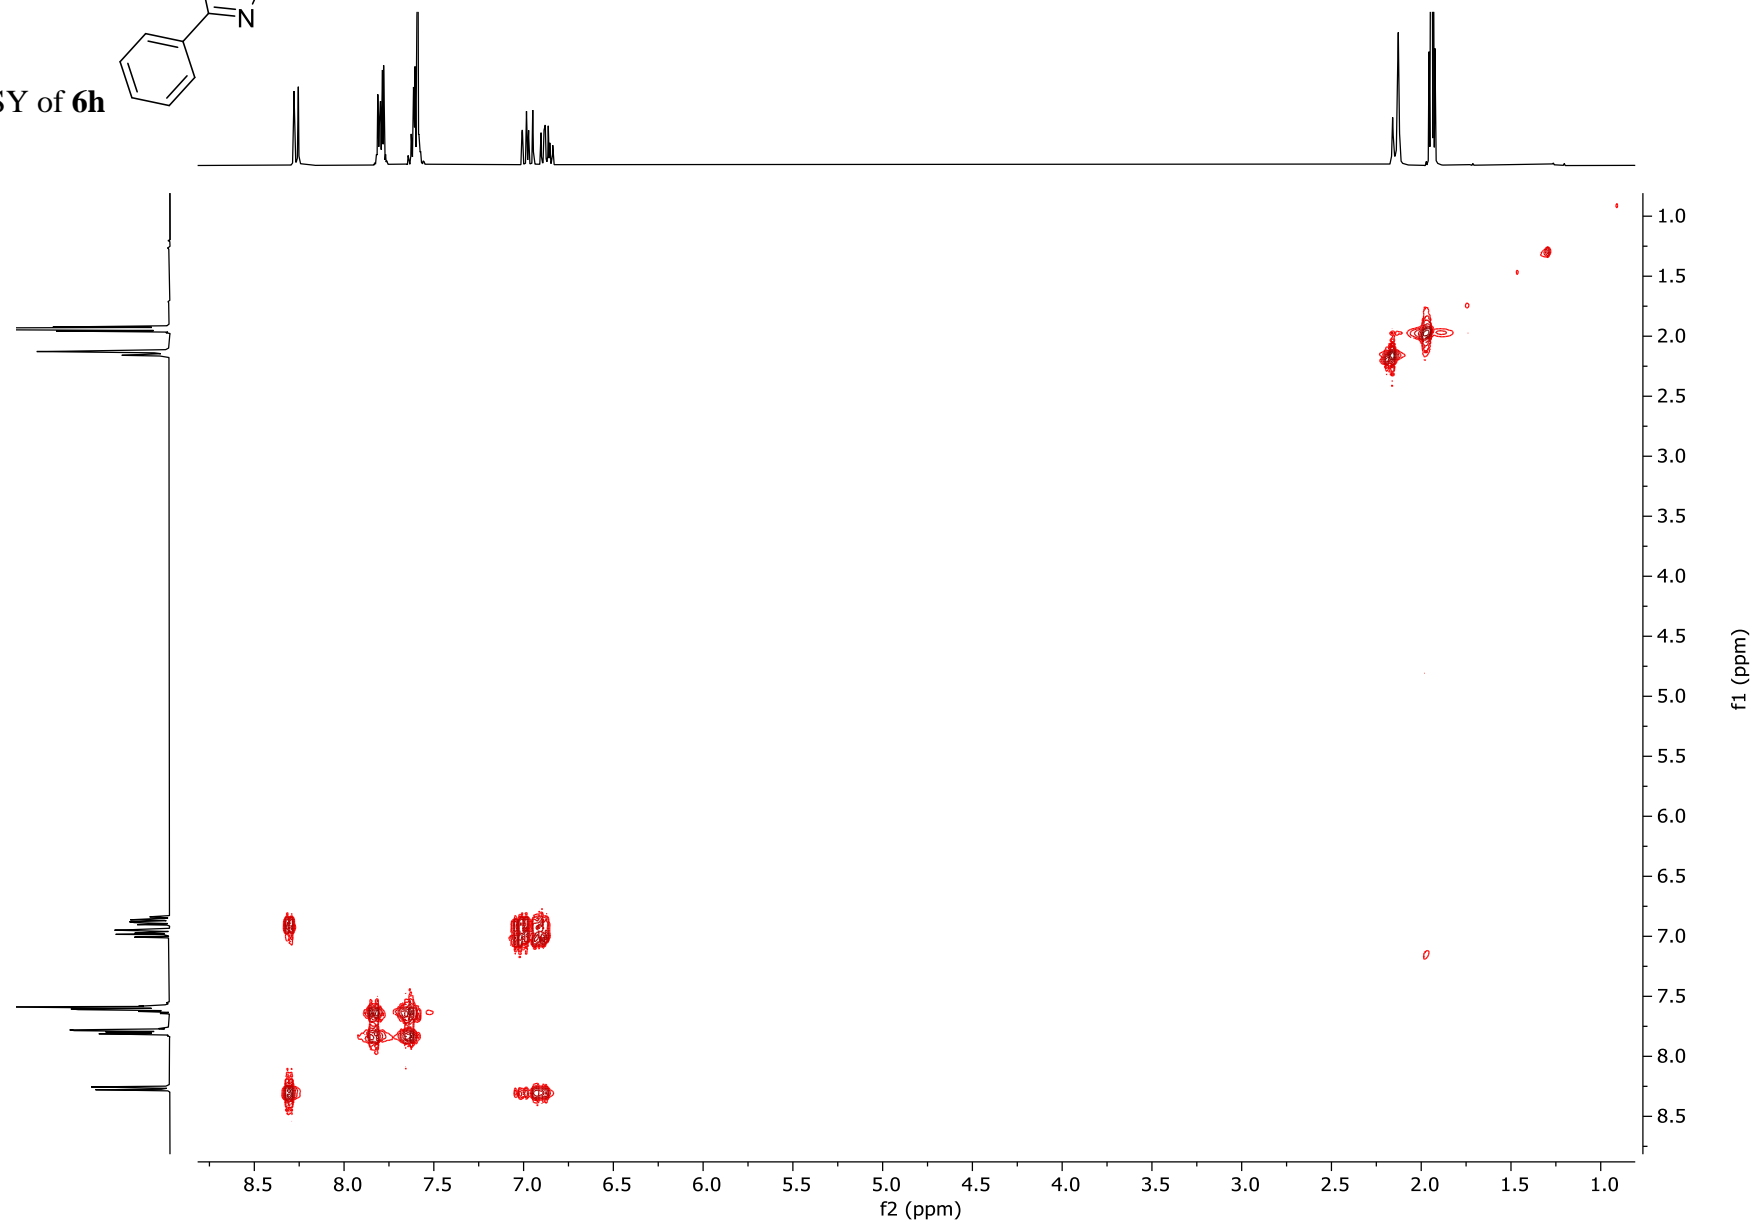

HSQC of **6h**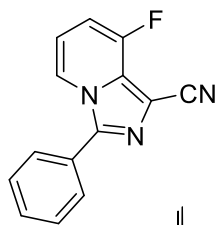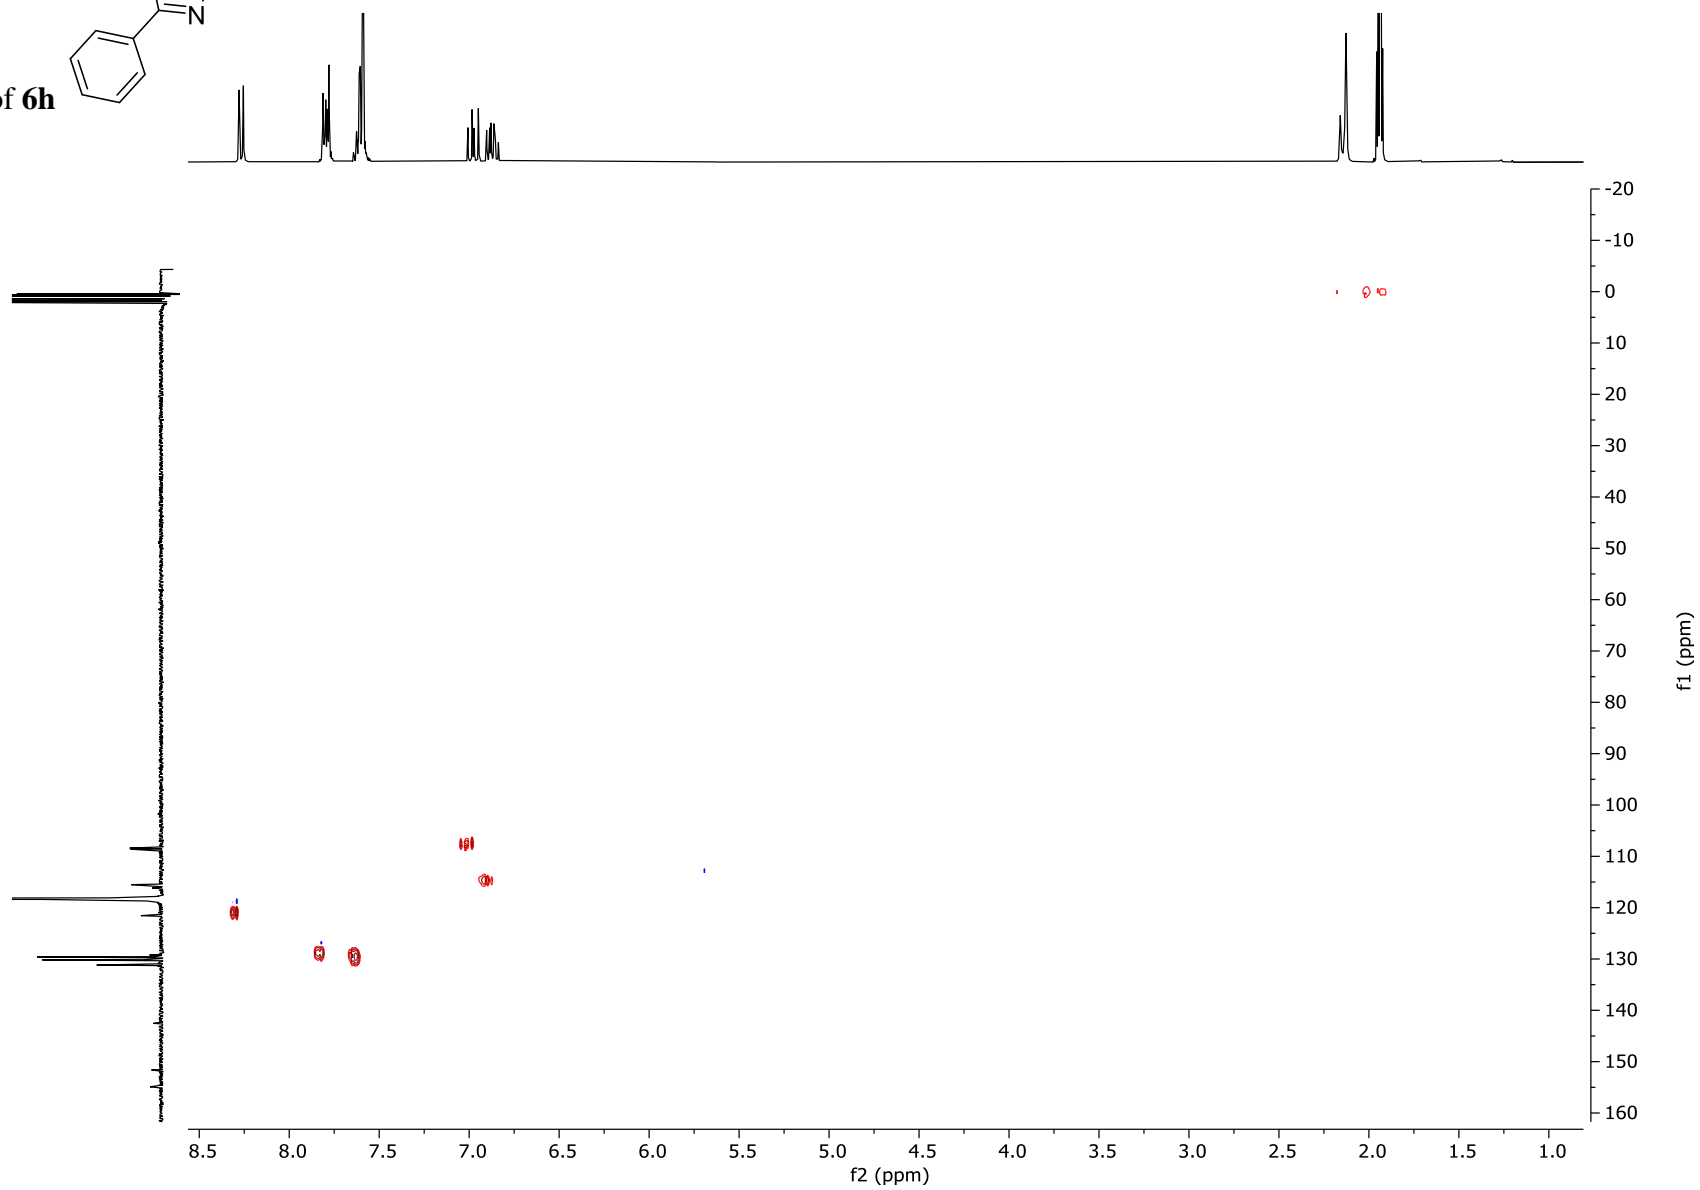

HMBC of **6h**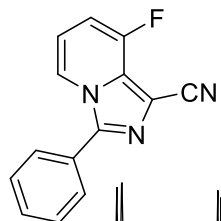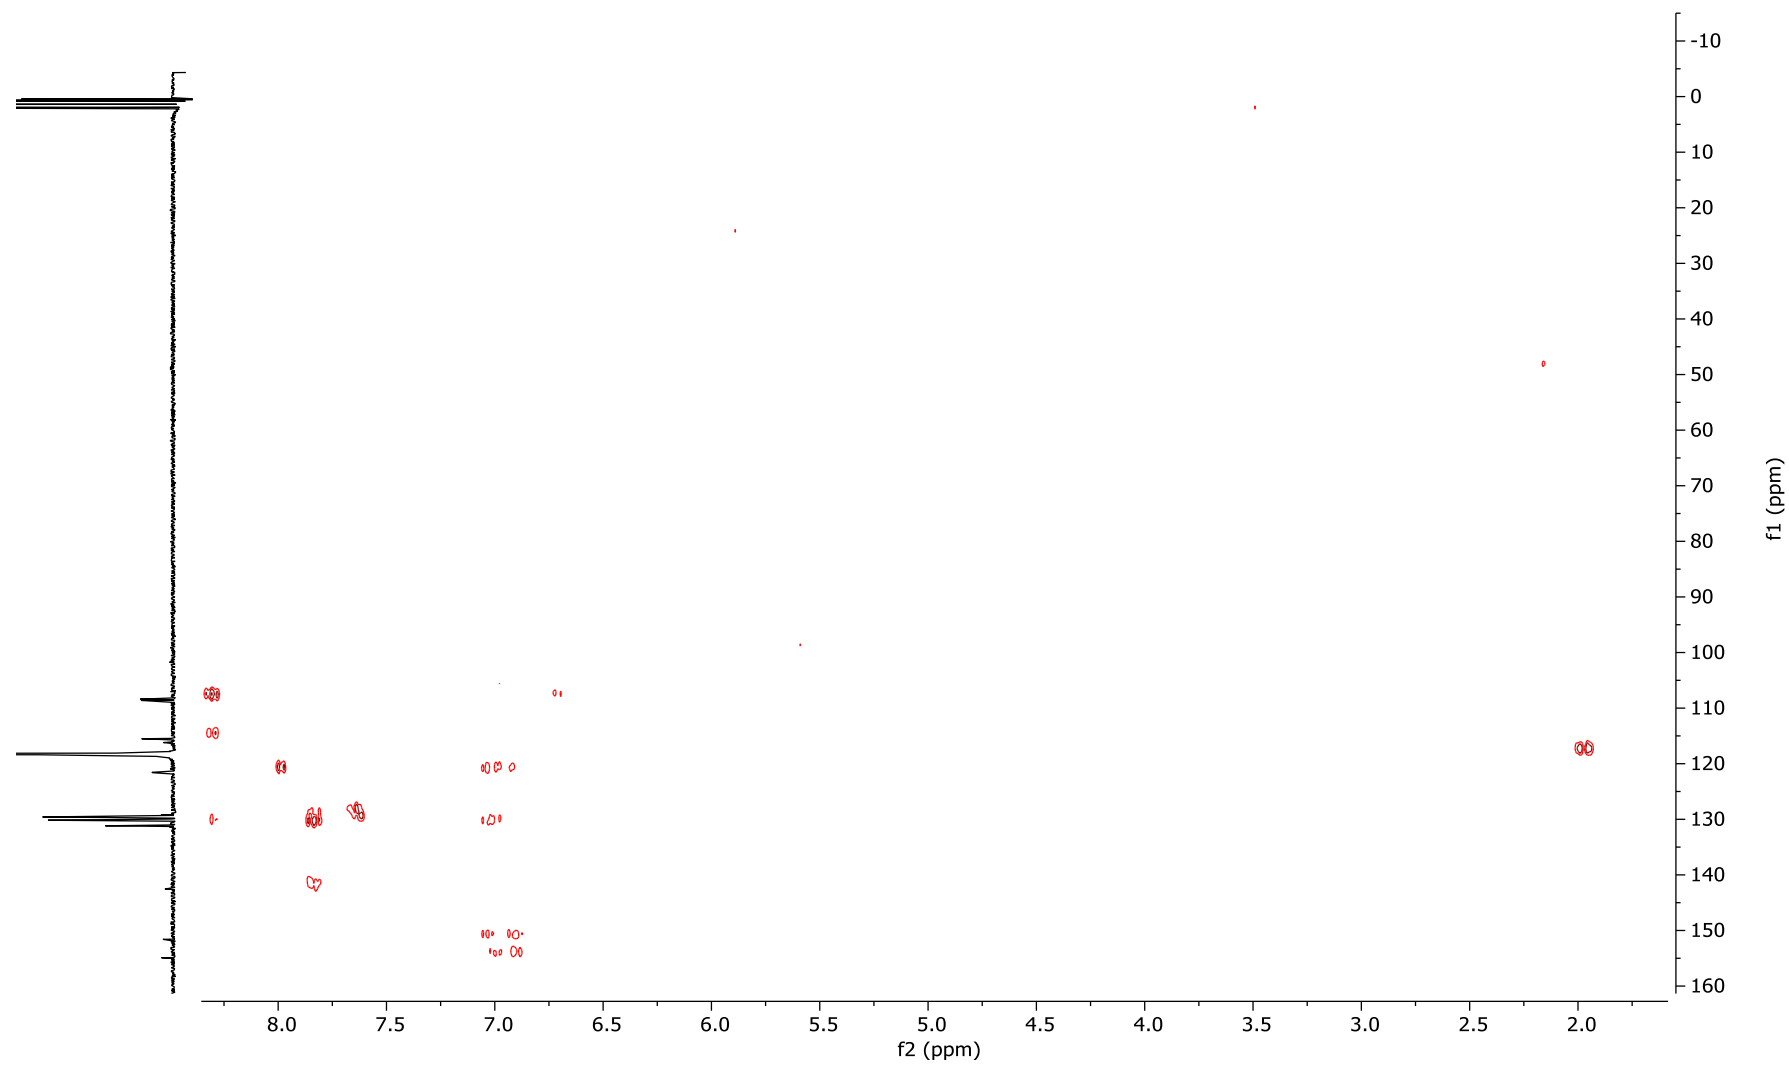

$^1\text{H}$  NMR (300 MHz) of **6i**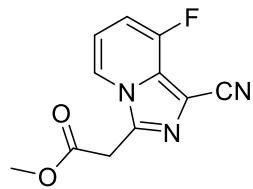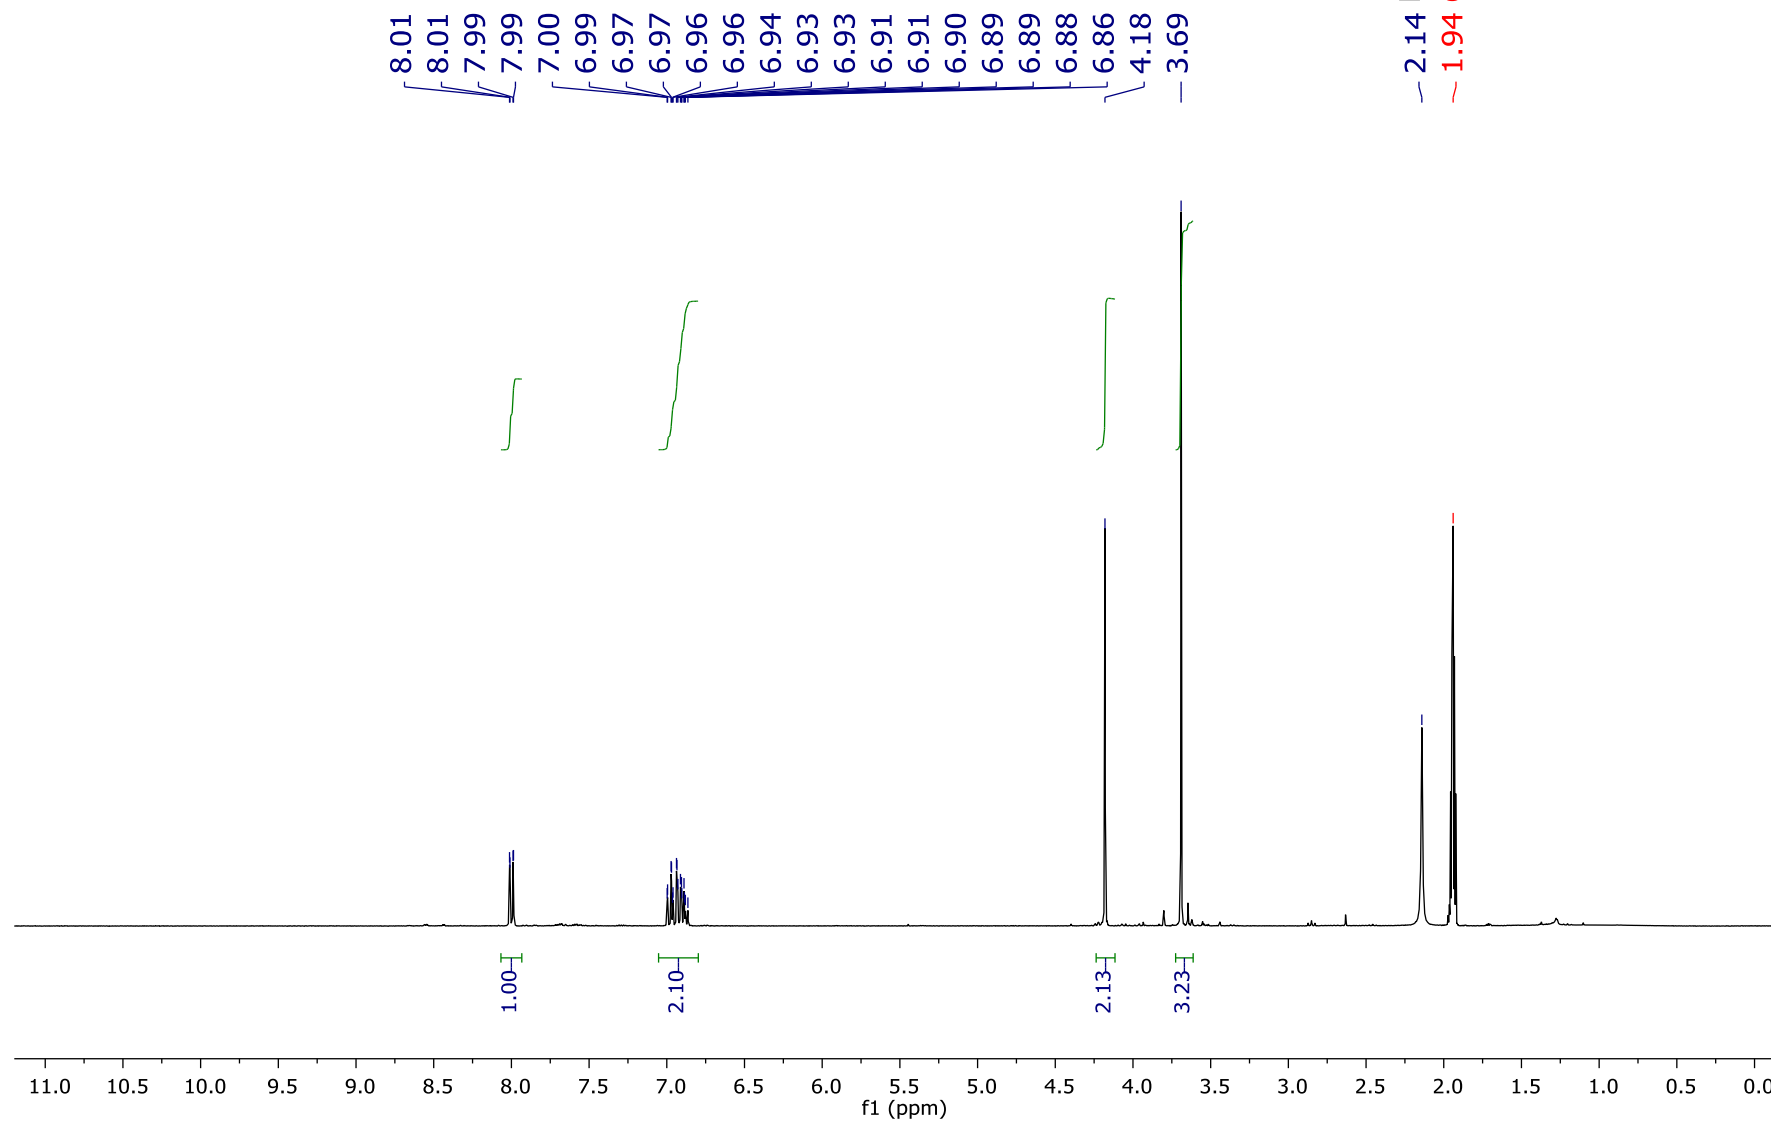

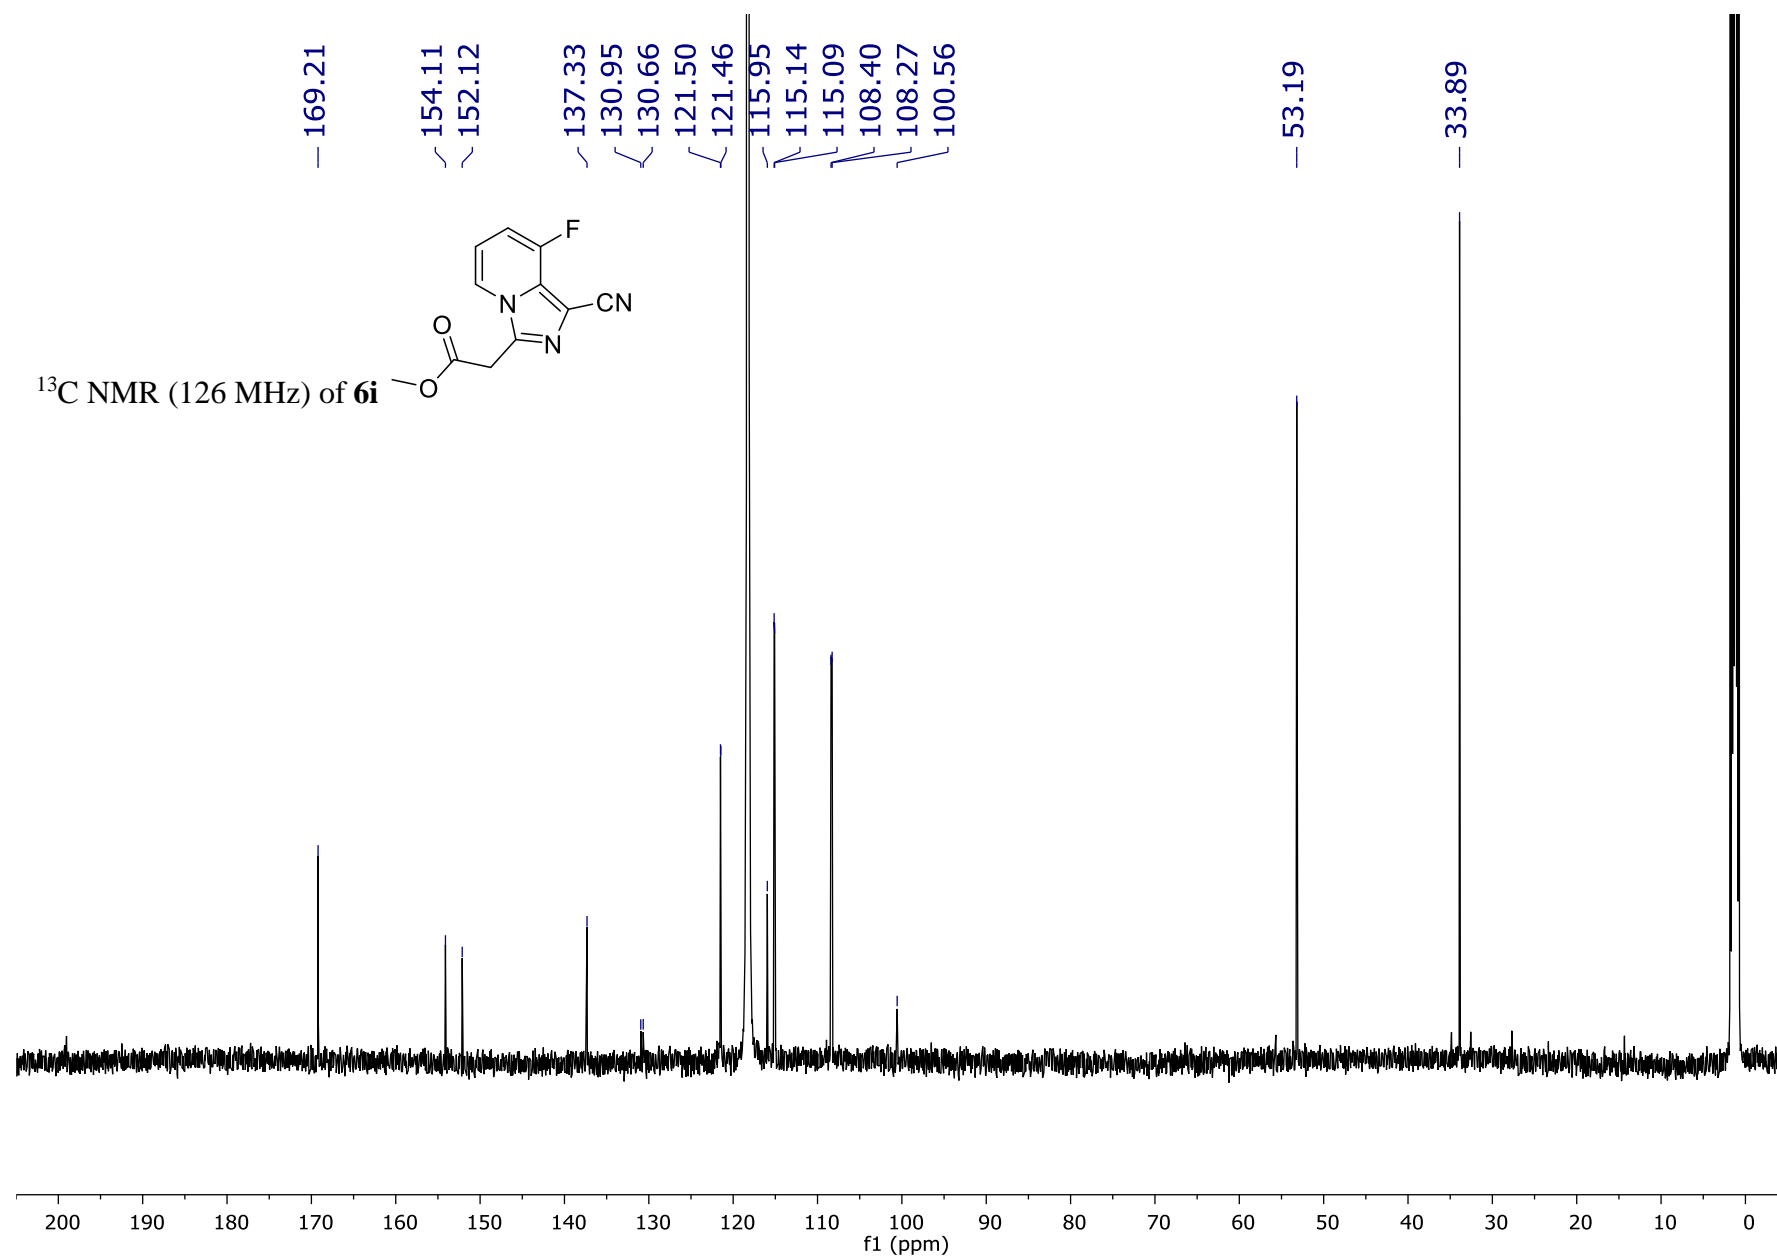

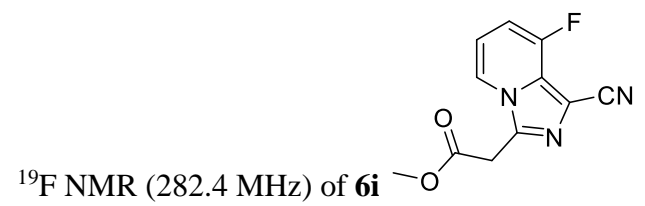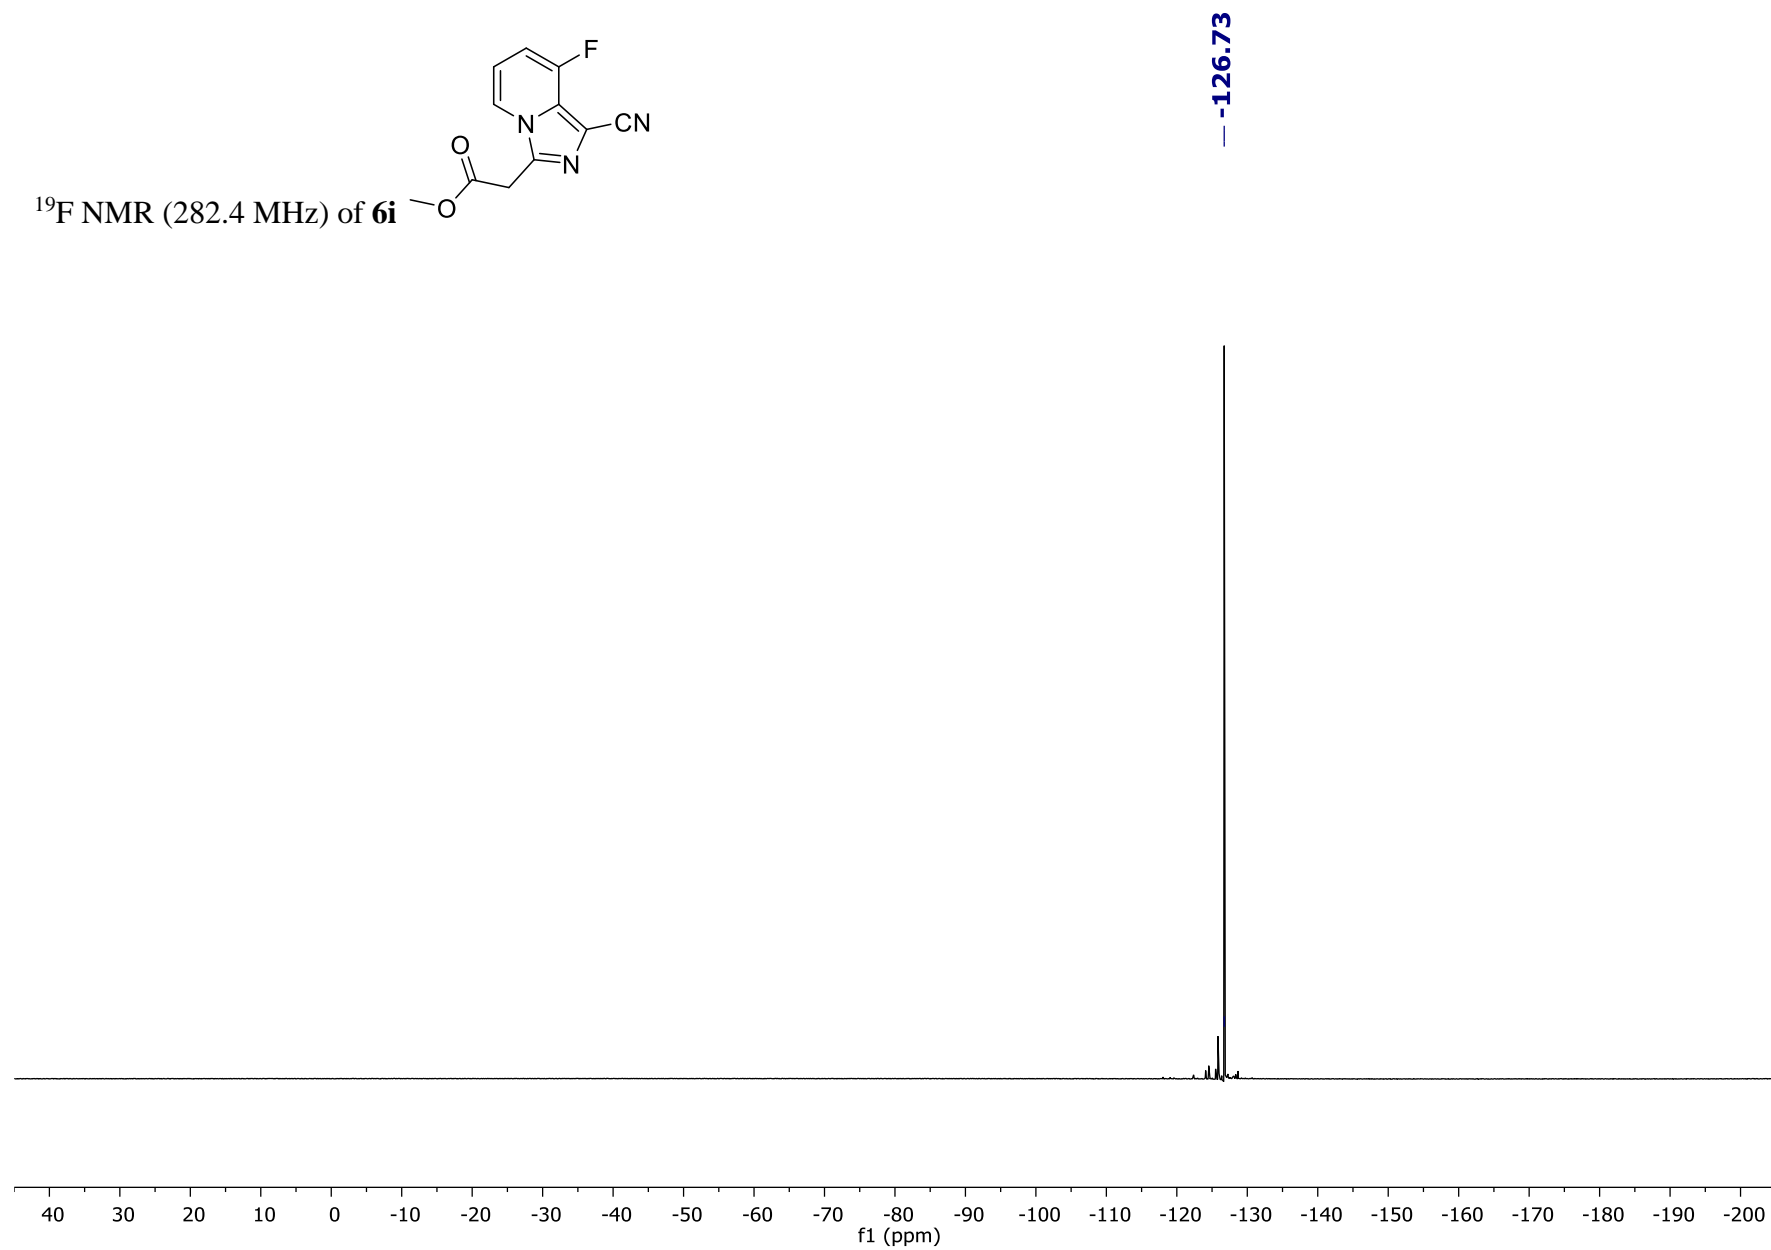

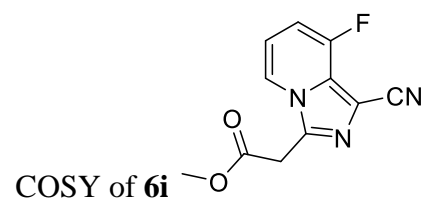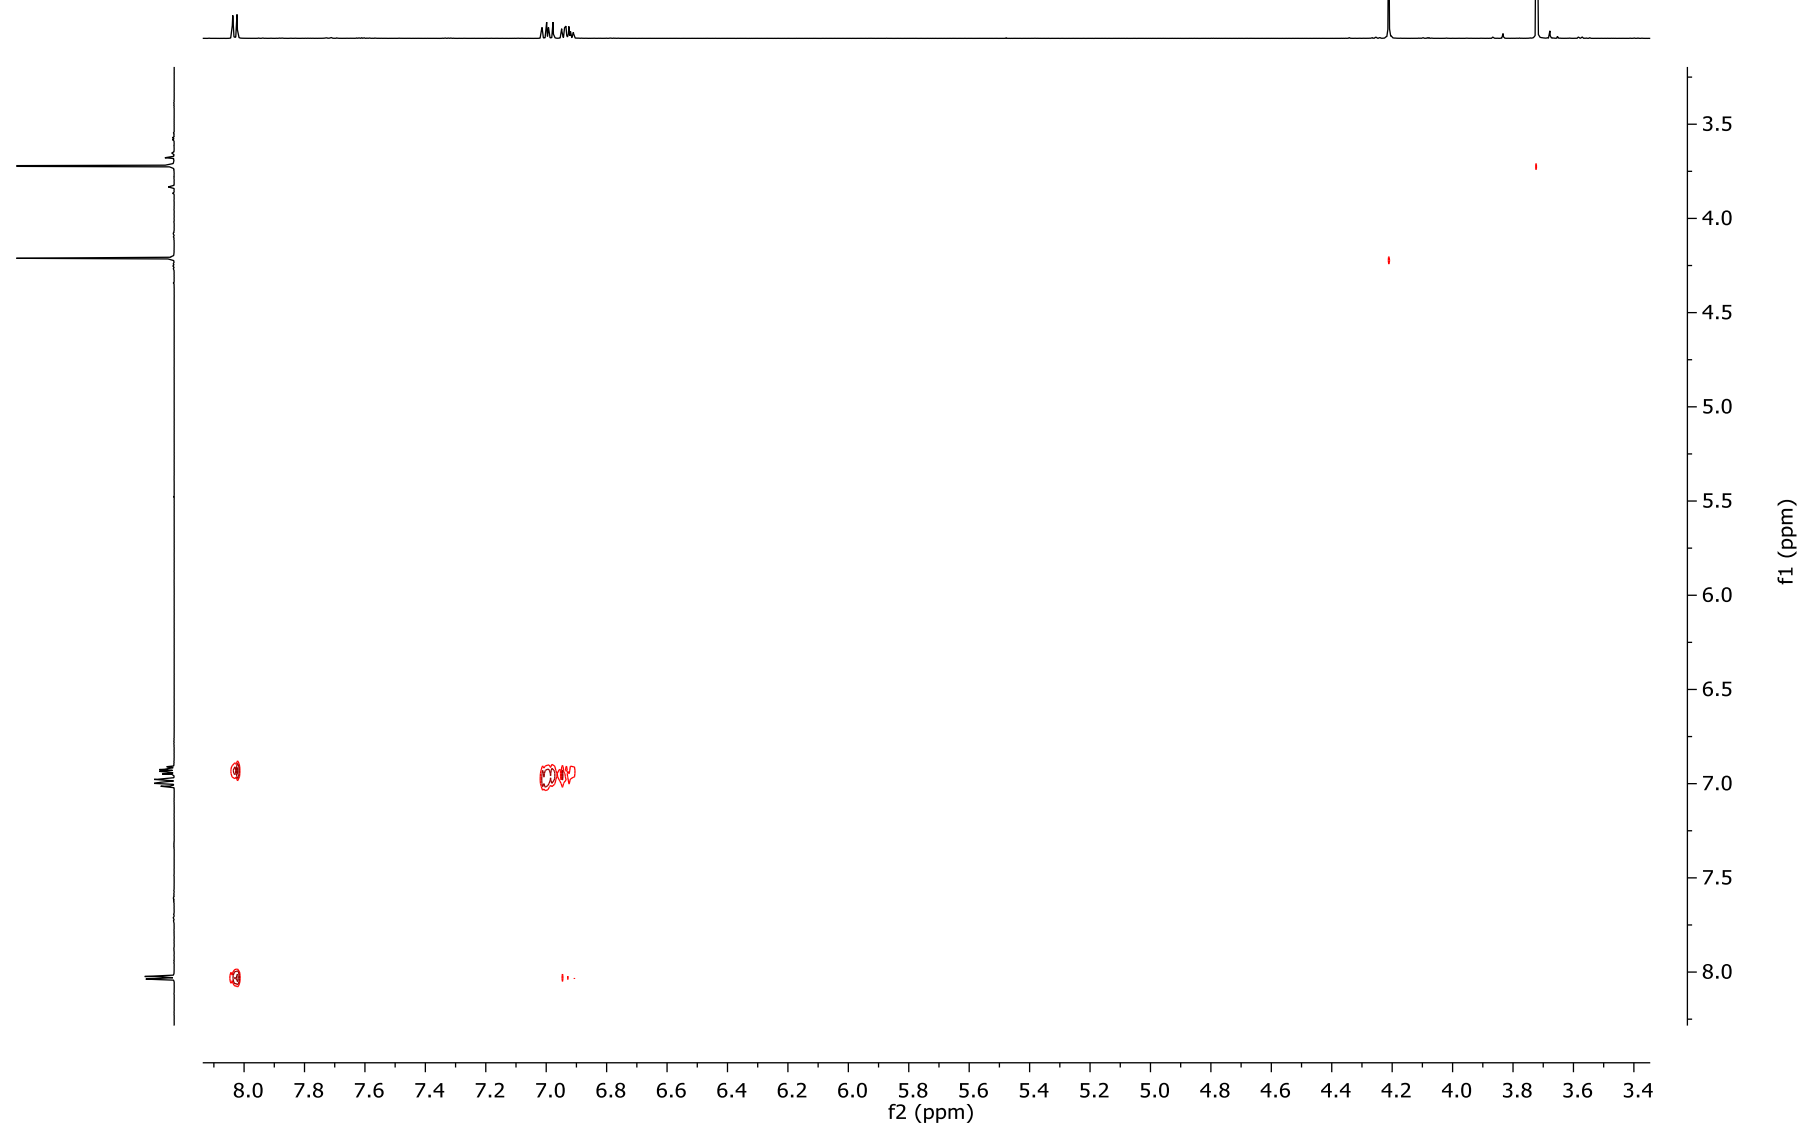

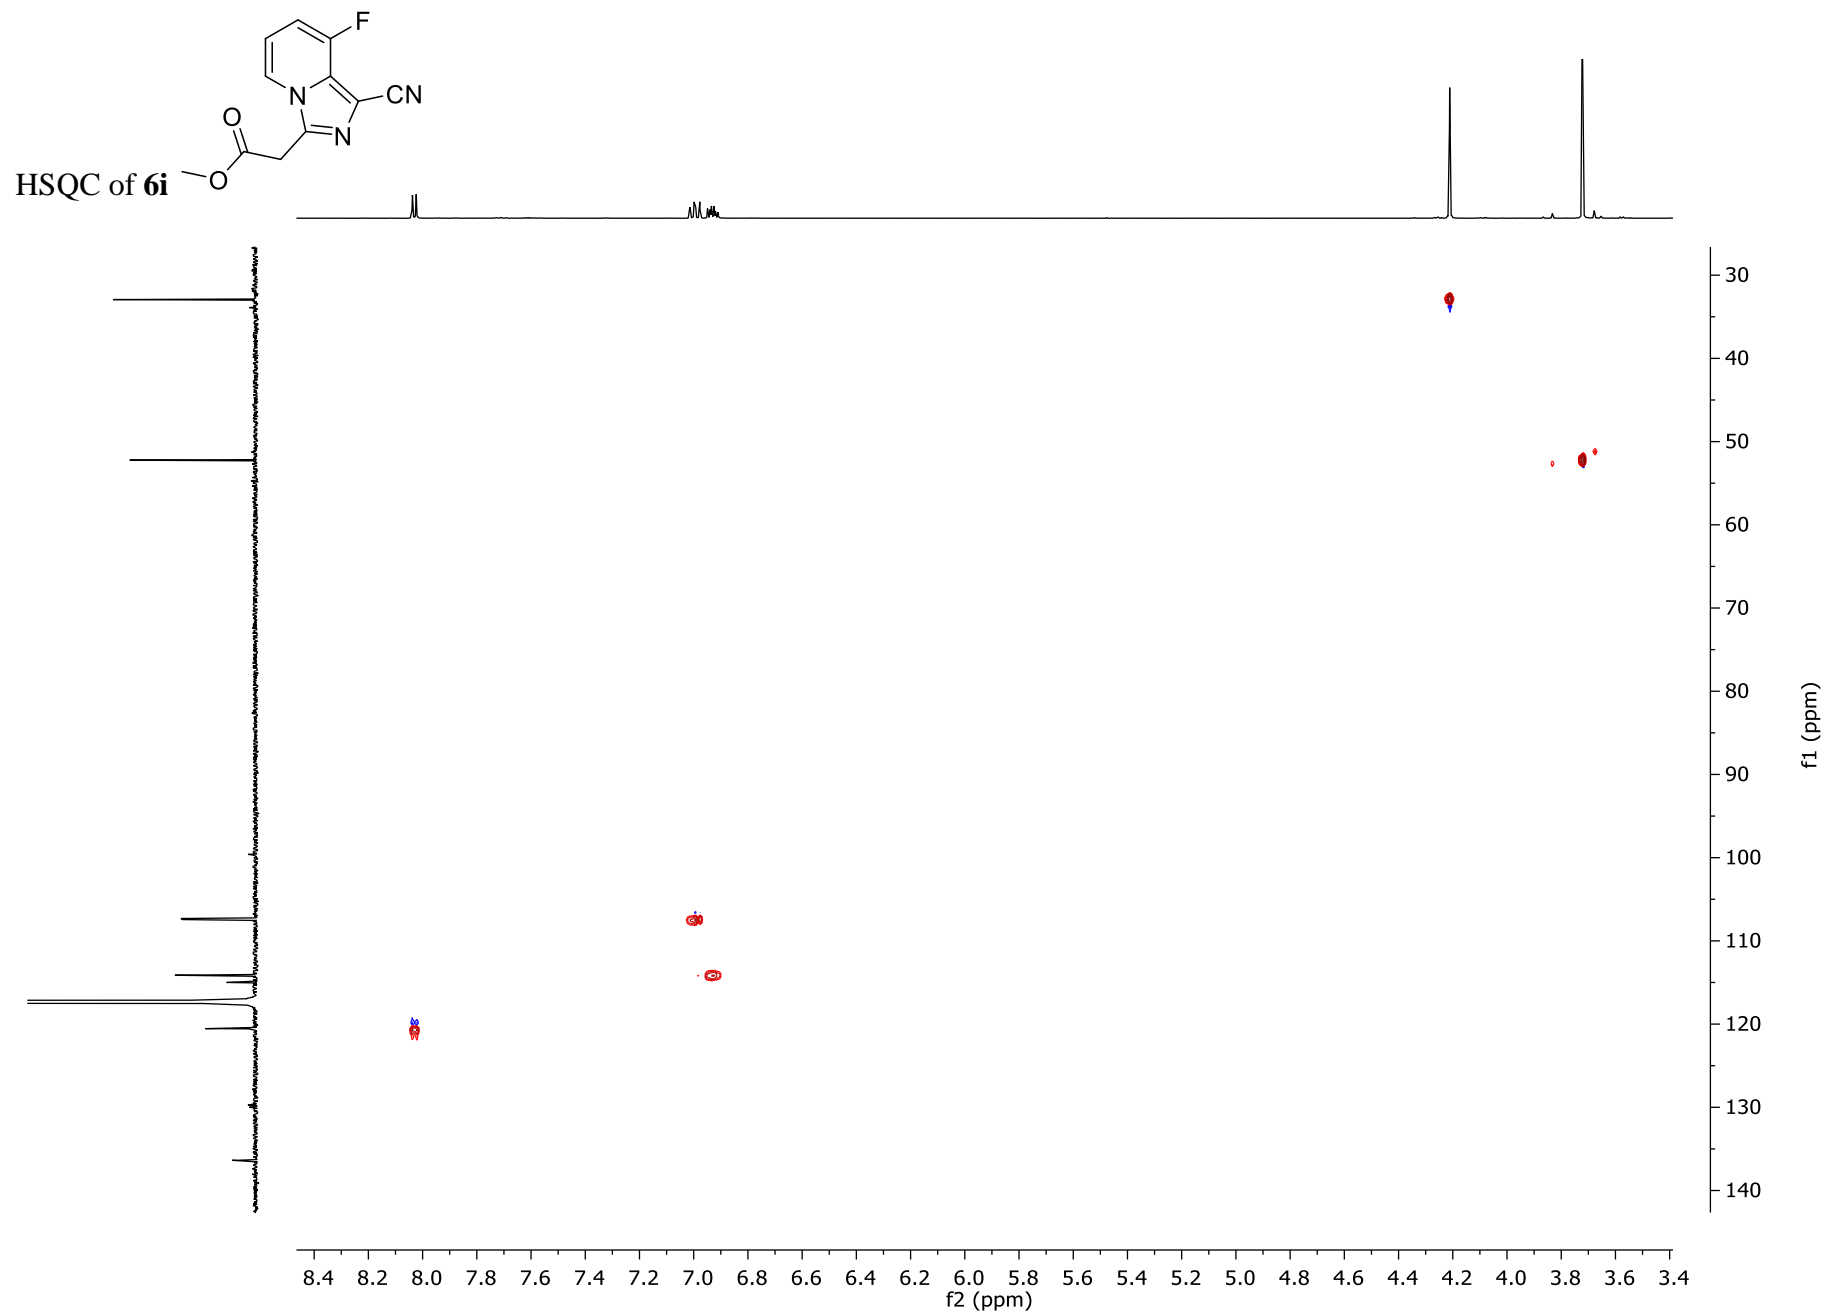



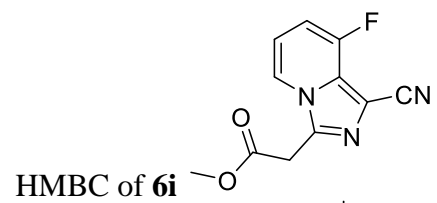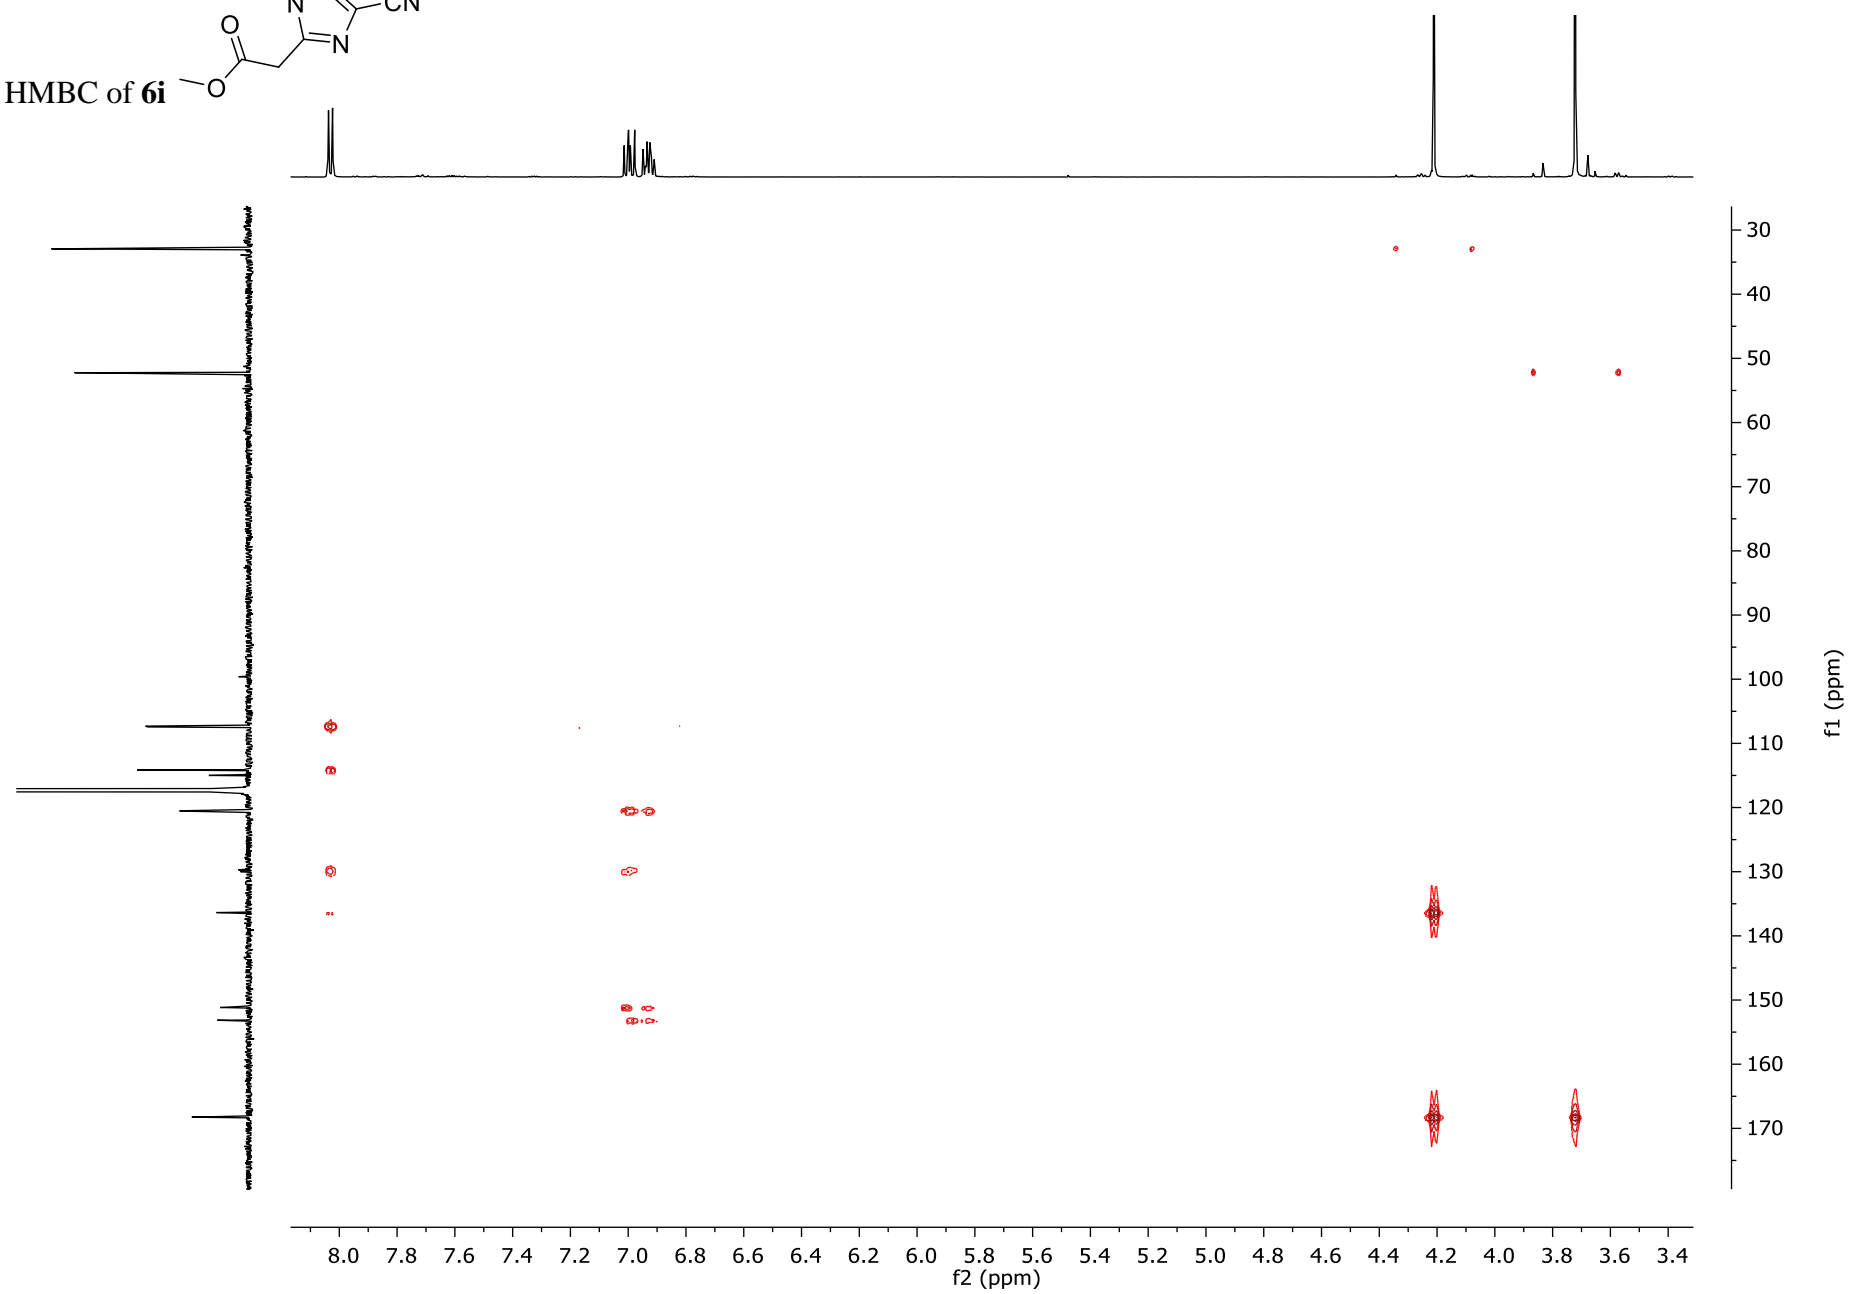

## F. Crystallographic data of CuA, Cu4B, 4 and 6a.

XRD structure of **CuA**:

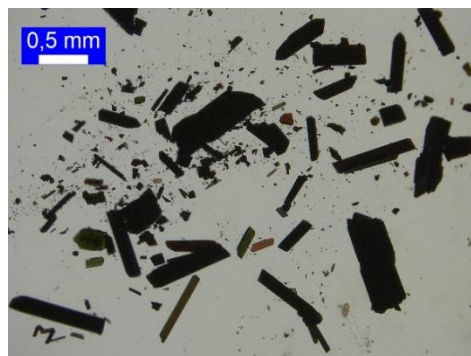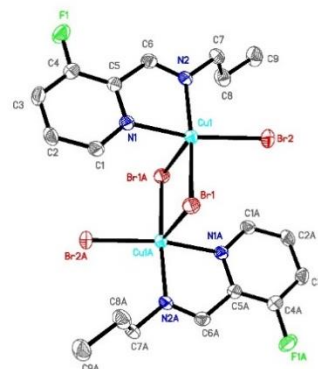

**Table S6. Crystal data and structure refinement for CuA.**

|                                        |                                                                    |                              |
|----------------------------------------|--------------------------------------------------------------------|------------------------------|
| Empirical formula                      | $C_{18}H_{22}Br_4Cu_2F_2N_4$                                       |                              |
| Formula weight                         | 779.11                                                             |                              |
| Temperature                            | 193(2) K                                                           |                              |
| Wavelength                             | 0.71073 Å                                                          |                              |
| Crystal system                         | Triclinic                                                          |                              |
| Space group                            | $P\bar{1}$                                                         |                              |
| Unit cell dimensions                   | $a = 7.8883(6)$ Å                                                  | $\alpha = 71.537(2)^\circ$ . |
|                                        | $b = 8.1714(7)$ Å                                                  | $\beta = 79.335(2)^\circ$ .  |
|                                        | $c = 10.3538(8)$ Å                                                 | $\gamma = 70.634(3)^\circ$ . |
| Volume                                 | $594.83(8)$ Å <sup>3</sup>                                         |                              |
| Z                                      | 1                                                                  |                              |
| Density (calculated)                   | $2.175$ Mg/m <sup>3</sup>                                          |                              |
| Absorption coefficient                 | $8.534$ mm <sup>-1</sup>                                           |                              |
| F(000)                                 | 374                                                                |                              |
| Crystal size                           | $0.250 \times 0.100 \times 0.060$ mm <sup>3</sup>                  |                              |
| Theta range for data collection        | $3.269$ to $27.484^\circ$ .                                        |                              |
| Index ranges                           | $-10 \leq h \leq 10$ , $-10 \leq k \leq 10$ , $-13 \leq l \leq 11$ |                              |
| Reflections collected                  | 16362                                                              |                              |
| Independent reflections                | 2720 [R(int) = 0.0347]                                             |                              |
| Completeness to theta = $25.242^\circ$ | 99.5 %                                                             |                              |
| Absorption correction                  | Semi-empirical from equivalents                                    |                              |
| Max. and min. transmission             | 0.7457 and 0.4616                                                  |                              |
| Refinement method                      | Full-matrix least-squares on F <sup>2</sup>                        |                              |
| Data / restraints / parameters         | 2720 / 0 / 137                                                     |                              |
| Goodness-of-fit on F <sup>2</sup>      | 1.068                                                              |                              |
| Final R indices [I > 2sigma(I)]        | R1 = 0.0209, wR2 = 0.0451                                          |                              |
| R indices (all data)                   | R1 = 0.0288, wR2 = 0.0473                                          |                              |
| Largest diff. peak and hole            | 0.357 and -0.394 e.Å <sup>-3</sup>                                 |                              |

XRD structure of **Cu4B**: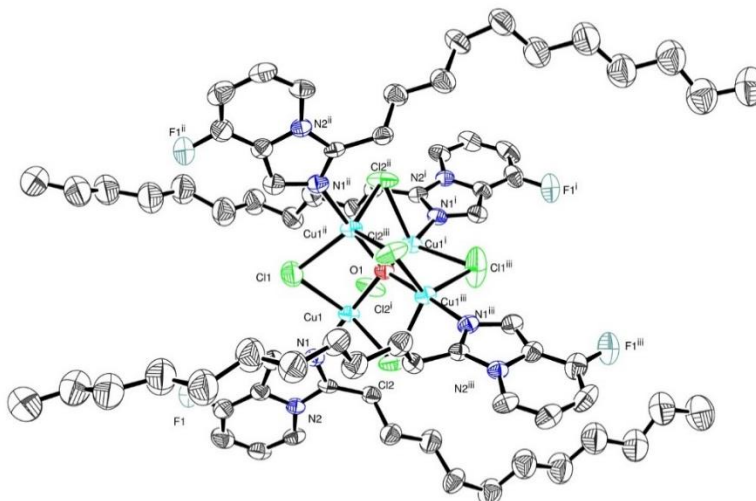

Molecule [Symmetry codes : (i)  $0.5-y, -0.5+x, 0.5-z$  ; (ii)  $1-x, y, z$  ; (iii)  $0.5+y, 0.5-x, 0.5-z$ ]

**Table S7. Crystal data and structure refinement for Cu4B.**

|                                   |                                                                 |                                                               |
|-----------------------------------|-----------------------------------------------------------------|---------------------------------------------------------------|
| Empirical formula                 | $C_{72}H_{108}Cl_6Cu_4F_4N_8O_1$                                |                                                               |
| Formula weight                    | 1644.56                                                         |                                                               |
| Temperature                       | 193(2) K                                                        |                                                               |
| Wavelength                        | 0.71073 Å                                                       |                                                               |
| Crystal system, space group       | tetragonal, I -4                                                |                                                               |
| Unit cell dimensions              | $a = 11.5858(4)$ Å<br>$b = 11.5858(4)$ Å<br>$c = 29.2335(13)$ Å | $\alpha = 90$ deg.<br>$\beta = 90$ deg.<br>$\gamma = 90$ deg. |
| Volume                            | $3924.0(3)$ Å <sup>3</sup>                                      |                                                               |
| Z, Calculated density             | 2, 1.392 Mg/m <sup>3</sup>                                      |                                                               |
| Absorption coefficient            | 1.329 mm <sup>-1</sup>                                          |                                                               |
| F(000)                            | 1716                                                            |                                                               |
| Crystal size                      | 0.16 x 0.10 x 0.08 mm                                           |                                                               |
| Theta range for data collection   | 1.39 to 26.40 deg.                                              |                                                               |
| Limiting indices                  | $-14 \leq h \leq 14, -11 \leq k \leq 14, -36 \leq l \leq 34$    |                                                               |
| Reflections collected / unique    | 15162 / 4023 [R(int) = 0.0503]                                  |                                                               |
| Completeness to theta = 26.40     | 99.4 %                                                          |                                                               |
| Max. and min. transmission        | 0.7454 and 0.6526                                               |                                                               |
| Refinement method                 | Full-matrix least-squares on F <sup>2</sup>                     |                                                               |
| Data / restraints / parameters    | 4023 / 386 / 316                                                |                                                               |
| Goodness-of-fit on F <sup>2</sup> | 1.040                                                           |                                                               |
| Final R indices [I > 2σ(I)]       | R1 = 0.0452, wR2 = 0.1045                                       |                                                               |
| R indices (all data)              | R1 = 0.0673, wR2 = 0.1152                                       |                                                               |
| Absolute structure parameter      | -0.024(9)                                                       |                                                               |
| Largest diff. peak and hole       | 0.584 and -0.595 e.Å <sup>-3</sup>                              |                                                               |

XRD structure of **4**:

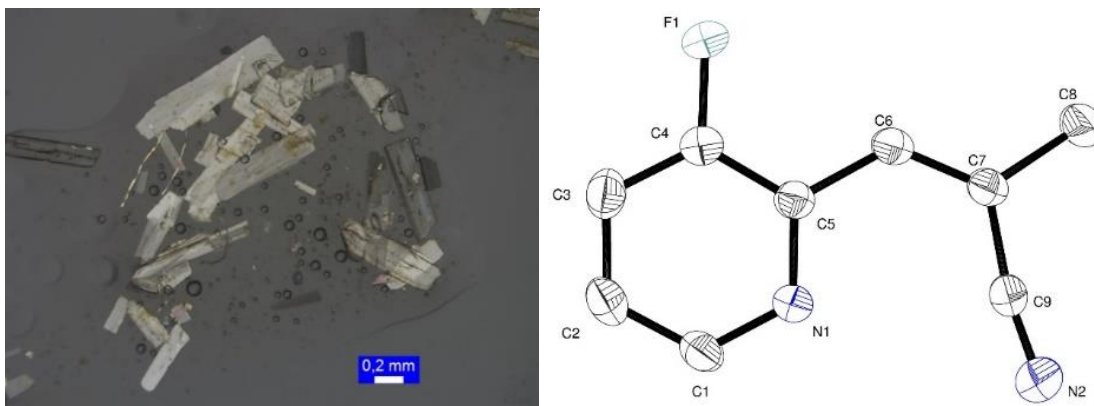

**Table S8. Crystal data and structure refinement for 4.**

|                                   |                                                            |                           |
|-----------------------------------|------------------------------------------------------------|---------------------------|
| Empirical formula                 | $C_9H_7FN_2$                                               |                           |
| Formula weight                    | 162.17                                                     |                           |
| Temperature                       | 193(2) K                                                   |                           |
| Wavelength                        | 0.71073 Å                                                  |                           |
| Crystal system, space group       | Monoclinic, $P 2_1/c$                                      |                           |
| Unit cell dimensions              | $a = 9.9462(8)$ Å                                          | $\alpha = 90$ deg.        |
|                                   | $b = 11.8055(9)$ Å                                         | $\beta = 109.811(5)$ deg. |
|                                   | $c = 7.1741(7)$ Å                                          | $\gamma = 90$ deg.        |
| Volume                            | $792.53(12)$ Å <sup>3</sup>                                |                           |
| Z, Calculated density             | 4, 1.359 Mg/m <sup>3</sup>                                 |                           |
| Absorption coefficient            | $0.100$ mm <sup>-1</sup>                                   |                           |
| F(000)                            | 336                                                        |                           |
| Crystal size                      | 0.200 x 0.080 x 0.060 mm                                   |                           |
| Theta range for data collection   | 2.778 to 25.345 deg.                                       |                           |
| Limiting indices                  | $-11 \leq h \leq 11, -14 \leq k \leq 14, -8 \leq l \leq 8$ |                           |
| Reflections collected / unique    | 17537 / 1444 [R(int) = 0.0588]                             |                           |
| Completeness to theta = 25.242    | 99.2 %                                                     |                           |
| Max. and min. transmission        | 0.7465 and 0.6711                                          |                           |
| Refinement method                 | Full-matrix least-squares on F <sup>2</sup>                |                           |
| Data / restraints / parameters    | 1444 / 0 / 110                                             |                           |
| Goodness-of-fit on F <sup>2</sup> | 1.175                                                      |                           |
| Final R indices [I > 2σ(I)]       | R1 = 0.0771, wR2 = 0.2489                                  |                           |
| R indices (all data)              | R1 = 0.0835, wR2 = 0.2555                                  |                           |
| Largest diff. peak and hole       | 0.399 and -0.345 e.Å <sup>-3</sup>                         |                           |

XRD structure of **6a**: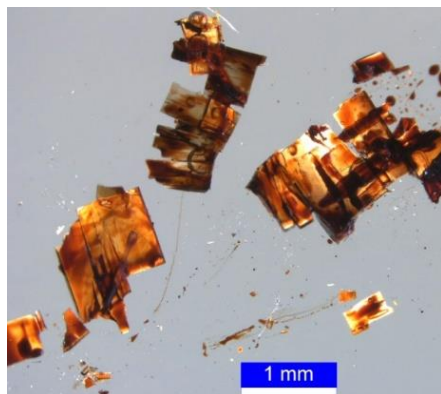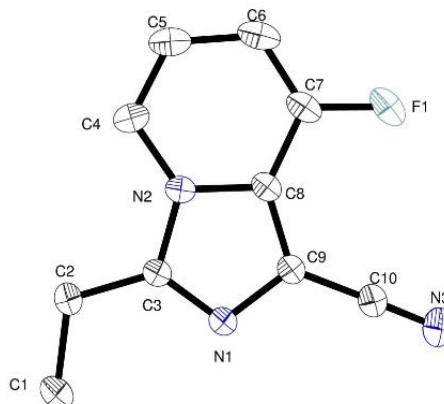**Table S9. Crystal data and structure refinement for 6a.**

|                                   |                                                                    |                    |
|-----------------------------------|--------------------------------------------------------------------|--------------------|
| Empirical formula                 | $C_{10}H_8FN_3$                                                    |                    |
| Formula weight                    | 189.19                                                             |                    |
| Temperature                       | 193(2) K                                                           |                    |
| Wavelength                        | 0.71073 Å                                                          |                    |
| Crystal system, space group       | Orthorhombic, $I b a m$                                            |                    |
| Unit cell dimensions              | $a = 15.8734(6)$ Å                                                 | $\alpha = 90$ deg. |
|                                   | $b = 17.3509(7)$ Å                                                 | $\beta = 90$ deg.  |
|                                   | $c = 6.6216(3)$ Å                                                  | $\gamma = 90$ deg. |
| Volume                            | $1823.71(13)$ Å <sup>3</sup>                                       |                    |
| Z, Calculated density             | 8, 1.378 Mg/m <sup>3</sup>                                         |                    |
| Absorption coefficient            | $0.101$ mm <sup>-1</sup>                                           |                    |
| F(000)                            | 784                                                                |                    |
| Crystal size                      | 0.200 x 0.100 x 0.080 mm                                           |                    |
| Theta range for data collection   | 4.026 to 34.987 deg.                                               |                    |
| Limiting indices                  | $-25 \leq h \leq 21$ , $-27 \leq k \leq 27$ , $-10 \leq l \leq 10$ |                    |
| Reflections collected / unique    | 32011 / 2099 [R(int) = 0.0337]                                     |                    |
| Completeness to theta =           | 25.242 97.4 %                                                      |                    |
| Refinement method                 | Full-matrix least-squares on F <sup>2</sup>                        |                    |
| Max. and min. transmission        | 0.7469 and 0.7010                                                  |                    |
| Data / restraints / parameters    | 2099 / 0 / 92                                                      |                    |
| Goodness-of-fit on F <sup>2</sup> | 1.083                                                              |                    |
| Final R indices [I > 2σ(I)]       | R1 = 0.0398, wR2 = 0.1093                                          |                    |
| R indices (all data)              | R1 = 0.0471, wR2 = 0.1184                                          |                    |
| Largest diff. peak and hole       | 0.396 and -0.266 e.Å <sup>-3</sup>                                 |                    |
